# Supplementary material
Source: publisher site journal article supplement (https://www.spandidos-publications.com/838/downloadSupplementary)
Supplement: Supplementary file 1 [file downloadSupplementary]

## Sheet: Nx siMB MDA-MB468
Table SII. Variants detected in each transcriptome.
Chromosome	Region	Type	Reference	Allele	Reference allele	Length	Linkage	Zygosity	Count	Coverage	Frequency	Probability	Forward read count	Reverse read count	Forward/reverse balance	Average quality	Read count	Read coverage	# unique start positions	# unique end positions	BaseQRankSum	Read position test probability	Read direction test probability	Homopolymer	Homopolymer length	QUAL	Homo sapiens (hg19)_Gene	source (Homo sapiens (hg19)_Gene)	Gene Cards	ENSEMBL	gene_name (Homo sapiens (hg19)_Gene)	gene_source (Homo sapiens (hg19)_Gene)	gene_biotype (Homo sapiens (hg19)_Gene)	Coding region change	Amino acid change	Amino acid change in longest transcript	Coding region change in longest transcript	Other variants within codon	Non-synonymous
1	888659	SNV	T	C	No	1		Homozygous	63	63	100	1	44	19	0.301587	37.7143	63	63	26	26		1	1	No	1	200	NOC2L	protein_coding	NOC2L	ENSG00000188976	NOC2L	ensembl_havana	protein_coding	ENST00000327044:c.898A>G	ENSP00000317992:p.Ile300Val	ENSP00000317992:p.Ile300Val	ENST00000327044:c.898A>G	No	Yes
1	909238	SNV	G	C	No	1		Homozygous	7	7	100	1	4	3	0.428571	38	7	7	7	7		1	1	No	1	200	PLEKHN1	protein_coding	PLEKHN1	ENSG00000187583	PLEKHN1	ensembl_havana	protein_coding	ENST00000379407:c.[1355G>C]; ENST00000379409:c.[1616G>C]; ENST00000491024:c.[155G>C]; ENST00000379410:c.[1460G>C]	ENSP00000368717:p.[Arg452Pro]; ENSP00000368719:p.[Arg539Pro]; ENSP00000462558:p.[Arg52Pro]; ENSP00000368720:p.[Arg487Pro]	ENSP00000368719:p.Arg539Pro	ENST00000379409:c.1616G>C	No	Yes
1	985826	SNV	G	A	No	1		Heterozygous	65	152	42.7632	1	59	6	0.0923077	35.6154	65	152	24	25	1.4	0.568465	0.470409	No	1	200	AGRN	protein_coding	AGRN	ENSG00000188157	AGRN	ensembl_havana	protein_coding	ENST00000379370:c.4996G>A	ENSP00000368678:p.Val1666Ile	ENSP00000368678:p.Val1666Ile	ENST00000379370:c.4996G>A	No	Yes
1	1249187	SNV	G	A	No	1		Heterozygous	57	129	44.186	1	19	38	0.333333	38.7544	57	129	22	19	0	0.922367	1	No	1	200	CPSF3L	protein_coding	CPSF3L	ENSG00000127054	CPSF3L	ensembl_havana	protein_coding	ENST00000419704:c.[579C>T]; ENST00000545578:c.[795C>T]; ENST00000434694:c.[972C>T]; ENST00000421495:c.[108C>T]; ENST00000435064:c.[882C>T]; ENST00000527383:c.[*304C>T]; ENST00000411962:c.[588C>T]; ENST00000450926:c.[816C>T]; ENST00000540437:c.[900C>T]; ENST00000531377:c.[*239C>T]; ENST00000527098:c.[*710C>T]; ENST00000528879:c.[817C>T]; ENST00000532772:c.[*304C>T]; ENST00000458452:c.[*1166C>T]	ENSP00000432777:p.[Arg273Cys]		ENST00000458452:c.*1166C>T	No	Yes
1	1277183	SNV	C	T	No	1		Homozygous	32	32	100	1	12	20	0.375	35.0938	32	32	20	19		1	1	No	1	200	DVL1	protein_coding	DVL1	ENSG00000107404	DVL1	ensembl_havana	protein_coding	ENST00000378888:c.[469G>A]; ENST00000378891:c.[469G>A]	ENSP00000368166:p.[Ala157Thr]; ENSP00000368169:p.[Ala157Thr]	ENSP00000368166:p.Ala157Thr	ENST00000378888:c.469G>A	No	Yes
1	1421991	SNV	G	A	No	1		Heterozygous	6	15	40	1	2	4	0.333333	33.3333	6	15	4	4	0	0.601979	1	No	1	149.546	ATAD3B	protein_coding	ATAD3B	ENSG00000160072	ATAD3B	ensembl_havana	protein_coding	ENST00000308647:c.1157G>A	ENSP00000311766:p.Arg386Gln	ENSP00000311766:p.Arg386Gln	ENST00000308647:c.1157G>A	No	Yes
1	1431165	SNV	C	T	No	1		Heterozygous	24	47	51.0638	1	10	14	0.416667	28.9167	24	47	17	18	3.11	0.946351	1	No	1	200	ATAD3B	protein_coding	ATAD3B	ENSG00000160072	ATAD3B	ensembl_havana	protein_coding	ENST00000308647:c.1915C>T	ENSP00000311766:p.Pro639Ser	ENSP00000311766:p.Pro639Ser	ENST00000308647:c.1915C>T	No	Yes
1	1459720	SNV	G	A	No	1		Heterozygous	8	37	21.6216	1	4	4	0.5	37.75	8	37	6	7	0	0.960113	0.984565	No	1	200	ATAD3A	protein_coding	ATAD3A	ENSG00000197785	ATAD3A	ensembl_havana	protein_coding	ENST00000400830:c.[68G>A]; ENST00000536055:c.[920G>A]; ENST00000378756:c.[1157G>A]; ENST00000339113:c.[1112G>A]; ENST00000378755:c.[1301G>A]	ENSP00000383631:p.[Arg23Gln]; ENSP00000439290:p.[Arg307Gln]; ENSP00000368031:p.[Arg386Gln]; ENSP00000339421:p.[Arg371Gln]; ENSP00000368030:p.[Arg434Gln]	ENSP00000368030:p.Arg434Gln	ENST00000378755:c.1301G>A	No	Yes
1	1551927	SNV	T	C	No	1		Homozygous	6	6	100	1	3	3	0.5	37.3333	6	6	6	6		1	1	No	1	200	MIB2	protein_coding	MIB2	ENSG00000197530	MIB2	ensembl_havana	protein_coding	ENST00000360522:c.[43T>C]; ENST00000489635:c.[43T>C]; ENST00000355826:c.[214T>C]; ENST00000520777:c.[214T>C]; ENST00000357210:c.[43T>C]; ENST00000487053:c.[-90T>C]; ENST00000378710:c.[43T>C]; ENST00000518681:c.[214T>C]; ENST00000514363:c.[43T>C]; ENST00000378712:c.[-90T>C]; ENST00000502470:c.[-90T>C]; ENST00000510793:c.[-90T>C]; ENST00000504599:c.[-90T>C]; ENST00000505820:c.[214T>C]	ENSP00000353713:p.[Phe15Leu]; ENSP00000426007:p.[Phe15Leu]; ENSP00000348081:p.[Phe72Leu]; ENSP00000428660:p.[Phe72Leu]; ENSP00000349741:p.[Phe15Leu]; ENSP00000367982:p.[Phe15Leu]; ENSP00000428264:p.[Phe72Leu]; ENSP00000420935:p.[Phe15Leu]; ENSP00000426103:p.[Phe72Leu]	ENSP00000349741:p.Phe15Leu	ENST00000357210:c.43T>C	No	Yes
1	1551948	SNV	C	G	No	1		Homozygous	9	9	100	1	3	6	0.333333	36.6667	9	9	9	9		1	1	No	1	200	MIB2	protein_coding	MIB2	ENSG00000197530	MIB2	ensembl_havana	protein_coding	ENST00000510793:c.[-69C>G]; ENST00000355826:c.[235C>G]; ENST00000489635:c.[64C>G]; ENST00000514363:c.[64C>G]; ENST00000360522:c.[64C>G]; ENST00000504599:c.[-69C>G]; ENST00000378710:c.[64C>G]; ENST00000378712:c.[-69C>G]; ENST00000518681:c.[235C>G]; ENST00000505820:c.[235C>G]; ENST00000487053:c.[-69C>G]; ENST00000502470:c.[-69C>G]; ENST00000357210:c.[64C>G]; ENST00000520777:c.[235C>G]	ENSP00000348081:p.[Pro79Ala]; ENSP00000426007:p.[Pro22Ala]; ENSP00000420935:p.[Pro22Ala]; ENSP00000353713:p.[Pro22Ala]; ENSP00000367982:p.[Pro22Ala]; ENSP00000428264:p.[Pro79Ala]; ENSP00000426103:p.[Pro79Ala]; ENSP00000349741:p.[Pro22Ala]; ENSP00000428660:p.[Pro79Ala]	ENSP00000349741:p.Pro22Ala	ENST00000357210:c.64C>G	No	Yes
1	1575784	SNV	C	T	No	1		Heterozygous	12	41	29.2683	1	6	6	0.5	38.25	12	41	10	10	0	0.996213	1	No	1	200	CDK11B	protein_coding	CDK11B	ENSG00000248333	CDK11B	ensembl_havana	protein_coding	ENST00000341832:c.[973G>A]; ENST00000407249:c.[1114G>A]; ENST00000513088:c.[610G>A]; ENST00000317673:c.[1108G>A]; ENST00000340677:c.[1075G>A]	ENSP00000463048:p.[Gly325Arg]; ENSP00000464036:p.[Gly372Arg]; ENSP00000463404:p.[Gly204Arg]; ENSP00000463200:p.[Gly370Arg]; ENSP00000464016:p.[Gly359Arg]	ENSP00000464036:p.Gly372Arg	ENST00000407249:c.1114G>A	No	Yes
1	1599812	SNV	C	T	No	1		Heterozygous	9	17	52.9412	1	4	5	0.444444	37.3333	9	17	8	8	0	0.769261	0.971521	No	1	200	SLC35E2B	protein_coding	SLC35E2B	ENSG00000189339	SLC35E2B	ensembl_havana	protein_coding	ENST00000378662:c.[934G>A]; ENST00000234800:c.[934G>A]	ENSP00000367931:p.[Val312Ile]; ENSP00000234800:p.[Val312Ile]	ENSP00000367931:p.Val312Ile	ENST00000378662:c.934G>A	No	Yes
1	1647893	SNV	C	T	No	1		Heterozygous	8	48	16.6667	1	4	4	0.5	35.625	8	48	6	6	0	0.158208	1	No	1	200	CDK11A, RP1-283E3.8	protein_coding, processed_transcript	CDK11A, RP1-283E3.8	ENSG00000008128, ENSG00000268575	CDK11A, RP1-283E3.8	ensembl_havana, havana	protein_coding, processed_transcript	ENST00000378638:c.[278G>A]; ENST00000378635:c.[350G>A]; ENST00000509982:c.[380G>A]; ENST00000460465:c.[380G>A]; ENST00000404249:c.[380G>A]; ENST00000356200:c.[278G>A]; ENST00000479362:c.[350G>A]; ENST00000358779:c.[350G>A]; ENST00000378633:c.[350G>A]; ENST00000357760:c.[350G>A]	ENSP00000367905:p.[Arg93Lys]; ENSP00000367902:p.[Arg117Lys]; ENSP00000422149:p.[Arg127Lys]; ENSP00000462289:p.[Arg127Lys]; ENSP00000384442:p.[Arg127Lys]; ENSP00000348529:p.[Arg93Lys]; ENSP00000423900:p.[Arg117Lys]; ENSP00000351629:p.[Arg117Lys]; ENSP00000367900:p.[Arg117Lys]; ENSP00000350403:p.[Arg117Lys]	ENSP00000348529:p.Arg93Lys	ENST00000356200:c.278G>A	No	Yes
1	1650787	SNV	T	C	No	1		Heterozygous	16	19	84.2105	1	7	9	0.4375	37.75	16	19	13	13	0.85	0.966394	1	No	1	200	CDK11A, RP1-283E3.8	protein_coding, processed_transcript	CDK11A, RP1-283E3.8	ENSG00000008128, ENSG00000268575	CDK11A, RP1-283E3.8	ensembl_havana, havana	protein_coding, processed_transcript	ENST00000378633:c.[325+10A>G]; ENST00000509982:c.[335A>G]; ENST00000404249:c.[335A>G]; ENST00000358779:c.[325+10A>G]; ENST00000357760:c.[325+10A>G]; ENST00000378638:c.[233A>G]; ENST00000460465:c.[335A>G]; ENST00000479362:c.[325+10A>G]; ENST00000378635:c.[325+10A>G]; ENST00000356200:c.[233A>G]	ENSP00000422149:p.[His112Arg]; ENSP00000384442:p.[His112Arg]; ENSP00000367905:p.[His78Arg]; ENSP00000462289:p.[His112Arg]; ENSP00000348529:p.[His78Arg]	ENSP00000348529:p.His78Arg	ENST00000356200:c.233A>G	No	Yes
1	1650797	SNV	A	G	No	1		Heterozygous	11	19	57.8947	1	7	4	0.363636	37.9091	11	19	10	10	0	0.89824	0.945576	No	1	200	CDK11A, RP1-283E3.8	protein_coding, processed_transcript	CDK11A, RP1-283E3.8	ENSG00000008128, ENSG00000268575	CDK11A, RP1-283E3.8	ensembl_havana, havana	protein_coding, processed_transcript	ENST00000378635:c.[325T>C]; ENST00000509982:c.[325T>C]; ENST00000479362:c.[325T>C]; ENST00000460465:c.[325T>C]; ENST00000404249:c.[325T>C]; ENST00000378633:c.[325T>C]; ENST00000358779:c.[325T>C]; ENST00000356200:c.[223T>C]; ENST00000357760:c.[325T>C]; ENST00000378638:c.[223T>C]	ENSP00000367902:p.[Trp109Arg]; ENSP00000422149:p.[Cys109Arg]; ENSP00000423900:p.[Trp109Arg]; ENSP00000462289:p.[Cys109Arg]; ENSP00000384442:p.[Cys109Arg]; ENSP00000367900:p.[Trp109Arg]; ENSP00000351629:p.[Trp109Arg]; ENSP00000348529:p.[Cys75Arg]; ENSP00000350403:p.[Trp109Arg]; ENSP00000367905:p.[Cys75Arg]	ENSP00000348529:p.Cys75Arg	ENST00000356200:c.223T>C	No	Yes
1	1650832	SNV	A	G	No	1		Heterozygous	34	63	53.9683	1	11	23	0.323529	37.9412	34	63	17	17	0	0.835618	0.690954	No	1	200	CDK11A, RP1-283E3.8	protein_coding, processed_transcript	CDK11A, RP1-283E3.8	ENSG00000008128, ENSG00000268575	CDK11A, RP1-283E3.8	ensembl_havana, havana	protein_coding, processed_transcript	ENST00000378633:c.[290T>C]; ENST00000357760:c.[290T>C]; ENST00000378638:c.[188T>C]; ENST00000356200:c.[188T>C]; ENST00000460465:c.[290T>C]; ENST00000378635:c.[290T>C]; ENST00000479362:c.[290T>C]; ENST00000404249:c.[290T>C]; ENST00000358779:c.[290T>C]; ENST00000509982:c.[290T>C]	ENSP00000367900:p.[Val97Ala]; ENSP00000350403:p.[Val97Ala]; ENSP00000367905:p.[Val63Ala]; ENSP00000348529:p.[Val63Ala]; ENSP00000462289:p.[Val97Ala]; ENSP00000367902:p.[Val97Ala]; ENSP00000423900:p.[Val97Ala]; ENSP00000384442:p.[Val97Ala]; ENSP00000351629:p.[Val97Ala]; ENSP00000422149:p.[Val97Ala]	ENSP00000348529:p.Val63Ala	ENST00000356200:c.188T>C	No	Yes
1	1650845	SNV	G	A	No	1		Heterozygous	20	56	35.7143	1	11	9	0.45	38.05	20	56	17	17	0	0.821541	0.839946	No	1	200	CDK11A, RP1-283E3.8	protein_coding, processed_transcript	CDK11A, RP1-283E3.8	ENSG00000008128, ENSG00000268575	CDK11A, RP1-283E3.8	ensembl_havana, havana	protein_coding, processed_transcript	ENST00000509982:c.[277C>T]; ENST00000460465:c.[277C>T]; ENST00000358779:c.[277C>T]; ENST00000479362:c.[277C>T]; ENST00000378633:c.[277C>T]; ENST00000378635:c.[277C>T]; ENST00000357760:c.[277C>T]; ENST00000356200:c.[175C>T]; ENST00000404249:c.[277C>T]; ENST00000378638:c.[175C>T]	ENSP00000422149:p.[Arg93Trp]; ENSP00000462289:p.[Arg93Trp]; ENSP00000351629:p.[Arg93Trp]; ENSP00000423900:p.[Arg93Trp]; ENSP00000367900:p.[Arg93Trp]; ENSP00000367902:p.[Arg93Trp]; ENSP00000350403:p.[Arg93Trp]; ENSP00000348529:p.[Arg59Trp]; ENSP00000384442:p.[Arg93Trp]; ENSP00000367905:p.[Arg59Trp]	ENSP00000348529:p.Arg59Trp	ENST00000356200:c.175C>T	No	Yes
1	2126139	SNV	C	G	No	1		Homozygous	7	8	87.5	1	0	7	0	36.7143	7	8	4	5		0.900389	1	No	1	200	C1orf86	protein_coding	C1orf86	ENSG00000162585	C1orf86	ensembl_havana	protein_coding	ENST00000400918:c.[50G>C]; ENST00000414253:c.[50G>C]; ENST00000440825:c.[39G>C]; ENST00000428120:c.[41G>C]; ENST00000400919:c.[-1028G>C]; ENST00000420515:c.[47G>C]; ENST00000378545:c.[372-567G>C]; ENST00000378543:c.[50G>C]; ENST00000378546:c.[50G>C]	ENSP00000383709:p.[Arg17Pro]; ENSP00000410450:p.[Arg17Pro]; ENSP00000405430:p.[Arg14Pro]; ENSP00000409721:p.[Arg16Pro]; ENSP00000367804:p.[Arg17Pro]; ENSP00000367808:p.[Arg17Pro]	ENSP00000405430:p.Arg14Pro	ENST00000428120:c.41G>C	No	Yes
1	2441358	SNV	T	C	No	1		Homozygous	21	21	100	1	9	12	0.428571	38.7619	21	21	13	13		1	1	No	1	200	PANK4	protein_coding	PANK4	ENSG00000157881	PANK4	ensembl_havana	protein_coding	ENST00000435556:c.[1934A>G]; ENST00000378466:c.[2051A>G]; ENST00000505228:c.[*169A>G]; ENST00000502512:c.[*169A>G]	ENSP00000421433:p.[Gln645Arg]; ENSP00000367727:p.[Gln684Arg]	ENSP00000367727:p.Gln684Arg	ENST00000378466:c.2051A>G	No	Yes
1	2488153	SNV	A	G	No	1		Homozygous	8	8	100	1	7	1	0.125	38.375	8	8	7	7		1	1	No	1	200	RP3-395M20.8, TNFRSF14	processed_transcript, protein_coding	RP3-395M20.8, TNFRSF14	ENSG00000238164, ENSG00000157873	RP3-395M20.8, TNFRSF14	havana, ensembl_havana	processed_transcript, protein_coding	ENST00000434817:c.[50A>G]; ENST00000355716:c.[50A>G]; ENST00000451778:c.[50A>G]; ENST00000426449:c.[50A>G]; ENST00000409119:c.[50A>G]; ENST00000435221:c.[50A>G]	ENSP00000415254:p.[Lys17Arg]; ENSP00000347948:p.[Lys17Arg]; ENSP00000399533:p.[Lys17Arg]; ENSP00000411854:p.[Lys17Arg]; ENSP00000386859:p.[Lys17Arg]; ENSP00000399292:p.[Lys17Arg]	ENSP00000347948:p.Lys17Arg	ENST00000355716:c.50A>G	No	Yes
1	3380057	SNV	G	A	No	1		Heterozygous	21	40	52.5	1	8	13	0.380952	38.9048	21	40	10	11	0	0.955996	0.98072	No	1	200	ARHGEF16	protein_coding	ARHGEF16	ENSG00000130762	ARHGEF16	ensembl_havana	protein_coding	ENST00000378378:c.409G>A	ENSP00000367629:p.Val137Met	ENSP00000367629:p.Val137Met	ENST00000378378:c.409G>A	No	Yes
1	3424388	SNV	G	A	No	1		Homozygous	8	8	100	1	4	4	0.5	39.125	8	8	7	7		1	1	No	1	200	MEGF6	protein_coding	MEGF6	ENSG00000162591	MEGF6	ensembl_havana	protein_coding	ENST00000294599:c.[1445C>T]; ENST00000356575:c.[1760C>T]; ENST00000485002:c.[1781C>T]	ENSP00000294599:p.[Pro482Leu]; ENSP00000348982:p.[Pro587Leu]; ENSP00000419033:p.[Pro594Leu]	ENSP00000348982:p.Pro587Leu	ENST00000356575:c.1760C>T	No	Yes
1	3807593	SNV	G	C	No	1		Homozygous	25	25	100	1	7	18	0.28	39.12	25	25	14	14		1	1	No	1	200	C1orf174	protein_coding	C1orf174	ENSG00000198912	C1orf174	ensembl_havana	protein_coding	ENST00000361605:c.158C>G	ENSP00000355306:p.Thr53Arg	ENSP00000355306:p.Thr53Arg	ENST00000361605:c.158C>G	No	Yes
1	5937158	SNV	C	T	No	1		Homozygous	8	8	100	1	3	5	0.375	34.875	8	8	6	6		1	1	No	1	200	NPHP4	protein_coding	NPHP4	ENSG00000131697	NPHP4	ensembl_havana	protein_coding	ENST00000378156:c.[2812G>A]; ENST00000378169:c.[*1713G>A]; ENST00000489180:c.[*360G>A]	ENSP00000367398:p.Val938Met		ENST00000489180:c.*360G>A	No	Yes
1	6257784^6257785	Insertion	-	T	No	1		Heterozygous	117	2238	5.22788	1	1	116	0.00854701	32.1709	117	2238	14	11	0	0	0.753902	Yes	8	200	RPL22	protein_coding	RPL22	ENSG00000116251	RPL22	ensembl_havana	protein_coding	ENST00000484532:c.[-56_-55insA]; ENST00000465335:c.[-56_-55insA]; ENST00000471204:c.[-56_-55insA]; ENST00000497965:c.[-56_-55insA]; ENST00000234875:c.[44_45insA]; ENST00000462296:c.[-56_-55insA]; ENST00000465387:c.[-56_-55insA]	ENSP00000346088:p.Lys16fs	ENSP00000346088:p.Lys16fs	ENST00000234875:c.44_45insA	No	Yes
1	6278414	SNV	A	G	No	1		Homozygous	8	8	100	1	2	6	0.25	33.875	8	8	7	7		1	1	No	1	200	RNF207	protein_coding	RNF207	ENSG00000158286	RNF207	ensembl_havana	protein_coding	ENST00000377939:c.[1718A>G]; ENST00000377948:c.[*435A>G]	ENSP00000367173:p.Asn573Ser	ENSP00000367173:p.Asn573Ser	ENST00000377939:c.1718A>G	No	Yes
1	6293606	SNV	G	C	No	1		Heterozygous	6	97	6.18557	1	3	3	0.5	38.3333	6	97	4	4	0	0.511862	1	No	1	140.003	ICMT	protein_coding	ICMT	ENSG00000116237	ICMT	ensembl_havana	protein_coding	ENST00000343813:c.[382C>G]; ENST00000474756:c.[284+1340C>G]; ENST00000489498:c.[*138C>G]	ENSP00000343552:p.His128Asp	ENSP00000343552:p.His128Asp	ENST00000343813:c.382C>G	No	Yes
1	7887493	SNV	T	C	No	1		Homozygous	7	7	100	1	5	2	0.285714	37	7	7	4	4		1	1	No	1	200	PER3	protein_coding	PER3	ENSG00000049246	PER3	ensembl_havana	protein_coding	ENST00000361923:c.[2480T>C]; ENST00000377532:c.[2504T>C]	ENSP00000355031:p.[Leu827Pro]; ENSP00000366755:p.[Leu835Pro]	ENSP00000366755:p.Leu835Pro	ENST00000377532:c.2504T>C	No	Yes
1	8025475^8025476	Insertion	-	A	No	1		Heterozygous	13	522	2.49042	1	7	6	0.461538	39	13	522	7	8	0	0.00798114	0.821654	Yes	7	200	PARK7	protein_coding	PARK7	ENSG00000116288	PARK7	ensembl_havana	protein_coding	ENST00000377488:c.[182_183insA]; ENST00000377491:c.[182_183insA]; ENST00000493678:c.[182_183insA]; ENST00000469225:c.[65_66insA]; ENST00000338639:c.[182_183insA]; ENST00000493373:c.[182_183insA]; ENST00000377493:c.[182_183insA]	ENSP00000366708:p.[Glu64fs]; ENSP00000366711:p.[Glu64fs]; ENSP00000418770:p.[Glu64fs]; ENSP00000466756:p.[Glu25fs]; ENSP00000340278:p.[Glu64fs]; ENSP00000465404:p.[Glu64fs]; ENSP00000466242:p.[Glu64fs]	ENSP00000418770:p.Glu64fs	ENST00000493678:c.182_183insA	No	Yes
1	10190773	SNV	G	A	No	1		Homozygous	6	6	100	1	3	3	0.5	39.8333	6	6	6	6		1	1	No	1	200	UBE4B	protein_coding	UBE4B	ENSG00000130939	UBE4B	ensembl_havana	protein_coding	ENST00000343090:c.[1813G>A]; ENST00000470736:c.[175G>A]; ENST00000377157:c.[1078G>A]; ENST00000253251:c.[1426G>A]	ENSP00000343001:p.[Val605Ile]; ENSP00000467258:p.[Val59Ile]; ENSP00000366362:p.[Val360Ile]; ENSP00000253251:p.[Val476Ile]	ENSP00000366362:p.Val360Ile	ENST00000377157:c.1078G>A	No	Yes
1	10523185	SNV	G	C	No	1		Heterozygous	6	26	23.0769	1	6	0	0	30.6667	6	26	4	2	1.14	0.00840462	0.043617	No	1	200	DFFA	protein_coding	DFFA	ENSG00000160049	DFFA	ensembl_havana	protein_coding	ENST00000377038:c.[713C>G]; ENST00000377036:c.[713C>G]; ENST00000476658:c.[*43C>G]	ENSP00000366237:p.[Ala238Gly]; ENSP00000366235:p.[Ala238Gly]	ENSP00000366237:p.Ala238Gly	ENST00000377038:c.713C>G	No	Yes
1	11114940	SNV	G	T	No	1		Homozygous	134	134	100	1	75	59	0.440299	37.0746	134	134	39	35		1	1	No	1	200	SRM	protein_coding	SRM	ENSG00000116649	SRM	ensembl_havana	protein_coding	ENST00000490101:c.[241C>A]; ENST00000376957:c.[891C>A]	ENSP00000465966:p.[Pro81Thr]		ENST00000376957:c.891C>A	No	Yes
1	11136981	SNV	G	C	No	1		Heterozygous	7	34	20.5882	1	7	0	0	21.7143	7	34	2	3	2.76	0.0351361	0.110131	No	1	145.396	EXOSC10	protein_coding	EXOSC10	ENSG00000171824	EXOSC10	ensembl_havana	protein_coding	ENST00000544779:c.[*437C>G]; ENST00000376936:c.[1904C>G]; ENST00000304457:c.[1904C>G]	ENSP00000366135:p.[Ala635Gly]; ENSP00000307307:p.[Ala635Gly]		ENST00000544779:c.*437C>G	No	Yes
1	11710561	SNV	T	G	No	1		Homozygous	14	14	100	1	1	13	0.0714286	38.1429	14	14	9	9		1	1	No	1	200	FBXO2	protein_coding	FBXO2	ENSG00000116661	FBXO2	ensembl_havana	protein_coding	ENST00000354287:c.353A>C	ENSP00000346240:p.Lys118Thr	ENSP00000346240:p.Lys118Thr	ENST00000354287:c.353A>C	No	Yes
1	11721321	SNV	G	A	No	1		Homozygous	13	13	100	1	3	10	0.230769	35.5385	13	13	10	8		1	1	No	1	200	FBXO44	protein_coding	FBXO44	ENSG00000132879	FBXO44	ensembl_havana	protein_coding	ENST00000251547:c.[759G>A]; ENST00000376762:c.[634G>A]; ENST00000376760:c.[634G>A]; ENST00000475435:c.[403G>A]; ENST00000251546:c.[634G>A]; ENST00000376768:c.[730G>A]; ENST00000376770:c.[759G>A]; ENST00000471895:c.[358G>A]	ENSP00000365953:p.[Ala212Thr]; ENSP00000365951:p.[Ala212Thr]; ENSP00000473420:p.[Ala135Thr]; ENSP00000251546:p.[Ala212Thr]; ENSP00000365959:p.[Ala244Thr]; ENSP00000473653:p.[Ala120Thr]		ENST00000376770:c.759G>A	No	Yes
1	12009911	SNV	G	A	No	1		Homozygous	25	25	100	1	16	9	0.36	35.84	25	25	16	17		1	1	No	1	200	PLOD1	protein_coding	PLOD1	ENSG00000083444	PLOD1	ensembl_havana	protein_coding	ENST00000376369:c.[391G>A]; ENST00000449038:c.[391G>A]; ENST00000196061:c.[250G>A]; ENST00000429000:c.[250G>A]	ENSP00000365548:p.[Ala131Thr]; ENSP00000414443:p.[Ala131Thr]; ENSP00000196061:p.[Ala84Thr]; ENSP00000405372:p.[Ala84Thr]	ENSP00000196061:p.Ala84Thr	ENST00000196061:c.250G>A	No	Yes
1	12009956	SNV	G	A	No	1		Homozygous	11	12	91.6667	1	5	6	0.454545	36.9091	11	12	9	10		0.985967	1	No	1	200	PLOD1	protein_coding	PLOD1	ENSG00000083444	PLOD1	ensembl_havana	protein_coding	ENST00000429000:c.[295G>A]; ENST00000376369:c.[436G>A]; ENST00000449038:c.[436G>A]; ENST00000196061:c.[295G>A]	ENSP00000405372:p.[Ala99Thr]; ENSP00000365548:p.[Ala146Thr]; ENSP00000414443:p.[Ala146Thr]; ENSP00000196061:p.[Ala99Thr]	ENSP00000196061:p.Ala99Thr	ENST00000196061:c.295G>A	No	Yes
1	12082334	SNV	A	T	No	1		Homozygous	16	16	100	1	8	8	0.5	39.125	16	16	10	10		1	1	No	1	200	MIIP	protein_coding	MIIP	ENSG00000116691	MIIP	ensembl_havana	protein_coding	ENST00000436478:c.[297A>T]; ENST00000235332:c.[297A>T]	ENSP00000392417:p.[Lys99Asn]; ENSP00000235332:p.[Lys99Asn]	ENSP00000235332:p.Lys99Asn	ENST00000235332:c.297A>T	No	Yes
1	12082926	SNV	A	G	No	1		Homozygous	19	19	100	1	16	3	0.157895	35.8421	19	19	13	13		1	1	No	1	200	MIIP	protein_coding	MIIP	ENSG00000116691	MIIP	ensembl_havana	protein_coding	ENST00000235332:c.[499A>G]; ENST00000436478:c.[499A>G]	ENSP00000235332:p.[Lys167Glu]; ENSP00000392417:p.[Lys167Glu]	ENSP00000235332:p.Lys167Glu	ENST00000235332:c.499A>G	No	Yes
1	16042766	SNV	T	C	No	1		Homozygous	9	10	90	1	4	5	0.444444	40.2222	9	10	7	7		0.976505	0.999942	No	1	200	PLEKHM2	protein_coding	PLEKHM2	ENSG00000116786	PLEKHM2	ensembl_havana	protein_coding	ENST00000375799:c.[95T>C]; ENST00000375793:c.[95T>C]	ENSP00000364956:p.[Ile32Thr]; ENSP00000364950:p.[Ile32Thr]	ENSP00000364956:p.Ile32Thr	ENST00000375799:c.95T>C	No	Yes
1	16259813	SNV	A	G	No	1		Homozygous	6	6	100	1	1	5	0.166667	36.3333	6	6	4	4		1	1	No	1	200	SPEN	protein_coding	SPEN	ENSG00000065526	SPEN	ensembl_havana	protein_coding	ENST00000375759:c.7078A>G	ENSP00000364912:p.Asn2360Asp	ENSP00000364912:p.Asn2360Asp	ENST00000375759:c.7078A>G	No	Yes
1	16890476	SNV	G	A	No	1		Heterozygous	9	26	34.6154	1	4	5	0.444444	37.7778	9	26	6	6	0	0.250619	1	No	1	200	NBPF1	protein_coding	NBPF1	ENSG00000219481	NBPF1	ensembl_havana	protein_coding	ENST00000430580:c.3382C>T	ENSP00000474456:p.His1128Tyr	ENSP00000474456:p.His1128Tyr	ENST00000430580:c.3382C>T	Yes	Yes
1	16890598	SNV	T	A	No	1		Heterozygous	14	103	13.5922	1	9	5	0.357143	37.3571	14	103	9	9	0	0.700809	1	No	1	200	NBPF1	protein_coding	NBPF1	ENSG00000219481	NBPF1	ensembl_havana	protein_coding	ENST00000430580:c.3260A>T	ENSP00000474456:p.Tyr1087Phe	ENSP00000474456:p.Tyr1087Phe	ENST00000430580:c.3260A>T	No	Yes
1	16890671..16890672	MNV	TG	CA	No	2		Heterozygous	17	46	36.9565	1	3	14	0.176471	36.3824	17	46	13	13	1.74	0.327864	0.951332	No	1	200	NBPF1	protein_coding	NBPF1	ENSG00000219481	NBPF1	ensembl_havana	protein_coding	ENST00000430580:c.3186_3187delCAinsTG	ENSP00000474456:p.Met1063Val	ENSP00000474456:p.Met1063Val	ENST00000430580:c.3186_3187delCAinsTG	No	Yes
1	16893701	SNV	G	A	No	1		Heterozygous	8	78	10.2564	1	5	3	0.375	37.5	8	78	8	8	0.57	0.979502	0.998636	No	1	200	NBPF1	protein_coding	NBPF1	ENSG00000219481	NBPF1	ensembl_havana	protein_coding	ENST00000392963:c.[*1680C>T]; ENST00000432949:c.[*122C>T]; ENST00000430580:c.[2812C>T]; ENST00000420031:c.[*364C>T]	ENSP00000474456:p.Arg938Cys	ENSP00000474456:p.Arg938Cys	ENST00000430580:c.2812C>T	No	Yes
1	16903912	SNV	T	A	No	1		Homozygous	6	6	100	1	4	2	0.333333	37.1667	6	6	5	5		1	1	No	1	200	NBPF1	protein_coding	NBPF1	ENSG00000219481	NBPF1	ensembl_havana	protein_coding	ENST00000392963:c.[*672A>T]; ENST00000430580:c.[1804A>T]; ENST00000432949:c.[178A>T]	ENSP00000474456:p.[Asn602Tyr]; ENSP00000473697:p.[Asn60Tyr]	ENSP00000474456:p.Asn602Tyr	ENST00000430580:c.1804A>T	No	Yes
1	17991052	SNV	T	C	No	1		Homozygous	7	8	87.5	1	3	4	0.428571	35.2857	7	8	4	5		0.957626	0.996325	No	1	200	ARHGEF10L	protein_coding	ARHGEF10L	ENSG00000074964	ARHGEF10L	ensembl_havana	protein_coding	ENST00000375415:c.[2854T>C]; ENST00000452522:c.[2854T>C]; ENST00000361221:c.[2971T>C]; ENST00000375408:c.[2290T>C]; ENST00000434513:c.[2956T>C]; ENST00000167825:c.[2080T>C]	ENSP00000364564:p.[Trp952Arg]; ENSP00000399401:p.[Trp952Arg]; ENSP00000355060:p.[Trp991Arg]; ENSP00000364557:p.[Trp764Arg]; ENSP00000394621:p.[Trp986Arg]; ENSP00000167825:p.[Trp694Arg]	ENSP00000355060:p.Trp991Arg	ENST00000361221:c.2971T>C	No	Yes
1	18023690	SNV	A	G	No	1		Homozygous	7	8	87.5	1	5	2	0.285714	37.8571	7	8	4	4		0.957626	0.999405	No	1	200	ARHGEF10L	protein_coding	ARHGEF10L	ENSG00000074964	ARHGEF10L	ensembl_havana	protein_coding	ENST00000375408:c.[2974A>G]; ENST00000375415:c.[3538A>G]; ENST00000167825:c.[2764A>G]; ENST00000452522:c.[3538A>G]; ENST00000361221:c.[3655A>G]	ENSP00000364557:p.[Ile992Val]; ENSP00000364564:p.[Ile1180Val]; ENSP00000167825:p.[Ile922Val]; ENSP00000399401:p.[Ile1180Val]; ENSP00000355060:p.[Ile1219Val]	ENSP00000355060:p.Ile1219Val	ENST00000361221:c.3655A>G	No	Yes
1	19413261	SNV	T	A	No	1		Homozygous	34	36	94.4444	1	24	10	0.294118	37.1471	34	36	22	23		0.999863	0.998292	No	1	200	UBR4	protein_coding	UBR4	ENSG00000127481	UBR4	ensembl_havana	protein_coding	ENST00000375224:c.[1720A>T]; ENST00000375226:c.[14527A>T]; ENST00000375267:c.[14599A>T]; ENST00000429347:c.[1168A>T]; ENST00000543981:c.[1591A>T]; ENST00000375217:c.[14578A>T]; ENST00000375254:c.[14599A>T]	ENSP00000364372:p.[Met574Leu]; ENSP00000364374:p.[Met4843Leu]; ENSP00000364416:p.[Met4867Leu]; ENSP00000394173:p.[Met390Leu]; ENSP00000444070:p.[Met531Leu]; ENSP00000364365:p.[Met4860Leu]; ENSP00000364403:p.[Met4867Leu]	ENSP00000364416:p.Met4867Leu	ENST00000375267:c.14599A>T	No	Yes
1	19634964	SNV	C	G	No	1		Homozygous	38	38	100	1	18	20	0.473684	37.9737	38	38	22	21		1	1	No	1	200	AKR7A2	protein_coding	AKR7A2	ENSG00000053371	AKR7A2	ensembl_havana	protein_coding	ENST00000330072:c.[441G>C]; ENST00000489286:c.[252G>C]; ENST00000235835:c.[471G>C]; ENST00000481966:c.[36G>C]	ENSP00000339084:p.[Gln147His]; ENSP00000419936:p.[Gln84His]; ENSP00000235835:p.[Gln157His]; ENSP00000417891:p.[Gln12His]	ENSP00000235835:p.Gln157His	ENST00000235835:c.471G>C	No	Yes
1	19712083	SNV	T	G	No	1		Heterozygous	55	158	34.8101	1	34	21	0.381818	16.4364	55	158	19	19	9.39	7.93144e-07	0.968838	No	1	200	CAPZB	protein_coding	CAPZB	ENSG00000077549	CAPZB	ensembl_havana	protein_coding	ENST00000264203:c.[209A>C]; ENST00000375144:c.[95A>C]; ENST00000433834:c.[218A>C]; ENST00000401084:c.[131A>C]; ENST00000264202:c.[131A>C]; ENST00000375142:c.[131A>C]; ENST00000413711:c.[95A>C]; ENST00000457768:c.[47A>C]	ENSP00000264203:p.[Asp70Ala]; ENSP00000364286:p.[Asp32Ala]; ENSP00000401010:p.[Asp73Ala]; ENSP00000383862:p.[Asp44Ala]; ENSP00000264202:p.[Asp44Ala]; ENSP00000364284:p.[Asp44Ala]; ENSP00000392781:p.[Asp32Ala]; ENSP00000400757:p.[Asp16Ala]	ENSP00000264203:p.Asp70Ala	ENST00000264203:c.209A>C	No	Yes
1	20977000	SNV	A	C	No	1		Homozygous	128	129	99.2248	1	71	57	0.445312	37.8438	128	129	43	42		1	1	No	1	200	PINK1, PINK1-AS, AL391357.1	protein_coding, antisense, pseudogene	PINK1, PINK1-AS, AL391357.1	ENSG00000158828, ENSG00000117242, ENSG00000257033	PINK1, PINK1-AS, AL391357.1	ensembl_havana, havana, ensembl	protein_coding, antisense, pseudogene	ENST00000321556:c.1562A>C	ENSP00000364204:p.Asn521Thr	ENSP00000364204:p.Asn521Thr	ENST00000321556:c.1562A>C	No	Yes
1	20987873	SNV	G	C	No	1		Homozygous	18	18	100	1	5	13	0.277778	37.1667	18	18	12	10		1	1	No	1	200	DDOST	protein_coding	DDOST	ENSG00000244038	DDOST	ensembl_havana	protein_coding	ENST00000464364:c.[-30C>G]; ENST00000375048:c.[22C>G]; ENST00000415136:c.[22C>G]; ENST00000602624:c.[-30C>G]	ENSP00000364188:p.[Arg8Gly]; ENSP00000399457:p.[Arg8Gly]	ENSP00000364188:p.Arg8Gly	ENST00000375048:c.22C>G	No	Yes
1	23419374	SNV	G	T	No	1		Heterozygous	6	11	54.5455	1	1	5	0.166667	37.5	6	11	5	5	0.72	0.528912	0.793691	No	1	200	LUZP1	protein_coding	LUZP1	ENSG00000169641	LUZP1	ensembl_havana	protein_coding	ENST00000314174:c.[1381C>A]; ENST00000418342:c.[1381C>A]; ENST00000302291:c.[1381C>A]; ENST00000374623:c.[1381C>A]	ENSP00000313705:p.[Gln461Lys]; ENSP00000393460:p.[Gln461Lys]; ENSP00000303758:p.[Gln461Lys]; ENSP00000363752:p.[Gln461Lys]	ENSP00000303758:p.Gln461Lys	ENST00000302291:c.1381C>A	No	Yes
1	23847464	SNV	C	A	No	1		Heterozygous	12	26	46.1538	1	3	9	0.25	38.5	12	26	8	7	0	0.414366	0.986378	No	1	200	E2F2	protein_coding	E2F2	ENSG00000007968	E2F2	ensembl_havana	protein_coding	ENST00000361729:c.678G>T	ENSP00000355249:p.Gln226His	ENSP00000355249:p.Gln226His	ENST00000361729:c.678G>T	No	Yes
1	23885498	SNV	T	C	No	1		Homozygous	90	90	100	1	27	63	0.3	37.2667	90	90	41	41		1	1	No	1	200	ID3	protein_coding	ID3	ENSG00000117318	ID3	ensembl_havana	protein_coding	ENST00000374561:c.313A>G	ENSP00000363689:p.Thr105Ala	ENSP00000363689:p.Thr105Ala	ENST00000374561:c.313A>G	No	Yes
1	23885662	SNV	C	G	No	1		Heterozygous	39	63	61.9048	1	20	19	0.487179	35.6154	39	63	22	22	0	0.805478	0.995579	No	1	200	ID3	protein_coding	ID3	ENSG00000117318	ID3	ensembl_havana	protein_coding	ENST00000374561:c.256G>C	ENSP00000363689:p.Glu86Gln	ENSP00000363689:p.Glu86Gln	ENST00000374561:c.256G>C	No	Yes
1	24447468	SNV	G	C	No	1		Homozygous	6	6	100	1	3	3	0.5	39.6667	6	6	5	5		1	1	No	1	200	IL22RA1	protein_coding	IL22RA1	ENSG00000142677	IL22RA1	ensembl_havana	protein_coding	ENST00000270800:c.1552C>G	ENSP00000270800:p.Arg518Gly	ENSP00000270800:p.Arg518Gly	ENST00000270800:c.1552C>G	No	Yes
1	25555530^25555531	Insertion	-	T	No	1		Heterozygous	6	146	4.10959	1	0	6	0	40.1667	6	146	5	5	0	0.0709345	0.101048	Yes	6	200	SYF2	protein_coding	SYF2	ENSG00000117614	SYF2	ensembl_havana	protein_coding	ENST00000354361:c.[133-805_133-804insA]; ENST00000236273:c.[216_217insA]	ENSP00000236273:p.Ala73fs	ENSP00000236273:p.Ala73fs	ENST00000236273:c.216_217insA	No	Yes
1	25889632	SNV	T	C	No	1		Heterozygous	25	63	39.6825	1	20	5	0.2	39.44	25	63	14	12	0	0.685834	0.871974	No	1	200	LDLRAP1	protein_coding	LDLRAP1	ENSG00000157978	LDLRAP1	ensembl_havana	protein_coding	ENST00000374338:c.604T>C	ENSP00000363458:p.Ser202Pro	ENSP00000363458:p.Ser202Pro	ENST00000374338:c.604T>C	No	Yes
1	26131654	SNV	G	A	No	1		Homozygous	22	22	100	1	17	5	0.227273	37.7727	22	22	18	19		1	1	No	1	200	SEPN1	protein_coding	SEPN1	ENSG00000162430	SEPN1	ensembl_havana	protein_coding	ENST00000354177:c.[323G>A]; ENST00000361547:c.[425G>A]; ENST00000374315:c.[323G>A]	ENSP00000346109:p.[Cys108Tyr]; ENSP00000355141:p.[Cys142Tyr]; ENSP00000363434:p.[Cys108Tyr]	ENSP00000355141:p.Cys142Tyr	ENST00000361547:c.425G>A	No	Yes
1	26140573	SNV	C	A	No	1		Heterozygous	14	25	56	1	7	7	0.5	35.5714	14	25	10	10	1.28	0.847528	1	No	1	200	SEPN1, RP1-317E23.6	protein_coding, protein_coding	SEPN1, RP1-317E23.6	ENSG00000162430, ENSG00000255054	SEPN1, RP1-317E23.6	ensembl_havana, havana	protein_coding, protein_coding	ENST00000354177:c.[1404C>A]; ENST00000361547:c.[1506C>A]; ENST00000527604:c.[27C>A]; ENST00000374315:c.[1404C>A]	ENSP00000346109:p.[Asn468Lys]; ENSP00000355141:p.[Asn502Lys]; ENSP00000457066:p.[Asn9Lys]; ENSP00000363434:p.[Asn468Lys]	ENSP00000355141:p.Asn502Lys	ENST00000361547:c.1506C>A	No	Yes
1	26515956	SNV	C	T	No	1		Heterozygous	31	54	57.4074	1	9	22	0.290323	35.4839	31	54	15	16	1.92	0.832694	0.796363	No	1	200	CNKSR1	protein_coding	CNKSR1	ENSG00000142675	CNKSR1	ensembl_havana	protein_coding	ENST00000482227:c.[*1364C>T]; ENST00000374253:c.[2080C>T]; ENST00000361530:c.[2059C>T]; ENST00000531191:c.[1285C>T]	ENSP00000363371:p.[His694Tyr]; ENSP00000354609:p.[His687Tyr]; ENSP00000431817:p.[His429Tyr]	ENSP00000431817:p.His429Tyr	ENST00000531191:c.1285C>T	No	Yes
1	26596080	SNV	G	A	No	1		Heterozygous	12	26	46.1538	1	9	3	0.25	38	12	26	7	7	0	0.924106	0.986378	No	1	200	CEP85	protein_coding	CEP85	ENSG00000130695	CEP85	ensembl_havana	protein_coding	ENST00000476272:c.[1624G>A]; ENST00000252992:c.[1624G>A]; ENST00000451429:c.[1471G>A]; ENST00000453146:c.[643G>A]	ENSP00000432354:p.[Ala542Thr]; ENSP00000252992:p.[Ala542Thr]; ENSP00000417002:p.[Ala491Thr]; ENSP00000391790:p.[Ala215Thr]	ENSP00000252992:p.Ala542Thr	ENST00000252992:c.1624G>A	No	Yes
1	26610891	SNV	A	C	No	1		Homozygous	33	33	100	1	13	20	0.393939	37	33	33	17	18		1	1	No	1	200	UBXN11	protein_coding	UBXN11	ENSG00000158062	UBXN11	ensembl_havana	protein_coding	ENST00000357089:c.[836T>G]; ENST00000314675:c.[575T>G]; ENST00000374221:c.[935T>G]; ENST00000374223:c.[206T>G]; ENST00000374222:c.[935T>G]; ENST00000374217:c.[836T>G]	ENSP00000349601:p.[Leu279Arg]; ENSP00000324721:p.[Leu192Arg]; ENSP00000363338:p.[Leu312Arg]; ENSP00000363340:p.[Leu69Arg]; ENSP00000363339:p.[Leu312Arg]; ENSP00000363334:p.[Leu279Arg]	ENSP00000324721:p.Leu192Arg	ENST00000314675:c.575T>G	No	Yes
1	26620761	SNV	T	C	No	1		Heterozygous	6	23	26.087	1	3	3	0.5	37	6	23	5	5	0	0.382208	1	No	1	156.536	UBXN11	protein_coding	UBXN11	ENSG00000158062	UBXN11	ensembl_havana	protein_coding	ENST00000374217:c.[395A>G]; ENST00000423664:c.[380A>G]; ENST00000442942:c.[395A>G]; ENST00000374221:c.[494A>G]; ENST00000535108:c.[20A>G]; ENST00000374223:c.[-171+2649A>G]; ENST00000374222:c.[494A>G]; ENST00000452980:c.[395A>G]; ENST00000436301:c.[269A>G]; ENST00000314675:c.[199+6656A>G]; ENST00000357089:c.[395A>G]; ENST00000374215:c.[380A>G]; ENST00000450041:c.[269A>G]	ENSP00000363334:p.[Glu132Gly]; ENSP00000394036:p.[Glu127Gly]; ENSP00000404956:p.[Glu132Gly]; ENSP00000363338:p.[Glu165Gly]; ENSP00000446034:p.[Glu7Gly]; ENSP00000363339:p.[Glu165Gly]; ENSP00000410357:p.[Glu132Gly]; ENSP00000393858:p.[Glu90Gly]; ENSP00000349601:p.[Glu132Gly]; ENSP00000363332:p.[Glu127Gly]; ENSP00000413448:p.[Glu90Gly]		ENST00000314675:c.199+6656A>G	No	Yes
1	26669345	SNV	C	T	No	1		Heterozygous	11	22	50	1	6	5	0.454545	38.5455	11	22	6	6	0	0.543223	0.999363	No	1	200	AIM1L	protein_coding	AIM1L	ENSG00000176092	AIM1L	ensembl_havana	protein_coding	ENST00000308182:c.[-32G>A]; ENST00000374207:c.[*78G>A]; ENST00000527815:c.[482G>A]	ENSP00000433931:p.Arg161Gln	ENSP00000433931:p.Arg161Gln	ENST00000527815:c.482G>A	No	Yes
1	26670444	SNV	G	T	No	1		Heterozygous	11	25	44	1	7	4	0.363636	33	11	25	11	11	2.11	0.505917	0.8346	No	1	200	AIM1L	protein_coding	AIM1L	ENSG00000176092	AIM1L	ensembl_havana	protein_coding	ENST00000527815:c.[83C>A]; ENST00000374207:c.[740C>A]	ENSP00000433931:p.[Ser28Tyr]; ENSP00000363323:p.[Ser247Tyr]	ENSP00000433931:p.Ser28Tyr	ENST00000527815:c.83C>A	No	Yes
1	26670609	SNV	C	T	No	1		Heterozygous	9	24	37.5	1	5	4	0.444444	38.1111	9	24	6	6	1.89	0.606567	0.652291	No	1	200	AIM1L	protein_coding	AIM1L	ENSG00000176092	AIM1L	ensembl_havana	protein_coding	ENST00000374207:c.575G>A	ENSP00000363323:p.Arg192His	ENSP00000363323:p.Arg192His	ENST00000374207:c.575G>A	No	Yes
1	26863453	SNV	C	T	No	1		Heterozygous	18	44	40.9091	1	12	6	0.333333	37.5556	18	44	13	14	1.92	0.994125	0.973744	No	1	200	RPS6KA1	protein_coding	RPS6KA1	ENSG00000117676	RPS6KA1	ensembl_havana	protein_coding	ENST00000374162:c.[-59C>T]; ENST00000526040:c.[101C>T]; ENST00000525525:c.[*88C>T]; ENST00000374168:c.[101C>T]; ENST00000529454:c.[-59C>T]; ENST00000526792:c.[-176C>T]; ENST00000374166:c.[101C>T]	ENSP00000436990:p.[Pro34Leu]; ENSP00000363283:p.[Pro34Leu]; ENSP00000363281:p.[Pro34Leu]	ENSP00000363283:p.Pro34Leu	ENST00000374168:c.101C>T	No	Yes
1	26879920	SNV	T	C	No	1		Homozygous	53	53	100	1	33	20	0.377358	38.1887	53	53	23	23		1	1	No	1	200	RPS6KA1	protein_coding	RPS6KA1	ENSG00000117676	RPS6KA1	ensembl_havana	protein_coding	ENST00000374162:c.[231T>C]; ENST00000526040:c.[*149T>C]; ENST00000526792:c.[231T>C]; ENST00000531382:c.[534T>C]; ENST00000530003:c.[459T>C]; ENST00000374163:c.[613T>C]; ENST00000374166:c.[507T>C]; ENST00000374168:c.[507T>C]; ENST00000529454:c.[231T>C]	ENSP00000363278:p.[*205Arg]	ENSP00000363278:p.*205Arg	ENST00000374163:c.613T>C	No	Yes
1	27210721	SNV	T	C	No	1		Homozygous	14	14	100	1	7	7	0.5	38.5	14	14	10	10		1	1	No	1	200	GPN2	protein_coding	GPN2	ENSG00000142751	GPN2	ensembl_havana	protein_coding	ENST00000374133:c.[253A>G]; ENST00000374135:c.[790A>G]	ENSP00000363248:p.[Arg85Gly]; ENSP00000363250:p.[Arg264Gly]	ENSP00000363250:p.Arg264Gly	ENST00000374135:c.790A>G	No	Yes
1	27212513	SNV	T	C	No	1		Homozygous	12	12	100	1	8	4	0.333333	38.6667	12	12	10	10		1	1	No	1	200	GPN2	protein_coding	GPN2	ENSG00000142751	GPN2	ensembl_havana	protein_coding	ENST00000374135:c.[680A>G]; ENST00000431781:c.[*129A>G]; ENST00000374133:c.[143A>G]	ENSP00000363250:p.[Gln227Arg]; ENSP00000363248:p.[Gln48Arg]	ENSP00000363250:p.Gln227Arg	ENST00000374135:c.680A>G	No	Yes
1	27278573	SNV	T	C	No	1		Homozygous	31	31	100	1	22	9	0.290323	37.0323	31	31	14	12		1	1	No	1	200	C1orf172	protein_coding	C1orf172	ENSG00000175707	C1orf172	ensembl_havana	protein_coding	ENST00000320567:c.299A>G	ENSP00000319179:p.Gln100Arg	ENSP00000319179:p.Gln100Arg	ENST00000320567:c.299A>G	No	Yes
1	27332466	SNV	T	C	No	1		Homozygous	6	6	100	1	6	0	0	36.8333	6	6	3	3		1	1	No	1	200	FAM46B	protein_coding	FAM46B	ENSG00000158246	FAM46B	ensembl_havana	protein_coding	ENST00000289166:c.1247A>G	ENSP00000289166:p.His416Arg	ENSP00000289166:p.His416Arg	ENST00000289166:c.1247A>G	No	Yes
1	27682530	SNV	C	G	No	1		Homozygous	37	37	100	1	15	22	0.405405	38.7027	37	37	20	20		1	1	No	1	200	MAP3K6	protein_coding	MAP3K6	ENSG00000142733	MAP3K6	ensembl_havana	protein_coding	ENST00000374040:c.[3674G>C]; ENST00000357582:c.[3698G>C]; ENST00000472410:c.[2360-687G>C]; ENST00000486046:c.[143G>C]; ENST00000493901:c.[3698G>C]	ENSP00000363152:p.[Gly1225Ala]; ENSP00000350195:p.[Gly1233Ala]; ENSP00000418932:p.[Gly48Ala]; ENSP00000419591:p.[Gly1233Ala]	ENSP00000363152:p.Gly1225Ala	ENST00000374040:c.3674G>C	No	Yes
1	28600574	SNV	C	T	No	1		Homozygous	7	7	100	1	4	3	0.428571	37.5714	7	7	4	4		1	1	No	1	200	SESN2	protein_coding	SESN2	ENSG00000130766	SESN2	ensembl_havana	protein_coding	ENST00000253063:c.925C>T	ENSP00000253063:p.His309Tyr	ENSP00000253063:p.His309Tyr	ENST00000253063:c.925C>T	No	Yes
1	29475341	SNV	C	T	No	1		Homozygous	91	91	100	1	40	51	0.43956	36.8462	91	91	39	37		1	1	No	1	200	SRSF4	protein_coding	SRSF4	ENSG00000116350	SRSF4	ensembl_havana	protein_coding	ENST00000546138:c.[*284G>A]; ENST00000373795:c.[1066G>A]	ENSP00000362900:p.Gly356Ser	ENSP00000362900:p.Gly356Ser	ENST00000373795:c.1066G>A	No	Yes
1	29475394	SNV	C	G	No	1		Homozygous	68	68	100	1	20	48	0.294118	36.0588	68	68	28	31		1	1	No	1	200	SRSF4	protein_coding	SRSF4	ENSG00000116350	SRSF4	ensembl_havana	protein_coding	ENST00000373795:c.[1013G>C]; ENST00000546138:c.[*231G>C]	ENSP00000362900:p.Gly338Ala	ENSP00000362900:p.Gly338Ala	ENST00000373795:c.1013G>C	No	Yes
1	29475648	SNV	T	G	No	1		Heterozygous	50	52	96.1538	1	15	35	0.3	37.54	50	52	24	23	0	0.991762	0.994326	No	1	200	SRSF4	protein_coding	SRSF4	ENSG00000116350	SRSF4	ensembl_havana	protein_coding	ENST00000373795:c.[759A>C]; ENST00000546138:c.[454A>C]	ENSP00000362900:p.[Glu253Asp]; ENSP00000444600:p.[Lys152Gln]	ENSP00000362900:p.Glu253Asp	ENST00000373795:c.759A>C	Yes	Yes
1	29542637	SNV	A	G	No	1		Homozygous	34	34	100	1	11	23	0.323529	37.8824	34	34	18	18		1	1	No	1	200	MECR	protein_coding	MECR	ENSG00000116353	MECR	ensembl_havana	protein_coding	ENST00000263702:c.[286T>C]; ENST00000373791:c.[58T>C]	ENSP00000263702:p.[Phe96Leu]; ENSP00000362896:p.[Phe20Leu]	ENSP00000362896:p.Phe20Leu	ENST00000373791:c.58T>C	No	Yes
1	31902257..31902258	Deletion	CC	-	No	2		Heterozygous	15	19	78.9474	1	10	5	0.333333	37.1333	15	19	10	10	0	0.953603	0.999918	Yes	5	200	SERINC2, AC114494.1	protein_coding, protein_coding	SERINC2, AC114494.1	ENSG00000168528, ENSG00000268950	SERINC2, AC114494.1	ensembl_havana, ensembl	protein_coding, protein_coding	ENST00000373710:c.[912_913delCC]; ENST00000596131:c.[357_358delGG]; ENST00000373709:c.[885_886delCC]; ENST00000536859:c.[897_898delCC]; ENST00000536384:c.[897_898delCC]	ENSP00000362814:p.[His306fs]; ENSP00000473139:p.[Val120fs]; ENSP00000362813:p.[His297fs]; ENSP00000444307:p.[His301fs]; ENSP00000439048:p.[His301fs]	ENSP00000362814:p.His306fs	ENST00000373710:c.912_913delCC	No	Yes
1	31905889^31905890	Insertion	-	G	No	1		Heterozygous	6	11	54.5455	1	2	4	0.333333	36.6667	6	11	5	5	0	0.71408	0.992996	No	1	200	SERINC2	protein_coding	SERINC2	ENSG00000168528	SERINC2	ensembl_havana	protein_coding	ENST00000536859:c.[1101_1102insG]; ENST00000536384:c.[1101_1102insG]; ENST00000373709:c.[1089_1090insG]; ENST00000373710:c.[1116_1117insG]	ENSP00000444307:p.[Gln368fs]; ENSP00000439048:p.[Gln368fs]; ENSP00000362813:p.[Gln364fs]; ENSP00000362814:p.[Gln373fs]	ENSP00000362814:p.Gln373fs	ENST00000373710:c.1116_1117insG	No	Yes
1	32374556^32374557	Insertion	-	T	No	1		Heterozygous	16	558	2.86738	1	2	14	0.125	40.125	16	558	7	6	0	0.0320078	0.061965	Yes	5	200	RP11-84A19.4, PTP4A2	lincRNA, protein_coding	RP11-84A19.4, PTP4A2	ENSG00000269967, ENSG00000184007	RP11-84A19.4, PTP4A2	havana, ensembl_havana	lincRNA, protein_coding	ENST00000356536:c.[194_195insA]; ENST00000602683:c.[325_326insA]; ENST00000470404:c.[*47_*48insA]; ENST00000602725:c.[400_401insA]; ENST00000457805:c.[307_308insA]; ENST00000532001:c.[*299_*300insA]; ENST00000344035:c.[400_401insA]	ENSP00000348932:p.[Lys66fs]; ENSP00000473490:p.[Arg109fs]; ENSP00000473259:p.[Arg134fs]; ENSP00000409260:p.[Arg103fs]; ENSP00000344909:p.[Arg134fs]	ENSP00000344909:p.Arg134fs	ENST00000344035:c.400_401insA	No	Yes
1	32557486	SNV	A	G	No	1		Homozygous	23	24	95.8333	1	13	10	0.434783	34.2174	23	24	16	16		0.999979	1	No	1	200	TMEM39B	protein_coding	TMEM39B	ENSG00000121775	TMEM39B	ensembl_havana	protein_coding	ENST00000441402:c.[562A>G]; ENST00000456834:c.[646A>G]; ENST00000336294:c.[801A>G]; ENST00000427288:c.[456A>G]; ENST00000373634:c.[204A>G]	ENSP00000390889:p.[Thr188Ala]; ENSP00000390057:p.[Thr216Ala]		ENST00000427288:c.456A>G	No	Yes
1	32672908	SNV	T	G	No	1		Homozygous	18	18	100	1	8	10	0.444444	38.1667	18	18	13	13		1	1	No	1	200	IQCC	protein_coding	IQCC	ENSG00000160051	IQCC	ensembl_havana	protein_coding	ENST00000537469:c.[866T>G]; ENST00000291358:c.[626T>G]	ENSP00000442291:p.[Phe289Cys]; ENSP00000291358:p.[Phe209Cys]	ENSP00000442291:p.Phe289Cys	ENST00000537469:c.866T>G	No	Yes
1	32691890^32691891	Insertion	-	T	No	1		Heterozygous	11	571	1.92644	1	3	8	0.272727	38.6364	11	571	8	8	0	0.0825918	0.174483	Yes	6	200	EIF3I	protein_coding	EIF3I	ENSG00000084623	EIF3I	ensembl_havana	protein_coding	ENST00000373586:c.[369_370insT]; ENST00000355082:c.[369_370insT]	ENSP00000362688:p.[Asp126fs]	ENSP00000362688:p.Asp126fs	ENST00000373586:c.369_370insT	No	Yes
1	32797782^32797783	Insertion	-	A	No	1		Heterozygous	11	443	2.48307	1	11	0	0	39.2727	11	443	4	4	0	0.814541	0.194026	Yes	6	200	HDAC1	protein_coding	HDAC1	ENSG00000116478	HDAC1	ensembl_havana	protein_coding	ENST00000373548:c.[1311_1312insA]; ENST00000373541:c.[732_733insA]	ENSP00000362649:p.[Ala440fs]; ENSP00000362642:p.[Ala247fs]	ENSP00000362649:p.Ala440fs	ENST00000373548:c.1311_1312insA	No	Yes
1	33065947	SNV	G	C	No	1		Homozygous	7	7	100	1	2	5	0.285714	38	7	7	4	4		1	1	No	1	200	RP1-27O5.3, ZBTB8A, ZBTB8OS	protein_coding, protein_coding, protein_coding	RP1-27O5.3, ZBTB8A, ZBTB8OS	ENSG00000254553, ENSG00000160062, ENSG00000176261	RP1-27O5.3, ZBTB8A, ZBTB8OS	havana, ensembl_havana, ensembl_havana	protein_coding, protein_coding, protein_coding	ENST00000373510:c.[1253G>C]; ENST00000341885:c.[138C>G]; ENST00000480336:c.[*1372G>C]; ENST00000316459:c.[*49G>C]	ENSP00000362609:p.[Gly418Ala]; ENSP00000343760:p.[His46Gln]	ENSP00000362609:p.Gly418Ala	ENST00000373510:c.1253G>C	No	Yes
1	33233498	SNV	C	T	No	1		Heterozygous	51	90	56.6667	1	25	26	0.490196	35.0196	51	90	26	26	2.91	0.975375	0.990293	No	1	200	KIAA1522	protein_coding	KIAA1522	ENSG00000162522	KIAA1522	ensembl_havana	protein_coding	ENST00000373481:c.[202C>T]; ENST00000401073:c.[346C>T]; ENST00000294521:c.[169C>T]; ENST00000373480:c.[169C>T]	ENSP00000362580:p.[Pro68Ser]; ENSP00000383851:p.[Pro116Ser]; ENSP00000294521:p.[Pro57Ser]; ENSP00000362579:p.[Pro57Ser]	ENSP00000383851:p.Pro116Ser	ENST00000401073:c.346C>T	No	Yes
1	33235651	SNV	A	G	No	1		Homozygous	53	53	100	1	35	18	0.339623	35.9434	53	53	21	21		1	1	No	1	200	KIAA1522	protein_coding	KIAA1522	ENSG00000162522	KIAA1522	ensembl_havana	protein_coding	ENST00000401073:c.[871A>G]; ENST00000373480:c.[694A>G]; ENST00000373481:c.[727A>G]; ENST00000294521:c.[409+1275A>G]	ENSP00000383851:p.[Met291Val]; ENSP00000362579:p.[Met232Val]; ENSP00000362580:p.[Met243Val]	ENSP00000383851:p.Met291Val	ENST00000401073:c.871A>G	No	Yes
1	33237239	SNV	C	T	No	1		Heterozygous	35	59	59.322	1	13	22	0.371429	38.3143	35	59	20	21	0.2	0.977974	1	No	1	200	KIAA1522	protein_coding	KIAA1522	ENSG00000162522	KIAA1522	ensembl_havana	protein_coding	ENST00000401073:c.[2459C>T]; ENST00000373481:c.[2315C>T]; ENST00000373480:c.[2282C>T]; ENST00000294521:c.[410-1227C>T]	ENSP00000383851:p.[Ser820Phe]; ENSP00000362580:p.[Ser772Phe]; ENSP00000362579:p.[Ser761Phe]	ENSP00000383851:p.Ser820Phe	ENST00000401073:c.2459C>T	No	Yes
1	33252628^33252629	Insertion	-	T	No	1		Heterozygous	6	181	3.31492	1	4	2	0.333333	38.3333	6	181	5	5	0	0.0954375	0.893552	Yes	6	200	YARS	protein_coding	YARS	ENSG00000134684	YARS	ensembl_havana	protein_coding	ENST00000373477:c.732_733insA	ENSP00000362576:p.Leu245fs	ENSP00000362576:p.Leu245fs	ENST00000373477:c.732_733insA	No	Yes
1	35250472	SNV	G	C	No	1		Heterozygous	16	27	59.2593	1	10	6	0.375	38.1875	16	27	10	11	2.26	0.882901	0.986581	No	1	200	SMIM12, RP1-34M23.5, GJB3	protein_coding, antisense, protein_coding	SMIM12, RP1-34M23.5, GJB3	ENSG00000163866, ENSG00000255811, ENSG00000188910	SMIM12, RP1-34M23.5, GJB3	ensembl_havana, havana, ensembl_havana	protein_coding, antisense, protein_coding	ENST00000373362:c.[109G>C]; ENST00000373366:c.[109G>C]; ENST00000426886:c.[208-66462C>G]	ENSP00000362460:p.[Val37Leu]; ENSP00000362464:p.[Val37Leu]		ENST00000426886:c.208-66462C>G	No	Yes
1	35250961	SNV	G	A	No	1		Heterozygous	10	30	33.3333	1	4	6	0.4	39	10	30	10	10	0	0.921256	0.982706	No	1	200	SMIM12, RP1-34M23.5, GJB3	protein_coding, antisense, protein_coding	SMIM12, RP1-34M23.5, GJB3	ENSG00000163866, ENSG00000255811, ENSG00000188910	SMIM12, RP1-34M23.5, GJB3	ensembl_havana, havana, ensembl_havana	protein_coding, antisense, protein_coding	ENST00000373362:c.[598G>A]; ENST00000373366:c.[598G>A]; ENST00000426886:c.[208-66951C>T]	ENSP00000362460:p.[Val200Ile]; ENSP00000362464:p.[Val200Ile]		ENST00000426886:c.208-66951C>T	No	Yes
1	35654866^35654867	Insertion	-	T	No	1		Heterozygous	7	528	1.32576	1	0	7	0	39.5714	7	528	4	4	0	0.0975636	0.138186	Yes	7	200	SFPQ	protein_coding	SFPQ	ENSG00000116560	SFPQ	ensembl_havana	protein_coding	ENST00000470472:c.[194_195insA]; ENST00000357214:c.[1532_1533insA]	ENSP00000424440:p.[Asn65fs]; ENSP00000349748:p.[Asn511fs]	ENSP00000349748:p.Asn511fs	ENST00000357214:c.1532_1533insA	No	Yes
1	36225948	SNV	T	C	No	1		Heterozygous	13	23	56.5217	1	4	9	0.307692	38.4615	13	23	10	10	0	0.987183	0.993633	No	1	200	CLSPN	protein_coding	CLSPN	ENSG00000092853	CLSPN	ensembl_havana	protein_coding	ENST00000318121:c.[1574A>G]; ENST00000251195:c.[1574A>G]; ENST00000520551:c.[1574A>G]; ENST00000373220:c.[1574A>G]	ENSP00000312995:p.[Asn525Ser]; ENSP00000251195:p.[Asn525Ser]; ENSP00000428848:p.[Asn525Ser]; ENSP00000362317:p.[Asn525Ser]	ENSP00000251195:p.Asn525Ser	ENST00000251195:c.1574A>G	No	Yes
1	36557619	SNV	G	A	No	1		Homozygous	94	94	100	1	38	56	0.404255	38.5851	94	94	33	32		1	1	No	1	200	ADPRHL2	protein_coding	ADPRHL2	ENSG00000116863	ADPRHL2	ensembl_havana	protein_coding	ENST00000373178:c.625G>A	ENSP00000362273:p.Glu209Lys	ENSP00000362273:p.Glu209Lys	ENST00000373178:c.625G>A	No	Yes
1	38034793..38034794	MNV	TT	GA	No	2		Heterozygous	8	188	4.25532	1	8	0	0	37.625	8	188	5	5	1.08	0.32203	0.216577	No	1	200	GNL2	protein_coding	GNL2	ENSG00000134697	GNL2	ensembl_havana	protein_coding	ENST00000373062:c.1526_1527delAAinsTC	ENSP00000362153:p.Glu509Val	ENSP00000362153:p.Glu509Val	ENST00000373062:c.1526_1527delAAinsTC	No	Yes
1	39908506	SNV	G	A	No	1		Heterozygous	14	26	53.8462	1	7	7	0.5	36.9286	14	26	9	9	0	0.99752	0.999977	No	1	200	MACF1	protein_coding	MACF1	ENSG00000127603	MACF1	ensembl_havana	protein_coding	ENST00000317713:c.[13048G>A]; ENST00000567887:c.[19336G>A]; ENST00000372915:c.[18922G>A]; ENST00000289893:c.[14554G>A]; ENST00000545844:c.[13048G>A]; ENST00000539005:c.[12658G>A]; ENST00000372925:c.[10057G>A]; ENST00000564288:c.[19225G>A]; ENST00000361689:c.[13048G>A]	ENSP00000313438:p.[Ala4350Thr]; ENSP00000455823:p.[Ala6446Thr]; ENSP00000362006:p.[Ala6308Thr]; ENSP00000289893:p.[Ala4852Thr]; ENSP00000439537:p.[Ala4350Thr]; ENSP00000444364:p.[Ala4220Thr]; ENSP00000362016:p.[Ala3353Thr]; ENSP00000455274:p.[Ala6409Thr]; ENSP00000354573:p.[Ala4350Thr]	ENSP00000455274:p.Ala6409Thr	ENST00000564288:c.19225G>A	No	Yes
1	39914363	SNV	G	C	No	1		Heterozygous	44	73	60.274	1	27	17	0.386364	38.9545	44	73	17	17	0	0.988455	1	No	1	200	MACF1	protein_coding	MACF1	ENSG00000127603	MACF1	ensembl_havana	protein_coding	ENST00000361689:c.[14009G>C]; ENST00000289893:c.[15515G>C]; ENST00000567887:c.[20297G>C]; ENST00000545844:c.[14009G>C]; ENST00000564288:c.[20186G>C]; ENST00000372925:c.[11018G>C]; ENST00000317713:c.[14009G>C]; ENST00000372915:c.[19883G>C]; ENST00000539005:c.[13619G>C]	ENSP00000354573:p.[Ser4670Thr]; ENSP00000289893:p.[Ser5172Thr]; ENSP00000455823:p.[Ser6766Thr]; ENSP00000439537:p.[Ser4670Thr]; ENSP00000455274:p.[Ser6729Thr]; ENSP00000362016:p.[Ser3673Thr]; ENSP00000313438:p.[Ser4670Thr]; ENSP00000362006:p.[Ser6628Thr]; ENSP00000444364:p.[Ser4540Thr]	ENSP00000455274:p.Ser6729Thr	ENST00000564288:c.20186G>C	No	Yes
1	40028060	SNV	C	G	No	1		Heterozygous	67	399	16.792	1	41	26	0.38806	34.2537	67	399	32	33	4.55	0.842363	0.983618	No	1	200	PABPC4	protein_coding	PABPC4	ENSG00000090621	PABPC4	ensembl_havana	protein_coding	ENST00000437136:c.[311G>C]; ENST00000372858:c.[1697G>C]; ENST00000372857:c.[1649G>C]; ENST00000372862:c.[1562G>C]; ENST00000372856:c.[1610G>C]; ENST00000421687:c.[1372-8G>C]	ENSP00000408559:p.[Gly104Ala]; ENSP00000361949:p.[Gly566Ala]; ENSP00000361948:p.[Gly550Ala]; ENSP00000361953:p.[Gly521Ala]; ENSP00000361947:p.[Gly537Ala]	ENSP00000361948:p.Gly550Ala	ENST00000372857:c.1649G>C	No	Yes
1	40205859	SNV	C	T	No	1		Heterozygous	29	177	16.3842	1	24	5	0.172414	30.9655	29	177	13	14	0	0.644006	0.999371	No	1	200	PPIE	protein_coding	PPIE	ENSG00000084072	PPIE	ensembl_havana	protein_coding	ENST00000356511:c.[54C>T]; ENST00000475350:c.[37C>T]; ENST00000372830:c.[54C>T]; ENST00000474804:c.[43C>T]; ENST00000495526:c.[46C>T]; ENST00000372835:c.[54C>T]; ENST00000470018:c.[-145C>T]; ENST00000470213:c.[54C>T]; ENST00000324379:c.[54C>T]; ENST00000497370:c.[-145C>T]	ENSP00000434888:p.[Arg13*]; ENSP00000432396:p.[Arg15*]; ENSP00000434989:p.[Arg16*]	ENSP00000434989:p.Arg16*	ENST00000495526:c.46C>T	No	Yes
1	40533266	SNV	T	G	No	1		Homozygous	168	169	99.4083	1	77	91	0.458333	36.3274	168	169	48	46		1	1	No	1	200	CAP1	protein_coding	CAP1	ENSG00000131236	CAP1	ensembl_havana	protein_coding	ENST00000340450:c.[682T>G]; ENST00000414893:c.[238T>G]; ENST00000372792:c.[685T>G]; ENST00000372802:c.[682T>G]; ENST00000372797:c.[685T>G]; ENST00000435719:c.[682T>G]; ENST00000372805:c.[685T>G]; ENST00000372798:c.[682T>G]	ENSP00000344832:p.[Cys228Gly]; ENSP00000398877:p.[Cys80Gly]; ENSP00000361878:p.[Cys229Gly]; ENSP00000361888:p.[Cys228Gly]; ENSP00000361883:p.[Cys229Gly]; ENSP00000412859:p.[Cys228Gly]; ENSP00000361891:p.[Cys229Gly]; ENSP00000361884:p.[Cys228Gly]	ENSP00000361883:p.Cys229Gly	ENST00000372797:c.685T>G	No	Yes
1	40533287	SNV	T	G	No	1		Homozygous	55	56	98.2143	1	15	40	0.272727	32.1455	55	56	22	21		0.999781	1	No	1	200	CAP1	protein_coding	CAP1	ENSG00000131236	CAP1	ensembl_havana	protein_coding	ENST00000414893:c.[259T>G]; ENST00000372792:c.[706T>G]; ENST00000372802:c.[703T>G]; ENST00000340450:c.[703T>G]; ENST00000372797:c.[706T>G]; ENST00000435719:c.[703T>G]; ENST00000372798:c.[703T>G]; ENST00000372805:c.[706T>G]	ENSP00000398877:p.[Cys87Gly]; ENSP00000361878:p.[Cys236Gly]; ENSP00000361888:p.[Cys235Gly]; ENSP00000344832:p.[Cys235Gly]; ENSP00000361883:p.[Cys236Gly]; ENSP00000412859:p.[Cys235Gly]; ENSP00000361884:p.[Cys235Gly]; ENSP00000361891:p.[Cys236Gly]	ENSP00000361883:p.Cys236Gly	ENST00000372797:c.706T>G	No	Yes
1	40533315	SNV	T	G	No	1		Homozygous	30	30	100	1	20	10	0.333333	38.0333	30	30	7	7		1	1	No	1	200	CAP1	protein_coding	CAP1	ENSG00000131236	CAP1	ensembl_havana	protein_coding	ENST00000340450:c.[731T>G]; ENST00000372792:c.[734T>G]; ENST00000372798:c.[731T>G]; ENST00000372805:c.[734T>G]; ENST00000372802:c.[731T>G]; ENST00000435719:c.[731T>G]; ENST00000372797:c.[734T>G]; ENST00000414893:c.[287T>G]	ENSP00000344832:p.[Ile244Ser]; ENSP00000361878:p.[Ile245Ser]; ENSP00000361884:p.[Ile244Ser]; ENSP00000361891:p.[Ile245Ser]; ENSP00000361888:p.[Ile244Ser]; ENSP00000412859:p.[Ile244Ser]; ENSP00000361883:p.[Ile245Ser]; ENSP00000398877:p.[Ile96Ser]	ENSP00000361883:p.Ile245Ser	ENST00000372797:c.734T>G	No	Yes
1	40533320	SNV	T	G	No	1		Homozygous	30	30	100	1	20	10	0.333333	38.0667	30	30	7	7		1	1	No	1	200	CAP1	protein_coding	CAP1	ENSG00000131236	CAP1	ensembl_havana	protein_coding	ENST00000435719:c.[736T>G]; ENST00000372805:c.[739T>G]; ENST00000372797:c.[739T>G]; ENST00000414893:c.[292T>G]; ENST00000372792:c.[739T>G]; ENST00000372802:c.[736T>G]; ENST00000372798:c.[736T>G]; ENST00000340450:c.[736T>G]	ENSP00000412859:p.[Cys246Gly]; ENSP00000361891:p.[Cys247Gly]; ENSP00000361883:p.[Cys247Gly]; ENSP00000398877:p.[Cys98Gly]; ENSP00000361878:p.[Cys247Gly]; ENSP00000361888:p.[Cys246Gly]; ENSP00000361884:p.[Cys246Gly]; ENSP00000344832:p.[Cys246Gly]	ENSP00000361883:p.Cys247Gly	ENST00000372797:c.739T>G	No	Yes
1	40533326	SNV	T	G	No	1		Homozygous	90	90	100	1	53	37	0.411111	37.7222	90	90	12	13		1	1	No	1	200	CAP1	protein_coding	CAP1	ENSG00000131236	CAP1	ensembl_havana	protein_coding	ENST00000372792:c.[745T>G]; ENST00000435719:c.[742T>G]; ENST00000372798:c.[742T>G]; ENST00000372805:c.[745T>G]; ENST00000414893:c.[298T>G]; ENST00000372797:c.[745T>G]; ENST00000340450:c.[742T>G]; ENST00000372802:c.[742T>G]	ENSP00000361878:p.[Tyr249Asp]; ENSP00000412859:p.[Tyr248Asp]; ENSP00000361884:p.[Tyr248Asp]; ENSP00000361891:p.[Tyr249Asp]; ENSP00000398877:p.[Tyr100Asp]; ENSP00000361883:p.[Tyr249Asp]; ENSP00000344832:p.[Tyr248Asp]; ENSP00000361888:p.[Tyr248Asp]	ENSP00000361883:p.Tyr249Asp	ENST00000372797:c.745T>G	No	Yes
1	40533347	SNV	T	G	No	1		Homozygous	183	183	100	1	88	95	0.480874	37.9617	183	183	32	31		1	1	No	1	200	CAP1	protein_coding	CAP1	ENSG00000131236	CAP1	ensembl_havana	protein_coding	ENST00000372805:c.[766T>G]; ENST00000372792:c.[766T>G]; ENST00000372798:c.[763T>G]; ENST00000414893:c.[319T>G]; ENST00000372797:c.[766T>G]; ENST00000435719:c.[763T>G]; ENST00000372802:c.[763T>G]; ENST00000340450:c.[763T>G]	ENSP00000361891:p.[Ser256Ala]; ENSP00000361878:p.[Ser256Ala]; ENSP00000361884:p.[Ser255Ala]; ENSP00000398877:p.[Ser107Ala]; ENSP00000361883:p.[Ser256Ala]; ENSP00000412859:p.[Ser255Ala]; ENSP00000361888:p.[Ser255Ala]; ENSP00000344832:p.[Ser255Ala]	ENSP00000361883:p.Ser256Ala	ENST00000372797:c.766T>G	No	Yes
1	40756542^40756543	Insertion	-	T	No	1		Heterozygous	6	111	5.40541	1	4	2	0.333333	35.6667	6	111	4	4	0	0.355773	0.81922	Yes	9	200	ZMPSTE24	protein_coding	ZMPSTE24	ENSG00000084073	ZMPSTE24	ensembl_havana	protein_coding	ENST00000372759:c.1076_1077insT	ENSP00000361845:p.Leu362fs	ENSP00000361845:p.Leu362fs	ENST00000372759:c.1076_1077insT	No	Yes
1	40980731	SNV	G	T	No	1		Heterozygous	6	12	50	1	2	4	0.333333	35.8333	6	12	5	5	1.42	0.746825	1	No	1	200	EXO5	protein_coding	EXO5	ENSG00000164002	EXO5	ensembl_havana	protein_coding	ENST00000418186:c.[515G>T]; ENST00000372703:c.[515G>T]; ENST00000420209:c.[515G>T]; ENST00000443729:c.[515G>T]; ENST00000419161:c.[515G>T]; ENST00000296380:c.[515G>T]; ENST00000358527:c.[515G>T]	ENSP00000391240:p.[Gly172Val]; ENSP00000361788:p.[Gly172Val]; ENSP00000398437:p.[Gly172Val]; ENSP00000409715:p.[Gly172Val]; ENSP00000392115:p.[Gly172Val]; ENSP00000296380:p.[Gly172Val]; ENSP00000351328:p.[Gly172Val]	ENSP00000361788:p.Gly172Val	ENST00000372703:c.515G>T	No	Yes
1	43148267	SNV	C	G	No	1		Heterozygous	7	179	3.91061	1	0	7	0	35.7143	7	179	3	4	0	1.04727e-12	0.907682	No	1	156.536	YBX1	protein_coding	YBX1	ENSG00000065978	YBX1	ensembl_havana	protein_coding	ENST00000321358:c.[31C>G]; ENST00000332220:c.[31C>G]	ENSP00000361626:p.[Pro11Ala]; ENSP00000405937:p.[Pro11Ala]	ENSP00000361626:p.Pro11Ala	ENST00000321358:c.31C>G	Yes	Yes
1	43161889	SNV	A	T	No	1		Heterozygous	69	1286	5.36547	1	33	36	0.478261	37.3333	69	1286	32	32	0	0.424834	0.963667	No	1	200	YBX1	protein_coding	YBX1	ENSG00000065978	YBX1	ensembl_havana	protein_coding	ENST00000321358:c.[284A>T]; ENST00000436427:c.[431A>T]; ENST00000332220:c.[265-424A>T]	ENSP00000361626:p.[Asn95Ile]; ENSP00000389639:p.[Asn144Ile]	ENSP00000389639:p.Asn144Ile	ENST00000436427:c.431A>T	No	Yes
1	43212431	Deletion	A	-	No	1		Heterozygous	9	46	19.5652	1	7	2	0.222222	34.1111	9	46	4	4		0.0216642	0.568247	Yes	6	200	LEPRE1	protein_coding	LEPRE1	ENSG00000117385	LEPRE1	ensembl_havana	protein_coding	ENST00000296388:c.[2148delT]; ENST00000397054:c.[*73delT]; ENST00000236040:c.[*152delT]	ENSP00000296388:p.Glu719fs		ENST00000236040:c.*152delT	No	Yes
1	44137257	SNV	C	A	No	1		Homozygous	13	13	100	1	6	7	0.461538	36.5385	13	13	11	11		1	1	No	1	200	KDM4A	protein_coding	KDM4A	ENSG00000066135	KDM4A	ensembl_havana	protein_coding	ENST00000372396:c.1445C>A	ENSP00000361473:p.Ala482Glu	ENSP00000361473:p.Ala482Glu	ENST00000372396:c.1445C>A	No	Yes
1	44401384	SNV	A	G	No	1		Heterozygous	8	26	30.7692	1	1	7	0.125	33.75	8	26	5	5	0	0.517824	0.95565	No	1	200	ARTN	protein_coding	ARTN	ENSG00000117407	ARTN	ensembl_havana	protein_coding	ENST00000472435:c.[56A>G]; ENST00000479128:c.[56A>G]; ENST00000471394:c.[56A>G]; ENST00000498139:c.[56A>G]; ENST00000474592:c.[56A>G]; ENST00000372354:c.[56A>G]; ENST00000372359:c.[56A>G]; ENST00000491846:c.[56A>G]; ENST00000477048:c.[56A>G]; ENST00000414809:c.[56A>G]	ENSP00000435140:p.[Gln19Arg]; ENSP00000434071:p.[Gln19Arg]; ENSP00000435804:p.[Gln19Arg]; ENSP00000436727:p.[Gln19Arg]; ENSP00000434856:p.[Gln19Arg]; ENSP00000361429:p.[Gln19Arg]; ENSP00000361434:p.[Gln19Arg]; ENSP00000436149:p.[Gln19Arg]; ENSP00000434784:p.[Gln19Arg]; ENSP00000387435:p.[Gln19Arg]	ENSP00000387435:p.Gln19Arg	ENST00000414809:c.56A>G	No	Yes
1	45244340	SNV	G	A	No	1		Heterozygous	29	2131	1.36086	1	0	29	0	30.1724	29	2131	4	4	6.53	5.84256e-06	0.78956	No	1	200	RPS8	protein_coding	RPS8	ENSG00000142937	RPS8	ensembl_havana	protein_coding	ENST00000396651:c.[610G>A]; ENST00000372209:c.[550G>A]	ENSP00000379888:p.[Ala204Thr]; ENSP00000361283:p.[Ala184Thr]	ENSP00000379888:p.Ala204Thr	ENST00000396651:c.610G>A	No	Yes
1	45469359	SNV	A	G	No	1		Heterozygous	16	49	32.6531	1	16	0	0	18.4375	16	49	9	4	4.4	0.0136873	0.0220777	No	1	200	HECTD3	protein_coding	HECTD3	ENSG00000126107	HECTD3	ensembl_havana	protein_coding	ENST00000372168:c.[1313T>C]; ENST00000372172:c.[2483T>C]	ENSP00000361241:p.[Phe438Ser]; ENSP00000361245:p.[Phe828Ser]	ENSP00000361245:p.Phe828Ser	ENST00000372172:c.2483T>C	No	Yes
1	46476587	SNV	T	G	No	1		Homozygous	27	27	100	1	15	12	0.444444	38.5926	27	27	16	17		1	1	No	1	200	MAST2	protein_coding	MAST2	ENSG00000086015	MAST2	ensembl_havana	protein_coding	ENST00000372009:c.[978+2544T>G]; ENST00000361297:c.[1164T>G]; ENST00000372008:c.[819T>G]	ENSP00000354671:p.[Asp388Glu]; ENSP00000361078:p.[Asp273Glu]	ENSP00000354671:p.Asp388Glu	ENST00000361297:c.1164T>G	No	Yes
1	46493460	SNV	T	G	No	1		Heterozygous	48	91	52.7473	1	20	28	0.416667	38.375	48	91	28	28	0	0.990744	0.957811	No	1	200	MAST2	protein_coding	MAST2	ENSG00000086015	MAST2	ensembl_havana	protein_coding	ENST00000372009:c.[1767T>G]; ENST00000372008:c.[1632T>G]; ENST00000361297:c.[1977T>G]	ENSP00000361079:p.[Ile589Met]; ENSP00000361078:p.[Ile544Met]; ENSP00000354671:p.[Ile659Met]	ENSP00000354671:p.Ile659Met	ENST00000361297:c.1977T>G	No	Yes
1	46521559	SNV	A	T	No	1		Heterozygous	41	79	51.8987	1	11	30	0.268293	38.4146	41	79	24	24	0	0.936394	1	No	1	200	PIK3R3	protein_coding	PIK3R3	ENSG00000117461	PIK3R3	ensembl_havana	protein_coding	ENST00000372006:c.[849T>A]; ENST00000540385:c.[987T>A]; ENST00000354242:c.[764+6042T>A]; ENST00000340332:c.[656+6042T>A]; ENST00000262741:c.[849T>A]; ENST00000423209:c.[764+6042T>A]; ENST00000420542:c.[849T>A]	ENSP00000361075:p.[Asn283Lys]; ENSP00000439913:p.[Asn329Lys]; ENSP00000262741:p.[Asn283Lys]; ENSP00000412546:p.[Asn283Lys]	ENSP00000262741:p.Asn283Lys	ENST00000262741:c.849T>A	No	Yes
1	46655158	SNV	T	C	No	1		Heterozygous	44	100	44	1	13	31	0.295455	37.5	44	100	24	24	0	0.934588	1	No	1	200	POMGNT1	protein_coding	POMGNT1	ENSG00000085998	POMGNT1	ensembl_havana	protein_coding	ENST00000371984:c.[1867A>G]; ENST00000396420:c.[*1536A>G]; ENST00000371992:c.[1867A>G]; ENST00000535522:c.[1801A>G]; ENST00000371986:c.[1867A>G]	ENSP00000361052:p.[Met623Val]; ENSP00000361060:p.[Met623Val]; ENSP00000443767:p.[Met601Val]; ENSP00000361054:p.[Met623Val]		ENST00000396420:c.*1536A>G	No	Yes
1	46660295	SNV	T	C	No	1		Heterozygous	27	67	40.2985	1	7	20	0.259259	37.0741	27	67	18	17	0	0.758736	0.834956	No	1	200	POMGNT1	protein_coding	POMGNT1	ENSG00000085998	POMGNT1	ensembl_havana	protein_coding	ENST00000535522:c.[615A>G]; ENST00000396420:c.[563A>G]; ENST00000371986:c.[681A>G]; ENST00000371984:c.[681A>G]; ENST00000371992:c.[681A>G]	ENSP00000379698:p.[Asn188Ser]	ENSP00000379698:p.Asn188Ser	ENST00000396420:c.563A>G	No	Yes
1	46870761	SNV	C	A	No	1		Homozygous	28	29	96.5517	1	18	10	0.357143	36.8214	28	29	19	19		0.999954	1	No	1	200	FAAH	protein_coding	FAAH	ENSG00000117480	FAAH	ensembl_havana	protein_coding	ENST00000243167:c.385C>A	ENSP00000243167:p.Pro129Thr	ENSP00000243167:p.Pro129Thr	ENST00000243167:c.385C>A	No	Yes
1	47059934	SNV	T	C	No	1		Homozygous	16	16	100	1	1	15	0.0625	37.5	16	16	12	12		1	1	No	1	200	MKNK1	protein_coding	MKNK1	ENSG00000079277	MKNK1	ensembl_havana	protein_coding	ENST00000526513:c.[-116A>G]; ENST00000531769:c.[-116A>G]; ENST00000528077:c.[-116A>G]; ENST00000341183:c.[-116A>G]; ENST00000496619:c.[-116A>G]; ENST00000531355:c.[-116A>G]; ENST00000371945:c.[-116A>G]; ENST00000529170:c.[-116A>G]; ENST00000428112:c.[-116A>G]; ENST00000371946:c.[-116A>G]; ENST00000465783:c.[-116A>G]; ENST00000545730:c.[-116A>G]; ENST00000532110:c.[95A>G]	ENSP00000431985:p.Gln32Arg		ENST00000371946:c.-116A>G	No	Yes
1	47133811	SNV	T	C	No	1		Homozygous	10	10	100	1	0	10	0	27.9	10	10	6	9		1	1	No	1	200	ATPAF1, EFCAB14	protein_coding, protein_coding	ATPAF1, EFCAB14	ENSG00000123472, ENSG00000159658	ATPAF1, EFCAB14	ensembl_havana, ensembl_havana	protein_coding, protein_coding	ENST00000576409:c.[253A>G]; ENST00000487193:c.[40A>G]; ENST00000329231:c.[253A>G]; ENST00000371937:c.[184A>G]; ENST00000574428:c.[184A>G]; ENST00000544071:c.[1121-2775A>G]	ENSP00000460964:p.[Ser85Gly]; ENSP00000433437:p.[Ser14Gly]; ENSP00000330685:p.[Ser85Gly]; ENSP00000361005:p.[Ser62Gly]; ENSP00000459167:p.[Ser62Gly]	ENSP00000460964:p.Ser85Gly	ENST00000576409:c.253A>G	No	Yes
1	47280859	SNV	G	A	No	1		Homozygous	39	39	100	1	12	27	0.307692	37.6667	39	39	23	23		1	1	No	1	200	CYP4B1	protein_coding	CYP4B1	ENSG00000142973	CYP4B1	ensembl_havana	protein_coding	ENST00000271153:c.[993G>A]; ENST00000468637:c.[504G>A]; ENST00000464439:c.[923G>A]; ENST00000371919:c.[951G>A]; ENST00000534708:c.[*542G>A]; ENST00000529715:c.[*703G>A]; ENST00000371923:c.[996G>A]; ENST00000452782:c.[507G>A]	ENSP00000271153:p.[Met331Ile]; ENSP00000437670:p.[Met168Ile]; ENSP00000433068:p.[Trp308*]; ENSP00000360987:p.[Met317Ile]; ENSP00000360991:p.[Met332Ile]; ENSP00000400413:p.[Met169Ile]	ENSP00000271153:p.Met331Ile	ENST00000271153:c.993G>A	No	Yes
1	47767914	SNV	G	A	No	1		Homozygous	9	9	100	1	5	4	0.444444	38.6667	9	9	8	8		1	1	No	1	200	STIL	protein_coding	STIL	ENSG00000123473	STIL	ensembl_havana	protein_coding	ENST00000243182:c.[257C>T]; ENST00000360380:c.[257C>T]; ENST00000371877:c.[257C>T]; ENST00000413565:c.[269C>T]; ENST00000337817:c.[257C>T]; ENST00000447475:c.[257C>T]; ENST00000396221:c.[257C>T]	ENSP00000243182:p.[Ala86Val]; ENSP00000353544:p.[Ala86Val]; ENSP00000360944:p.[Ala86Val]; ENSP00000412019:p.[Ala90Val]; ENSP00000337367:p.[Ala86Val]; ENSP00000411664:p.[Ala86Val]; ENSP00000379523:p.[Ala86Val]	ENSP00000353544:p.Ala86Val	ENST00000360380:c.257C>T	No	Yes
1	47799639	SNV	G	C	No	1		Homozygous	56	56	100	1	54	2	0.0357143	37.8393	56	56	24	25		1	1	No	1	200	CMPK1	protein_coding	CMPK1	ENSG00000162368	CMPK1	ensembl_havana	protein_coding	ENST00000371871:c.[22G>C]; ENST00000471289:c.[22G>C]; ENST00000450808:c.[22G>C]; ENST00000371873:c.[22G>C]	ENSP00000360937:p.[Gly8Arg]; ENSP00000433782:p.[Gly8Arg]; ENSP00000398192:p.[Gly8Arg]; ENSP00000360939:p.[Gly8Arg]	ENSP00000360939:p.Gly8Arg	ENST00000371873:c.22G>C	No	Yes
1	51826921	SNV	T	C	No	1		Homozygous	25	26	96.1538	1	12	13	0.48	37	25	26	15	15		0.999921	1	No	1	200	EPS15	protein_coding	EPS15	ENSG00000085832	EPS15	ensembl_havana	protein_coding	ENST00000396122:c.[1497A>G]; ENST00000371733:c.[2466A>G]; ENST00000371730:c.[2064A>G]	ENSP00000379428:p.[Ile499Met]; ENSP00000360798:p.[Ile822Met]; ENSP00000360795:p.[Ile688Met]	ENSP00000360798:p.Ile822Met	ENST00000371733:c.2466A>G	No	Yes
1	52242561^52242562	Insertion	-	T	No	1		Heterozygous	6	123	4.87805	1	4	2	0.333333	40.5	6	123	5	5	0	0.0469051	0.662683	Yes	6	200	OSBPL9	protein_coding	OSBPL9	ENSG00000117859	OSBPL9	ensembl_havana	protein_coding	ENST00000435274:c.[*1139_*1140insT]; ENST00000531828:c.[732_733insT]; ENST00000486942:c.[693_694insT]; ENST00000495776:c.[*944_*945insT]; ENST00000531061:c.[*166_*167insT]; ENST00000428468:c.[1227_1228insT]; ENST00000447887:c.[1257_1258insT]; ENST00000530544:c.[984_985insT]; ENST00000435686:c.[732_733insT]; ENST00000371714:c.[1188_1189insT]; ENST00000528603:c.[*645_*646insT]; ENST00000453295:c.[1…	ENSP00000433083:p.[Ala247fs]; ENSP00000431980:p.[Ala234fs]; ENSP00000407168:p.[Ala412fs]; ENSP00000412733:p.[Ala422fs]; ENSP00000433675:p.[Ala331fs]; ENSP00000402646:p.[Ala247fs]; ENSP00000360779:p.[Ala399fs]; ENSP00000413263:p.[Ala395fs]; ENSP00000337265:p.[Ala417fs]; ENSP00000360775:p.[Ala430fs]; ENSP00000354970:p.[Ala302fs]; ENSP00000433279:p.[Ala234fs]	ENSP00000360775:p.Ala430fs	ENST00000371710:c.1281_1282insT	No	Yes
1	52344197	SNV	C	T	No	1		Heterozygous	16	36	44.4444	1	5	11	0.3125	38.4375	16	36	10	11	0	0.447	0.993833	No	1	200	NRD1	protein_coding	NRD1	ENSG00000078618	NRD1	ensembl_havana	protein_coding	ENST00000352171:c.[91G>A]; ENST00000544028:c.[-56+137G>A]; ENST00000354831:c.[91G>A]	ENSP00000262679:p.[Glu31Lys]; ENSP00000346890:p.[Glu31Lys]	ENSP00000346890:p.Glu31Lys	ENST00000354831:c.91G>A	No	Yes
1	52498861	SNV	A	T	No	1		Heterozygous	14	22	63.6364	1	6	8	0.428571	38.3571	14	22	9	9	0	0.999204	1	No	1	200	TXNDC12, KTI12	protein_coding, protein_coding	TXNDC12, KTI12	ENSG00000117862, ENSG00000198841	TXNDC12, KTI12	ensembl_havana, ensembl_havana	protein_coding, protein_coding	ENST00000371626:c.[159-4559T>A]; ENST00000371614:c.[573T>A]; ENST00000472624:c.[159-2641T>A]	ENSP00000360676:p.Asp191Glu		ENST00000371626:c.159-4559T>A	No	Yes
1	53158524	SNV	A	C	No	1		Heterozygous	16	33	48.4848	1	0	16	0	32.625	16	33	6	2	2.09	0.00828035	0.0132693	No	1	200	COA7	protein_coding	COA7	ENSG00000162377	COA7	ensembl_havana	protein_coding	ENST00000371538:c.122T>G	ENSP00000360593:p.Val41Gly	ENSP00000360593:p.Val41Gly	ENST00000371538:c.122T>G	No	Yes
1	53792651	SNV	A	C	No	1		Homozygous	8	8	100	1	2	6	0.25	31.125	8	8	8	8		1	1	No	1	200	LRP8	protein_coding	LRP8	ENSG00000157193	LRP8	ensembl_havana	protein_coding	ENST00000306052:c.[138T>G]; ENST00000347547:c.[138T>G]; ENST00000371454:c.[138T>G]; ENST00000480045:c.[138T>G]; ENST00000354412:c.[138T>G]; ENST00000465675:c.[-691T>G]	ENSP00000303634:p.[Asp46Glu]; ENSP00000334522:p.[Asp46Glu]; ENSP00000360509:p.[Asp46Glu]; ENSP00000433554:p.[Asp46Glu]; ENSP00000346391:p.[Asp46Glu]	ENSP00000303634:p.Asp46Glu	ENST00000306052:c.138T>G	No	Yes
1	54690954	SNV	T	C	No	1		Heterozygous	16	22	72.7273	1	9	7	0.4375	39.3125	16	22	13	13	0	0.916545	0.995729	No	1	200	MRPL37	protein_coding	MRPL37	ENSG00000116221	MRPL37	ensembl_havana	protein_coding	ENST00000605337:c.1351T>C	ENSP00000473980:p.Phe451Leu	ENSP00000473980:p.Phe451Leu	ENST00000605337:c.1351T>C	No	Yes
1	55182300	SNV	T	A	No	1		Homozygous	48	49	97.9592	1	30	18	0.375	38	48	49	21	20		1	1	No	1	200	MROH7-TTC4, TTC4	protein_coding, protein_coding	MROH7-TTC4, TTC4	ENSG00000271723, ENSG00000243725	MROH7-TTC4, TTC4	havana, ensembl_havana	protein_coding, protein_coding	ENST00000371281:c.[139T>A]; ENST00000425300:c.[*1915T>A]; ENST00000414150:c.[3846T>A]; ENST00000606515:c.[*1846T>A]	ENSP00000360329:p.[Ser47Thr]; ENSP00000410192:p.[Cys1282*]		ENST00000425300:c.*1915T>A	No	Yes
1	55248120	SNV	T	C	No	1		Heterozygous	10	20	50	1	4	6	0.4	37.2	10	20	8	8	0	0.932911	0.998211	No	1	200	TTC22	protein_coding	TTC22	ENSG00000006555	TTC22	ensembl_havana	protein_coding	ENST00000371276:c.1051A>G	ENSP00000360323:p.Lys351Glu	ENSP00000360323:p.Lys351Glu	ENST00000371276:c.1051A>G	No	Yes
1	55524197	SNV	A	G	No	1		Heterozygous	13	27	48.1481	1	6	7	0.461538	36.6923	13	27	10	9	0.12	0.86977	1	No	1	200	PCSK9	protein_coding	PCSK9	ENSG00000169174	PCSK9	ensembl_havana	protein_coding	ENST00000543384:c.[728A>G]; ENST00000302118:c.[1380A>G]	ENSP00000441859:p.[Tyr243Cys]		ENST00000302118:c.1380A>G	No	Yes
1	55524237	SNV	G	A	No	1		Heterozygous	9	19	47.3684	1	3	6	0.333333	32.3333	9	19	7	7	0.92	0.6925	0.999554	No	1	200	PCSK9	protein_coding	PCSK9	ENSG00000169174	PCSK9	ensembl_havana	protein_coding	ENST00000302118:c.[1420G>A]; ENST00000543384:c.[768G>A]	ENSP00000303208:p.[Val474Ile]	ENSP00000303208:p.Val474Ile	ENST00000302118:c.1420G>A	No	Yes
1	55529187	SNV	G	A	No	1		Homozygous	28	28	100	1	18	10	0.357143	35.6429	28	28	12	12		1	1	No	1	200	PCSK9	protein_coding	PCSK9	ENSG00000169174	PCSK9	ensembl_havana	protein_coding	ENST00000302118:c.2009G>A	ENSP00000303208:p.Gly670Glu	ENSP00000303208:p.Gly670Glu	ENST00000302118:c.2009G>A	No	Yes
1	55562745	SNV	C	A	No	1		Heterozygous	15	22	68.1818	1	9	6	0.4	35.4	15	22	11	11	0.78	0.997157	1	No	1	200	USP24	protein_coding	USP24	ENSG00000162402	USP24	ensembl_havana	protein_coding	ENST00000294383:c.[5816G>T]; ENST00000407756:c.[5336G>T]	ENSP00000294383:p.[Gly1939Val]; ENSP00000385700:p.[Gly1779Val]	ENSP00000294383:p.Gly1939Val	ENST00000294383:c.5816G>T	No	Yes
1	59042181	SNV	G	T	No	1		Homozygous	439	440	99.7727	1	186	253	0.42369	37.7608	439	440	50	57		1	1	No	1	200	TACSTD2	protein_coding	TACSTD2	ENSG00000184292	TACSTD2	ensembl_havana	protein_coding	ENST00000371225:c.648C>A	ENSP00000360269:p.Asp216Glu	ENSP00000360269:p.Asp216Glu	ENST00000371225:c.648C>A	No	Yes
1	60338468	SNV	G	A	No	1		Heterozygous	9	22	40.9091	1	4	5	0.444444	36	9	22	8	8	0	0.83851	0.904969	No	1	200	HOOK1	protein_coding	HOOK1	ENSG00000134709	HOOK1	ensembl_havana	protein_coding	ENST00000371208:c.[2018G>A]; ENST00000395561:c.[1892G>A]	ENSP00000360252:p.[Ser673Asn]; ENSP00000378928:p.[Ser631Asn]	ENSP00000360252:p.Ser673Asn	ENST00000371208:c.2018G>A	No	Yes
1	62330080	SNV	T	G	No	1		Homozygous	6	6	100	1	1	5	0.166667	40	6	6	5	5		1	1	No	1	200	INADL	protein_coding	INADL	ENSG00000132849	INADL	ensembl_havana	protein_coding	ENST00000316485:c.[2610T>G]; ENST00000484937:c.[987T>G]; ENST00000371158:c.[2610T>G]	ENSP00000326199:p.[Ile870Met]; ENSP00000433669:p.[Ile329Met]; ENSP00000360200:p.[Ile870Met]	ENSP00000360200:p.Ile870Met	ENST00000371158:c.2610T>G	No	Yes
1	62393420	SNV	C	T	No	1		Heterozygous	11	25	44	1	9	2	0.181818	36.6364	11	25	10	9	0.14	0.730694	0.999761	No	1	200	INADL	protein_coding	INADL	ENSG00000132849	INADL	ensembl_havana	protein_coding	ENST00000484937:c.[1966C>T]; ENST00000371158:c.[3589C>T]; ENST00000316485:c.[3589C>T]	ENSP00000433669:p.[Pro656Ser]; ENSP00000360200:p.[Pro1197Ser]; ENSP00000326199:p.[Pro1197Ser]	ENSP00000360200:p.Pro1197Ser	ENST00000371158:c.3589C>T	No	Yes
1	62456014	SNV	G	A	No	1		Homozygous	34	34	100	1	21	13	0.382353	35.5588	34	34	20	20		1	1	No	1	200	INADL	protein_coding	INADL	ENSG00000132849	INADL	ensembl_havana	protein_coding	ENST00000543708:c.[197G>A]; ENST00000484937:c.[2222G>A]; ENST00000316485:c.[3845G>A]; ENST00000545929:c.[-45G>A]; ENST00000371158:c.[3845G>A]; ENST00000307297:c.[197G>A]	ENSP00000445790:p.[Arg66His]; ENSP00000433669:p.[Arg741His]; ENSP00000326199:p.[Arg1282His]; ENSP00000360200:p.[Arg1282His]; ENSP00000307496:p.[Arg66His]	ENSP00000360200:p.Arg1282His	ENST00000371158:c.3845G>A	No	Yes
1	62516683	SNV	G	C	No	1		Homozygous	27	27	100	1	9	18	0.333333	39.037	27	27	19	18		1	1	No	1	200	INADL	protein_coding	INADL	ENSG00000132849	INADL	ensembl_havana	protein_coding	ENST00000307297:c.[430G>C]; ENST00000545929:c.[97G>C]; ENST00000371158:c.[4078G>C]; ENST00000484937:c.[2455G>C]; ENST00000316485:c.[4078G>C]; ENST00000543708:c.[430G>C]	ENSP00000307496:p.[Val144Leu]; ENSP00000440094:p.[Val33Leu]; ENSP00000360200:p.[Val1360Leu]; ENSP00000433669:p.[Val819Leu]; ENSP00000326199:p.[Val1360Leu]; ENSP00000445790:p.[Val144Leu]	ENSP00000360200:p.Val1360Leu	ENST00000371158:c.4078G>C	No	Yes
1	63881552	SNV	C	T	No	1		Homozygous	35	35	100	1	6	29	0.171429	39.2	35	35	16	16		1	1	No	1	200	ALG6	protein_coding	ALG6	ENSG00000088035	ALG6	ensembl_havana	protein_coding	ENST00000603108:c.[835C>T]; ENST00000371108:c.[911C>T]; ENST00000263440:c.[917C>T]	ENSP00000360149:p.[Ser304Phe]; ENSP00000263440:p.[Ser306Phe]	ENSP00000360149:p.Ser304Phe	ENST00000371108:c.911C>T	No	Yes
1	63999194	SNV	A	G	No	1		Heterozygous	8	12	66.6667	1	6	2	0.25	38.625	8	12	5	5	0	0.938387	0.95234	No	1	200	ITGB3BP, EFCAB7	protein_coding, protein_coding	ITGB3BP, EFCAB7	ENSG00000142856, ENSG00000203965	ITGB3BP, EFCAB7	ensembl_havana, ensembl_havana	protein_coding, protein_coding	ENST00000371088:c.556A>G	ENSP00000360129:p.Ser186Gly	ENSP00000360129:p.Ser186Gly	ENST00000371088:c.556A>G	No	Yes
1	65270704	SNV	G	T	No	1		Heterozygous	6	8	75	1	1	5	0.166667	35	6	8	4	4	0	0.733271	0.990993	No	1	200	RAVER2	protein_coding	RAVER2	ENSG00000162437	RAVER2	ensembl_havana	protein_coding	ENST00000371072:c.[1288G>T]; ENST00000294428:c.[1327G>T]; ENST00000418058:c.[406G>T]; ENST00000430964:c.[309+1960G>T]	ENSP00000360112:p.[Val430Leu]; ENSP00000294428:p.[Val443Leu]; ENSP00000397069:p.[Val136Leu]	ENSP00000294428:p.Val443Leu	ENST00000294428:c.1327G>T	No	Yes
1	65614154	SNV	T	A	No	1		Heterozygous	20	45	44.4444	1	12	8	0.4	35.65	20	45	13	13	0.36	0.872746	0.890326	No	1	200	AK4	protein_coding	AK4	ENSG00000162433	AK4	ensembl_havana	protein_coding	ENST00000545314:c.[64T>A]; ENST00000395334:c.[64T>A]; ENST00000546702:c.[-12+708T>A]; ENST00000327299:c.[64T>A]	ENSP00000445912:p.[Cys22Ser]; ENSP00000378743:p.[Cys22Ser]; ENSP00000322175:p.[Cys22Ser]	ENSP00000378743:p.Cys22Ser	ENST00000395334:c.64T>A	No	Yes
1	67390416	SNV	G	C	No	1		Homozygous	6	6	100	1	0	6	0	36.8333	6	6	6	6		1	1	No	1	200	WDR78	protein_coding	WDR78	ENSG00000152763	WDR78	ensembl_havana	protein_coding	ENST00000371026:c.[99C>G]; ENST00000532629:c.[87C>G]; ENST00000531980:c.[87C>G]; ENST00000371023:c.[99C>G]; ENST00000431318:c.[-664C>G]; ENST00000371022:c.[99C>G]	ENSP00000360065:p.[Cys33Trp]; ENSP00000432461:p.[Cys29Trp]; ENSP00000436463:p.[Cys29Trp]; ENSP00000360062:p.[Cys33Trp]; ENSP00000360061:p.[Cys33Trp]	ENSP00000360065:p.Cys33Trp	ENST00000371026:c.99C>G	No	Yes
1	77685042	SNV	T	C	No	1		Homozygous	15	15	100	1	2	13	0.133333	33.6	15	15	6	8		1	1	No	1	200	PIGK	protein_coding	PIGK	ENSG00000142892	PIGK	ensembl_havana	protein_coding	ENST00000445065:c.[46A>G]; ENST00000370813:c.[46A>G]; ENST00000370812:c.[46A>G]; ENST00000359130:c.[46A>G]	ENSP00000388854:p.[Thr16Ala]; ENSP00000359849:p.[Thr16Ala]; ENSP00000359848:p.[Thr16Ala]; ENSP00000352041:p.[Thr16Ala]	ENSP00000359848:p.Thr16Ala	ENST00000370812:c.46A>G	No	Yes
1	84944989	SNV	A	G	No	1		Heterozygous	31	73	42.4658	1	31	0	0	39.3226	31	73	13	13	0	0.710757	1	No	1	200	RPF1	protein_coding	RPF1	ENSG00000117133	RPF1	ensembl_havana	protein_coding	ENST00000370656:c.[25A>G]; ENST00000370654:c.[25A>G]	ENSP00000359690:p.[Ser9Gly]; ENSP00000359688:p.[Ser9Gly]	ENSP00000359688:p.Ser9Gly	ENST00000370654:c.25A>G	No	Yes
1	84961108	SNV	G	A	No	1		Heterozygous	36	66	54.5455	1	19	17	0.472222	37.8056	36	66	20	20	0.95	0.929984	0.988628	No	1	200	RPF1	protein_coding	RPF1	ENSG00000117133	RPF1	ensembl_havana	protein_coding	ENST00000370654:c.669G>A	ENSP00000359688:p.Met223Ile	ENSP00000359688:p.Met223Ile	ENST00000370654:c.669G>A	No	Yes
1	85121682..85121684	Deletion	GCT	-	No	3		Heterozygous	7	53	13.2075	1	1	6	0.142857	38.1429	7	53	3	3	0	0.00609582	0.960618	No	1	200	SSX2IP	protein_coding	SSX2IP	ENSG00000117155	SSX2IP	ensembl_havana	protein_coding	ENST00000481102:c.[1220_1222delAGC]; ENST00000342203:c.[1220_1222delAGC]; ENST00000603677:c.[-54-4004_-54-4002delAGC]; ENST00000370612:c.[1220_1222delAGC]; ENST00000605755:c.[1139_1141delAGC]; ENST00000476905:c.[1208_1210delAGC]; ENST00000437941:c.[1139_1141delAGC]	ENSP00000432261:p.[Gln407del]; ENSP00000340279:p.[Gln407del]; ENSP00000359644:p.[Gln407del]; ENSP00000474480:p.[Gln380del]; ENSP00000474925:p.[Gln403del]; ENSP00000412781:p.[Gln380del]	ENSP00000412781:p.Gln380del	ENST00000437941:c.1139_1141delAGC	No	Yes
1	85624549	SNV	C	T	No	1		Homozygous	10	10	100	1	8	2	0.2	36.6	10	10	7	7		1	1	No	1	200	SYDE2	protein_coding	SYDE2	ENSG00000097096	SYDE2	ensembl_havana	protein_coding	ENST00000341460:c.3469G>A	ENSP00000340594:p.Val1157Ile	ENSP00000340594:p.Val1157Ile	ENST00000341460:c.3469G>A	No	Yes
1	89522646	SNV	G	C	No	1		Heterozygous	12	16	75	1	5	7	0.416667	37.4167	12	16	8	8	0	0.890328	1	No	1	200	GBP1	protein_coding	GBP1	ENSG00000117228	GBP1	ensembl_havana	protein_coding	ENST00000370473:c.1046C>G	ENSP00000359504:p.Thr349Ser	ENSP00000359504:p.Thr349Ser	ENST00000370473:c.1046C>G	No	Yes
1	89579941	SNV	T	C	No	1		Heterozygous	10	23	43.4783	1	8	2	0.2	39.1	10	23	8	8	0	0.594614	0.580363	No	1	200	GBP2	protein_coding	GBP2	ENSG00000162645	GBP2	ensembl_havana	protein_coding	ENST00000464839:c.[907A>G]; ENST00000370466:c.[907A>G]	ENSP00000434282:p.[Ser303Gly]; ENSP00000359497:p.[Ser303Gly]	ENSP00000434282:p.Ser303Gly	ENST00000464839:c.907A>G	No	Yes
1	89582690	SNV	G	C	No	1		Heterozygous	20	42	47.619	1	14	6	0.3	38.95	20	42	11	11	0	0.904595	1	No	1	200	GBP2	protein_coding	GBP2	ENSG00000162645	GBP2	ensembl_havana	protein_coding	ENST00000370466:c.[853C>G]; ENST00000464839:c.[853C>G]	ENSP00000359497:p.[Pro285Ala]; ENSP00000434282:p.[Pro285Ala]	ENSP00000434282:p.Pro285Ala	ENST00000464839:c.853C>G	No	Yes
1	93580581	SNV	G	C	No	1		Homozygous	10	10	100	1	6	4	0.4	39.4	10	10	9	9		1	1	No	1	200	MTF2	protein_coding	MTF2	ENSG00000143033	MTF2	ensembl_havana	protein_coding	ENST00000540243:c.[113G>C]; ENST00000370298:c.[419G>C]; ENST00000370303:c.[419G>C]; ENST00000545708:c.[113G>C]	ENSP00000443295:p.[Cys38Ser]; ENSP00000359321:p.[Cys140Ser]; ENSP00000359326:p.[Cys140Ser]; ENSP00000444962:p.[Cys38Ser]	ENSP00000359321:p.Cys140Ser	ENST00000370298:c.419G>C	No	Yes
1	93720070	SNV	C	G	No	1		Heterozygous	6	12	50	1	2	4	0.333333	36.1667	6	12	6	6	0	0.279007	1	No	1	200	CCDC18	protein_coding	CCDC18	ENSG00000122483	CCDC18	ensembl_havana	protein_coding	ENST00000343253:c.[3238C>G]; ENST00000557479:c.[3595C>G]; ENST00000334652:c.[*266C>G]; ENST00000370276:c.[3397C>G]; ENST00000401026:c.[3241C>G]; ENST00000338949:c.[*97C>G]	ENSP00000343377:p.[Leu1080Val]; ENSP00000451099:p.[Leu1199Val]; ENSP00000359299:p.[Leu1133Val]; ENSP00000383808:p.[Leu1081Val]	ENSP00000343377:p.Leu1080Val	ENST00000343253:c.3238C>G	No	Yes
1	93826178	SNV	A	T	No	1		Heterozygous	52	84	61.9048	1	30	22	0.423077	38.0577	52	84	24	25	0.4	0.985062	1	No	1	200	DR1	protein_coding	DR1	ENSG00000117505	DR1	ensembl_havana	protein_coding	ENST00000370272:c.[513A>T]; ENST00000370267:c.[513A>T]	ENSP00000359295:p.[Glu171Asp]; ENSP00000359290:p.[Glu171Asp]	ENSP00000359295:p.Glu171Asp	ENST00000370272:c.513A>T	No	Yes
1	94337776^94337777	Insertion	-	T	No	1		Heterozygous	14	155	9.03226	1	9	5	0.357143	39.2857	14	155	12	12	0	0.636355	0.957635	Yes	6	200	DNTTIP2	protein_coding	DNTTIP2	ENSG00000067334	DNTTIP2	ensembl_havana	protein_coding	ENST00000359208:c.[1779_1780insA]; ENST00000436063:c.[1918_1919insA]	ENSP00000352137:p.[Gln594fs]; ENSP00000411010:p.[Thr640fs]	ENSP00000411010:p.Thr640fs	ENST00000436063:c.1918_1919insA	No	Yes
1	94341210	SNV	C	G	No	1		Heterozygous	76	153	49.6732	1	33	43	0.434211	39.0921	76	153	30	29	0	0.861846	1	No	1	200	DNTTIP2	protein_coding	DNTTIP2	ENSG00000067334	DNTTIP2	ensembl_havana	protein_coding	ENST00000359208:c.[1667+614G>C]; ENST00000436063:c.[1797G>C]	ENSP00000411010:p.Lys599Asn	ENSP00000411010:p.Lys599Asn	ENST00000436063:c.1797G>C	No	Yes
1	94342564	SNV	C	A	No	1		Heterozygous	21	49	42.8571	1	10	11	0.47619	37.8095	21	49	15	15	0	0.889768	0.864243	No	1	200	DNTTIP2	protein_coding	DNTTIP2	ENSG00000067334	DNTTIP2	ensembl_havana	protein_coding	ENST00000359208:c.[927G>T]; ENST00000436063:c.[927G>T]	ENSP00000352137:p.[Glu309Asp]; ENSP00000411010:p.[Glu309Asp]	ENSP00000411010:p.Glu309Asp	ENST00000436063:c.927G>T	No	Yes
1	94639447	SNV	C	T	No	1		Heterozygous	74	135	54.8148	1	32	42	0.432432	37.3108	74	135	27	27	1.96	0.913229	0.998756	No	1	200	ARHGAP29	protein_coding	ARHGAP29	ENSG00000137962	ARHGAP29	ensembl_havana	protein_coding	ENST00000552844:c.[3051+713G>A]; ENST00000260526:c.[3764G>A]	ENSP00000260526:p.Gly1255Asp	ENSP00000260526:p.Gly1255Asp	ENST00000260526:c.3764G>A	No	Yes
1	95005919	SNV	T	C	No	1		Heterozygous	17	38	44.7368	1	1	16	0.0588235	39.0588	17	38	9	9	0	0.650595	0.812762	No	1	200	F3	protein_coding	F3	ENSG00000117525	F3	ensembl_havana	protein_coding	ENST00000334047:c.[106A>G]; ENST00000370207:c.[106A>G]	ENSP00000334145:p.[Thr36Ala]; ENSP00000359226:p.[Thr36Ala]	ENSP00000334145:p.Thr36Ala	ENST00000334047:c.106A>G	No	Yes
1	95709821	SNV	T	C	No	1		Homozygous	17	17	100	1	7	10	0.411765	36.8824	17	17	9	9		1	1	No	1	200	TMEM56-RWDD3, RWDD3, RP11-57H12.5	protein_coding, protein_coding, antisense	TMEM56-RWDD3, RWDD3, RP11-57H12.5	ENSG00000271092, ENSG00000122481, ENSG00000228852	TMEM56-RWDD3, RWDD3, RP11-57H12.5	havana, ensembl_havana, havana	protein_coding, protein_coding, antisense	ENST00000263893:c.[140T>C]; ENST00000604534:c.[*15T>C]; ENST00000370202:c.[140T>C]; ENST00000429514:c.[95T>C]; ENST00000604203:c.[210-2491T>C]	ENSP00000263893:p.[Val47Ala]; ENSP00000359221:p.[Val47Ala]; ENSP00000397398:p.[Val32Ala]	ENSP00000397398:p.Val32Ala	ENST00000429514:c.95T>C	No	Yes
1	95709939	SNV	T	G	No	1		Heterozygous	9	18	50	1	4	5	0.444444	34.2222	9	18	9	9	0.5	0.865152	0.997362	No	1	200	TMEM56-RWDD3, RWDD3, RP11-57H12.5	protein_coding, protein_coding, antisense	TMEM56-RWDD3, RWDD3, RP11-57H12.5	ENSG00000271092, ENSG00000122481, ENSG00000228852	TMEM56-RWDD3, RWDD3, RP11-57H12.5	havana, ensembl_havana, havana	protein_coding, protein_coding, antisense	ENST00000263893:c.[258T>G]; ENST00000429514:c.[213T>G]; ENST00000370202:c.[258T>G]; ENST00000604534:c.[*133T>G]; ENST00000604203:c.[210-2373T>G]	ENSP00000263893:p.[Asn86Lys]; ENSP00000397398:p.[Asn71Lys]; ENSP00000359221:p.[Asn86Lys]	ENSP00000397398:p.Asn71Lys	ENST00000429514:c.213T>G	No	Yes
1	95710252	Deletion	A	-	No	1		Heterozygous	11	40	27.5	1	9	2	0.181818	35.1818	11	40	5	5	3.04	0.267659	0.784973	No	1	200	TMEM56-RWDD3, RWDD3, RP11-57H12.5	protein_coding, protein_coding, antisense	TMEM56-RWDD3, RWDD3, RP11-57H12.5	ENSG00000271092, ENSG00000122481, ENSG00000228852	TMEM56-RWDD3, RWDD3, RP11-57H12.5	havana, ensembl_havana, havana	protein_coding, protein_coding, antisense	ENST00000604534:c.[*446delA]; ENST00000604203:c.[210-2060delA]; ENST00000429514:c.[526delA]; ENST00000263893:c.[571delA]; ENST00000370202:c.[571delA]	ENSP00000397398:p.[Lys176fs]; ENSP00000263893:p.[Lys191fs]; ENSP00000359221:p.[Lys191fs]	ENSP00000397398:p.Lys176fs	ENST00000429514:c.526delA	Yes	Yes
1	98348885	SNV	G	A	No	1		Homozygous	12	12	100	1	3	9	0.25	38.1667	12	12	8	7		1	1	No	1	200	DPYD	protein_coding	DPYD	ENSG00000188641	DPYD	ensembl_havana	protein_coding	ENST00000423006:c.[39+37555C>T]; ENST00000370192:c.[85C>T]; ENST00000306031:c.[85C>T]	ENSP00000359211:p.[Arg29Cys]; ENSP00000307107:p.[Arg29Cys]	ENSP00000359211:p.Arg29Cys	ENST00000370192:c.85C>T	No	Yes
1	100174670	SNV	C	T	No	1		Heterozygous	6	9	66.6667	1	3	3	0.5	37.1667	6	9	5	5	0	0.578105	0.898451	No	1	200	FRRS1	protein_coding	FRRS1	ENSG00000156869	FRRS1	ensembl_havana	protein_coding	ENST00000287474:c.[1665G>A]; ENST00000414213:c.[1693G>A]	ENSP00000287474:p.[Met555Ile]; ENSP00000393884:p.[Ala565Thr]	ENSP00000393884:p.Ala565Thr	ENST00000414213:c.1693G>A	No	Yes
1	100672060	SNV	T	C	No	1		Homozygous	13	13	100	1	4	9	0.307692	38.6154	13	13	9	9		1	1	No	1	200	DBT	protein_coding	DBT	ENSG00000137992	DBT	ensembl_havana	protein_coding	ENST00000370132:c.1150A>G	ENSP00000359151:p.Ser384Gly	ENSP00000359151:p.Ser384Gly	ENST00000370132:c.1150A>G	No	Yes
1	109465166..109465168	Deletion	CTT	-	No	3		Heterozygous	19	101	18.8119	1	19	0	0	37.9474	19	101	8	5	0	0.000155876	0.0766	No	1	200	AKNAD1, GPSM2	protein_coding, protein_coding	AKNAD1, GPSM2	ENSG00000162641, ENSG00000121957	AKNAD1, GPSM2	ensembl_havana, ensembl_havana	protein_coding, protein_coding	ENST00000441735:c.[335_337delCTT]; ENST00000357393:c.[114+40815_114+40817delAAG]; ENST00000264126:c.[1568_1570delCTT]; ENST00000406462:c.[1568_1570delCTT]	ENSP00000390629:p.[Ser114del]; ENSP00000264126:p.[Ser525del]; ENSP00000385510:p.[Ser525del]	ENSP00000385510:p.Ser525del	ENST00000406462:c.1568_1570delCTT	Yes	Yes
1	109465167..109465168	MNV	TT	AA	No	2		Heterozygous	20	101	19.802	1	13	7	0.35	35	20	101	7	7	3.45	0.0561314	0.778079	No	1	200	AKNAD1, GPSM2	protein_coding, protein_coding	AKNAD1, GPSM2	ENSG00000162641, ENSG00000121957	AKNAD1, GPSM2	ensembl_havana, ensembl_havana	protein_coding, protein_coding	ENST00000441735:c.[336_337delTTinsAA]; ENST00000406462:c.[1569_1570delTTinsAA]; ENST00000264126:c.[1569_1570delTTinsAA]; ENST00000357393:c.[114+40815_114+40816delAAinsTT]	ENSP00000390629:p.[Ser113Thr]; ENSP00000385510:p.[Ser524Thr]; ENSP00000264126:p.[Ser524Thr]	ENSP00000385510:p.Ser524Thr	ENST00000406462:c.1569_1570delTTinsAA	Yes	Yes
1	109466858	SNV	G	A	No	1		Heterozygous	9	15	60	1	3	6	0.333333	38	9	15	5	5	1.42	0.967353	1	No	1	200	AKNAD1, GPSM2	protein_coding, protein_coding	AKNAD1, GPSM2	ENSG00000162641, ENSG00000121957	AKNAD1, GPSM2	ensembl_havana, ensembl_havana	protein_coding, protein_coding	ENST00000264126:c.[1815+22G>A]; ENST00000441735:c.[604G>A]; ENST00000357393:c.[114+39125C>T]; ENST00000406462:c.[1815+22G>A]	ENSP00000390629:p.Val202Ile		ENST00000406462:c.1815+22G>A	No	Yes
1	109479978	SNV	G	T	No	1		Heterozygous	24	51	47.0588	1	8	16	0.333333	35.25	24	51	14	14	0	0.749328	0.98406	No	1	200	AKNAD1, CLCC1	protein_coding, protein_coding	AKNAD1, CLCC1	ENSG00000162641, ENSG00000121940	AKNAD1, CLCC1	ensembl_havana, ensembl_havana	protein_coding, protein_coding	ENST00000369970:c.[954C>A]; ENST00000415331:c.[954C>A]; ENST00000357393:c.[114+26005C>A]; ENST00000369969:c.[741C>A]; ENST00000369968:c.[549C>A]; ENST00000348264:c.[549C>A]; ENST00000369976:c.[660-5871C>A]; ENST00000356970:c.[1104C>A]; ENST00000369971:c.[1104C>A]; ENST00000302500:c.[741C>A]	ENSP00000358987:p.[Ser318Arg]; ENSP00000411591:p.[Ser318Arg]; ENSP00000358986:p.[Ser247Arg]; ENSP00000358985:p.[Ser183Arg]; ENSP00000337243:p.[Ser183Arg]; ENSP00000349456:p.[Ser368Arg]; ENSP00000358988:p.[Ser368Arg]; ENSP00000306552:p.[Ser247Arg]	ENSP00000358988:p.Ser368Arg	ENST00000369971:c.1104C>A	No	Yes
1	109704618	SNV	A	G	No	1		Homozygous	27	27	100	1	8	19	0.296296	37.8519	27	27	14	16		1	1	No	1	200	KIAA1324	protein_coding	KIAA1324	ENSG00000116299	KIAA1324	ensembl_havana	protein_coding	ENST00000526264:c.[256A>G]; ENST00000527996:c.[154-2503A>G]; ENST00000533147:c.[256A>G]; ENST00000529753:c.[256A>G]; ENST00000534476:c.[256A>G]; ENST00000369939:c.[256A>G]; ENST00000531664:c.[256A>G]; ENST00000457623:c.[256A>G]	ENSP00000435066:p.[Ile86Val]; ENSP00000431134:p.[Ile86Val]; ENSP00000434595:p.[Ile86Val]; ENSP00000432164:p.[Ile86Val]; ENSP00000358955:p.[Ile86Val]; ENSP00000431349:p.[Ile86Val]; ENSP00000393964:p.[Ile86Val]	ENSP00000358955:p.Ile86Val	ENST00000369939:c.256A>G	No	Yes
1	109735416	SNV	A	C	No	1		Heterozygous	11	46	23.913	1	8	3	0.272727	39.8182	11	46	7	6	0	0.419095	0.927417	No	1	200	KIAA1324	protein_coding	KIAA1324	ENSG00000116299	KIAA1324	ensembl_havana	protein_coding	ENST00000457623:c.[1717A>C]; ENST00000527996:c.[*1557A>C]; ENST00000529753:c.[1606A>C]; ENST00000369939:c.[1867A>C]	ENSP00000393964:p.[Thr573Pro]; ENSP00000434595:p.[Thr536Pro]; ENSP00000358955:p.[Thr623Pro]	ENSP00000358955:p.Thr623Pro	ENST00000369939:c.1867A>C	No	Yes
1	109745618	SNV	T	C	No	1		Homozygous	49	49	100	1	26	23	0.469388	37.1837	49	49	22	22		1	1	No	1	200	KIAA1324	protein_coding	KIAA1324	ENSG00000116299	KIAA1324	ensembl_havana	protein_coding	ENST00000527501:c.[*116T>C]; ENST00000527996:c.[*2747T>C]; ENST00000369939:c.[3026T>C]; ENST00000529753:c.[2765T>C]	ENSP00000358955:p.[Leu1009Pro]; ENSP00000434595:p.[Leu922Pro]	ENSP00000358955:p.Leu1009Pro	ENST00000369939:c.3026T>C	No	Yes
1	109878871^109878872	Insertion	-	T	No	1		Heterozygous	7	90	7.77778	1	3	4	0.428571	39.5714	7	90	4	4	0	0.339297	0.999957	Yes	6	200	SORT1	protein_coding	SORT1	ENSG00000134243	SORT1	ensembl_havana	protein_coding	ENST00000256637:c.[1361_1362insA]; ENST00000538502:c.[950_951insA]	ENSP00000256637:p.[Asn454fs]; ENSP00000438597:p.[Asn317fs]	ENSP00000256637:p.Asn454fs	ENST00000256637:c.1361_1362insA	No	Yes
1	110279701	SNV	C	T	No	1		Heterozygous	42	107	39.2523	1	35	7	0.166667	39.2143	42	107	22	21	0	0.985742	0.980934	No	1	200	GSTM5, RP4-735C1.4, GSTM3	protein_coding, antisense, protein_coding	GSTM5, RP4-735C1.4, GSTM3	ENSG00000134201, ENSG00000241720, ENSG00000134202	GSTM5, RP4-735C1.4, GSTM3	ensembl_havana, havana, ensembl_havana	protein_coding, antisense, protein_coding	ENST00000256594:c.[670G>A]; ENST00000361066:c.[670G>A]; ENST00000540225:c.[670G>A]	ENSP00000256594:p.[Val224Ile]; ENSP00000354357:p.[Val224Ile]; ENSP00000444978:p.[Val224Ile]	ENSP00000444978:p.Val224Ile	ENST00000540225:c.670G>A	No	Yes
1	110279708	SNV	G	T	No	1		Heterozygous	44	82	53.6585	1	44	0	0	16.4773	44	82	11	9	3.98	0.00420592	0.0191182	No	1	200	GSTM5, RP4-735C1.4, GSTM3	protein_coding, antisense, protein_coding	GSTM5, RP4-735C1.4, GSTM3	ENSG00000134201, ENSG00000241720, ENSG00000134202	GSTM5, RP4-735C1.4, GSTM3	ensembl_havana, havana, ensembl_havana	protein_coding, antisense, protein_coding	ENST00000361066:c.[663C>A]; ENST00000256594:c.[663C>A]; ENST00000540225:c.[663C>A]	ENSP00000354357:p.[Asn221Lys]; ENSP00000256594:p.[Asn221Lys]; ENSP00000444978:p.[Asn221Lys]	ENSP00000444978:p.Asn221Lys	ENST00000540225:c.663C>A	No	Yes
1	110466689	SNV	G	C	No	1		Heterozygous	7	15	46.6667	1	5	2	0.285714	39.7143	7	15	6	6	0	0.496908	0.948282	No	1	200	CSF1	protein_coding	CSF1	ENSG00000184371	CSF1	ensembl_havana	protein_coding	ENST00000344188:c.[1098G>C]; ENST00000369802:c.[1446G>C]; ENST00000369801:c.[1098G>C]; ENST00000420111:c.[552G>C]; ENST00000329608:c.[1446G>C]	ENSP00000342718:p.[Glu366Asp]; ENSP00000358817:p.[Glu482Asp]; ENSP00000358816:p.[Glu366Asp]; ENSP00000407317:p.[Glu184Asp]; ENSP00000327513:p.[Glu482Asp]	ENSP00000327513:p.Glu482Asp	ENST00000329608:c.1446G>C	No	Yes
1	110466709	SNV	T	C	No	1		Homozygous	14	14	100	1	9	5	0.357143	38.4286	14	14	10	11		1	1	No	1	200	CSF1	protein_coding	CSF1	ENSG00000184371	CSF1	ensembl_havana	protein_coding	ENST00000369801:c.[1118T>C]; ENST00000369802:c.[1466T>C]; ENST00000329608:c.[1466T>C]; ENST00000420111:c.[572T>C]; ENST00000344188:c.[1118T>C]	ENSP00000358816:p.[Phe373Ser]; ENSP00000358817:p.[Phe489Ser]; ENSP00000327513:p.[Phe489Ser]; ENSP00000407317:p.[Phe191Ser]; ENSP00000342718:p.[Phe373Ser]	ENSP00000327513:p.Phe489Ser	ENST00000329608:c.1466T>C	No	Yes
1	110888948	SNV	G	A	No	1		Heterozygous	25	61	40.9836	1	16	9	0.36	38.68	25	61	20	19	0	0.86214	0.972286	No	1	200	RBM15	protein_coding	RBM15	ENSG00000162775	RBM15	ensembl_havana	protein_coding	ENST00000369784:c.[*59G>A]; ENST00000487146:c.[2882G>A]	ENSP00000473552:p.Arg961Gln		ENST00000369784:c.*59G>A	No	Yes
1	112308953	SNV	T	C	No	1		Homozygous	18	18	100	1	13	5	0.277778	37.7778	18	18	14	14		1	1	No	1	200	DDX20	protein_coding	DDX20	ENSG00000064703	DDX20	ensembl_havana	protein_coding	ENST00000369702:c.[1907T>C]; ENST00000475700:c.[731T>C]	ENSP00000358716:p.[Ile636Thr]; ENSP00000435660:p.[Ile244Thr]	ENSP00000435660:p.Ile244Thr	ENST00000475700:c.731T>C	No	Yes
1	112309123	SNV	C	A	No	1		Heterozygous	14	29	48.2759	1	11	3	0.214286	38.2143	14	29	7	8	0.77	0.784317	0.915379	No	1	200	DDX20	protein_coding	DDX20	ENSG00000064703	DDX20	ensembl_havana	protein_coding	ENST00000369702:c.[2077C>A]; ENST00000475700:c.[901C>A]	ENSP00000358716:p.[Arg693Ser]; ENSP00000435660:p.[Arg301Ser]	ENSP00000435660:p.Arg301Ser	ENST00000475700:c.901C>A	No	Yes
1	112309331	SNV	T	C	No	1		Heterozygous	8	18	44.4444	1	4	4	0.5	39	8	18	8	8	0	0.895111	1	No	1	200	DDX20	protein_coding	DDX20	ENSG00000064703	DDX20	ensembl_havana	protein_coding	ENST00000369702:c.[2285T>C]; ENST00000475700:c.[1109T>C]	ENSP00000358716:p.[Ile762Thr]; ENSP00000435660:p.[Ile370Thr]	ENSP00000435660:p.Ile370Thr	ENST00000475700:c.1109T>C	No	Yes
1	113456546	SNV	A	T	No	1		Heterozygous	6	25	24	1	0	6	0	34.1667	6	25	6	6	0.95	0.396045	0.297548	No	1	200	SLC16A1	protein_coding	SLC16A1	ENSG00000155380	SLC16A1	ensembl_havana	protein_coding	ENST00000369626:c.[1470T>A]; ENST00000538576:c.[1470T>A]	ENSP00000358640:p.[Asp490Glu]; ENSP00000441065:p.[Asp490Glu]	ENSP00000441065:p.Asp490Glu	ENST00000538576:c.1470T>A	No	Yes
1	114438951	SNV	A	G	No	1		Heterozygous	14	23	60.8696	1	7	7	0.5	36.2143	14	23	11	10	0	0.917774	0.81922	No	1	200	AP4B1-AS1, AP4B1	antisense, protein_coding	AP4B1-AS1, AP4B1	ENSG00000226167, ENSG00000134262	AP4B1-AS1, AP4B1	havana, ensembl_havana	antisense, protein_coding	ENST00000369567:c.[935T>C]; ENST00000256658:c.[1439T>C]; ENST00000369569:c.[1439T>C]	ENSP00000358580:p.[Leu312Ser]; ENSP00000256658:p.[Leu480Ser]; ENSP00000358582:p.[Leu480Ser]	ENSP00000358582:p.Leu480Ser	ENST00000369569:c.1439T>C	No	Yes
1	114454061	SNV	C	T	No	1		Heterozygous	7	14	50	1	3	4	0.428571	34.5714	7	14	5	5	1.3	0.834249	0.768166	No	1	200	DCLRE1B	protein_coding	DCLRE1B	ENSG00000118655	DCLRE1B	ensembl_havana	protein_coding	ENST00000369563:c.847C>T	ENSP00000358576:p.Arg283Cys	ENSP00000358576:p.Arg283Cys	ENST00000369563:c.847C>T	No	Yes
1	114948281	SNV	A	G	No	1		Homozygous	27	27	100	1	13	14	0.481481	38.7778	27	27	12	13		1	1	No	1	200	TRIM33	protein_coding	TRIM33	ENSG00000197323	TRIM33	ensembl_havana	protein_coding	ENST00000450349:c.[1415T>C]; ENST00000369543:c.[2519T>C]; ENST00000358465:c.[2519T>C]; ENST00000448034:c.[1799T>C]	ENSP00000412077:p.[Ile472Thr]; ENSP00000358556:p.[Ile840Thr]; ENSP00000351250:p.[Ile840Thr]; ENSP00000402333:p.[Ile600Thr]	ENSP00000351250:p.Ile840Thr	ENST00000358465:c.2519T>C	No	Yes
1	115118336^115118337	Insertion	-	T	No	1		Heterozygous	6	180	3.33333	1	1	5	0.166667	40.1667	6	180	4	4	0	0.12671	0.385256	Yes	7	200	BCAS2	protein_coding	BCAS2	ENSG00000116752	BCAS2	ensembl_havana	protein_coding	ENST00000369541:c.293_294insA	ENSP00000358554:p.Asn98fs	ENSP00000358554:p.Asn98fs	ENST00000369541:c.293_294insA	Yes	Yes
1	116926701^116926702	Insertion	-	A	No	1		Heterozygous	43	588	7.31293	1	29	14	0.325581	39	43	588	21	20	0	8.41632e-06	0.0416003	Yes	6	200	ATP1A1, AL136376.1	protein_coding, protein_coding	ATP1A1, AL136376.1	ENSG00000163399, ENSG00000269279	ATP1A1, AL136376.1	ensembl_havana, ensembl	protein_coding, protein_coding	ENST00000295598:c.[78_79insA]; ENST00000418797:c.[-16_-15insA]; ENST00000598661:c.[17_18insT]; ENST00000537345:c.[78_79insA]; ENST00000369494:c.[-16_-15insA]; ENST00000369496:c.[-16_-15insA]	ENSP00000295598:p.[Asp29fs]; ENSP00000472121:p.[Leu6fs]; ENSP00000445306:p.[Asp29fs]	ENSP00000445306:p.Asp29fs	ENST00000537345:c.78_79insA	No	Yes
1	116936292	SNV	A	G	No	1		Heterozygous	15	963	1.55763	1	1	14	0.0666667	35	15	963	11	11	0.86	0.014766	0.0521231	No	1	200	ATP1A1, ATP1A1OS	protein_coding, processed_transcript	ATP1A1, ATP1A1OS	ENSG00000163399, ENSG00000203865	ATP1A1, ATP1A1OS	ensembl_havana, ensembl_havana	protein_coding, processed_transcript	ENST00000537345:c.[1607A>G]; ENST00000295598:c.[1607A>G]; ENST00000369496:c.[1514A>G]	ENSP00000445306:p.[Asp536Gly]; ENSP00000295598:p.[Asp536Gly]; ENSP00000358508:p.[Asp505Gly]	ENSP00000445306:p.Asp536Gly	ENST00000537345:c.1607A>G	No	Yes
1	116936295	SNV	C	T	No	1		Heterozygous	11	1072	1.02612	1	1	10	0.0909091	36.3636	11	1072	7	7	0.94	0.00101491	0.179172	No	1	139.212	ATP1A1, ATP1A1OS	protein_coding, processed_transcript	ATP1A1, ATP1A1OS	ENSG00000163399, ENSG00000203865	ATP1A1, ATP1A1OS	ensembl_havana, ensembl_havana	protein_coding, processed_transcript	ENST00000369496:c.[1517C>T]; ENST00000295598:c.[1610C>T]; ENST00000537345:c.[1610C>T]	ENSP00000358508:p.[Ala506Val]; ENSP00000295598:p.[Ala537Val]; ENSP00000445306:p.[Ala537Val]	ENSP00000445306:p.Ala537Val	ENST00000537345:c.1610C>T	No	Yes
1	117122130	SNV	T	C	No	1		Homozygous	10	11	90.9091	1	2	8	0.2	36.2	10	11	7	7		0.951146	0.974007	No	1	200	IGSF3	protein_coding	IGSF3	ENSG00000143061	IGSF3	ensembl_havana	protein_coding	ENST00000369483:c.[3278A>G]; ENST00000318837:c.[3278A>G]; ENST00000369486:c.[3218A>G]	ENSP00000358495:p.[Gln1093Arg]; ENSP00000321184:p.[Gln1093Arg]; ENSP00000358498:p.[Gln1073Arg]	ENSP00000358498:p.Gln1073Arg	ENST00000369486:c.3218A>G	No	Yes
1	117487710..117487711	MNV	AT	GA	No	2		Heterozygous	10	19	52.6316	1	7	3	0.3	36.4	10	19	8	8	0	0.768653	0.921711	No	1	200	PTGFRN	protein_coding	PTGFRN	ENSG00000134247	PTGFRN	ensembl_havana	protein_coding	ENST00000393203:c.828_829delATinsGA	ENSP00000376899:p.Ser277Thr	ENSP00000376899:p.Ser277Thr	ENST00000393203:c.828_829delATinsGA	No	Yes
1	117529458	SNV	G	A	No	1		Heterozygous	15	31	48.3871	1	10	5	0.333333	37.0667	15	31	13	12	0	0.822358	0.99534	No	1	200	PTGFRN	protein_coding	PTGFRN	ENSG00000134247	PTGFRN	ensembl_havana	protein_coding	ENST00000393203:c.2509G>A	ENSP00000376899:p.Val837Ile	ENSP00000376899:p.Val837Ile	ENST00000393203:c.2509G>A	No	Yes
1	117617705	SNV	A	G	No	1		Homozygous	7	7	100	1	3	4	0.428571	38.4286	7	7	6	6		1	1	No	1	200	TTF2	protein_coding	TTF2	ENSG00000116830	TTF2	ensembl_havana	protein_coding	ENST00000369466:c.499A>G	ENSP00000358478:p.Lys167Glu	ENSP00000358478:p.Lys167Glu	ENST00000369466:c.499A>G	No	Yes
1	118482149	SNV	C	T	No	1		Heterozygous	14	25	56	1	6	8	0.428571	37.5	14	25	8	8	1.44	0.943943	0.998044	No	1	200	WDR3	protein_coding	WDR3	ENSG00000065183	WDR3	ensembl_havana	protein_coding	ENST00000369441:c.[*516C>T]; ENST00000349139:c.[629C>T]	ENSP00000308179:p.Ala210Val	ENSP00000308179:p.Ala210Val	ENST00000349139:c.629C>T	No	Yes
1	120539781	SNV	G	A	No	1		Heterozygous	33	81	40.7407	1	16	17	0.484848	37.0303	33	81	22	21	0	0.913003	0.938389	No	1	200	NOTCH2	protein_coding	NOTCH2	ENSG00000134250	NOTCH2	ensembl_havana	protein_coding	ENST00000602566:c.[473C>T]; ENST00000256646:c.[590C>T]	ENSP00000473427:p.[Thr158Ile]; ENSP00000256646:p.[Thr197Ile]	ENSP00000256646:p.Thr197Ile	ENST00000256646:c.590C>T	No	Yes
1	120612003..120612004	Deletion	GG	-	No	2		Heterozygous	10	59	16.9492	1	0	10	0	36.6	10	59	5	5	0.84	0.00745705	0.279273	Yes	4	200	NOTCH2	protein_coding	NOTCH2	ENSG00000134250	NOTCH2	ensembl_havana	protein_coding	ENST00000256646:c.17_18delCC	ENSP00000256646:p.Pro6fs	ENSP00000256646:p.Pro6fs	ENST00000256646:c.17_18delCC	Yes	Yes
1	144912153	SNV	A	G	No	1		Homozygous	31	31	100	1	12	19	0.387097	37	31	31	18	17		1	1	No	1	200	PDE4DIP	protein_coding	PDE4DIP	ENSG00000178104	PDE4DIP	ensembl_havana	protein_coding	ENST00000313382:c.[2320T>C]; ENST00000369359:c.[2533T>C]; ENST00000369351:c.[2122T>C]; ENST00000479408:c.[1483T>C]; ENST00000529945:c.[2611T>C]; ENST00000369354:c.[2122T>C]; ENST00000313431:c.[2611T>C]; ENST00000369356:c.[2122T>C]; ENST00000530740:c.[2533T>C]; ENST00000369349:c.[2122T>C]	ENSP00000327209:p.[Cys774Arg]; ENSP00000358366:p.[Cys845Arg]; ENSP00000358357:p.[Cys708Arg]; ENSP00000436791:p.[Cys495Arg]; ENSP00000433392:p.[Cys871Arg]; ENSP00000358360:p.[Cys708Arg]; ENSP00000316434:p.[Cys871Arg]; ENSP00000358363:p.[Cys708Arg]; ENSP00000435654:p.[Cys845Arg]; ENSP00000358355:p.[Cys708Arg]	ENSP00000433392:p.Cys871Arg	ENST00000529945:c.2611T>C	No	Yes
1	145281543	SNV	C	T	No	1		Heterozygous	6	11	54.5455	1	1	5	0.166667	34.5	6	11	6	6	0	0.919889	0.941529	No	1	200	NOTCH2NL, RP11-458D21.5	protein_coding, protein_coding	NOTCH2NL, RP11-458D21.5	ENSG00000213240, ENSG00000255168	NOTCH2NL, RP11-458D21.5	ensembl_havana, havana	protein_coding, protein_coding	ENST00000468030:c.[473C>T]; ENST00000362074:c.[473C>T]; ENST00000344859:c.[473C>T]; ENST00000369340:c.[473C>T]	ENSP00000457682:p.[Thr158Ile]; ENSP00000354929:p.[Thr158Ile]; ENSP00000344557:p.[Thr158Ile]; ENSP00000358346:p.[Thr158Ile]	ENSP00000358346:p.Thr158Ile	ENST00000369340:c.473C>T	No	Yes
1	145298186	SNV	C	G	No	1		Heterozygous	8	13	61.5385	1	1	7	0.125	38.125	8	13	5	5	0	0.834313	0.556051	No	1	200	RP11-458D21.5, NBPF10	protein_coding, protein_coding	RP11-458D21.5, NBPF10	ENSG00000255168, ENSG00000163386	RP11-458D21.5, NBPF10	havana, ensembl_havana	protein_coding, protein_coding	ENST00000369339:c.[176-3534C>G]; ENST00000448873:c.[*303C>G]; ENST00000468030:c.[*705C>G]; ENST00000369338:c.[-35-1544C>G]; ENST00000342960:c.[598C>G]; ENST00000490598:c.[598C>G]; ENST00000464433:c.[*303C>G]	ENSP00000345684:p.[Pro200Ala]; ENSP00000474625:p.[Pro200Ala]	ENSP00000345684:p.Pro200Ala	ENST00000342960:c.598C>G	No	Yes
1	145299824	SNV	C	G	No	1		Heterozygous	7	14	50	1	5	2	0.285714	37.2857	7	14	7	7	0.51	0.622939	1	No	1	200	RP11-458D21.5, NBPF10	protein_coding, protein_coding	RP11-458D21.5, NBPF10	ENSG00000255168, ENSG00000163386	RP11-458D21.5, NBPF10	havana, ensembl_havana	protein_coding, protein_coding	ENST00000490598:c.[873C>G]; ENST00000342960:c.[873C>G]; ENST00000448873:c.[*578C>G]; ENST00000369338:c.[60C>G]; ENST00000468030:c.[*980C>G]; ENST00000464433:c.[*578C>G]; ENST00000369339:c.[176-1896C>G]	ENSP00000474625:p.[Ile291Met]; ENSP00000345684:p.[Ile291Met]; ENSP00000358344:p.[Ile20Met]	ENSP00000345684:p.Ile291Met	ENST00000342960:c.873C>G	No	Yes
1	145360700	SNV	C	T	No	1		Heterozygous	14	56	25	1	7	7	0.5	37.5714	14	56	10	10	1.48	0.296287	0.779086	No	1	200	NBPF10	protein_coding	NBPF10	ENSG00000163386	NBPF10	ensembl_havana	protein_coding	ENST00000448873:c.[*1783+742C>T]; ENST00000605176:c.[2204-2279C>T]; ENST00000369338:c.[1658-3866C>T]; ENST00000369339:c.[1439-2279C>T]; ENST00000342960:c.[9325C>T]; ENST00000490598:c.[*2993C>T]	ENSP00000345684:p.Arg3109Cys	ENSP00000345684:p.Arg3109Cys	ENST00000342960:c.9325C>T	No	Yes
1	145368461	SNV	A	C	No	1		Heterozygous	9	59	15.2542	1	6	3	0.333333	35.2222	9	59	9	9	0	0.433389	1	No	1	200	NBPF10	protein_coding	NBPF10	ENSG00000163386	NBPF10	ensembl_havana	protein_coding	ENST00000342960:c.[10439A>C]; ENST00000605176:c.[2558A>C]; ENST00000369339:c.[1793A>C]; ENST00000369338:c.[1787A>C]	ENSP00000345684:p.[Glu3480Ala]; ENSP00000474856:p.[Glu853Ala]; ENSP00000358345:p.[Glu598Ala]; ENSP00000358344:p.[Glu596Ala]	ENSP00000345684:p.Glu3480Ala	ENST00000342960:c.10439A>C	No	Yes
1	145368524	SNV	A	T	No	1		Heterozygous	8	39	20.5128	1	3	5	0.375	36.375	8	39	7	6	0	0.497719	0.999191	No	1	200	NBPF10	protein_coding	NBPF10	ENSG00000163386	NBPF10	ensembl_havana	protein_coding	ENST00000342960:c.[10502A>T]; ENST00000605176:c.[2621A>T]; ENST00000369339:c.[1856A>T]; ENST00000369338:c.[1850A>T]	ENSP00000345684:p.[Tyr3501Phe]; ENSP00000474856:p.[Tyr874Phe]; ENSP00000358345:p.[Tyr619Phe]; ENSP00000358344:p.[Tyr617Phe]	ENSP00000345684:p.Tyr3501Phe	ENST00000342960:c.10502A>T	No	Yes
1	146465964	SNV	T	G	No	1		Heterozygous	13	25	52	1	4	9	0.307692	35.4615	13	25	8	8	1.1	0.958577	0.994279	No	1	200	NBPF12	protein_coding	NBPF12	ENSG00000186275	NBPF12	ensembl_havana	protein_coding	ENST00000309471:c.[*70T>G]; ENST00000442909:c.[9839T>G]; ENST00000446760:c.[*70T>G]	ENSP00000391116:p.Phe3280Cys	ENSP00000391116:p.Phe3280Cys	ENST00000442909:c.9839T>G	No	Yes
1	146465973	SNV	C	G	No	1		Heterozygous	11	22	50	1	4	7	0.363636	38.4545	11	22	6	6	0	0.97185	1	No	1	200	NBPF12	protein_coding	NBPF12	ENSG00000186275	NBPF12	ensembl_havana	protein_coding	ENST00000442909:c.[9848C>G]; ENST00000309471:c.[*79C>G]; ENST00000446760:c.[*79C>G]	ENSP00000391116:p.Pro3283Arg	ENSP00000391116:p.Pro3283Arg	ENST00000442909:c.9848C>G	No	Yes
1	146466083	SNV	C	T	No	1		Heterozygous	9	16	56.25	1	7	2	0.222222	39.1111	9	16	4	4	0	0.537546	0.999374	No	1	200	NBPF12	protein_coding	NBPF12	ENSG00000186275	NBPF12	ensembl_havana	protein_coding	ENST00000309471:c.[*189C>T]; ENST00000446760:c.[*189C>T]; ENST00000442909:c.[9958C>T]	ENSP00000391116:p.His3320Tyr	ENSP00000391116:p.His3320Tyr	ENST00000442909:c.9958C>T	Yes	Yes
1	146740502	SNV	C	G	No	1		Heterozygous	10	22	45.4545	1	5	5	0.5	38.4	10	22	9	9	0	0.957518	0.999143	No	1	200	CHD1L	protein_coding	CHD1L	ENSG00000131778	CHD1L	ensembl_havana	protein_coding	ENST00000361293:c.[207C>G]; ENST00000369258:c.[1050C>G]; ENST00000369259:c.[438C>G]; ENST00000431239:c.[988+1325C>G]	ENSP00000355100:p.[His69Gln]; ENSP00000358262:p.[His350Gln]; ENSP00000358263:p.[His146Gln]	ENSP00000358262:p.His350Gln	ENST00000369258:c.1050C>G	No	Yes
1	146765392^146765393	Insertion	-	A	No	1		Heterozygous	7	86	8.13953	1	1	6	0.142857	39.4286	7	86	5	5	0	0.0735827	0.517751	Yes	6	200	CHD1L	protein_coding	CHD1L	ENSG00000131778	CHD1L	ensembl_havana	protein_coding	ENST00000369259:c.[1880_1881insA]; ENST00000431239:c.[2210_2211insA]; ENST00000361293:c.[1649_1650insA]; ENST00000369258:c.[2492_2493insA]	ENSP00000358263:p.[Lys630fs]; ENSP00000389031:p.[Lys740fs]; ENSP00000355100:p.[Lys553fs]; ENSP00000358262:p.[Lys834fs]	ENSP00000358262:p.Lys834fs	ENST00000369258:c.2492_2493insA	No	Yes
1	146767149	SNV	G	T	No	1		Homozygous	49	50	98	1	36	13	0.265306	37.8571	49	50	25	24		1	1	No	1	200	CHD1L	protein_coding	CHD1L	ENSG00000131778	CHD1L	ensembl_havana	protein_coding	ENST00000361293:c.[1810G>T]; ENST00000431239:c.[2371G>T]; ENST00000369259:c.[2041G>T]; ENST00000369258:c.[2653G>T]	ENSP00000355100:p.[Ala604Ser]; ENSP00000389031:p.[Ala791Ser]; ENSP00000358263:p.[Ala681Ser]; ENSP00000358262:p.[Ala885Ser]	ENSP00000358262:p.Ala885Ser	ENST00000369258:c.2653G>T	No	Yes
1	147121977	SNV	C	T	No	1		Homozygous	54	54	100	1	27	27	0.5	37.9815	54	54	23	24		1	1	No	1	200	ACP6	protein_coding	ACP6	ENSG00000162836	ACP6	ensembl_havana	protein_coding	ENST00000609196:c.[427G>A]; ENST00000369238:c.[946G>A]	ENSP00000477476:p.[Val143Met]; ENSP00000358241:p.[Val316Met]	ENSP00000358241:p.Val316Met	ENST00000369238:c.946G>A	No	Yes
1	148010911	SNV	G	A	No	1		Heterozygous	11	35	31.4286	1	6	5	0.454545	38.2727	11	35	10	11	0	0.992738	0.992853	No	1	200	NBPF14	protein_coding	NBPF14	ENSG00000122497	NBPF14	ensembl_havana	protein_coding	ENST00000392972:c.[1486+1592C>T]; ENST00000431121:c.[1037-2287C>T]; ENST00000458135:c.[1313+2409C>T]; ENST00000444640:c.[1037-747C>T]; ENST00000310701:c.[1726C>T]; ENST00000369219:c.[1711C>T]; ENST00000448574:c.[1261+3170C>T]; ENST00000436356:c.[1089-2939C>T]	ENSP00000309907:p.[Arg576Cys]; ENSP00000358221:p.[Arg571Cys]	ENSP00000309907:p.Arg576Cys	ENST00000310701:c.1726C>T	No	Yes
1	148592896	SNV	C	G	No	1		Heterozygous	6	97	6.18557	1	1	5	0.166667	40.5	6	97	5	5	0	0.553982	0.809271	No	1	148.754	NBPF15	protein_coding	NBPF15	ENSG00000243452	NBPF15	ensembl_havana	protein_coding	ENST00000369187:c.[1596C>G]; ENST00000442702:c.[1596C>G]	ENSP00000358188:p.[Cys532Trp]; ENSP00000416864:p.[Cys532Trp]	ENSP00000416864:p.Cys532Trp	ENST00000442702:c.1596C>G	No	Yes
1	148594563	SNV	G	T	No	1		Heterozygous	6	59	10.1695	1	1	5	0.166667	36.5	6	59	4	5	0	0.17251	0.413232	No	1	146.993	NBPF15	protein_coding	NBPF15	ENSG00000243452	NBPF15	ensembl_havana	protein_coding	ENST00000369187:c.[1936G>T]; ENST00000442702:c.[1936G>T]	ENSP00000358188:p.[Val646Leu]; ENSP00000416864:p.[Val646Leu]	ENSP00000416864:p.Val646Leu	ENST00000442702:c.1936G>T	No	Yes
1	150199123	SNV	G	T	No	1		Heterozygous	101	186	54.3011	1	37	64	0.366337	31.465	101	186	38	38	2.4	0.835925	0.990438	No	1	200	ANP32E	protein_coding	ANP32E	ENSG00000143401	ANP32E	ensembl_havana	protein_coding	ENST00000533654:c.[332C>A]; ENST00000534220:c.[132C>A]; ENST00000436748:c.[375C>A]; ENST00000369116:c.[102C>A]; ENST00000369115:c.[102C>A]; ENST00000369119:c.[354C>A]; ENST00000314136:c.[498C>A]; ENST00000369114:c.[328-3557C>A]	ENSP00000435215:p.[Ala111Glu]		ENST00000314136:c.498C>A	Yes	Yes
1	150484987	SNV	G	A	No	1		Heterozygous	12	21	57.1429	1	3	9	0.25	37.9167	12	21	7	7	1.39	0.971373	1	No	1	200	ECM1	protein_coding	ECM1	ENSG00000143369	ECM1	ensembl_havana	protein_coding	ENST00000346569:c.[868G>A]; ENST00000369049:c.[1324G>A]; ENST00000369047:c.[1243G>A]	ENSP00000271630:p.[Gly290Ser]; ENSP00000358045:p.[Gly442Ser]; ENSP00000358043:p.[Gly415Ser]	ENSP00000358043:p.Gly415Ser	ENST00000369047:c.1243G>A	No	Yes
1	150727539	SNV	G	A	No	1		Heterozygous	7	10	70	1	5	2	0.285714	36.8571	7	10	5	5	1.49	0.563038	0.790503	No	1	200	CTSS	protein_coding	CTSS	ENSG00000163131	CTSS	ensembl_havana	protein_coding	ENST00000448301:c.[249+2795C>T]; ENST00000368985:c.[337C>T]	ENSP00000357981:p.Arg113Trp	ENSP00000357981:p.Arg113Trp	ENST00000368985:c.337C>T	No	Yes
1	150789864	SNV	A	C	No	1		Heterozygous	9	18	50	1	5	4	0.444444	34.4444	9	18	6	6	0	0.625782	0.997362	No	1	200	ARNT	protein_coding	ARNT	ENSG00000143437	ARNT	ensembl_havana	protein_coding	ENST00000354396:c.[1551T>G]; ENST00000515192:c.[1509T>G]; ENST00000505755:c.[1506T>G]; ENST00000471844:c.[*94+540T>G]; ENST00000358595:c.[1551T>G]	ENSP00000346372:p.[Asp517Glu]; ENSP00000423851:p.[Asp503Glu]; ENSP00000427571:p.[Asp502Glu]; ENSP00000351407:p.[Asp517Glu]	ENSP00000351407:p.Asp517Glu	ENST00000358595:c.1551T>G	No	Yes
1	150970577	SNV	G	T	No	1		Homozygous	23	24	95.8333	1	7	16	0.304348	37.3043	23	24	17	17		0.999988	1	No	1	200	FAM63A	protein_coding	FAM63A	ENSG00000143409	FAM63A	ensembl_havana	protein_coding	ENST00000493834:c.[869C>A]; ENST00000361738:c.[1298C>A]; ENST00000312210:c.[728C>A]; ENST00000361936:c.[1154C>A]; ENST00000497067:c.[68C>A]	ENSP00000437174:p.[Thr290Lys]; ENSP00000354669:p.[Thr433Lys]; ENSP00000310923:p.[Thr243Lys]; ENSP00000354814:p.[Thr385Lys]; ENSP00000451524:p.[Thr23Lys]	ENSP00000354814:p.Thr385Lys	ENST00000361936:c.1154C>A	No	Yes
1	150975108	SNV	T	C	No	1		Homozygous	12	12	100	1	4	8	0.333333	39	12	12	11	11		1	1	No	1	200	FAM63A	protein_coding	FAM63A	ENSG00000143409	FAM63A	ensembl_havana	protein_coding	ENST00000312210:c.[-132-309A>G]; ENST00000361936:c.[-15A>G]; ENST00000493834:c.[-68-232A>G]; ENST00000361738:c.[130A>G]	ENSP00000354669:p.Lys44Glu		ENST00000361936:c.-15A>G	No	Yes
1	151733335	SNV	T	G	No	1		Homozygous	125	127	98.4252	1	70	55	0.44	37.44	125	127	39	41	0	1	1	No	1	200	MRPL9	protein_coding	MRPL9	ENSG00000143436	MRPL9	ensembl_havana	protein_coding	ENST00000368830:c.[629A>C]; ENST00000368829:c.[527A>C]	ENSP00000357823:p.[Glu210Ala]; ENSP00000357822:p.[Glu176Ala]	ENSP00000357823:p.Glu210Ala	ENST00000368830:c.629A>C	No	Yes
1	151735576	SNV	T	C	No	1		Heterozygous	50	142	35.2113	1	25	25	0.5	38.44	50	142	25	25	0	0.965968	0.95142	No	1	200	MRPL9, OAZ3	protein_coding, protein_coding	MRPL9, OAZ3	ENSG00000143436, ENSG00000143450	MRPL9, OAZ3	ensembl_havana, ensembl_havana	protein_coding, protein_coding	ENST00000321531:c.[-36T>C]; ENST00000315067:c.[-36T>C]; ENST00000368829:c.[200A>G]; ENST00000368830:c.[200A>G]	ENSP00000357822:p.[Glu67Gly]; ENSP00000357823:p.[Glu67Gly]	ENSP00000357823:p.Glu67Gly	ENST00000368830:c.200A>G	No	Yes
1	152079989	SNV	T	G	No	1		Heterozygous	14	20	70	1	7	7	0.5	37.5714	14	20	11	11	0	0.922193	0.999371	No	1	200	TCHH	protein_coding	TCHH	ENSG00000159450	TCHH	ensembl_havana	protein_coding	ENST00000368804:c.5704A>C	ENSP00000357794:p.Lys1902Gln	ENSP00000357794:p.Lys1902Gln	ENST00000368804:c.5704A>C	No	Yes
1	152081921	SNV	G	C	No	1		Heterozygous	6	11	54.5455	1	2	4	0.333333	35.3333	6	11	6	6	0	0.71408	0.859614	No	1	200	TCHH	protein_coding	TCHH	ENSG00000159450	TCHH	ensembl_havana	protein_coding	ENST00000368804:c.3772C>G	ENSP00000357794:p.Leu1258Val	ENSP00000357794:p.Leu1258Val	ENST00000368804:c.3772C>G	No	Yes
1	153320372	SNV	T	G	No	1		Homozygous	6	6	100	1	4	2	0.333333	39.1667	6	6	5	5		1	1	No	1	200	PGLYRP4	protein_coding	PGLYRP4	ENSG00000163218	PGLYRP4	ensembl_havana	protein_coding	ENST00000359650:c.[37A>C]; ENST00000368739:c.[37A>C]	ENSP00000352672:p.[Ile13Leu]; ENSP00000357728:p.[Ile13Leu]	ENSP00000357728:p.Ile13Leu	ENST00000368739:c.37A>C	No	Yes
1	153390642	SNV	G	C	No	1		Heterozygous	11	37	29.7297	1	11	0	0	35.9091	11	37	4	4	0.79	0.00505549	0.120711	No	1	200	S100A7A	protein_coding	S100A7A	ENSG00000184330	S100A7A	ensembl_havana	protein_coding	ENST00000368728:c.[84G>C]; ENST00000368729:c.[84G>C]; ENST00000329256:c.[84G>C]	ENSP00000357717:p.[Glu28Asp]; ENSP00000357718:p.[Glu28Asp]; ENSP00000329008:p.[Glu28Asp]	ENSP00000357718:p.Glu28Asp	ENST00000368729:c.84G>C	No	Yes
1	153430282	SNV	T	G	No	1		Heterozygous	282	1382	20.4052	1	281	1	0.0035461	10.6809	282	1382	21	21	19.57	0	0.0316389	No	1	200	S100A7	protein_coding	S100A7	ENSG00000143556	S100A7	ensembl_havana	protein_coding	ENST00000368723:c.[306A>C]; ENST00000368722:c.[306A>C]	ENSP00000357712:p.[*102Cys]; ENSP00000357711:p.[*102Cys]	ENSP00000357712:p.*102Cys	ENST00000368723:c.306A>C	No	Yes
1	154528361	SNV	A	C	No	1		Heterozygous	23	72	31.9444	1	5	18	0.217391	23.7826	23	72	8	4	5.87	0.000206842	0.0218215	No	1	200	UBE2Q1	protein_coding	UBE2Q1	ENSG00000160714	UBE2Q1	ensembl_havana	protein_coding	ENST00000292211:c.407T>G	ENSP00000292211:p.Val136Gly	ENSP00000292211:p.Val136Gly	ENST00000292211:c.407T>G	No	Yes
1	154574820	SNV	T	C	No	1		Homozygous	17	17	100	1	8	9	0.470588	38.0588	17	17	10	10		1	1	No	1	200	ADAR	protein_coding	ADAR	ENSG00000160710	ADAR	ensembl_havana	protein_coding	ENST00000529168:c.[283A>G]; ENST00000292205:c.[427A>G]; ENST00000368471:c.[-588A>G]; ENST00000368474:c.[298A>G]	ENSP00000431794:p.[Arg95Gly]; ENSP00000292205:p.[Arg143Gly]; ENSP00000357459:p.[Arg100Gly]	ENSP00000357459:p.Arg100Gly	ENST00000368474:c.298A>G	No	Yes
1	154901525	SNV	A	G	No	1		Heterozygous	80	170	47.0588	1	39	41	0.4875	37.425	80	170	32	31	0	0.99762	1	No	1	200	PMVK	protein_coding	PMVK	ENSG00000163344	PMVK	ensembl_havana	protein_coding	ENST00000368467:c.287T>C	ENSP00000357452:p.Val96Ala	ENSP00000357452:p.Val96Ala	ENST00000368467:c.287T>C	No	Yes
1	155026942	SNV	A	C	No	1		Homozygous	94	94	100	1	47	47	0.5	37.0957	94	94	37	37		1	1	No	1	200	ADAM15	protein_coding	ADAM15	ENSG00000143537	ADAM15	ensembl_havana	protein_coding	ENST00000449910:c.[572A>C]; ENST00000368412:c.[572A>C]; ENST00000359280:c.[572A>C]; ENST00000356955:c.[572A>C]; ENST00000360674:c.[572A>C]; ENST00000529473:c.[572A>C]; ENST00000368413:c.[277+543A>C]; ENST00000368410:c.[263+973A>C]; ENST00000355956:c.[572A>C]; ENST00000526491:c.[572A>C]; ENST00000271836:c.[572A>C]; ENST00000447332:c.[524A>C]; ENST00000531455:c.[602A>C]	ENSP00000403843:p.[Lys191Thr]; ENSP00000357397:p.[Lys191Thr]; ENSP00000352226:p.[Lys191Thr]; ENSP00000349436:p.[Lys191Thr]; ENSP00000353892:p.[Lys191Thr]; ENSP00000434227:p.[Lys191Thr]; ENSP00000348227:p.[Lys191Thr]; ENSP00000432347:p.[Lys191Thr]; ENSP00000271836:p.[Lys191Thr]; ENSP00000476000:p.[Lys175Thr]; ENSP00000432927:p.[Lys201Thr]	ENSP00000432347:p.Lys191Thr	ENST00000526491:c.572A>C	No	Yes
1	155032752	SNV	A	G	No	1		Heterozygous	57	93	61.2903	1	14	43	0.245614	37.0877	57	93	23	23	0	0.996739	1	No	1	200	ADAM15	protein_coding	ADAM15	ENSG00000143537	ADAM15	ensembl_havana	protein_coding	ENST00000449910:c.[2140A>G]; ENST00000526491:c.[2140A>G]; ENST00000271836:c.[2140A>G]; ENST00000531455:c.[2170A>G]; ENST00000355956:c.[2140A>G]; ENST00000356955:c.[2140A>G]; ENST00000368413:c.[1258A>G]; ENST00000368412:c.[2140A>G]; ENST00000359280:c.[2140A>G]; ENST00000360674:c.[2140A>G]; ENST00000529473:c.[2140A>G]; ENST00000368410:c.[1258A>G]	ENSP00000403843:p.[Ser714Gly]; ENSP00000432347:p.[Ser714Gly]; ENSP00000271836:p.[Ser714Gly]; ENSP00000432927:p.[Ser724Gly]; ENSP00000348227:p.[Ser714Gly]; ENSP00000349436:p.[Ser714Gly]; ENSP00000357398:p.[Ser420Gly]; ENSP00000357397:p.[Ser714Gly]; ENSP00000352226:p.[Ser714Gly]; ENSP00000353892:p.[Ser714Gly]; ENSP00000434227:p.[Ser714Gly]; ENSP00000357395:p.[Ser420Gly]	ENSP00000432347:p.Ser714Gly	ENST00000526491:c.2140A>G	No	Yes
1	155161702	SNV	G	C	No	1		Heterozygous	20	176	11.3636	1	15	5	0.25	36.6	20	176	16	16	1.63	0.087576	0.171676	No	1	200	MUC1	protein_coding	MUC1	ENSG00000185499	MUC1	ensembl_havana	protein_coding	ENST00000457295:c.[186+272C>G]; ENST00000368393:c.[159+272C>G]; ENST00000337604:c.[159+272C>G]; ENST00000368392:c.[186+272C>G]; ENST00000343256:c.[159+272C>G]; ENST00000368396:c.[186+272C>G]; ENST00000368389:c.[159+272C>G]; ENST00000338684:c.[186+272C>G]; ENST00000438413:c.[159+272C>G]; ENST00000368395:c.[431C>G]; ENST00000368390:c.[159+272C>G]; ENST00000368398:c.[159+272C>G]; ENST00000342482:c.[…	ENSP00000357380:p.Thr144Ser	ENSP00000357380:p.Thr144Ser	ENST00000368395:c.431C>G	Yes	Yes
1	155161704	SNV	G	C	No	1		Heterozygous	20	175	11.4286	1	14	6	0.3	35.7	20	175	17	17	0	0.553044	0.396176	No	1	200	MUC1	protein_coding	MUC1	ENSG00000185499	MUC1	ensembl_havana	protein_coding	ENST00000338684:c.[186+270C>G]; ENST00000457295:c.[186+270C>G]; ENST00000368393:c.[159+270C>G]; ENST00000368398:c.[159+270C>G]; ENST00000343256:c.[159+270C>G]; ENST00000342482:c.[186+270C>G]; ENST00000368389:c.[159+270C>G]; ENST00000337604:c.[159+270C>G]; ENST00000438413:c.[159+270C>G]; ENST00000368390:c.[159+270C>G]; ENST00000368396:c.[186+270C>G]; ENST00000368392:c.[186+270C>G]; ENST00000368395…	ENSP00000357380:p.Asp143Glu	ENSP00000357380:p.Asp143Glu	ENST00000368395:c.429C>G	Yes	Yes
1	155161733	SNV	G	C	No	1		Heterozygous	10	126	7.93651	1	3	7	0.3	34.2	10	126	7	7	1.56	0.12094	0.680398	No	1	200	MUC1	protein_coding	MUC1	ENSG00000185499	MUC1	ensembl_havana	protein_coding	ENST00000368389:c.[159+241C>G]; ENST00000368398:c.[159+241C>G]; ENST00000342482:c.[186+241C>G]; ENST00000368395:c.[400C>G]; ENST00000368390:c.[159+241C>G]; ENST00000343256:c.[159+241C>G]; ENST00000368392:c.[186+241C>G]; ENST00000368393:c.[159+241C>G]; ENST00000338684:c.[186+241C>G]; ENST00000438413:c.[159+241C>G]; ENST00000457295:c.[186+241C>G]; ENST00000337604:c.[159+241C>G]; ENST00000368396:c.[…	ENSP00000357380:p.Pro134Ala	ENSP00000357380:p.Pro134Ala	ENST00000368395:c.400C>G	No	Yes
1	155279842	SNV	G	A	No	1		Heterozygous	55	260	21.1538	1	41	14	0.254545	35.0727	55	260	21	19	3.29	0.511726	1	No	1	200	FDPS	protein_coding	FDPS	ENSG00000160752	FDPS	ensembl_havana	protein_coding	ENST00000368356:c.[185G>A]; ENST00000447866:c.[-1-13G>A]; ENST00000356657:c.[185G>A]	ENSP00000357340:p.[Cys62Tyr]; ENSP00000349078:p.[Cys62Tyr]	ENSP00000349078:p.Cys62Tyr	ENST00000356657:c.185G>A	No	Yes
1	155289587..155289588	MNV	TG	AA	No	2		Heterozygous	6	575	1.04348	1	3	3	0.5	36.75	6	575	6	6	0.7	8.67279e-05	0.459128	No	1	200	FDPS, RUSC1-AS1	protein_coding, antisense	FDPS, RUSC1-AS1	ENSG00000160752, ENSG00000225855	FDPS, RUSC1-AS1	ensembl_havana, ensembl_havana	protein_coding, antisense	ENST00000356657:c.[927_928delTGinsAA]; ENST00000447866:c.[729_730delTGinsAA]; ENST00000368356:c.[927_928delTGinsAA]	ENSP00000349078:p.[Asp309_Asp310delinsGluAsn]; ENSP00000391755:p.[Asp243_Asp244delinsGluAsn]; ENSP00000357340:p.[Asp309_Asp310delinsGluAsn]	ENSP00000349078:p.Asp309_Asp310delinsGluAsn	ENST00000356657:c.927_928delTGinsAA	No	Yes
1	155583937	SNV	A	G	No	1		Heterozygous	6	18	33.3333	1	3	3	0.5	37.3333	6	18	6	6	0	0.48437	0.996527	No	1	200	MSTO1, MSTO2P	protein_coding, pseudogene	MSTO1, MSTO2P	ENSG00000125459, ENSG00000203761	MSTO1, MSTO2P	ensembl_havana, ensembl_havana	protein_coding, pseudogene	ENST00000245564:c.[1586A>G]; ENST00000538143:c.[290+3038A>G]; ENST00000490743:c.[*1210A>G]; ENST00000368341:c.[1448A>G]; ENST00000452804:c.[560+2319A>G]	ENSP00000245564:p.[Lys529Arg]; ENSP00000357325:p.[Lys483Arg]	ENSP00000245564:p.Lys529Arg	ENST00000245564:c.1586A>G	No	Yes
1	155707964	SNV	G	A	No	1		Heterozygous	6	436	1.37615	1	1	5	0.166667	37.6667	6	436	5	5	0	0.190148	0.665238	No	1	105.523	MSTO1, MSTO2P, DAP3	protein_coding, pseudogene, protein_coding	MSTO1, MSTO2P, DAP3	ENSG00000125459, ENSG00000203761, ENSG00000132676	MSTO1, MSTO2P, DAP3	ensembl_havana, ensembl_havana, ensembl_havana	protein_coding, pseudogene, protein_coding	ENST00000490249:c.[354G>A]; ENST00000368336:c.[1128G>A]; ENST00000477394:c.[561G>A]; ENST00000471642:c.[1005G>A]; ENST00000343043:c.[1128G>A]; ENST00000463295:c.[249G>A]; ENST00000538143:c.[291-8623G>A]; ENST00000421487:c.[1026G>A]; ENST00000535183:c.[1005G>A]; ENST00000475056:c.[326G>A]; ENST00000491777:c.[69G>A]; ENST00000452804:c.[561-9390G>A]	ENSP00000476624:p.[Gly109Glu]		ENST00000368336:c.1128G>A	Yes	Yes
1	155707964^155707965	Insertion	-	A	No	1		Heterozygous	11	426	2.58216	1	6	5	0.454545	39	11	426	9	9	0	0.0495946	0.583861	Yes	6	200	MSTO1, MSTO2P, DAP3	protein_coding, pseudogene, protein_coding	MSTO1, MSTO2P, DAP3	ENSG00000125459, ENSG00000203761, ENSG00000132676	MSTO1, MSTO2P, DAP3	ensembl_havana, ensembl_havana, ensembl_havana	protein_coding, pseudogene, protein_coding	ENST00000471642:c.[1005_1006insA]; ENST00000463295:c.[249_250insA]; ENST00000477394:c.[561_562insA]; ENST00000452804:c.[561-9390_561-9389insA]; ENST00000475056:c.[326_327insA]; ENST00000368336:c.[1128_1129insA]; ENST00000490249:c.[354_355insA]; ENST00000535183:c.[1005_1006insA]; ENST00000491777:c.[69_70insA]; ENST00000538143:c.[291-8623_291-8622insA]; ENST00000343043:c.[1128_1129insA]; ENST000004…	ENSP00000476592:p.[Glu338fs]; ENSP00000477453:p.[Glu86fs]; ENSP00000476558:p.[Glu190fs]; ENSP00000476624:p.[Ser112fs]; ENSP00000357320:p.[Glu379fs]; ENSP00000477139:p.[Glu121fs]; ENSP00000445003:p.[Glu338fs]; ENSP00000476706:p.[Glu26fs]; ENSP00000341692:p.[Glu379fs]; ENSP00000412605:p.[Glu345fs]	ENSP00000357320:p.Glu379fs	ENST00000368336:c.1128_1129insA	Yes	Yes
1	155735012	SNV	T	C	No	1		Heterozygous	8	11	72.7273	1	4	4	0.5	38.25	8	11	7	7	0	0.551291	0.999942	No	1	200	GON4L	protein_coding	GON4L	ENSG00000116580	GON4L	ensembl_havana	protein_coding	ENST00000368331:c.[4252A>G]; ENST00000271883:c.[4252A>G]; ENST00000437809:c.[4252A>G]; ENST00000361040:c.[4252A>G]	ENSP00000357315:p.[Met1418Val]; ENSP00000271883:p.[Met1418Val]; ENSP00000396117:p.[Met1418Val]; ENSP00000354322:p.[Met1418Val]	ENSP00000396117:p.Met1418Val	ENST00000437809:c.4252A>G	No	Yes
1	156255456	SNV	G	A	No	1		Heterozygous	7	25	28	1	2	5	0.285714	39	7	25	7	7	0	0.639155	0.781211	No	1	200	TMEM79	protein_coding	TMEM79	ENSG00000163472	TMEM79	ensembl_havana	protein_coding	ENST00000357501:c.[41+398G>A]; ENST00000405535:c.[439G>A]; ENST00000456810:c.[41+398G>A]; ENST00000295694:c.[439G>A]	ENSP00000384748:p.[Val147Met]; ENSP00000295694:p.[Val147Met]	ENSP00000384748:p.Val147Met	ENST00000405535:c.439G>A	No	Yes
1	156263940	SNV	T	C	No	1		Heterozygous	16	38	42.1053	1	7	9	0.4375	36.5	16	38	12	12	0	0.989622	1	No	1	200	C1orf85	protein_coding	C1orf85	ENSG00000198715	C1orf85	ensembl_havana	protein_coding	ENST00000368264:c.[409A>G]; ENST00000472870:c.[378+610A>G]; ENST00000476177:c.[*182A>G]; ENST00000362007:c.[667A>G]	ENSP00000357247:p.[Ile137Val]; ENSP00000354553:p.[Ile223Val]	ENSP00000354553:p.Ile223Val	ENST00000362007:c.667A>G	No	Yes
1	156264000	SNV	G	A	No	1		Heterozygous	20	36	55.5556	1	9	11	0.45	35.45	20	36	12	14	0	0.980159	0.989783	No	1	200	C1orf85	protein_coding	C1orf85	ENSG00000198715	C1orf85	ensembl_havana	protein_coding	ENST00000476177:c.[*122C>T]; ENST00000362007:c.[607C>T]; ENST00000472870:c.[378+550C>T]; ENST00000368264:c.[349C>T]	ENSP00000354553:p.[Pro203Ser]; ENSP00000357247:p.[Pro117Ser]	ENSP00000354553:p.Pro203Ser	ENST00000362007:c.607C>T	No	Yes
1	156303074	SNV	C	A	No	1		Homozygous	6	6	100	1	2	4	0.333333	34.6667	6	6	6	6		1	1	No	1	200	CCT3	protein_coding	CCT3	ENSG00000163468	CCT3	ensembl_havana	protein_coding	ENST00000368262:c.[*301+264G>T]; ENST00000295688:c.[304+264G>T]; ENST00000478640:c.[241+264G>T]; ENST00000368259:c.[190+264G>T]; ENST00000446905:c.[262+264G>T]; ENST00000368261:c.[169+264G>T]; ENST00000533194:c.[67+264G>T]; ENST00000496684:c.[304+264G>T]; ENST00000368258:c.[*119+264G>T]; ENST00000413555:c.[376+264G>T]; ENST00000415548:c.[306G>T]; ENST00000472765:c.[169+264G>T]	ENSP00000413431:p.Glu102Asp		ENST00000295688:c.304+264G>T	No	Yes
1	156526444	SNV	T	C	No	1		Homozygous	8	8	100	1	6	2	0.25	38.625	8	8	6	6		1	1	No	1	200	IQGAP3	protein_coding	IQGAP3	ENSG00000183856	IQGAP3	ensembl_havana	protein_coding	ENST00000491900:c.[1042A>G]; ENST00000361170:c.[1171A>G]	ENSP00000436603:p.[Arg348Gly]; ENSP00000354451:p.[Arg391Gly]	ENSP00000354451:p.Arg391Gly	ENST00000361170:c.1171A>G	No	Yes
1	156561651	SNV	G	C	No	1		Homozygous	103	103	100	1	94	9	0.0873786	35.7573	103	103	25	23		1	1	No	1	200	APOA1BP	protein_coding	APOA1BP	ENSG00000163382	APOA1BP	ensembl_havana	protein_coding	ENST00000368235:c.[55G>C]; ENST00000368233:c.[55G>C]; ENST00000368234:c.[55G>C]	ENSP00000357218:p.[Val19Leu]; ENSP00000357216:p.[Val19Leu]; ENSP00000357217:p.[Val19Leu]	ENSP00000357218:p.Val19Leu	ENST00000368235:c.55G>C	No	Yes
1	156563375	SNV	G	A	No	1		Homozygous	9	9	100	1	0	9	0	36.1111	9	9	8	8		1	1	No	1	200	APOA1BP	protein_coding	APOA1BP	ENSG00000163382	APOA1BP	ensembl_havana	protein_coding	ENST00000368235:c.[664+28G>A]; ENST00000368234:c.[608+28G>A]; ENST00000368233:c.[692G>A]	ENSP00000357216:p.Gly231Glu		ENST00000368235:c.664+28G>A	No	Yes
1	156563726	SNV	A	C	No	1		Homozygous	190	190	100	1	90	100	0.473684	37.2421	190	190	40	39		1	1	No	1	200	APOA1BP	protein_coding	APOA1BP	ENSG00000163382	APOA1BP	ensembl_havana	protein_coding	ENST00000368234:c.[661A>C]; ENST00000368235:c.[717A>C]	ENSP00000357217:p.[Ile221Leu]		ENST00000368235:c.717A>C	No	Yes
1	156563741^156563742	Insertion	-	A	No	1		Heterozygous	11	230	4.78261	1	3	8	0.272727	39.5455	11	230	6	7	0	0.131969	0.78846	Yes	6	200	APOA1BP	protein_coding	APOA1BP	ENSG00000163382	APOA1BP	ensembl_havana	protein_coding	ENST00000368234:c.[676_677insA]; ENST00000368235:c.[732_733insA]	ENSP00000357217:p.[Ile228fs]; ENSP00000357218:p.[Ser247fs]	ENSP00000357218:p.Ser247fs	ENST00000368235:c.732_733insA	No	Yes
1	156563813	SNV	G	A	No	1		Heterozygous	42	45	93.3333	1	21	21	0.5	37.1667	42	45	20	21	0	0.962744	1	No	1	200	APOA1BP	protein_coding	APOA1BP	ENSG00000163382	APOA1BP	ensembl_havana	protein_coding	ENST00000368235:c.[804G>A]; ENST00000368234:c.[748G>A]	ENSP00000357217:p.[Glu250Lys]		ENST00000368235:c.804G>A	No	Yes
1	156565049	SNV	A	C	No	1		Heterozygous	10	108	9.25926	1	4	6	0.4	38.6	10	108	5	6	0	0.000331807	0.395141	No	1	200	GPATCH4	protein_coding	GPATCH4	ENSG00000160818	GPATCH4	ensembl_havana	protein_coding	ENST00000438976:c.[1084T>G]; ENST00000368232:c.[1069T>G]	ENSP00000396441:p.[Phe362Val]; ENSP00000357215:p.[Phe357Val]	ENSP00000357215:p.Phe357Val	ENST00000368232:c.1069T>G	Yes	Yes
1	156565049^156565050	Insertion	-	AC	No	2		Heterozygous	59	107	55.1402	1	41	18	0.305085	37.0932	59	107	13	11	0	0.000357203	0.947574	No	1	200	GPATCH4	protein_coding	GPATCH4	ENSG00000160818	GPATCH4	ensembl_havana	protein_coding	ENST00000438976:c.[1083_1084insGT]; ENST00000368232:c.[1068_1069insGT]	ENSP00000396441:p.[Phe362fs]; ENSP00000357215:p.[Phe357fs]	ENSP00000357215:p.Phe357fs	ENST00000368232:c.1068_1069insGT	Yes	Yes
1	156705593	SNV	G	C	No	1		Homozygous	36	36	100	1	23	13	0.361111	38.2222	36	36	15	14		1	1	No	1	200	RRNAD1	protein_coding	RRNAD1	ENSG00000143303	RRNAD1	ensembl_havana	protein_coding	ENST00000368216:c.[1198G>C]; ENST00000476229:c.[344G>C]; ENST00000368218:c.[713G>C]	ENSP00000357199:p.[Val400Leu]; ENSP00000430787:p.[Arg115Pro]; ENSP00000357201:p.[Arg238Pro]	ENSP00000357199:p.Val400Leu	ENST00000368216:c.1198G>C	No	Yes
1	156715103^156715104	Insertion	-	A	No	1		Heterozygous	31	620	5	1	12	19	0.387097	37.4194	31	620	14	15	0	0.00585474	0.286437	Yes	8	200	HDGF	protein_coding	HDGF	ENSG00000143321	HDGF	ensembl_havana	protein_coding	ENST00000537739:c.[149_150insT]; ENST00000368209:c.[128_129insT]; ENST00000416666:c.[53_54insT]; ENST00000357325:c.[149_150insT]; ENST00000368206:c.[197_198insT]	ENSP00000443120:p.[Gly51fs]; ENSP00000357192:p.[Gly44fs]; ENSP00000416752:p.[Gly19fs]; ENSP00000349878:p.[Gly51fs]; ENSP00000357189:p.[Gly67fs]	ENSP00000349878:p.Gly51fs	ENST00000357325:c.149_150insT	No	Yes
1	156907081	SNV	T	C	No	1		Homozygous	21	21	100	1	15	6	0.285714	36.2381	21	21	16	16		1	1	No	1	200	ARHGEF11	protein_coding	ARHGEF11	ENSG00000132694	ARHGEF11	ensembl_havana	protein_coding	ENST00000368194:c.[4400A>G]; ENST00000315174:c.[2528A>G]; ENST00000361409:c.[4280A>G]	ENSP00000357177:p.[His1467Arg]; ENSP00000313470:p.[His843Arg]; ENSP00000354644:p.[His1427Arg]	ENSP00000357177:p.His1467Arg	ENST00000368194:c.4400A>G	No	Yes
1	156907115	SNV	T	C	No	1		Heterozygous	40	60	66.6667	1	33	7	0.175	38.85	40	60	23	17	0	0.97816	0.922476	No	1	200	ARHGEF11	protein_coding	ARHGEF11	ENSG00000132694	ARHGEF11	ensembl_havana	protein_coding	ENST00000315174:c.[2494A>G]; ENST00000361409:c.[4246A>G]; ENST00000368194:c.[4366A>G]	ENSP00000313470:p.[Ser832Gly]; ENSP00000354644:p.[Ser1416Gly]; ENSP00000357177:p.[Ser1456Gly]	ENSP00000357177:p.Ser1456Gly	ENST00000368194:c.4366A>G	No	Yes
1	160062963	SNV	G	A	No	1		Heterozygous	7	23	30.4348	1	2	5	0.285714	32.1429	7	23	6	6	1.51	0.389828	1	No	1	156.536	IGSF8	protein_coding	IGSF8	ENSG00000162729	IGSF8	ensembl_havana	protein_coding	ENST00000368086:c.[1063C>T]; ENST00000314485:c.[1063C>T]	ENSP00000357065:p.[Pro355Ser]; ENSP00000316664:p.[Pro355Ser]	ENSP00000357065:p.Pro355Ser	ENST00000368086:c.1063C>T	No	Yes
1	160281740	SNV	T	C	No	1		Heterozygous	50	104	48.0769	1	18	32	0.36	38.38	50	104	22	22	0	0.942082	0.981953	No	1	200	COPA	protein_coding	COPA	ENSG00000122218	COPA	ensembl_havana	protein_coding	ENST00000241704:c.[994A>G]; ENST00000368069:c.[994A>G]	ENSP00000241704:p.[Met332Val]; ENSP00000357048:p.[Met332Val]	ENSP00000241704:p.Met332Val	ENST00000241704:c.994A>G	No	Yes
1	161088583	SNV	T	G	No	1		Heterozygous	15	31	48.3871	1	12	3	0.2	38.5333	15	31	13	13	0	0.931314	0.974017	No	1	200	NIT1	protein_coding	NIT1	ENSG00000158793	NIT1	ensembl_havana	protein_coding	ENST00000368008:c.[10T>G]; ENST00000368009:c.[10T>G]; ENST00000392190:c.[-99T>G]; ENST00000368007:c.[53+242T>G]	ENSP00000356987:p.[Phe4Val]; ENSP00000356988:p.[Phe4Val]	ENSP00000356987:p.Phe4Val	ENST00000368008:c.10T>G	No	Yes
1	162569070	SNV	A	G	No	1		Heterozygous	35	63	55.5556	1	12	23	0.342857	38.9143	35	63	18	18	0.14	0.967734	1	No	1	200	UAP1	protein_coding	UAP1	ENSG00000117143	UAP1	ensembl_havana	protein_coding	ENST00000367925:c.[1486A>G]; ENST00000271469:c.[1486A>G]; ENST00000367926:c.[1435A>G]; ENST00000367924:c.[1483A>G]	ENSP00000356902:p.[Ser496Gly]; ENSP00000271469:p.[Ser496Gly]; ENSP00000356903:p.[Ser479Gly]; ENSP00000356901:p.[Ser495Gly]	ENSP00000271469:p.Ser496Gly	ENST00000271469:c.1486A>G	No	Yes
1	165619079	SNV	C	T	No	1		Heterozygous	74	205	36.0976	1	71	3	0.0405405	36.5811	74	205	20	21	0.5	0.720358	0.844097	No	1	200	MGST3	protein_coding	MGST3	ENSG00000143198	MGST3	ensembl_havana	protein_coding	ENST00000367884:c.[-6C>T]; ENST00000367889:c.[-6C>T]; ENST00000367883:c.[37C>T]; ENST00000367885:c.[37C>T]; ENST00000367886:c.[37C>T]; ENST00000367888:c.[-6C>T]	ENSP00000356858:p.[Arg13Cys]; ENSP00000356860:p.[Arg13Cys]; ENSP00000356861:p.[Arg13Cys]		ENST00000367889:c.-6C>T	No	Yes
1	165648710	SNV	G	A	No	1		Heterozygous	39	83	46.988	1	25	14	0.358974	35.6923	39	83	19	19	0	0.951914	1	No	1	200	ALDH9A1	protein_coding	ALDH9A1	ENSG00000143149	ALDH9A1	ensembl_havana	protein_coding	ENST00000538148:c.[617C>T]; ENST00000354775:c.[899C>T]	ENSP00000440026:p.[Ala206Val]; ENSP00000346827:p.[Ala300Val]	ENSP00000346827:p.Ala300Val	ENST00000354775:c.899C>T	No	Yes
1	165738078	SNV	C	T	No	1		Heterozygous	25	63	39.6825	1	0	25	0	36.12	25	63	13	14	0	0.857354	1	No	1	200	TMCO1	protein_coding	TMCO1	ENSG00000143183	TMCO1	ensembl_havana	protein_coding	ENST00000367881:c.[64G>A]; ENST00000580248:c.[-182-572G>A]; ENST00000392129:c.[-90G>A]; ENST00000464650:c.[-265G>A]; ENST00000465705:c.[64G>A]; ENST00000476143:c.[46G>A]	ENSP00000356856:p.[Gly22Arg]; ENSP00000463105:p.[Gly22Arg]; ENSP00000464127:p.[Gly16Arg]	ENSP00000356856:p.Gly22Arg	ENST00000367881:c.64G>A	No	Yes
1	167893759	Deletion	G	-	No	1		Heterozygous	12	256	4.6875	1	2	10	0.166667	36.25	12	256	3	3		1.70003e-06	0.280709	Yes	4	200	MPC2	protein_coding	MPC2	ENSG00000143158	MPC2	ensembl_havana	protein_coding	ENST00000367846:c.[126delC]; ENST00000458574:c.[126delC]; ENST00000271373:c.[126delC]	ENSP00000356820:p.[Phe43fs]; ENSP00000392874:p.[Phe43fs]; ENSP00000271373:p.[Phe43fs]	ENSP00000356820:p.Phe43fs	ENST00000367846:c.126delC	No	Yes
1	169768080	SNV	C	A	No	1		Homozygous	20	20	100	1	12	8	0.4	39.15	20	20	11	11		1	1	No	1	200	C1orf112	protein_coding	C1orf112	ENSG00000000460	C1orf112	ensembl_havana	protein_coding	ENST00000359326:c.[-43C>A]; ENST00000456684:c.[132C>A]; ENST00000286031:c.[-43C>A]; ENST00000413811:c.[-41C>A]	ENSP00000415583:p.Asp44Glu		ENST00000286031:c.-43C>A	No	Yes
1	169796197	SNV	T	C	No	1		Heterozygous	9	18	50	1	4	5	0.444444	34.4444	9	18	7	7	1.57	0.967361	0.997362	No	1	200	C1orf112	protein_coding	C1orf112	ENSG00000000460	C1orf112	ensembl_havana	protein_coding	ENST00000413811:c.[767T>C]; ENST00000286031:c.[854T>C]; ENST00000359326:c.[854T>C]	ENSP00000389257:p.[Phe256Ser]; ENSP00000286031:p.[Phe285Ser]; ENSP00000352276:p.[Phe285Ser]	ENSP00000286031:p.Phe285Ser	ENST00000286031:c.854T>C	No	Yes
1	169823718	SNV	T	C	No	1		Homozygous	13	13	100	1	3	10	0.230769	37.3846	13	13	9	9		1	1	No	1	200	SCYL3	protein_coding	SCYL3	ENSG00000000457	SCYL3	ensembl_havana	protein_coding	ENST00000367772:c.[1862A>G]; ENST00000367770:c.[1862A>G]; ENST00000367771:c.[1700A>G]; ENST00000423670:c.[1700A>G]	ENSP00000356746:p.[Gln621Arg]; ENSP00000356744:p.[Gln621Arg]; ENSP00000356745:p.[Gln567Arg]; ENSP00000407993:p.[Gln567Arg]	ENSP00000356745:p.Gln567Arg	ENST00000367771:c.1700A>G	No	Yes
1	170521376	SNV	G	A	No	1		Heterozygous	6	17	35.2941	1	4	2	0.333333	40.3333	6	17	6	6	0	0.857423	0.98505	No	1	200	GORAB	protein_coding	GORAB	ENSG00000120370	GORAB	ensembl_havana	protein_coding	ENST00000367763:c.[958G>A]; ENST00000498166:c.[*877G>A]	ENSP00000356737:p.Glu320Lys		ENST00000498166:c.*877G>A	No	Yes
1	171509327	SNV	G	A	No	1		Homozygous	10	10	100	1	5	5	0.5	30.6	10	10	7	7		1	1	No	1	200	PRRC2C	protein_coding	PRRC2C	ENSG00000117523	PRRC2C	ensembl_havana	protein_coding	ENST00000367742:c.[2722G>A]; ENST00000426496:c.[2716G>A]; ENST00000392078:c.[2722G>A]; ENST00000338920:c.[2716G>A]	ENSP00000356716:p.[Ala908Thr]; ENSP00000410219:p.[Ala906Thr]; ENSP00000375928:p.[Ala908Thr]; ENSP00000343629:p.[Ala906Thr]	ENSP00000356716:p.Ala908Thr	ENST00000367742:c.2722G>A	No	Yes
1	171514731	SNV	C	G	No	1		Homozygous	6	6	100	1	3	3	0.5	36.8333	6	6	6	6		1	1	No	1	200	PRRC2C	protein_coding	PRRC2C	ENSG00000117523	PRRC2C	ensembl_havana	protein_coding	ENST00000426496:c.[4871C>G]; ENST00000367742:c.[4877C>G]; ENST00000338920:c.[4871C>G]; ENST00000392078:c.[4877C>G]; ENST00000495585:c.[512C>G]	ENSP00000410219:p.[Ser1624Cys]; ENSP00000356716:p.[Ser1626Cys]; ENSP00000343629:p.[Ser1624Cys]; ENSP00000375928:p.[Ser1626Cys]; ENSP00000420382:p.[Ser171Cys]	ENSP00000356716:p.Ser1626Cys	ENST00000367742:c.4877C>G	No	Yes
1	173456921^173456922	Insertion	-	A	No	1		Heterozygous	35	434	8.06452	1	25	10	0.285714	37.7429	35	434	20	18	0	0.0105767	0.733778	Yes	6	200	PRDX6	protein_coding	PRDX6	ENSG00000117592	PRDX6	ensembl_havana	protein_coding	ENST00000340385:c.594_595insA	ENSP00000342026:p.Leu201fs	ENSP00000342026:p.Leu201fs	ENST00000340385:c.594_595insA	No	Yes
1	179852074	SNV	T	C	No	1		Heterozygous	8	11	72.7273	1	6	2	0.25	39.125	8	11	7	7	0	0.708641	0.944698	No	1	200	TOR1AIP1	protein_coding	TOR1AIP1	ENSG00000143337	TOR1AIP1	ensembl_havana	protein_coding	ENST00000528443:c.[437T>C]; ENST00000527391:c.[50T>C]; ENST00000606911:c.[437T>C]; ENST00000531630:c.[146T>C]; ENST00000271583:c.[437T>C]; ENST00000435319:c.[74T>C]	ENSP00000435365:p.[Met146Thr]; ENSP00000432717:p.[Met17Thr]; ENSP00000476687:p.[Met146Thr]; ENSP00000434316:p.[Met49Thr]; ENSP00000271583:p.[Met146Thr]; ENSP00000393292:p.[Met25Thr]	ENSP00000476687:p.Met146Thr	ENST00000606911:c.437T>C	No	Yes
1	179876988	SNV	C	G	No	1		Heterozygous	17	36	47.2222	1	10	7	0.411765	38.6471	17	36	10	10	0	0.792348	0.809095	No	1	200	TOR1AIP1	protein_coding	TOR1AIP1	ENSG00000143337	TOR1AIP1	ensembl_havana	protein_coding	ENST00000527391:c.[455C>G]; ENST00000447964:c.[86C>G]; ENST00000435319:c.[464C>G]; ENST00000528443:c.[830C>G]; ENST00000531630:c.[494C>G]; ENST00000606911:c.[827C>G]; ENST00000271583:c.[830C>G]	ENSP00000432717:p.[Pro152Arg]; ENSP00000393613:p.[Pro29Arg]; ENSP00000393292:p.[Pro155Arg]; ENSP00000435365:p.[Pro277Arg]; ENSP00000434316:p.[Pro165Arg]; ENSP00000476687:p.[Pro276Arg]; ENSP00000271583:p.[Pro277Arg]	ENSP00000476687:p.Pro276Arg	ENST00000606911:c.827C>G	No	Yes
1	180135701	SNV	A	G	No	1		Heterozygous	32	68	47.0588	1	18	14	0.4375	36.9688	32	68	22	22	0	0.983072	1	No	1	200	QSOX1	protein_coding	QSOX1	ENSG00000116260	QSOX1	ensembl_havana	protein_coding	ENST00000367600:c.[341A>G]; ENST00000392029:c.[341A>G]; ENST00000367602:c.[341A>G]	ENSP00000356572:p.[Asn114Ser]; ENSP00000375883:p.[Asn114Ser]; ENSP00000356574:p.[Asn114Ser]	ENSP00000356574:p.Asn114Ser	ENST00000367602:c.341A>G	No	Yes
1	180165742	SNV	G	C	No	1		Heterozygous	18	36	50	1	9	9	0.5	32.0556	18	36	13	13	1.15	0.777029	0.691565	No	1	200	QSOX1	protein_coding	QSOX1	ENSG00000116260	QSOX1	ensembl_havana	protein_coding	ENST00000367602:c.[1814G>C]; ENST00000367600:c.[1806+8G>C]	ENSP00000356574:p.Arg605Pro	ENSP00000356574:p.Arg605Pro	ENST00000367602:c.1814G>C	No	Yes
1	183094547	SNV	T	C	No	1		Heterozygous	7	11	63.6364	1	5	2	0.285714	40.2857	7	11	6	5	0	0.710647	1	No	1	200	LAMC1	protein_coding	LAMC1	ENSG00000135862	LAMC1	ensembl_havana	protein_coding	ENST00000258341:c.2663T>C	ENSP00000258341:p.Leu888Pro	ENSP00000258341:p.Leu888Pro	ENST00000258341:c.2663T>C	No	Yes
1	184020945	SNV	G	A	No	1		Heterozygous	7	24	29.1667	1	7	0	0	30.8571	7	24	7	7	1.1	0.986495	0.882936	No	1	200	TSEN15	protein_coding	TSEN15	ENSG00000198860	TSEN15	ensembl_havana	protein_coding	ENST00000533373:c.[56G>A]; ENST00000423085:c.[56G>A]; ENST00000462677:c.[50G>A]; ENST00000361641:c.[56G>A]; ENST00000485209:c.[56G>A]	ENSP00000436996:p.[Gly19Asp]; ENSP00000402002:p.[Gly19Asp]; ENSP00000432397:p.[Gly17Asp]; ENSP00000355299:p.[Gly19Asp]; ENSP00000435144:p.[Gly19Asp]	ENSP00000355299:p.Gly19Asp	ENST00000361641:c.56G>A	No	Yes
1	184023529	SNV	A	C	No	1		Heterozygous	41	77	53.2468	1	15	26	0.365854	37.2683	41	77	27	27	0	0.966748	0.780728	No	1	200	TSEN15	protein_coding	TSEN15	ENSG00000198860	TSEN15	ensembl_havana	protein_coding	ENST00000423085:c.[177A>C]; ENST00000533373:c.[177A>C]; ENST00000462677:c.[171A>C]; ENST00000485209:c.[177A>C]; ENST00000361641:c.[177A>C]	ENSP00000402002:p.[Gln59His]; ENSP00000436996:p.[Gln59His]; ENSP00000432397:p.[Gln57His]; ENSP00000435144:p.[Gln59His]; ENSP00000355299:p.[Gln59His]	ENSP00000355299:p.Gln59His	ENST00000361641:c.177A>C	No	Yes
1	184765072	SNV	A	G	No	1		Homozygous	8	8	100	1	6	2	0.25	37.5	8	8	6	6		1	1	No	1	200	FAM129A	protein_coding	FAM129A	ENSG00000135842	FAM129A	ensembl_havana	protein_coding	ENST00000417056:c.[259+2141T>C]; ENST00000367511:c.[1826T>C]	ENSP00000356481:p.Leu609Pro	ENSP00000356481:p.Leu609Pro	ENST00000367511:c.1826T>C	No	Yes
1	193066819^193066820	Insertion	-	T	No	1		Heterozygous	15	225	6.66667	1	6	9	0.4	37.4667	15	225	13	11	0	0.000513972	0.875112	Yes	6	200	GLRX2	protein_coding	GLRX2	ENSG00000023572	GLRX2	ensembl_havana	protein_coding	ENST00000367440:c.[257_258insA]; ENST00000367439:c.[254_255insA]	ENSP00000356410:p.[Leu87fs]; ENSP00000356409:p.[Leu86fs]	ENSP00000356410:p.Leu87fs	ENST00000367440:c.257_258insA	No	Yes
1	197070442	SNV	G	T	No	1		Heterozygous	6	25	24	1	3	3	0.5	39.6667	6	25	6	6	0	0.903651	0.961519	No	1	200	ASPM	protein_coding	ASPM	ENSG00000066279	ASPM	ensembl_havana	protein_coding	ENST00000367408:c.[1816-5148C>A]; ENST00000294732:c.[4066-5148C>A]; ENST00000367409:c.[7939C>A]	ENSP00000356379:p.Leu2647Ile	ENSP00000356379:p.Leu2647Ile	ENST00000367409:c.7939C>A	No	Yes
1	197070697	SNV	T	C	No	1		Heterozygous	12	24	50	1	8	4	0.333333	39.4167	12	24	9	8	0	0.709419	0.664805	No	1	200	ASPM	protein_coding	ASPM	ENSG00000066279	ASPM	ensembl_havana	protein_coding	ENST00000367409:c.[7684A>G]; ENST00000367408:c.[1816-5403A>G]; ENST00000294732:c.[4066-5403A>G]	ENSP00000356379:p.Ser2562Gly	ENSP00000356379:p.Ser2562Gly	ENST00000367409:c.7684A>G	No	Yes
1	197070901	SNV	A	G	No	1		Homozygous	27	27	100	1	13	14	0.481481	38.5926	27	27	14	14		1	1	No	1	200	ASPM	protein_coding	ASPM	ENSG00000066279	ASPM	ensembl_havana	protein_coding	ENST00000367408:c.[1816-5607T>C]; ENST00000294732:c.[4066-5607T>C]; ENST00000367409:c.[7480T>C]	ENSP00000356379:p.Tyr2494His	ENSP00000356379:p.Tyr2494His	ENST00000367409:c.7480T>C	No	Yes
1	201355522	SNV	T	C	No	1		Homozygous	125	125	100	1	56	69	0.448	37.808	125	125	40	41		1	1	No	1	200	LAD1	protein_coding	LAD1	ENSG00000159166	LAD1	ensembl_havana	protein_coding	ENST00000391967:c.[967A>G]; ENST00000367313:c.[1009A>G]	ENSP00000375829:p.[Lys323Glu]; ENSP00000356282:p.[Lys337Glu]	ENSP00000375829:p.Lys323Glu	ENST00000391967:c.967A>G	No	Yes
1	201355761	SNV	A	G	No	1		Heterozygous	57	134	42.5373	1	22	35	0.385965	38.2281	57	134	25	25	0	0.987531	0.996661	No	1	200	LAD1	protein_coding	LAD1	ENSG00000159166	LAD1	ensembl_havana	protein_coding	ENST00000367313:c.[770T>C]; ENST00000391967:c.[728T>C]	ENSP00000356282:p.[Leu257Pro]; ENSP00000375829:p.[Leu243Pro]	ENSP00000375829:p.Leu243Pro	ENST00000391967:c.728T>C	No	Yes
1	201356001	Deletion	C	-	No	1		Heterozygous	58	150	38.6667	1	46	12	0.206897	37.1034	58	150	22	23	0.52	0.0901557	0.981064	Yes	3	200	LAD1	protein_coding	LAD1	ENSG00000159166	LAD1	ensembl_havana	protein_coding	ENST00000367313:c.[530delG]; ENST00000391967:c.[488delG]	ENSP00000356282:p.[Gly177fs]; ENSP00000375829:p.[Gly163fs]	ENSP00000375829:p.Gly163fs	ENST00000391967:c.488delG	No	Yes
1	201356005..201356006	Deletion	CC	-	No	2		Heterozygous	58	138	42.029	1	46	12	0.206897	39.0172	58	138	22	23	0	0.216944	0.994774	No	1	200	LAD1	protein_coding	LAD1	ENSG00000159166	LAD1	ensembl_havana	protein_coding	ENST00000391967:c.[483_484delGG]; ENST00000367313:c.[525_526delGG]	ENSP00000375829:p.[Leu161fs]; ENSP00000356282:p.[Leu175fs]	ENSP00000375829:p.Leu161fs	ENST00000391967:c.483_484delGG	No	Yes
1	201358304	SNV	C	A	No	1		Homozygous	101	101	100	1	32	69	0.316832	35.0198	101	101	34	35		1	1	No	1	200	LAD1	protein_coding	LAD1	ENSG00000159166	LAD1	ensembl_havana	protein_coding	ENST00000367313:c.[208G>T]; ENST00000391967:c.[166G>T]	ENSP00000356282:p.[Ala70Ser]; ENSP00000375829:p.[Ala56Ser]	ENSP00000375829:p.Ala56Ser	ENST00000391967:c.166G>T	No	Yes
1	201860626	SNV	A	G	No	1		Heterozygous	7	20	35	1	4	3	0.428571	37.4286	7	20	5	5	0.67	0.212185	0.782655	No	1	200	SHISA4	protein_coding	SHISA4	ENSG00000198892	SHISA4	ensembl_havana	protein_coding	ENST00000362011:c.477A>G	ENSP00000355064:p.Ile159Met	ENSP00000355064:p.Ile159Met	ENST00000362011:c.477A>G	No	Yes
1	201952182	SNV	T	G	No	1		Heterozygous	16	32	50	1	13	3	0.1875	37.625	16	32	11	11	0	0.959274	0.962623	No	1	200	RNPEP	protein_coding	RNPEP	ENSG00000176393	RNPEP	ensembl_havana	protein_coding	ENST00000367286:c.[388T>G]; ENST00000295640:c.[388T>G]	ENSP00000356255:p.[Cys130Gly]; ENSP00000295640:p.[Cys130Gly]	ENSP00000295640:p.Cys130Gly	ENST00000295640:c.388T>G	No	Yes
1	201966541	SNV	C	T	No	1		Heterozygous	39	97	40.2062	1	15	24	0.384615	36.6154	39	97	18	16	0	0.796542	1	No	1	200	RNPEP	protein_coding	RNPEP	ENSG00000176393	RNPEP	ensembl_havana	protein_coding	ENST00000447312:c.[556C>T]; ENST00000367286:c.[832C>T]; ENST00000449524:c.[187C>T]; ENST00000295640:c.[949C>T]	ENSP00000389602:p.[Arg186Cys]; ENSP00000356255:p.[Arg278Cys]; ENSP00000407614:p.[Arg63Cys]; ENSP00000295640:p.[Arg317Cys]	ENSP00000295640:p.Arg317Cys	ENST00000295640:c.949C>T	No	Yes
1	201973565	SNV	G	A	No	1		Heterozygous	66	155	42.5806	1	31	35	0.469697	37.6364	66	155	27	27	0	0.895846	0.768126	No	1	200	RNPEP, RP11-465N4.4	protein_coding, antisense	RNPEP, RP11-465N4.4	ENSG00000176393, ENSG00000234678	RNPEP, RP11-465N4.4	ensembl_havana, havana	protein_coding, antisense	ENST00000295640:c.[1735G>A]; ENST00000367286:c.[1618G>A]	ENSP00000295640:p.[Val579Ile]; ENSP00000356255:p.[Val540Ile]	ENSP00000295640:p.Val579Ile	ENST00000295640:c.1735G>A	No	Yes
1	203816536^203816537	Insertion	-	A	No	1		Heterozygous	9	72	12.5	1	5	4	0.444444	38.6667	9	72	5	4	0	0.367322	0.989349	Yes	6	200	ZC3H11A	protein_coding	ZC3H11A	ENSG00000058673	ZC3H11A	ensembl_havana	protein_coding	ENST00000367210:c.[1267_1268insA]; ENST00000367214:c.[1267_1268insA]; ENST00000495527:c.[1267_1268insA]; ENST00000332127:c.[1267_1268insA]; ENST00000367212:c.[1267_1268insA]; ENST00000453771:c.[1267_1268insA]; ENST00000545588:c.[1267_1268insA]	ENSP00000356179:p.[Ser425fs]; ENSP00000356183:p.[Ser425fs]; ENSP00000432602:p.[Ser425fs]; ENSP00000333253:p.[Ser425fs]; ENSP00000356181:p.[Ser425fs]; ENSP00000415072:p.[Ser425fs]; ENSP00000438527:p.[Ser425fs]	ENSP00000432602:p.Ser425fs	ENST00000495527:c.1267_1268insA	No	Yes
1	204230581	SNV	G	A	No	1		Heterozygous	10	13	76.9231	1	6	4	0.4	38.2	10	13	9	9	0.26	0.991796	1	No	1	200	PLEKHA6	protein_coding	PLEKHA6	ENSG00000143850	PLEKHA6	ensembl_havana	protein_coding	ENST00000272203:c.[382-5C>T]; ENST00000414478:c.[437C>T]	ENSP00000402046:p.Pro146Leu		ENST00000272203:c.382-5C>T	No	Yes
1	204237416	SNV	C	T	No	1		Heterozygous	16	25	64	1	11	5	0.3125	37.4375	16	25	14	13	0	0.968822	0.959353	No	1	200	PLEKHA6	protein_coding	PLEKHA6	ENSG00000143850	PLEKHA6	ensembl_havana	protein_coding	ENST00000414478:c.[127G>A]; ENST00000272203:c.[127G>A]	ENSP00000402046:p.[Val43Ile]; ENSP00000272203:p.[Val43Ile]	ENSP00000272203:p.Val43Ile	ENST00000272203:c.127G>A	No	Yes
1	204379617	SNV	T	C	No	1		Homozygous	12	12	100	1	7	5	0.416667	37.25	12	12	9	9		1	1	No	1	200	RP11-739N20.2, PPP1R15B	antisense, protein_coding	RP11-739N20.2, PPP1R15B	ENSG00000226330, ENSG00000158615	RP11-739N20.2, PPP1R15B	havana, ensembl_havana	antisense, protein_coding	ENST00000367188:c.923A>G	ENSP00000356156:p.Asn308Ser	ENSP00000356156:p.Asn308Ser	ENST00000367188:c.923A>G	No	Yes
1	205053219	SNV	C	T	No	1		Homozygous	6	6	100	1	2	4	0.333333	39	6	6	5	5		1	1	No	1	200	TMEM81	protein_coding	TMEM81	ENSG00000174529	TMEM81	ensembl_havana	protein_coding	ENST00000367167:c.230G>A	ENSP00000356135:p.Arg77Gln	ENSP00000356135:p.Arg77Gln	ENST00000367167:c.230G>A	No	Yes
1	205683626^205683627	Insertion	-	A	No	1		Heterozygous	8	153	5.22876	1	4	4	0.5	39	8	153	8	8	0	0.0106339	0.664854	Yes	10	200	NUCKS1, AC119673.1	protein_coding, protein_coding	NUCKS1, AC119673.1	ENSG00000069275, ENSG00000268313	NUCKS1, AC119673.1	ensembl_havana, ensembl	protein_coding, protein_coding	ENST00000367142:c.[*3781_*3782insT]; ENST00000598338:c.[156_157insA]	ENSP00000472790:p.Ser56fs		ENST00000367142:c.*3781_*3782insT	Yes	Yes
1	205688801	Deletion	T	-	No	1		Heterozygous	32	679	4.71281	1	5	27	0.15625	36.4375	32	679	10	10	1.12	4.46123e-10	0.0106247	No	1	200	NUCKS1	protein_coding	NUCKS1	ENSG00000069275	NUCKS1	ensembl_havana	protein_coding	ENST00000367142:c.386delA	ENSP00000356110:p.Asp129fs	ENSP00000356110:p.Asp129fs	ENST00000367142:c.386delA	No	Yes
1	206578650	SNV	G	C	No	1		Heterozygous	12	21	57.1429	1	3	9	0.25	38.5	12	21	6	6	0	0.579843	1	No	1	200	SRGAP2	protein_coding	SRGAP2	ENSG00000163486	SRGAP2	ensembl_havana	protein_coding	ENST00000414007:c.[679G>C]; ENST00000419187:c.[-987G>C]; ENST00000295713:c.[838G>C]	ENSP00000390898:p.[Val227Leu]; ENSP00000295713:p.[Val280Leu]	ENSP00000295713:p.Val280Leu	ENST00000295713:c.838G>C	No	Yes
1	206665052	SNV	C	T	No	1		Heterozygous	7	13	53.8462	1	2	5	0.285714	37.8571	7	13	5	5	0	0.117221	0.967718	No	1	200	IKBKE, C1orf147	protein_coding, protein_coding	IKBKE, C1orf147	ENSG00000143466, ENSG00000162888	IKBKE, C1orf147	ensembl_havana, ensembl_havana	protein_coding, protein_coding	ENST00000537984:c.[1550C>T]; ENST00000367119:c.[*669G>A]; ENST00000367120:c.[1805C>T]	ENSP00000444529:p.[Ala517Val]; ENSP00000356087:p.[Ala602Val]	ENSP00000356087:p.Ala602Val	ENST00000367120:c.1805C>T	No	Yes
1	206776460	SNV	G	A	No	1		Heterozygous	18	29	62.069	1	7	11	0.388889	34.1667	18	29	14	14	2.24	0.943676	0.868418	No	1	200	EIF2D	protein_coding	EIF2D	ENSG00000143486	EIF2D	ensembl_havana	protein_coding	ENST00000367114:c.[530+2293C>T]; ENST00000271764:c.[629C>T]; ENST00000437518:c.[545C>T]	ENSP00000271764:p.[Thr210Ile]; ENSP00000394685:p.[Thr182Ile]	ENSP00000271764:p.Thr210Ile	ENST00000271764:c.629C>T	No	Yes
1	207195352	SNV	T	C	No	1		Heterozygous	10	17	58.8235	1	9	1	0.1	38.9	10	17	7	7	0	0.783637	0.621481	No	1	200	C1orf116	protein_coding	C1orf116	ENSG00000182795	C1orf116	ensembl_havana	protein_coding	ENST00000461135:c.[1019A>G]; ENST00000359470:c.[1757A>G]	ENSP00000436862:p.[Asn340Ser]; ENSP00000352447:p.[Asn586Ser]	ENSP00000352447:p.Asn586Ser	ENST00000359470:c.1757A>G	No	Yes
1	207195652	SNV	C	T	No	1		Heterozygous	14	25	56	1	11	3	0.214286	35.7143	14	25	7	7	0.18	0.244277	0.790987	No	1	200	C1orf116	protein_coding	C1orf116	ENSG00000182795	C1orf116	ensembl_havana	protein_coding	ENST00000461135:c.[719G>A]; ENST00000359470:c.[1457G>A]	ENSP00000436862:p.[Arg240His]; ENSP00000352447:p.[Arg486His]	ENSP00000352447:p.Arg486His	ENST00000359470:c.1457G>A	No	Yes
1	207195779	SNV	A	G	No	1		Homozygous	18	18	100	1	4	14	0.222222	38.8889	18	18	11	11		1	1	No	1	200	C1orf116	protein_coding	C1orf116	ENSG00000182795	C1orf116	ensembl_havana	protein_coding	ENST00000461135:c.[592T>C]; ENST00000359470:c.[1330T>C]	ENSP00000436862:p.[Ser198Pro]; ENSP00000352447:p.[Ser444Pro]	ENSP00000352447:p.Ser444Pro	ENST00000359470:c.1330T>C	No	Yes
1	207196639	SNV	T	G	No	1		Heterozygous	9	17	52.9412	1	3	6	0.333333	36.2222	9	17	6	6	0	0.976958	0.998463	No	1	200	C1orf116	protein_coding	C1orf116	ENSG00000182795	C1orf116	ensembl_havana	protein_coding	ENST00000461135:c.[-269A>C]; ENST00000359470:c.[470A>C]	ENSP00000352447:p.Asn157Thr	ENSP00000352447:p.Asn157Thr	ENST00000359470:c.470A>C	No	Yes
1	207196790	SNV	T	C	No	1		Heterozygous	6	20	30	1	4	2	0.333333	39	6	20	5	5	0	0.684168	0.639759	No	1	200	C1orf116	protein_coding	C1orf116	ENSG00000182795	C1orf116	ensembl_havana	protein_coding	ENST00000359470:c.[319A>G]; ENST00000461135:c.[-420A>G]	ENSP00000352447:p.Thr107Ala	ENSP00000352447:p.Thr107Ala	ENST00000359470:c.319A>G	No	Yes
1	210004199	SNV	C	G	No	1		Homozygous	13	13	100	1	5	8	0.384615	39.3846	13	13	8	8		1	1	No	1	200	DIEXF	protein_coding	DIEXF	ENSG00000117597	DIEXF	ensembl_havana	protein_coding	ENST00000491415:c.199C>G	ENSP00000419005:p.Gln67Glu	ENSP00000419005:p.Gln67Glu	ENST00000491415:c.199C>G	No	Yes
1	212273639	SNV	C	T	No	1		Homozygous	24	25	96	1	15	9	0.375	30.875	24	25	17	17		0.999977	1	No	1	200	DTL	protein_coding	DTL	ENSG00000143476	DTL	ensembl_havana	protein_coding	ENST00000366991:c.[1307C>T]; ENST00000542077:c.[1181C>T]	ENSP00000355958:p.[Ala436Val]; ENSP00000443870:p.[Ala394Val]	ENSP00000355958:p.Ala436Val	ENST00000366991:c.1307C>T	No	Yes
1	212274413	SNV	A	C	No	1		Homozygous	26	26	100	1	21	5	0.192308	36.2308	26	26	14	14		1	1	No	1	200	DTL	protein_coding	DTL	ENSG00000143476	DTL	ensembl_havana	protein_coding	ENST00000366991:c.[2081A>C]; ENST00000542077:c.[1955A>C]	ENSP00000355958:p.[Lys694Thr]; ENSP00000443870:p.[Lys652Thr]	ENSP00000355958:p.Lys694Thr	ENST00000366991:c.2081A>C	No	Yes
1	212911836	SNV	T	C	No	1		Homozygous	51	51	100	1	18	33	0.352941	38.8039	51	51	21	22		1	1	No	1	200	NSL1	protein_coding	NSL1	ENSG00000117697	NSL1	ensembl_havana	protein_coding	ENST00000422588:c.[*203A>G]; ENST00000366977:c.[760A>G]; ENST00000366976:c.[*173A>G]; ENST00000366978:c.[191-11315A>G]; ENST00000366975:c.[637A>G]	ENSP00000355944:p.[Met254Val]; ENSP00000355942:p.[Met213Val]	ENSP00000355944:p.Met254Val	ENST00000366977:c.760A>G	No	Yes
1	212957713	SNV	C	T	No	1		Heterozygous	7	53	13.2075	1	3	4	0.428571	39.7143	7	53	4	4	0	0.183376	0.952442	No	1	200	NSL1	protein_coding	NSL1	ENSG00000117697	NSL1	ensembl_havana	protein_coding	ENST00000422588:c.[436G>A]; ENST00000366978:c.[127G>A]; ENST00000366977:c.[436G>A]; ENST00000366976:c.[436G>A]; ENST00000366975:c.[436G>A]	ENSP00000388406:p.[Glu146Lys]; ENSP00000355945:p.[Glu43Lys]; ENSP00000355944:p.[Glu146Lys]; ENSP00000355943:p.[Glu146Lys]; ENSP00000355942:p.[Glu146Lys]	ENSP00000355944:p.Glu146Lys	ENST00000366977:c.436G>A	No	Yes
1	213186531	SNV	G	A	No	1		Heterozygous	9	17	52.9412	1	3	6	0.333333	38.4444	9	17	6	6	0	0.489777	0.608228	No	1	200	ANGEL2	protein_coding	ANGEL2	ENSG00000174606	ANGEL2	ensembl_havana	protein_coding	ENST00000535388:c.[-123+2424C>T]; ENST00000360506:c.[-123+2424C>T]; ENST00000540642:c.[-244-1731C>T]; ENST00000544555:c.[-373-1731C>T]; ENST00000366962:c.[289C>T]	ENSP00000355929:p.Pro97Ser	ENSP00000355929:p.Pro97Ser	ENST00000366962:c.289C>T	No	Yes
1	214492286	SNV	G	A	No	1		Homozygous	103	104	99.0385	1	71	32	0.31068	37.6408	103	104	29	27		1	1	No	1	200	SMYD2	protein_coding	SMYD2	ENSG00000143499	SMYD2	ensembl_havana	protein_coding	ENST00000366957:c.[494G>A]; ENST00000415093:c.[494G>A]	ENSP00000355924:p.[Gly165Glu]; ENSP00000388682:p.[Gly165Glu]	ENSP00000355924:p.Gly165Glu	ENST00000366957:c.494G>A	No	Yes
1	214817976	SNV	A	G	No	1		Heterozygous	8	27	29.6296	1	3	5	0.375	38.375	8	27	7	7	0	0.766828	0.694964	No	1	200	CENPF	protein_coding	CENPF	ENSG00000117724	CENPF	ensembl_havana	protein_coding	ENST00000366955:c.5063A>G	ENSP00000355922:p.His1688Arg	ENSP00000355922:p.His1688Arg	ENST00000366955:c.5063A>G	No	Yes
1	214818223	SNV	T	A	No	1		Heterozygous	10	25	40	1	6	4	0.4	39.1	10	25	7	7	0	0.354332	0.924776	No	1	200	CENPF	protein_coding	CENPF	ENSG00000117724	CENPF	ensembl_havana	protein_coding	ENST00000366955:c.5310T>A	ENSP00000355922:p.His1770Gln	ENSP00000355922:p.His1770Gln	ENST00000366955:c.5310T>A	No	Yes
1	214830617	SNV	A	G	No	1		Heterozygous	77	155	49.6774	1	51	26	0.337662	36.5455	77	155	28	28	0	0.829128	1	No	1	200	CENPF	protein_coding	CENPF	ENSG00000117724	CENPF	ensembl_havana	protein_coding	ENST00000366955:c.8827A>G	ENSP00000355922:p.Arg2943Gly	ENSP00000355922:p.Arg2943Gly	ENST00000366955:c.8827A>G	No	Yes
1	214837110	SNV	C	G	No	1		Heterozygous	92	194	47.4227	1	29	63	0.315217	37.9891	92	194	32	30	0	0.545079	1	No	1	200	CENPF	protein_coding	CENPF	ENSG00000117724	CENPF	ensembl_havana	protein_coding	ENST00000366955:c.9318C>G	ENSP00000355922:p.Asn3106Lys	ENSP00000355922:p.Asn3106Lys	ENST00000366955:c.9318C>G	No	Yes
1	218458753	SNV	C	T	No	1		Heterozygous	22	40	55	1	18	4	0.181818	34.8182	22	40	11	11	0.2	0.992544	0.999761	No	1	200	RRP15	protein_coding	RRP15	ENSG00000067533	RRP15	ensembl_havana	protein_coding	ENST00000366932:c.95C>T	ENSP00000355899:p.Ala32Val	ENSP00000355899:p.Ala32Val	ENST00000366932:c.95C>T	No	Yes
1	219383905	SNV	A	G	No	1		Homozygous	34	34	100	1	21	13	0.382353	39.1765	34	34	22	20		1	1	No	1	200	LYPLAL1	protein_coding	LYPLAL1	ENSG00000143353	LYPLAL1	ensembl_havana	protein_coding	ENST00000366927:c.[345A>G]; ENST00000366928:c.[393A>G]	ENSP00000355894:p.[Ile115Met]; ENSP00000355895:p.[Ile131Met]	ENSP00000355895:p.Ile131Met	ENST00000366928:c.393A>G	No	Yes
1	220157577^220157578	Insertion	-	T	No	1		Heterozygous	7	116	6.03448	1	5	2	0.285714	39.2857	7	116	6	7	0	0.649175	0.461089	Yes	7	200	EPRS	protein_coding	EPRS	ENSG00000136628	EPRS	ensembl_havana	protein_coding	ENST00000366923:c.3060_3061insA	ENSP00000355890:p.Glu1021fs	ENSP00000355890:p.Glu1021fs	ENST00000366923:c.3060_3061insA	No	Yes
1	220197625	SNV	G	T	No	1		Homozygous	46	46	100	1	21	25	0.456522	36.5	46	46	28	29		1	1	No	1	200	EPRS	protein_coding	EPRS	ENSG00000136628	EPRS	ensembl_havana	protein_coding	ENST00000609181:c.[924C>A]; ENST00000477030:c.[*244C>A]; ENST00000366923:c.[924C>A]	ENSP00000477245:p.[Asp308Glu]; ENSP00000355890:p.[Asp308Glu]	ENSP00000355890:p.Asp308Glu	ENST00000366923:c.924C>A	No	Yes
1	220970028	SNV	A	G	No	1		Homozygous	13	13	100	1	7	6	0.461538	35.6154	13	13	12	12		1	1	No	1	200	MARC1	protein_coding	MARC1	ENSG00000186205	MARC1	ensembl_havana	protein_coding	ENST00000407981:c.[217A>G]; ENST00000366910:c.[493A>G]	ENSP00000385327:p.[Thr73Ala]; ENSP00000355877:p.[Thr165Ala]	ENSP00000355877:p.Thr165Ala	ENST00000366910:c.493A>G	No	Yes
1	222802006	SNV	A	G	No	1		Homozygous	7	7	100	1	7	0	0	38.4286	7	7	2	2		1	1	No	1	200	MIA3	protein_coding	MIA3	ENSG00000154305	MIA3	ensembl_havana	protein_coding	ENST00000344922:c.[1444A>G]; ENST00000344441:c.[1444A>G]; ENST00000344507:c.[1444A>G]; ENST00000354906:c.[190A>G]	ENSP00000340900:p.[Lys482Glu]; ENSP00000340587:p.[Lys482Glu]; ENSP00000341348:p.[Lys482Glu]; ENSP00000355062:p.[Lys64Glu]	ENSP00000340900:p.Lys482Glu	ENST00000344922:c.1444A>G	No	Yes
1	222886119	SNV	A	G	No	1		Homozygous	6	6	100	1	3	3	0.5	37.6667	6	6	4	4		1	1	No	1	200	AIDA, BROX	protein_coding, protein_coding	AIDA, BROX	ENSG00000186063, ENSG00000162819	AIDA, BROX	ensembl_havana, ensembl_havana	protein_coding, protein_coding	ENST00000340934:c.[-182A>G]; ENST00000541237:c.[5T>C]	ENSP00000442882:p.Ile2Thr		ENST00000340934:c.-182A>G	No	Yes
1	223283910	SNV	A	G	No	1		Homozygous	9	9	100	1	5	4	0.444444	37.4444	9	9	9	9		1	1	No	1	200	TLR5	protein_coding	TLR5	ENSG00000187554	TLR5	ensembl_havana	protein_coding	ENST00000366881:c.[2464T>C]; ENST00000540964:c.[2464T>C]; ENST00000342210:c.[2464T>C]	ENSP00000355846:p.[Phe822Leu]; ENSP00000440643:p.[Phe822Leu]; ENSP00000340089:p.[Phe822Leu]	ENSP00000440643:p.Phe822Leu	ENST00000540964:c.2464T>C	No	Yes
1	223900408	SNV	C	G	No	1		Homozygous	78	78	100	1	68	10	0.128205	36.4744	78	78	33	33		1	1	No	1	200	CAPN2	protein_coding	CAPN2	ENSG00000162909	CAPN2	ensembl_havana	protein_coding	ENST00000295006:c.[66C>G]; ENST00000433674:c.[4-5056C>G]; ENST00000434648:c.[4-5056C>G]	ENSP00000295006:p.Asp22Glu	ENSP00000295006:p.Asp22Glu	ENST00000295006:c.66C>G	No	Yes
1	223933079	Deletion	C	-	No	1		Heterozygous	12	215	5.5814	1	10	2	0.166667	35.5833	12	215	2	2		0.0069721	0.746831	Yes	3	200	CAPN2	protein_coding	CAPN2	ENSG00000162909	CAPN2	ensembl_havana	protein_coding	ENST00000295006:c.[498delC]; ENST00000433674:c.[264delC]; ENST00000434648:c.[264delC]	ENSP00000295006:p.[Phe167fs]; ENSP00000413158:p.[Phe89fs]; ENSP00000399949:p.[Phe89fs]	ENSP00000295006:p.Phe167fs	ENST00000295006:c.498delC	No	Yes
1	224424239	SNV	T	C	No	1		Heterozygous	20	41	48.7805	1	11	9	0.45	37.95	20	41	16	16	0.37	0.78297	0.999858	No	1	200	NVL	protein_coding	NVL	ENSG00000143748	NVL	ensembl_havana	protein_coding	ENST00000482491:c.[1507A>G]; ENST00000361463:c.[*147A>G]; ENST00000281701:c.[2335A>G]; ENST00000340871:c.[1768A>G]; ENST00000391875:c.[2017A>G]; ENST00000469075:c.[2062A>G]; ENST00000469968:c.[1981A>G]	ENSP00000417213:p.[Ile503Val]; ENSP00000281701:p.[Ile779Val]; ENSP00000341362:p.[Ile590Val]; ENSP00000375747:p.[Ile673Val]; ENSP00000417826:p.[Ile688Val]; ENSP00000419420:p.[Ile661Val]	ENSP00000281701:p.Ile779Val	ENST00000281701:c.2335A>G	No	Yes
1	224475510	SNV	T	G	No	1		Heterozygous	8	48	16.6667	1	6	2	0.25	39.125	8	48	7	7	0	0.956589	0.978787	No	1	200	NVL	protein_coding	NVL	ENSG00000143748	NVL	ensembl_havana	protein_coding	ENST00000361463:c.[1443A>C]; ENST00000469968:c.[1407A>C]; ENST00000469075:c.[1488A>C]; ENST00000391875:c.[1443A>C]; ENST00000482491:c.[933A>C]; ENST00000340871:c.[1194A>C]; ENST00000281701:c.[1761A>C]	ENSP00000354779:p.[Glu481Asp]; ENSP00000419420:p.[Glu469Asp]; ENSP00000417826:p.[Glu496Asp]; ENSP00000375747:p.[Glu481Asp]; ENSP00000417213:p.[Glu311Asp]; ENSP00000341362:p.[Glu398Asp]; ENSP00000281701:p.[Glu587Asp]	ENSP00000281701:p.Glu587Asp	ENST00000281701:c.1761A>C	No	Yes
1	225607144	SNV	C	T	No	1		Heterozygous	15	29	51.7241	1	4	11	0.266667	37.6	15	29	9	8	0.85	0.93833	0.871565	No	1	200	LBR	protein_coding	LBR	ENSG00000143815	LBR	ensembl_havana	protein_coding	ENST00000272163:c.[461G>A]; ENST00000425080:c.[461G>A]; ENST00000338179:c.[461G>A]	ENSP00000272163:p.[Ser154Asn]; ENSP00000388059:p.[Ser154Asn]; ENSP00000339883:p.[Ser154Asn]	ENSP00000339883:p.Ser154Asn	ENST00000338179:c.461G>A	No	Yes
1	225974645	SNV	A	G	No	1		Heterozygous	12	182	6.59341	1	5	7	0.416667	39.3333	12	182	9	9	0	0.136222	0.66081	No	1	200	SRP9	protein_coding	SRP9	ENSG00000143742	SRP9	ensembl_havana	protein_coding	ENST00000366839:c.[223A>G]; ENST00000366838:c.[142-2091A>G]; ENST00000304786:c.[142-2297A>G]	ENSP00000355804:p.Ser75Gly	ENSP00000355804:p.Ser75Gly	ENST00000366839:c.223A>G	Yes	Yes
1	226026406	SNV	A	G	No	1		Heterozygous	74	173	42.7746	1	45	29	0.391892	36.8378	74	173	31	32	0	0.662139	0.994237	No	1	200	EPHX1	protein_coding	EPHX1	ENSG00000143819	EPHX1	ensembl_havana	protein_coding	ENST00000445856:c.[416A>G]; ENST00000366837:c.[416A>G]; ENST00000272167:c.[416A>G]	ENSP00000398491:p.[His139Arg]; ENSP00000355802:p.[His139Arg]; ENSP00000272167:p.[His139Arg]	ENSP00000355802:p.His139Arg	ENST00000366837:c.416A>G	No	Yes
1	226352498	SNV	T	G	No	1		Homozygous	23	23	100	1	14	9	0.391304	38.087	23	23	17	18		1	1	No	1	200	ACBD3	protein_coding	ACBD3	ENSG00000182827	ACBD3	ensembl_havana	protein_coding	ENST00000366812:c.561A>C	ENSP00000355777:p.Glu187Asp	ENSP00000355777:p.Glu187Asp	ENST00000366812:c.561A>C	No	Yes
1	227182033	SNV	G	A	No	1		Homozygous	12	12	100	1	0	12	0	36.5833	12	12	8	8		1	1	No	1	200	CDC42BPA	protein_coding	CDC42BPA	ENSG00000143776	CDC42BPA	ensembl_havana	protein_coding	ENST00000366766:c.[5201C>T]; ENST00000366765:c.[5135C>T]; ENST00000334218:c.[5282C>T]; ENST00000448940:c.[2888C>T]; ENST00000366769:c.[5096C>T]; ENST00000366764:c.[5012C>T]; ENST00000366767:c.[4853C>T]; ENST00000535525:c.[5036C>T]; ENST00000442054:c.[3080C>T]	ENSP00000355728:p.[Ala1734Val]; ENSP00000355727:p.[Ala1712Val]; ENSP00000335341:p.[Ala1761Val]; ENSP00000415388:p.[Ala963Val]; ENSP00000355731:p.[Ala1699Val]; ENSP00000355726:p.[Ala1671Val]; ENSP00000355729:p.[Ala1618Val]; ENSP00000443275:p.[Ala1679Val]; ENSP00000401051:p.[Ala1027Val]	ENSP00000355731:p.Ala1699Val	ENST00000366769:c.5096C>T	No	Yes
1	227922918	SNV	A	C	No	1		Homozygous	17	17	100	1	4	13	0.235294	37.2941	17	17	13	14		1	1	No	1	200	SNAP47, JMJD4	protein_coding, protein_coding	SNAP47, JMJD4	ENSG00000143740, ENSG00000081692	SNAP47, JMJD4	ensembl_havana, ensembl_havana	protein_coding, protein_coding	ENST00000315781:c.[-193A>C]; ENST00000366759:c.[-193A>C]; ENST00000366758:c.[195T>G]; ENST00000438896:c.[195T>G]; ENST00000366760:c.[-95+6431A>C]	ENSP00000355720:p.[Asp65Glu]; ENSP00000387830:p.[Asp65Glu]	ENSP00000355720:p.Asp65Glu	ENST00000366758:c.195T>G	No	Yes
1	227935444	SNV	A	G	No	1		Homozygous	16	16	100	1	13	3	0.1875	38.75	16	16	10	10		1	1	No	1	200	SNAP47	protein_coding	SNAP47	ENSG00000143740	SNAP47	ensembl_havana	protein_coding	ENST00000418653:c.[69-11252A>G]; ENST00000366760:c.[-94-11252A>G]; ENST00000366759:c.[142A>G]; ENST00000426344:c.[115A>G]; ENST00000315781:c.[142A>G]	ENSP00000355721:p.[Arg48Gly]; ENSP00000411128:p.[Arg39Gly]; ENSP00000314157:p.[Arg48Gly]	ENSP00000411128:p.Arg39Gly	ENST00000426344:c.115A>G	No	Yes
1	228284857^228284858	Insertion	-	A	No	1		Heterozygous	23	528	4.35606	1	10	13	0.434783	38.4348	23	528	16	16	0	0.275068	0.943107	Yes	6	200	ARF1	protein_coding	ARF1	ENSG00000143761	ARF1	ensembl_havana	protein_coding	ENST00000272102:c.[42_43insA]; ENST00000541182:c.[42_43insA]; ENST00000540651:c.[42_43insA]	ENSP00000272102:p.[Glu17fs]; ENSP00000440005:p.[Glu17fs]; ENSP00000442980:p.[Glu17fs]	ENSP00000440005:p.Glu17fs	ENST00000541182:c.42_43insA	No	Yes
1	229623338	SNV	T	C	No	1		Heterozygous	6	18	33.3333	1	4	2	0.333333	36.8333	6	18	5	5	0.26	0.920058	0.99232	No	1	200	NUP133	protein_coding	NUP133	ENSG00000069248	NUP133	ensembl_havana	protein_coding	ENST00000261396:c.[1217A>G]; ENST00000537506:c.[1169A>G]	ENSP00000261396:p.[Gln406Arg]; ENSP00000443496:p.[Gln390Arg]	ENSP00000261396:p.Gln406Arg	ENST00000261396:c.1217A>G	No	Yes
1	230810756	SNV	T	A	No	1		Heterozygous	9	15	60	1	5	4	0.444444	36.8889	9	15	8	8	0	0.721144	0.981288	No	1	200	COG2	protein_coding	COG2	ENSG00000135775	COG2	ensembl_havana	protein_coding	ENST00000534989:c.[735T>A]; ENST00000468893:c.[*770T>A]; ENST00000366669:c.[912T>A]; ENST00000535166:c.[564T>A]; ENST00000366668:c.[912T>A]	ENSP00000440349:p.[Asn245Lys]; ENSP00000355629:p.[Asn304Lys]; ENSP00000445724:p.[Asn188Lys]; ENSP00000355628:p.[Asn304Lys]	ENSP00000440349:p.Asn245Lys	ENST00000534989:c.735T>A	No	Yes
1	231131566^231131567	Insertion	-	A	No	1		Heterozygous	6	45	13.3333	1	0	6	0	39	6	45	4	4	0	0.0353945	0.331388	Yes	9	200	ARV1	protein_coding	ARV1	ENSG00000173409	ARV1	ensembl_havana	protein_coding	ENST00000480519:c.[437_438insA]; ENST00000459891:c.[59_60insA]; ENST00000366658:c.[389_390insA]; ENST00000435927:c.[566_567insA]; ENST00000450711:c.[497_498insA]; ENST00000310256:c.[509_510insA]	ENSP00000436763:p.[Pro150fs]; ENSP00000435420:p.[Pro24fs]; ENSP00000355618:p.[Pro134fs]; ENSP00000394547:p.[Pro193fs]; ENSP00000416039:p.[Pro170fs]; ENSP00000312458:p.[Pro174fs]	ENSP00000312458:p.Pro174fs	ENST00000310256:c.509_510insA	Yes	Yes
1	231488524	SNV	C	T	No	1		Heterozygous	6	13	46.1538	1	4	2	0.333333	38.1667	6	13	6	6	0	0.72872	0.817285	No	1	200	SPRTN	protein_coding	SPRTN	ENSG00000010072	SPRTN	ensembl_havana	protein_coding	ENST00000391858:c.[*1172C>T]; ENST00000295050:c.[887C>T]	ENSP00000295050:p.Pro296Leu		ENST00000391858:c.*1172C>T	No	Yes
1	232574921	SNV	T	C	No	1		Homozygous	9	9	100	1	3	6	0.333333	37.5556	9	9	7	7		1	1	No	1	200	SIPA1L2	protein_coding	SIPA1L2	ENSG00000116991	SIPA1L2	ensembl_havana	protein_coding	ENST00000366630:c.[3964A>G]; ENST00000262861:c.[3964A>G]; ENST00000308942:c.[1186A>G]	ENSP00000355589:p.[Thr1322Ala]; ENSP00000262861:p.[Thr1322Ala]; ENSP00000309102:p.[Thr396Ala]	ENSP00000355589:p.Thr1322Ala	ENST00000366630:c.3964A>G	No	Yes
1	233134086	SNV	C	T	No	1		Heterozygous	8	14	57.1429	1	4	4	0.5	37.625	8	14	6	6	0.25	0.888166	0.907609	No	1	200	PCNXL2	protein_coding	PCNXL2	ENSG00000135749	PCNXL2	ensembl_havana	protein_coding	ENST00000258229:c.[5702G>A]; ENST00000344698:c.[1658G>A]; ENST00000462233:c.[*1041G>A]	ENSP00000258229:p.[Ser1901Asn]; ENSP00000340759:p.[Ser553Asn]	ENSP00000258229:p.Ser1901Asn	ENST00000258229:c.5702G>A	No	Yes
1	234509259	SNV	G	C	No	1		Homozygous	63	63	100	1	62	1	0.015873	36.6825	63	63	17	15		1	1	No	1	200	RP5-827C21.4, COA6	antisense, protein_coding	RP5-827C21.4, COA6	ENSG00000231663, ENSG00000168275	RP5-827C21.4, COA6	havana, ensembl_havana	antisense, protein_coding	ENST00000366615:c.47G>C	ENSP00000355574:p.Ser16Thr	ENSP00000355574:p.Ser16Thr	ENST00000366615:c.47G>C	No	Yes
1	234582651	SNV	T	C	No	1		Homozygous	13	13	100	1	4	9	0.307692	38.1538	13	13	7	7		1	1	No	1	200	TARBP1	protein_coding	TARBP1	ENSG00000059588	TARBP1	ensembl_havana	protein_coding	ENST00000040877:c.2032A>G	ENSP00000040877:p.Ser678Gly	ENSP00000040877:p.Ser678Gly	ENST00000040877:c.2032A>G	No	Yes
1	235505912^235505913	Insertion	-	A	No	1		Heterozygous	6	248	2.41935	1	4	2	0.333333	37.8333	6	248	5	5	0	0.635065	0.719796	Yes	7	200	GGPS1	protein_coding	GGPS1	ENSG00000152904	GGPS1	ensembl_havana	protein_coding	ENST00000282841:c.[728_729insA]; ENST00000358966:c.[728_729insA]; ENST00000476121:c.[728_729insA]; ENST00000488594:c.[728_729insA]; ENST00000391855:c.[566_567insA]	ENSP00000282841:p.[Tyr246fs]; ENSP00000351852:p.[Tyr246fs]; ENSP00000420183:p.[Tyr246fs]; ENSP00000418690:p.[Tyr246fs]; ENSP00000375728:p.[Tyr192fs]	ENSP00000282841:p.Tyr246fs	ENST00000282841:c.728_729insA	No	Yes
1	235594073	SNV	T	C	No	1		Heterozygous	7	18	38.8889	1	1	6	0.142857	33.8571	7	18	6	6	0.47	0.960175	0.863513	No	1	200	TBCE	protein_coding	TBCE	ENSG00000116957	TBCE	ensembl_havana	protein_coding	ENST00000406207:c.[614T>C]; ENST00000366601:c.[614T>C]; ENST00000543662:c.[614T>C]	ENSP00000384571:p.[Val205Ala]; ENSP00000355560:p.[Val205Ala]; ENSP00000439170:p.[Val205Ala]	ENSP00000439170:p.Val205Ala	ENST00000543662:c.614T>C	No	Yes
1	235602193	SNV	A	G	No	1		Heterozygous	30	60	50	1	19	11	0.366667	38.1667	30	60	17	18	0	0.961469	1	No	1	200	TBCE	protein_coding	TBCE	ENSG00000116957	TBCE	ensembl_havana	protein_coding	ENST00000543662:c.[1379A>G]; ENST00000366601:c.[1226A>G]; ENST00000406207:c.[1226A>G]	ENSP00000439170:p.[Glu460Gly]; ENSP00000355560:p.[Glu409Gly]; ENSP00000384571:p.[Glu409Gly]	ENSP00000439170:p.Glu460Gly	ENST00000543662:c.1379A>G	No	Yes
1	236700807	SNV	T	A	No	1		Homozygous	7	8	87.5	1	2	5	0.285714	36.4286	7	8	7	7		0.957626	0.999405	No	1	200	LGALS8	protein_coding	LGALS8	ENSG00000116977	LGALS8	ensembl_havana	protein_coding	ENST00000434231:c.[46-1372T>A]; ENST00000454943:c.[56T>A]; ENST00000481485:c.[56T>A]; ENST00000430527:c.[56T>A]; ENST00000526634:c.[56T>A]; ENST00000529489:c.[56T>A]; ENST00000525042:c.[56T>A]; ENST00000238181:c.[56T>A]; ENST00000526589:c.[56T>A]; ENST00000527974:c.[56T>A]; ENST00000450372:c.[56T>A]; ENST00000406509:c.[56T>A]; ENST00000442397:c.[56T>A]; ENST00000341872:c.[56T>A]; ENST00000416919:…	ENSP00000405504:p.[Phe19Tyr]; ENSP00000435632:p.[Phe19Tyr]; ENSP00000398630:p.[Phe19Tyr]; ENSP00000437040:p.[Phe19Tyr]; ENSP00000437007:p.[Phe19Tyr]; ENSP00000431884:p.[Phe19Tyr]; ENSP00000238181:p.[Phe19Tyr]; ENSP00000435460:p.[Phe19Tyr]; ENSP00000431398:p.[Phe19Tyr]; ENSP00000408657:p.[Phe19Tyr]; ENSP00000385999:p.[Phe19Tyr]; ENSP00000413278:p.[Phe19Tyr]; ENSP00000342139:p.[Phe19Tyr]; ENSP00000…	ENSP00000435460:p.Phe19Tyr	ENST00000526589:c.56T>A	No	Yes
1	236700857	SNV	C	T	No	1		Homozygous	25	25	100	1	17	8	0.32	37.32	25	25	16	16		1	1	No	1	200	LGALS8	protein_coding	LGALS8	ENSG00000116977	LGALS8	ensembl_havana	protein_coding	ENST00000526634:c.[106C>T]; ENST00000450372:c.[106C>T]; ENST00000454943:c.[106C>T]; ENST00000406509:c.[106C>T]; ENST00000526589:c.[106C>T]; ENST00000341872:c.[106C>T]; ENST00000434231:c.[46-1322C>T]; ENST00000238181:c.[106C>T]; ENST00000430527:c.[106C>T]; ENST00000527974:c.[106C>T]; ENST00000352231:c.[106C>T]; ENST00000323938:c.[106C>T]; ENST00000529489:c.[106C>T]; ENST00000442397:c.[106C>T]; ENS…	ENSP00000437040:p.[Arg36Cys]; ENSP00000408657:p.[Arg36Cys]; ENSP00000405504:p.[Arg36Cys]; ENSP00000385999:p.[Arg36Cys]; ENSP00000435460:p.[Arg36Cys]; ENSP00000342139:p.[Arg36Cys]; ENSP00000238181:p.[Arg36Cys]; ENSP00000398630:p.[Arg36Cys]; ENSP00000431398:p.[Arg36Cys]; ENSP00000309576:p.[Arg36Cys]; ENSP00000434860:p.[Arg36Cys]; ENSP00000437007:p.[Arg36Cys]; ENSP00000413278:p.[Arg36Cys]; ENSP00000…	ENSP00000435460:p.Arg36Cys	ENST00000526589:c.106C>T	No	Yes
1	236702209..236702210	MNV	CA	TG	No	2		Homozygous	6	6	100	1	3	3	0.5	35.1667	6	6	5	5		1	1	No	1	200	LGALS8	protein_coding	LGALS8	ENSG00000116977	LGALS8	ensembl_havana	protein_coding	ENST00000238181:c.[165_166delCAinsTG]; ENST00000366584:c.[165_166delCAinsTG]; ENST00000434231:c.[76_77delCAinsTG]; ENST00000481485:c.[165_166delCAinsTG]; ENST00000450372:c.[165_166delCAinsTG]; ENST00000525042:c.[165_166delCAinsTG]; ENST00000416919:c.[165_166delCAinsTG]; ENST00000352231:c.[165_166delCAinsTG]; ENST00000527974:c.[165_166delCAinsTG]; ENST00000442397:c.[158_159delCAinsTG]; ENST0000043…	ENSP00000238181:p.[Met56Val]; ENSP00000355543:p.[Met56Val]; ENSP00000407428:p.[His26Cys]; ENSP00000435632:p.[Met56Val]; ENSP00000408657:p.[Met56Val]; ENSP00000431884:p.[Met56Val]; ENSP00000410843:p.[Met56Val]; ENSP00000309576:p.[Met56Val]; ENSP00000431398:p.[Met56Val]; ENSP00000413278:p.[Ala53Val]; ENSP00000398630:p.[Met56Val]; ENSP00000435460:p.[Met56Val]; ENSP00000342139:p.[Met56Val]; ENSP00000…	ENSP00000435460:p.Met56Val	ENST00000526589:c.165_166delCAinsTG	No	Yes
1	236706862	SNV	G	C	No	1		Homozygous	17	17	100	1	14	3	0.176471	37.8235	17	17	12	12		1	1	No	1	200	LGALS8, RP11-385F5.4	protein_coding, antisense	LGALS8, RP11-385F5.4	ENSG00000116977, ENSG00000230325	LGALS8, RP11-385F5.4	ensembl_havana, havana	protein_coding, antisense	ENST00000416919:c.[501G>C]; ENST00000527974:c.[678G>C]; ENST00000526634:c.[552G>C]; ENST00000366584:c.[552G>C]; ENST00000450372:c.[678G>C]; ENST00000323938:c.[471G>C]; ENST00000238181:c.[375G>C]; ENST00000526589:c.[678G>C]; ENST00000352231:c.[678G>C]; ENST00000525042:c.[501G>C]; ENST00000341872:c.[552G>C]	ENSP00000410843:p.[Arg167Ser]; ENSP00000431398:p.[Arg226Ser]; ENSP00000437040:p.[Arg184Ser]; ENSP00000355543:p.[Arg184Ser]; ENSP00000408657:p.[Arg226Ser]; ENSP00000434860:p.[Arg157Ser]; ENSP00000238181:p.[Arg125Ser]; ENSP00000435460:p.[Arg226Ser]; ENSP00000309576:p.[Arg226Ser]; ENSP00000431884:p.[Arg167Ser]; ENSP00000342139:p.[Arg184Ser]	ENSP00000435460:p.Arg226Ser	ENST00000526589:c.678G>C	No	Yes
1	236717926	SNV	T	C	No	1		Homozygous	20	20	100	1	16	4	0.2	38.25	20	20	12	12		1	1	No	1	200	HEATR1	protein_coding	HEATR1	ENSG00000119285	HEATR1	ensembl_havana	protein_coding	ENST00000366581:c.[5807A>G]; ENST00000366582:c.[6050A>G]	ENSP00000355540:p.[Glu1936Gly]; ENSP00000355541:p.[Glu2017Gly]	ENSP00000355541:p.Glu2017Gly	ENST00000366582:c.6050A>G	No	Yes
1	236718620	SNV	T	C	No	1		Homozygous	29	29	100	1	11	18	0.37931	38.931	29	29	19	19		1	1	No	1	200	HEATR1	protein_coding	HEATR1	ENSG00000119285	HEATR1	ensembl_havana	protein_coding	ENST00000366581:c.[5656A>G]; ENST00000366582:c.[5899A>G]	ENSP00000355540:p.[Asn1886Asp]; ENSP00000355541:p.[Asn1967Asp]	ENSP00000355541:p.Asn1967Asp	ENST00000366582:c.5899A>G	No	Yes
1	236719193	SNV	A	G	No	1		Homozygous	33	33	100	1	20	13	0.393939	37.8788	33	33	21	21		1	1	No	1	200	HEATR1	protein_coding	HEATR1	ENSG00000119285	HEATR1	ensembl_havana	protein_coding	ENST00000366581:c.[5318T>C]; ENST00000366582:c.[5561T>C]	ENSP00000355540:p.[Val1773Ala]; ENSP00000355541:p.[Val1854Ala]	ENSP00000355541:p.Val1854Ala	ENST00000366582:c.5561T>C	No	Yes
1	236721660	SNV	T	C	No	1		Homozygous	21	21	100	1	13	8	0.380952	37.6667	21	21	15	16		1	1	No	1	200	HEATR1	protein_coding	HEATR1	ENSG00000119285	HEATR1	ensembl_havana	protein_coding	ENST00000366581:c.[4838A>G]; ENST00000366582:c.[5081A>G]	ENSP00000355540:p.[Asn1613Ser]; ENSP00000355541:p.[Asn1694Ser]	ENSP00000355541:p.Asn1694Ser	ENST00000366582:c.5081A>G	No	Yes
1	241661141	SNV	A	G	No	1		Heterozygous	10	214	4.6729	1	10	0	0	31.7	10	214	2	2	3.22	0.0315542	0.223005	No	1	100.321	FH	protein_coding	FH	ENSG00000091483	FH	ensembl_havana	protein_coding	ENST00000366560:c.1520T>C	ENSP00000355518:p.Leu507Pro	ENSP00000355518:p.Leu507Pro	ENST00000366560:c.1520T>C	No	Yes
1	242030151	SNV	A	G	No	1		Heterozygous	15	26	57.6923	1	10	5	0.333333	38.7333	15	26	12	12	0	0.802423	0.762914	No	1	200	EXO1	protein_coding	EXO1	ENSG00000174371	EXO1	ensembl_havana	protein_coding	ENST00000366548:c.[1061A>G]; ENST00000518483:c.[1061A>G]; ENST00000348581:c.[1061A>G]	ENSP00000355506:p.[His354Arg]; ENSP00000430251:p.[His354Arg]; ENSP00000311873:p.[His354Arg]	ENSP00000355506:p.His354Arg	ENST00000366548:c.1061A>G	No	Yes
1	242042301	SNV	G	A	No	1		Heterozygous	14	24	58.3333	1	6	8	0.428571	37.7857	14	24	11	11	0	0.959482	1	No	1	200	EXO1	protein_coding	EXO1	ENSG00000174371	EXO1	ensembl_havana	protein_coding	ENST00000348581:c.[1765G>A]; ENST00000518483:c.[1765G>A]; ENST00000366548:c.[1765G>A]	ENSP00000311873:p.[Glu589Lys]; ENSP00000430251:p.[Glu589Lys]; ENSP00000355506:p.[Glu589Lys]	ENSP00000355506:p.Glu589Lys	ENST00000366548:c.1765G>A	No	Yes
1	242042545	SNV	A	G	No	1		Homozygous	26	26	100	1	9	17	0.346154	38.7692	26	26	15	16		1	1	No	1	200	EXO1	protein_coding	EXO1	ENSG00000174371	EXO1	ensembl_havana	protein_coding	ENST00000518483:c.[2009A>G]; ENST00000521202:c.[203A>G]; ENST00000348581:c.[2009A>G]; ENST00000366548:c.[2009A>G]	ENSP00000430251:p.[Glu670Gly]; ENSP00000428326:p.[Glu68Gly]; ENSP00000311873:p.[Glu670Gly]; ENSP00000355506:p.[Glu670Gly]	ENSP00000355506:p.Glu670Gly	ENST00000366548:c.2009A>G	No	Yes
1	242045275	SNV	C	T	No	1		Homozygous	41	41	100	1	24	17	0.414634	37.6585	41	41	18	18		1	1	No	1	200	EXO1	protein_coding	EXO1	ENSG00000174371	EXO1	ensembl_havana	protein_coding	ENST00000521202:c.[303+2630C>T]; ENST00000518483:c.[2167C>T]; ENST00000366548:c.[2167C>T]; ENST00000348581:c.[2167C>T]	ENSP00000430251:p.[Arg723Cys]; ENSP00000355506:p.[Arg723Cys]; ENSP00000311873:p.[Arg723Cys]	ENSP00000355506:p.Arg723Cys	ENST00000366548:c.2167C>T	No	Yes
1	247162658	SNV	C	T	No	1		Heterozygous	7	15	46.6667	1	0	7	0	38.8571	7	15	6	6	0	0.896572	1	No	1	200	ZNF695, ZNF670	protein_coding, protein_coding	ZNF695, ZNF670	ENSG00000197472, ENSG00000135747	ZNF695, ZNF670	ensembl_havana, ensembl_havana	protein_coding, protein_coding	ENST00000491337:c.[251G>A]; ENST00000339986:c.[251G>A]; ENST00000474541:c.[215G>A]; ENST00000366504:c.[251G>A]; ENST00000479214:c.[215G>A]; ENST00000465049:c.[215G>A]; ENST00000487338:c.[251G>A]	ENSP00000429540:p.[Arg84Lys]; ENSP00000341236:p.[Arg84Lys]; ENSP00000428036:p.[Arg72Lys]; ENSP00000355460:p.[Arg84Lys]; ENSP00000430580:p.[Arg72Lys]; ENSP00000428213:p.[Arg72Lys]; ENSP00000429736:p.[Arg84Lys]	ENSP00000341236:p.Arg84Lys	ENST00000339986:c.251G>A	No	Yes
1	249150116	SNV	G	C	No	1		Heterozygous	13	32	40.625	1	4	9	0.307692	37.6923	13	32	9	9	0	0.98873	0.86869	No	1	200	ZNF692	protein_coding	ZNF692	ENSG00000171163	ZNF692	ensembl_havana	protein_coding	ENST00000412341:c.[*225C>G]; ENST00000366471:c.[554C>G]; ENST00000451251:c.[704C>G]; ENST00000427146:c.[554C>G]; ENST00000496411:c.[*519C>G]; ENST00000476503:c.[26C>G]; ENST00000366469:c.[686C>G]; ENST00000463519:c.[*934C>G]; ENST00000477070:c.[391C>G]; ENST00000306601:c.[689C>G]	ENSP00000355427:p.[Pro185Arg]; ENSP00000391200:p.[Pro235Arg]; ENSP00000390044:p.[Pro185Arg]; ENSP00000431582:p.[Pro9Arg]; ENSP00000355425:p.[Pro229Arg]; ENSP00000436814:p.[Leu131Val]; ENSP00000305483:p.[Pro230Arg]		ENST00000463519:c.*934C>G	No	Yes
1	249151611	SNV	C	T	No	1		Heterozygous	6	10	60	1	3	3	0.5	37.1667	6	10	5	5	0.42	0.868509	1	No	1	156.536	ZNF692	protein_coding	ZNF692	ENSG00000171163	ZNF692	ensembl_havana	protein_coding	ENST00000366469:c.[297G>A]; ENST00000477070:c.[84G>A]; ENST00000483223:c.[*212G>A]; ENST00000533647:c.[*151G>A]; ENST00000306601:c.[297G>A]; ENST00000496411:c.[*212G>A]; ENST00000366471:c.[297G>A]; ENST00000496231:c.[297G>A]; ENST00000412341:c.[236G>A]; ENST00000528141:c.[*262G>A]; ENST00000463519:c.[*542G>A]; ENST00000427146:c.[297G>A]; ENST00000451251:c.[312G>A]	ENSP00000393552:p.[Gly79Asp]		ENST00000463519:c.*542G>A	No	Yes
2	45895	SNV	A	G	No	1		Homozygous	7	7	100	1	7	0	0	39.2857	7	7	4	4		1	1	No	1	200	FAM110C	protein_coding	FAM110C	ENSG00000184731	FAM110C	ensembl_havana	protein_coding	ENST00000327669:c.491T>C	ENSP00000328347:p.Ile164Thr	ENSP00000328347:p.Ile164Thr	ENST00000327669:c.491T>C	No	Yes
2	676177	SNV	C	G	No	1		Heterozygous	21	27	77.7778	1	11	10	0.47619	38.8095	21	27	17	15	0	0.985927	1	No	1	200	TMEM18	protein_coding	TMEM18	ENSG00000151353	TMEM18	ensembl_havana	protein_coding	ENST00000418447:c.[117G>C]; ENST00000281017:c.[58-547G>C]; ENST00000432667:c.[119G>C]; ENST00000405941:c.[66+397G>C]	ENSP00000408658:p.[Gln39His]; ENSP00000390474:p.[Ser40Thr]		ENST00000281017:c.58-547G>C	No	Yes
2	1642700	SNV	G	A	No	1		Heterozygous	9	21	42.8571	1	4	5	0.444444	40	9	21	7	7	0	0.992467	0.991747	No	1	200	PXDN	protein_coding	PXDN	ENSG00000130508	PXDN	ensembl_havana	protein_coding	ENST00000252804:c.[4124C>T]; ENST00000453308:c.[224+374C>T]	ENSP00000252804:p.Thr1375Ile	ENSP00000252804:p.Thr1375Ile	ENST00000252804:c.4124C>T	No	Yes
2	1642736	SNV	C	T	No	1		Heterozygous	11	26	42.3077	1	7	4	0.363636	38.1818	11	26	7	7	0	0.308189	1	No	1	200	PXDN	protein_coding	PXDN	ENSG00000130508	PXDN	ensembl_havana	protein_coding	ENST00000453308:c.[224+338G>A]; ENST00000252804:c.[4088G>A]	ENSP00000252804:p.Gly1363Glu	ENSP00000252804:p.Gly1363Glu	ENST00000252804:c.4088G>A	No	Yes
2	3392295	SNV	A	G	No	1		Heterozygous	14	24	58.3333	1	8	6	0.428571	38.5	14	24	9	9	0	0.983217	1	No	1	200	TRAPPC12	protein_coding	TRAPPC12	ENSG00000171853	TRAPPC12	ensembl_havana	protein_coding	ENST00000382110:c.[901A>G]; ENST00000411973:c.[397A>G]; ENST00000324266:c.[901A>G]	ENSP00000371544:p.[Ser301Gly]; ENSP00000405626:p.[Ser133Gly]; ENSP00000324318:p.[Ser301Gly]	ENSP00000324318:p.Ser301Gly	ENST00000324266:c.901A>G	No	Yes
2	3469463	SNV	G	C	No	1		Heterozygous	33	50	66	1	18	15	0.454545	38.4545	33	50	20	20	0	0.999481	0.999561	No	1	200	TRAPPC12	protein_coding	TRAPPC12	ENSG00000171853	TRAPPC12	ensembl_havana	protein_coding	ENST00000382110:c.[1773G>C]; ENST00000415624:c.[267G>C]; ENST00000437733:c.[*178G>C]; ENST00000416918:c.[19G>C]; ENST00000417243:c.[606G>C]; ENST00000324266:c.[1773G>C]	ENSP00000395420:p.[Ala7Pro]		ENST00000324266:c.1773G>C	No	Yes
2	3625337^3625338	Insertion	-	A	No	1		Heterozygous	42	2965	1.41653	1	22	20	0.47619	39.1667	42	2965	22	22	0	0.0302914	0.999568	Yes	6	200	RPS7	protein_coding	RPS7	ENSG00000171863	RPS7	ensembl_havana	protein_coding	ENST00000407445:c.[329_330insA]; ENST00000406376:c.[329_330insA]; ENST00000304921:c.[329_330insA]; ENST00000403564:c.[329_330insA]	ENSP00000385729:p.[Asn112fs]; ENSP00000385286:p.[Asn112fs]; ENSP00000339095:p.[Asn112fs]; ENSP00000385018:p.[Asn112fs]	ENSP00000385729:p.Asn112fs	ENST00000407445:c.329_330insA	No	Yes
2	9528536	SNV	G	C	No	1		Homozygous	22	22	100	1	11	11	0.5	37.3182	22	22	12	11		1	1	No	1	200	ASAP2	protein_coding	ASAP2	ENSG00000151693	ASAP2	ensembl_havana	protein_coding	ENST00000315273:c.[2244G>C]; ENST00000281419:c.[2244G>C]	ENSP00000316404:p.[Glu748Asp]; ENSP00000281419:p.[Glu748Asp]	ENSP00000281419:p.Glu748Asp	ENST00000281419:c.2244G>C	No	Yes
2	9558805^9558806	Insertion	-	T	No	1		Heterozygous	20	313	6.38978	1	5	15	0.25	36.7	20	313	8	8	0	0.00200813	0.193188	Yes	6	200	ITGB1BP1	protein_coding	ITGB1BP1	ENSG00000119185	ITGB1BP1	ensembl_havana	protein_coding	ENST00000456913:c.[21_22insA]; ENST00000467606:c.[21_22insA]; ENST00000355346:c.[21_22insA]; ENST00000494563:c.[21_22insA]; ENST00000460001:c.[21_22insA]; ENST00000497105:c.[21_22insA]; ENST00000464228:c.[21_22insA]; ENST00000488451:c.[21_22insA]; ENST00000238091:c.[21_22insA]; ENST00000483795:c.[21_22insA]; ENST00000359712:c.[21_22insA]; ENST00000360635:c.[21_22insA]; ENST00000484735:c.[21_22ins…	ENSP00000389704:p.[Arg8fs]; ENSP00000419814:p.[Arg8fs]; ENSP00000347504:p.[Arg8fs]; ENSP00000417940:p.[Arg8fs]; ENSP00000417850:p.[Arg8fs]; ENSP00000418947:p.[Arg8fs]; ENSP00000419452:p.[Arg8fs]; ENSP00000419524:p.[Arg8fs]; ENSP00000238091:p.[Arg8fs]; ENSP00000433814:p.[Arg8fs]; ENSP00000352743:p.[Arg8fs]; ENSP00000353850:p.[Arg8fs]; ENSP00000418526:p.[Arg8fs]; ENSP00000420770:p.[Arg8fs]	ENSP00000353850:p.Arg8fs	ENST00000360635:c.21_22insA	No	Yes
2	9667930	SNV	T	C	No	1		Heterozygous	6	12	50	1	1	5	0.166667	36	6	12	5	4	0	0.409277	0.965376	No	1	200	ADAM17	protein_coding	ADAM17	ENSG00000151694	ADAM17	ensembl_havana	protein_coding	ENST00000310823:c.[604A>G]; ENST00000497134:c.[604A>G]	ENSP00000309968:p.[Arg202Gly]; ENSP00000418728:p.[Arg202Gly]	ENSP00000309968:p.Arg202Gly	ENST00000310823:c.604A>G	No	Yes
2	9983686	SNV	G	T	No	1		Heterozygous	9	13	69.2308	1	6	3	0.333333	28.6667	9	13	7	7	0	0.742341	0.930588	No	1	200	TAF1B	protein_coding	TAF1B	ENSG00000115750	TAF1B	ensembl_havana	protein_coding	ENST00000263663:c.[16G>T]; ENST00000416181:c.[16G>T]; ENST00000396242:c.[-726G>T]; ENST00000434858:c.[16G>T]	ENSP00000263663:p.[Ala6Ser]; ENSP00000402955:p.[Ala6Ser]; ENSP00000414184:p.[Ala6Ser]	ENSP00000263663:p.Ala6Ser	ENST00000263663:c.16G>T	No	Yes
2	10045024	SNV	G	A	No	1		Homozygous	22	22	100	1	13	9	0.409091	37.5455	22	22	14	15		1	1	No	1	200	TAF1B	protein_coding	TAF1B	ENSG00000115750	TAF1B	ensembl_havana	protein_coding	ENST00000396242:c.[79G>A]; ENST00000263663:c.[844G>A]; ENST00000434858:c.[*105G>A]; ENST00000492648:c.[157G>A]	ENSP00000379542:p.[Val27Ile]; ENSP00000263663:p.[Val282Ile]; ENSP00000475608:p.[Val53Ile]	ENSP00000263663:p.Val282Ile	ENST00000263663:c.844G>A	No	Yes
2	10101468	SNV	A	G	No	1		Heterozygous	14	28	50	1	9	5	0.357143	38.2143	14	28	8	7	0	0.908098	1	No	1	200	GRHL1	protein_coding	GRHL1	ENSG00000134317	GRHL1	ensembl_havana	protein_coding	ENST00000472167:c.[572A>G]; ENST00000324907:c.[572A>G]; ENST00000405379:c.[572A>G]; ENST00000324883:c.[82A>G]; ENST00000464418:c.[581A>G]	ENSP00000418275:p.[Asn191Ser]; ENSP00000324693:p.[Asn191Ser]; ENSP00000384209:p.[Asn191Ser]; ENSP00000324494:p.[Ile28Val]; ENSP00000420654:p.[Asn194Ser]	ENSP00000324693:p.Asn191Ser	ENST00000324907:c.572A>G	No	Yes
2	10126330	SNV	G	A	No	1		Heterozygous	12	25	48	1	8	4	0.333333	38.5	12	25	11	10	0	0.721347	0.990742	No	1	200	GRHL1	protein_coding	GRHL1	ENSG00000134317	GRHL1	ensembl_havana	protein_coding	ENST00000324883:c.[622G>A]; ENST00000324907:c.[1189G>A]; ENST00000405379:c.[1189G>A]; ENST00000464418:c.[*431G>A]; ENST00000472167:c.[1189G>A]	ENSP00000324494:p.[Val208Ile]; ENSP00000324693:p.[Val397Ile]; ENSP00000384209:p.[Val397Ile]; ENSP00000418275:p.[Val397Ile]	ENSP00000324693:p.Val397Ile	ENST00000324907:c.1189G>A	No	Yes
2	10262920	SNV	T	G	No	1		Homozygous	293	293	100	1	198	95	0.324232	35.3413	293	293	35	31		1	1	No	1	200	RRM2	protein_coding	RRM2	ENSG00000171848	RRM2	ensembl_havana	protein_coding	ENST00000360566:c.[175T>G]; ENST00000304567:c.[-6T>G]	ENSP00000353770:p.Ser59Ala	ENSP00000353770:p.Ser59Ala	ENST00000360566:c.175T>G	No	Yes
2	10729257	SNV	T	C	No	1		Heterozygous	42	103	40.7767	1	26	16	0.380952	38.4286	42	103	20	20	0	0.668913	0.753924	No	1	200	NOL10	protein_coding	NOL10	ENSG00000115761	NOL10	ensembl_havana	protein_coding	ENST00000381685:c.[1756A>G]; ENST00000345985:c.[1606A>G]; ENST00000538384:c.[1678A>G]; ENST00000542668:c.[1606A>G]	ENSP00000371101:p.[Thr586Ala]; ENSP00000263837:p.[Thr536Ala]; ENSP00000439663:p.[Thr560Ala]; ENSP00000437625:p.[Thr536Ala]	ENSP00000263837:p.Thr536Ala	ENST00000345985:c.1606A>G	No	Yes
2	10930903	SNV	T	C	No	1		Heterozygous	235	524	44.8473	1	121	114	0.485106	37.8468	235	524	51	49	1.73	0.786278	1	No	1	200	PDIA6	protein_coding	PDIA6	ENSG00000143870	PDIA6	ensembl_havana	protein_coding	ENST00000272227:c.[641A>G]; ENST00000404371:c.[797A>G]; ENST00000404824:c.[785A>G]; ENST00000540494:c.[632A>G]; ENST00000381611:c.[656A>G]	ENSP00000272227:p.[Lys214Arg]; ENSP00000385385:p.[Lys266Arg]; ENSP00000384459:p.[Lys262Arg]; ENSP00000438778:p.[Lys211Arg]; ENSP00000371024:p.[Lys219Arg]	ENSP00000385385:p.Lys266Arg	ENST00000404371:c.797A>G	No	Yes
2	12880690	SNV	C	G	No	1		Heterozygous	6	33	18.1818	1	5	1	0.166667	38.8333	6	33	5	5	0	0.356632	0.263478	No	1	200	TRIB2	protein_coding	TRIB2	ENSG00000071575	TRIB2	ensembl_havana	protein_coding	ENST00000381465:c.[394C>G]; ENST00000155926:c.[802C>G]	ENSP00000370874:p.[Arg132Gly]; ENSP00000155926:p.[Arg268Gly]	ENSP00000155926:p.Arg268Gly	ENST00000155926:c.802C>G	No	Yes
2	15737558^15737559	Insertion	-	A	No	1		Heterozygous	11	128	8.59375	1	7	4	0.363636	38.6364	11	128	10	10	0	0.0170985	0.394923	Yes	6	200	DDX1	protein_coding	DDX1	ENSG00000079785	DDX1	ensembl_havana	protein_coding	ENST00000381341:c.[222_223insA]; ENST00000233084:c.[222_223insA]	ENSP00000370745:p.[Gly77fs]; ENSP00000233084:p.[Gly77fs]	ENSP00000370745:p.Gly77fs	ENST00000381341:c.222_223insA	No	Yes
2	17884495	SNV	C	T	No	1		Heterozygous	40	71	56.338	1	5	35	0.125	38.8	40	71	19	17	0	0.991124	0.931971	No	1	200	SMC6	protein_coding	SMC6	ENSG00000163029	SMC6	ensembl_havana	protein_coding	ENST00000446852:c.[2149G>A]; ENST00000381272:c.[2149G>A]; ENST00000351948:c.[2071G>A]; ENST00000402989:c.[2071G>A]; ENST00000448223:c.[2071G>A]	ENSP00000408644:p.[Ala717Thr]; ENSP00000370672:p.[Ala717Thr]; ENSP00000323439:p.[Ala691Thr]; ENSP00000384539:p.[Ala691Thr]; ENSP00000404092:p.[Ala691Thr]	ENSP00000404092:p.Ala691Thr	ENST00000448223:c.2071G>A	No	Yes
2	17962928	SNV	A	G	No	1		Heterozygous	10	19	52.6316	1	5	5	0.5	39.5	10	19	8	9	0	0.922832	1	No	1	200	SMC6, GEN1	protein_coding, protein_coding	SMC6, GEN1	ENSG00000163029, ENSG00000178295	SMC6, GEN1	ensembl_havana, ensembl_havana	protein_coding, protein_coding	ENST00000317402:c.[2449A>G]; ENST00000381254:c.[2449A>G]; ENST00000428868:c.[-6+6154T>C]; ENST00000402989:c.[-6+6154T>C]	ENSP00000318977:p.[Thr817Ala]; ENSP00000370653:p.[Thr817Ala]	ENSP00000370653:p.Thr817Ala	ENST00000381254:c.2449A>G	No	Yes
2	20101467^20101468	Insertion	-	G	No	1		Heterozygous	7	29	24.1379	1	4	3	0.428571	39.7143	7	29	6	6	0	0.528515	0.833509	No	1	200	TTC32	protein_coding	TTC32	ENSG00000183891	TTC32	ensembl_havana	protein_coding	ENST00000333610:c.[148_149insC]; ENST00000402414:c.[148_149insC]	ENSP00000333018:p.[Ser50fs]; ENSP00000385708:p.[Arg50fs]	ENSP00000333018:p.Ser50fs	ENST00000333610:c.148_149insC	No	Yes
2	20101470	SNV	C	G	No	1		Heterozygous	7	31	22.5806	1	4	3	0.428571	39.2857	7	31	6	6	0	0.0639795	0.774155	No	1	200	TTC32	protein_coding	TTC32	ENSG00000183891	TTC32	ensembl_havana	protein_coding	ENST00000402414:c.[146G>C]; ENST00000333610:c.[146G>C]	ENSP00000385708:p.[Gly49Ala]; ENSP00000333018:p.[Gly49Ala]	ENSP00000333018:p.Gly49Ala	ENST00000333610:c.146G>C	No	Yes
2	20403794	SNV	A	T	No	1		Homozygous	176	176	100	1	53	123	0.301136	37.767	176	176	43	44		1	1	No	1	200	SDC1	protein_coding	SDC1	ENSG00000115884	SDC1	ensembl_havana	protein_coding	ENST00000403076:c.[407T>A]; ENST00000381150:c.[407T>A]; ENST00000254351:c.[407T>A]; ENST00000429035:c.[431T>A]	ENSP00000384613:p.[Leu136Gln]; ENSP00000370542:p.[Leu136Gln]; ENSP00000254351:p.[Leu136Gln]; ENSP00000400773:p.[Leu144Gln]	ENSP00000370542:p.Leu136Gln	ENST00000381150:c.407T>A	No	Yes
2	20824498	SNV	C	T	No	1		Homozygous	29	29	100	1	10	19	0.344828	38.6207	29	29	17	17		1	1	No	1	200	HS1BP3	protein_coding	HS1BP3	ENSG00000118960	HS1BP3	ensembl_havana	protein_coding	ENST00000445102:c.[154G>A]; ENST00000446825:c.[*534G>A]; ENST00000304031:c.[778G>A]; ENST00000458740:c.[235G>A]; ENST00000415264:c.[34G>A]	ENSP00000397546:p.[Val52Met]; ENSP00000305193:p.[Val260Met]; ENSP00000392203:p.[Val79Met]; ENSP00000387364:p.[Val12Met]	ENSP00000305193:p.Val260Met	ENST00000304031:c.778G>A	No	Yes
2	20885321	SNV	C	A	No	1		Heterozygous	12	24	50	1	3	9	0.25	35.8333	12	24	11	11	0	0.995795	0.992115	No	1	200	C2orf43	protein_coding	C2orf43	ENSG00000118961	C2orf43	ensembl_havana	protein_coding	ENST00000403006:c.[681G>T]; ENST00000237822:c.[*1342G>T]; ENST00000381090:c.[1071G>T]	ENSP00000384267:p.[Leu227Phe]; ENSP00000370480:p.[Leu357Phe]		ENST00000237822:c.*1342G>T	No	Yes
2	25141538	SNV	A	G	No	1		Homozygous	21	21	100	1	11	10	0.47619	38.3333	21	21	15	14		1	1	No	1	200	ADCY3	protein_coding	ADCY3	ENSG00000138031	ADCY3	ensembl_havana	protein_coding	ENST00000435135:c.[319T>C]; ENST00000260600:c.[319T>C]; ENST00000438445:c.[319T>C]	ENSP00000389799:p.[Ser107Pro]; ENSP00000260600:p.[Ser107Pro]; ENSP00000406153:p.[Ser107Pro]	ENSP00000260600:p.Ser107Pro	ENST00000260600:c.319T>C	No	Yes
2	25965532	SNV	C	G	No	1		Heterozygous	6	8	75	1	2	4	0.333333	39.3333	6	8	6	6	0	0.859392	0.906958	No	1	200	ASXL2	protein_coding	ASXL2	ENSG00000143970	ASXL2	ensembl_havana	protein_coding	ENST00000435504:c.[3674G>C]; ENST00000336112:c.[3590G>C]; ENST00000272341:c.[2123G>C]; ENST00000404843:c.[2123G>C]	ENSP00000391447:p.[Cys1225Ser]; ENSP00000337250:p.[Cys1197Ser]; ENSP00000272341:p.[Cys708Ser]; ENSP00000383920:p.[Cys708Ser]	ENSP00000391447:p.Cys1225Ser	ENST00000435504:c.3674G>C	No	Yes
2	26203678	SNV	T	C	No	1		Homozygous	12	12	100	1	4	8	0.333333	37.0833	12	12	8	7		1	1	No	1	200	KIF3C	protein_coding	KIF3C	ENSG00000084731	KIF3C	ensembl_havana	protein_coding	ENST00000455394:c.[1109A>G]; ENST00000405914:c.[1109A>G]; ENST00000264712:c.[1109A>G]; ENST00000417737:c.[1109A>G]	ENSP00000410407:p.[Gln370Arg]; ENSP00000385030:p.[Gln370Arg]; ENSP00000264712:p.[Gln370Arg]; ENSP00000393676:p.[Gln370Arg]	ENSP00000410407:p.Gln370Arg	ENST00000455394:c.1109A>G	No	Yes
2	26432662	SNV	G	T	No	1		Heterozygous	45	103	43.6893	1	21	24	0.466667	38.0889	45	103	23	22	0	0.978389	1	No	1	200	HADHA	protein_coding	HADHA	ENSG00000084754	HADHA	ensembl_havana	protein_coding	ENST00000380649:c.1072C>A	ENSP00000370023:p.Gln358Lys	ENSP00000370023:p.Gln358Lys	ENST00000380649:c.1072C>A	No	Yes
2	26477125^26477126	Insertion	-	ACT	No	3		Heterozygous	14	44	31.8182	1	11	3	0.214286	39	14	44	8	8	0	0.000567684	0.567177	No	1	200	HADHB	protein_coding	HADHB	ENSG00000138029	HADHB	ensembl_havana	protein_coding	ENST00000412805:c.[3_4insACT]; ENST00000545822:c.[-147_-146insACT]; ENST00000317799:c.[3_4insACT]; ENST00000405867:c.[3_4insACT]; ENST00000537713:c.[3_4insACT]; ENST00000425035:c.[3_4insACT]; ENST00000448743:c.[3_4insACT]	ENSP00000413103:p.[Thr2_Ile3insThr]; ENSP00000325136:p.[Thr2_Ile3insThr]; ENSP00000385411:p.[Thr2_Ile3insThr]; ENSP00000444295:p.[Thr2_Ile3insThr]; ENSP00000404633:p.[Thr2_Ile3insThr]; ENSP00000415300:p.[Thr2_Ile3insThr]	ENSP00000325136:p.Thr2_Ile3insThr	ENST00000317799:c.3_4insACT	No	Yes
2	27292460	SNV	G	A	No	1		Heterozygous	6	13	46.1538	1	3	3	0.5	36.5	6	13	6	6	0	0.879723	0.999956	No	1	200	AGBL5	protein_coding	AGBL5	ENSG00000084693	AGBL5	ensembl_havana	protein_coding	ENST00000487078:c.[2422G>A]; ENST00000360131:c.[2375G>A]	ENSP00000433830:p.[Gly808Arg]; ENSP00000353249:p.[Arg792Gln]	ENSP00000433830:p.Gly808Arg	ENST00000487078:c.2422G>A	No	Yes
2	27354372	SNV	A	G	No	1		Heterozygous	72	152	47.3684	1	51	21	0.291667	36.0139	72	152	28	29	0	0.970907	0.979227	No	1	200	PREB	protein_coding	PREB	ENSG00000138073	PREB	ensembl_havana	protein_coding	ENST00000456259:c.[391T>C]; ENST00000406567:c.[990T>C]; ENST00000430533:c.[269T>C]; ENST00000441451:c.[*218T>C]; ENST00000444452:c.[*944T>C]; ENST00000260643:c.[1164T>C]	ENSP00000397036:p.[Cys131Arg]; ENSP00000407036:p.[Val90Ala]		ENST00000260643:c.1164T>C	No	Yes
2	27424636	SNV	G	A	No	1		Heterozygous	73	151	48.3444	1	42	31	0.424658	37.1096	73	151	24	24	0	0.724522	1	No	1	200	SLC5A6	protein_coding	SLC5A6	ENSG00000138074	SLC5A6	ensembl_havana	protein_coding	ENST00000310574:c.[1442C>T]; ENST00000408041:c.[1442C>T]	ENSP00000310208:p.[Ser481Phe]; ENSP00000384853:p.[Ser481Phe]	ENSP00000310208:p.Ser481Phe	ENST00000310574:c.1442C>T	No	Yes
2	27435250	SNV	A	G	No	1		Homozygous	134	134	100	1	132	2	0.0149254	38.0224	134	134	22	28		1	1	No	1	200	SLC5A6, ATRAID	protein_coding, protein_coding	SLC5A6, ATRAID	ENSG00000138074, ENSG00000138085	SLC5A6, ATRAID	ensembl_havana, ensembl_havana	protein_coding, protein_coding	ENST00000430186:c.[-334-236T>C]; ENST00000428518:c.[-335+81T>C]; ENST00000380171:c.[179A>G]; ENST00000442731:c.[-334-236T>C]; ENST00000432106:c.[-208+450T>C]; ENST00000405489:c.[-301A>G]; ENST00000606999:c.[14A>G]	ENSP00000369518:p.[Asp60Gly]; ENSP00000476080:p.[Asp5Gly]	ENSP00000369518:p.Asp60Gly	ENST00000380171:c.179A>G	No	Yes
2	27439751	SNV	G	T	No	1		Heterozygous	185	383	48.3029	1	151	34	0.183784	35.5189	185	383	36	35	0	0.995603	0.967095	No	1	200	ATRAID	protein_coding	ATRAID	ENSG00000138085	ATRAID	ensembl_havana	protein_coding	ENST00000380171:c.[790G>T]; ENST00000606999:c.[625G>T]; ENST00000405489:c.[451G>T]	ENSP00000369518:p.[Ala264Ser]; ENSP00000476080:p.[Ala209Ser]; ENSP00000384033:p.[Ala151Ser]	ENSP00000369518:p.Ala264Ser	ENST00000380171:c.790G>T	No	Yes
2	27606234	Deletion	A	-	No	1		Heterozygous	8	267	2.99625	1	3	5	0.375	34.25	8	267	4	4	1.79	0.00948374	0.995239	No	1	200	PPM1G	protein_coding	PPM1G	ENSG00000115241	PPM1G	ensembl_havana	protein_coding	ENST00000344034:c.[1200delT]; ENST00000350803:c.[1200delT]	ENSP00000342778:p.[Ile400fs]; ENSP00000264714:p.[Ile400fs]	ENSP00000342778:p.Ile400fs	ENST00000344034:c.1200delT	No	Yes
2	28002328^28002329	Insertion	-	A	No	1		Heterozygous	6	355	1.69014	1	5	1	0.166667	39.5	6	355	4	4	0	0.752556	0.397833	Yes	7	200	MRPL33, AC110084.1	protein_coding, protein_coding	MRPL33, AC110084.1	ENSG00000243147, ENSG00000268656	MRPL33, AC110084.1	ensembl_havana, ensembl	protein_coding, protein_coding	ENST00000296102:c.[177_178insA]; ENST00000601759:c.[52-3467_52-3466insT]; ENST00000448427:c.[42-3111_42-3110insA]; ENST00000379666:c.[70_71insA]	ENSP00000296102:p.[Ile62fs]; ENSP00000368988:p.[Asn26fs]		ENST00000448427:c.42-3111_42-3110insA	No	Yes
2	30980940	SNV	C	T	No	1		Homozygous	9	9	100	1	3	6	0.333333	32.1111	9	9	9	9		1	1	No	1	200	CAPN13	protein_coding	CAPN13	ENSG00000162949	CAPN13	ensembl_havana	protein_coding	ENST00000534090:c.[838G>A]; ENST00000295055:c.[838G>A]; ENST00000458085:c.[838G>A]	ENSP00000431298:p.[Ala280Thr]; ENSP00000295055:p.[Ala280Thr]; ENSP00000416191:p.[Ala280Thr]	ENSP00000295055:p.Ala280Thr	ENST00000295055:c.838G>A	No	Yes
2	32961858	SNV	A	G	No	1		Homozygous	19	19	100	1	7	12	0.368421	39.5789	19	19	13	12		1	1	No	1	200	TTC27	protein_coding	TTC27	ENSG00000018699	TTC27	ensembl_havana	protein_coding	ENST00000433416:c.[5A>G]; ENST00000317907:c.[1427A>G]	ENSP00000410642:p.[Tyr2Cys]; ENSP00000313953:p.[Tyr476Cys]	ENSP00000313953:p.Tyr476Cys	ENST00000317907:c.1427A>G	No	Yes
2	33585796	SNV	T	C	No	1		Homozygous	7	7	100	1	3	4	0.428571	37	7	7	5	6		1	1	No	1	200	LTBP1	protein_coding	LTBP1	ENSG00000049323	LTBP1	ensembl_havana	protein_coding	ENST00000390003:c.[3158T>C]; ENST00000272273:c.[827T>C]; ENST00000354476:c.[4136T>C]; ENST00000418533:c.[3029T>C]; ENST00000404816:c.[4133T>C]; ENST00000422669:c.[641T>C]; ENST00000404525:c.[2996T>C]; ENST00000402934:c.[2990T>C]; ENST00000407925:c.[3155T>C]	ENSP00000374653:p.[Val1053Ala]; ENSP00000272273:p.[Val276Ala]; ENSP00000346467:p.[Val1379Ala]; ENSP00000393057:p.[Val1010Ala]; ENSP00000386043:p.[Val1378Ala]; ENSP00000395211:p.[Val214Ala]; ENSP00000385359:p.[Val999Ala]; ENSP00000384373:p.[Val997Ala]; ENSP00000384091:p.[Val1052Ala]	ENSP00000386043:p.Val1378Ala	ENST00000404816:c.4133T>C	No	Yes
2	36782886	SNV	G	A	No	1		Heterozygous	36	63	57.1429	1	20	16	0.444444	38.8611	36	63	20	20	0	0.893481	1	No	1	200	FEZ2	protein_coding	FEZ2	ENSG00000171055	FEZ2	ensembl_havana	protein_coding	ENST00000357996:c.[682C>T]; ENST00000451623:c.[909C>T]; ENST00000379245:c.[1066C>T]; ENST00000305852:c.[472C>T]; ENST00000432869:c.[142C>T]; ENST00000414288:c.[316C>T]; ENST00000413938:c.[*576C>T]; ENST00000441005:c.[472C>T]; ENST00000405912:c.[985C>T]	ENSP00000350685:p.[Arg228Cys]; ENSP00000368547:p.[Arg356Cys]; ENSP00000305843:p.[Arg158Cys]; ENSP00000396982:p.[Arg48Cys]; ENSP00000395619:p.[Arg106Cys]; ENSP00000415325:p.[Arg158Cys]; ENSP00000385112:p.[Arg329Cys]	ENSP00000368547:p.Arg356Cys	ENST00000379245:c.1066C>T	No	Yes
2	36825137	SNV	G	A	No	1		Homozygous	16	16	100	1	0	16	0	35.6875	16	16	10	10		1	1	No	1	200	FEZ2	protein_coding	FEZ2	ENSG00000171055	FEZ2	ensembl_havana	protein_coding	ENST00000451623:c.[149C>T]; ENST00000405912:c.[149C>T]; ENST00000379245:c.[149C>T]; ENST00000357996:c.[-37-6983C>T]	ENSP00000390985:p.[Pro50Leu]; ENSP00000385112:p.[Pro50Leu]; ENSP00000368547:p.[Pro50Leu]	ENSP00000368547:p.Pro50Leu	ENST00000379245:c.149C>T	No	Yes
2	37456032	SNV	C	T	No	1		Homozygous	37	37	100	1	16	21	0.432432	37.3243	37	37	22	21		1	1	No	1	200	CEBPZ	protein_coding	CEBPZ	ENSG00000115816	CEBPZ	ensembl_havana	protein_coding	ENST00000446769:c.[157G>A]; ENST00000234170:c.[304G>A]	ENSP00000391881:p.[Val53Ile]; ENSP00000234170:p.[Val102Ile]	ENSP00000234170:p.Val102Ile	ENST00000234170:c.304G>A	No	Yes
2	38525498	SNV	T	G	No	1		Heterozygous	13	47	27.6596	1	8	5	0.384615	22.9231	13	47	8	6	4.09	0.0288386	0.141729	No	1	200	ATL2	protein_coding	ATL2	ENSG00000119787	ATL2	ensembl_havana	protein_coding	ENST00000405384:c.[*1025A>C]; ENST00000378954:c.[1420A>C]; ENST00000546051:c.[907A>C]; ENST00000402054:c.[907A>C]; ENST00000452935:c.[1366A>C]; ENST00000419554:c.[1420A>C]; ENST00000332337:c.[1366A>C]; ENST00000406122:c.[907A>C]; ENST00000539122:c.[907A>C]	ENSP00000368237:p.[Thr474Pro]; ENSP00000438938:p.[Thr303Pro]; ENSP00000384062:p.[Thr303Pro]; ENSP00000390743:p.[Thr456Pro]; ENSP00000415336:p.[Thr474Pro]; ENSP00000333393:p.[Thr456Pro]; ENSP00000385446:p.[Thr303Pro]; ENSP00000446192:p.[Thr303Pro]	ENSP00000368237:p.Thr474Pro	ENST00000378954:c.1420A>C	No	Yes
2	38525660	SNV	C	G	No	1		Heterozygous	18	43	41.8605	1	4	14	0.222222	38.7222	18	43	10	9	0	0.396438	0.931579	No	1	200	ATL2	protein_coding	ATL2	ENSG00000119787	ATL2	ensembl_havana	protein_coding	ENST00000406122:c.[745G>C]; ENST00000539122:c.[745G>C]; ENST00000402054:c.[745G>C]; ENST00000378954:c.[1258G>C]; ENST00000405384:c.[*863G>C]; ENST00000452935:c.[1204G>C]; ENST00000546051:c.[745G>C]; ENST00000419554:c.[1258G>C]; ENST00000332337:c.[1204G>C]	ENSP00000385446:p.[Asp249His]; ENSP00000446192:p.[Asp249His]; ENSP00000384062:p.[Asp249His]; ENSP00000368237:p.[Asp420His]; ENSP00000390743:p.[Asp402His]; ENSP00000438938:p.[Asp249His]; ENSP00000415336:p.[Asp420His]; ENSP00000333393:p.[Asp402His]	ENSP00000368237:p.Asp420His	ENST00000378954:c.1258G>C	No	Yes
2	38604351	SNV	A	G	No	1		Heterozygous	12	25	48	1	0	12	0	37.3333	12	25	6	6	0	0.628599	1	No	1	200	ATL2	protein_coding	ATL2	ENSG00000119787	ATL2	ensembl_havana	protein_coding	ENST00000451483:c.[52T>C]; ENST00000378954:c.[52T>C]; ENST00000449130:c.[52T>C]; ENST00000416222:c.[52T>C]; ENST00000443098:c.[46T>C]; ENST00000539122:c.[-217T>C]; ENST00000405384:c.[52T>C]; ENST00000406122:c.[-217T>C]; ENST00000419554:c.[52T>C]; ENST00000456736:c.[52T>C]	ENSP00000404921:p.[Trp18Arg]; ENSP00000368237:p.[Trp18Arg]; ENSP00000409811:p.[Trp18Arg]; ENSP00000406004:p.[Trp18Arg]; ENSP00000410592:p.[Trp16Arg]; ENSP00000383944:p.[Trp18Arg]; ENSP00000415336:p.[Trp18Arg]; ENSP00000413216:p.[Trp18Arg]	ENSP00000368237:p.Trp18Arg	ENST00000378954:c.52T>C	No	Yes
2	39583446	SNV	A	G	No	1		Homozygous	7	7	100	1	5	2	0.285714	40	7	7	6	6		1	1	No	1	200	MAP4K3	protein_coding	MAP4K3	ENSG00000011566	MAP4K3	ensembl_havana	protein_coding	ENST00000263881:c.[189T>C]; ENST00000437968:c.[131T>C]; ENST00000484274:c.[189T>C]; ENST00000437545:c.[-1T>C]; ENST00000429397:c.[189T>C]; ENST00000341681:c.[189T>C]	ENSP00000410183:p.[Leu44Ser]		ENST00000263881:c.189T>C	No	Yes
2	42510018	SNV	A	G	No	1		Homozygous	19	19	100	1	13	6	0.315789	38.4737	19	19	12	12		1	1	No	1	200	EML4	protein_coding	EML4	ENSG00000143924	EML4	ensembl_havana	protein_coding	ENST00000402711:c.[673A>G]; ENST00000401738:c.[880A>G]; ENST00000318522:c.[847A>G]	ENSP00000385059:p.[Lys225Glu]; ENSP00000384939:p.[Lys294Glu]; ENSP00000320663:p.[Lys283Glu]	ENSP00000320663:p.Lys283Glu	ENST00000318522:c.847A>G	No	Yes
2	42515388	SNV	A	G	No	1		Homozygous	21	21	100	1	14	7	0.333333	37.619	21	21	15	14		1	1	No	1	200	EML4	protein_coding	EML4	ENSG00000143924	EML4	ensembl_havana	protein_coding	ENST00000401738:c.[1177A>G]; ENST00000318522:c.[1144A>G]; ENST00000402711:c.[970A>G]	ENSP00000384939:p.[Ile393Val]; ENSP00000320663:p.[Ile382Val]; ENSP00000385059:p.[Ile324Val]	ENSP00000320663:p.Ile382Val	ENST00000318522:c.1144A>G	No	Yes
2	42515437	SNV	A	G	No	1		Heterozygous	9	22	40.9091	1	1	8	0.111111	38.2222	9	22	8	8	0	0.277686	0.612985	No	1	200	EML4	protein_coding	EML4	ENSG00000143924	EML4	ensembl_havana	protein_coding	ENST00000401738:c.[1226A>G]; ENST00000318522:c.[1193A>G]; ENST00000402711:c.[1019A>G]	ENSP00000384939:p.[Lys409Arg]; ENSP00000320663:p.[Lys398Arg]; ENSP00000385059:p.[Lys340Arg]	ENSP00000320663:p.Lys398Arg	ENST00000318522:c.1193A>G	No	Yes
2	43518843	SNV	A	G	No	1		Heterozygous	6	16	37.5	1	5	1	0.166667	39.8333	6	16	4	4	0	0.760013	0.999394	No	1	200	THADA	protein_coding	THADA	ENSG00000115970	THADA	ensembl_havana	protein_coding	ENST00000407351:c.[2719T>C]; ENST00000405006:c.[5002T>C]; ENST00000398653:c.[*3918T>C]; ENST00000415080:c.[4045T>C]; ENST00000405975:c.[5002T>C]; ENST00000330266:c.[3189-124938T>C]	ENSP00000386112:p.[Cys907Arg]; ENSP00000385995:p.[Cys1668Arg]; ENSP00000416048:p.[Cys1349Arg]; ENSP00000386088:p.[Cys1668Arg]	ENSP00000385995:p.Cys1668Arg	ENST00000405006:c.5002T>C	No	Yes
2	44004010	SNV	T	C	No	1		Homozygous	26	26	100	1	12	14	0.461538	38.0385	26	26	14	14		1	1	No	1	200	DYNC2LI1	protein_coding	DYNC2LI1	ENSG00000138036	DYNC2LI1	ensembl_havana	protein_coding	ENST00000443170:c.[-211T>C]; ENST00000479242:c.[98T>C]; ENST00000462426:c.[178T>C]; ENST00000378587:c.[47T>C]; ENST00000605786:c.[98T>C]; ENST00000398823:c.[98T>C]; ENST00000260605:c.[98T>C]; ENST00000496980:c.[98T>C]; ENST00000406852:c.[98T>C]	ENSP00000430525:p.[Phe33Ser]; ENSP00000367850:p.[Phe16Ser]; ENSP00000474032:p.[Phe33Ser]; ENSP00000381804:p.[Phe33Ser]; ENSP00000260605:p.[Phe33Ser]; ENSP00000430356:p.[Phe33Ser]; ENSP00000385738:p.[Phe33Ser]	ENSP00000381804:p.Phe33Ser	ENST00000398823:c.98T>C	No	Yes
2	44028013	SNV	A	T	No	1		Heterozygous	11	19	57.8947	1	3	8	0.272727	36.1818	11	19	9	9	0.29	0.720301	0.709195	No	1	200	DYNC2LI1	protein_coding	DYNC2LI1	ENSG00000138036	DYNC2LI1	ensembl_havana	protein_coding	ENST00000443170:c.[310A>T]; ENST00000605786:c.[691A>T]; ENST00000378587:c.[637A>T]; ENST00000260605:c.[688A>T]	ENSP00000388941:p.[Ile104Leu]; ENSP00000474032:p.[Ile231Leu]; ENSP00000367850:p.[Ile213Leu]; ENSP00000260605:p.[Ile230Leu]	ENSP00000260605:p.Ile230Leu	ENST00000260605:c.688A>T	No	Yes
2	45640374	SNV	C	A	No	1		Heterozygous	7	14	50	1	4	3	0.428571	39.1429	7	14	5	5	0	0.310375	0.768166	No	1	200	SRBD1	protein_coding	SRBD1	ENSG00000068784	SRBD1	ensembl_havana	protein_coding	ENST00000263736:c.[2392G>T]; ENST00000535761:c.[949G>T]	ENSP00000263736:p.[Val798Phe]; ENSP00000441272:p.[Val317Phe]	ENSP00000263736:p.Val798Phe	ENST00000263736:c.2392G>T	No	Yes
2	46609572	SNV	A	C	No	1		Heterozygous	60	64	93.75	1	31	29	0.483333	39.0833	60	64	22	22		0.997207	1	No	1	200	EPAS1	protein_coding	EPAS1	ENSG00000116016	EPAS1	ensembl_havana	protein_coding	ENST00000263734:c.2296A>C	ENSP00000263734:p.Thr766Pro	ENSP00000263734:p.Thr766Pro	ENST00000263734:c.2296A>C	No	Yes
2	46609629	SNV	C	A	No	1		Heterozygous	32	95	33.6842	1	15	17	0.46875	34.1562	32	95	21	21	3.39	0.569513	1	No	1	200	EPAS1	protein_coding	EPAS1	ENSG00000116016	EPAS1	ensembl_havana	protein_coding	ENST00000263734:c.2353C>A	ENSP00000263734:p.Pro785Thr	ENSP00000263734:p.Pro785Thr	ENST00000263734:c.2353C>A	No	Yes
2	47601106	SNV	T	C	No	1		Homozygous	541	542	99.8155	1	307	234	0.432532	38.8355	541	542	53	52		1	1	No	1	200	EPCAM	protein_coding	EPCAM	ENSG00000119888	EPCAM	ensembl_havana	protein_coding	ENST00000456133:c.[428T>C]; ENST00000419334:c.[572T>C]; ENST00000405271:c.[428T>C]; ENST00000263735:c.[344T>C]	ENSP00000410675:p.[Met143Thr]; ENSP00000389028:p.[Met191Thr]; ENSP00000385476:p.[Met143Thr]; ENSP00000263735:p.[Met115Thr]	ENSP00000263735:p.Met115Thr	ENST00000263735:c.344T>C	No	Yes
2	47606137^47606138	Insertion	-	A	No	1		Heterozygous	19	674	2.81899	1	13	6	0.315789	40.2105	19	674	12	12	0	0.611133	0.548499	Yes	6	200	EPCAM	protein_coding	EPCAM	ENSG00000119888	EPCAM	ensembl_havana	protein_coding	ENST00000263735:c.[601_602insA]; ENST00000405271:c.[685_686insA]; ENST00000456133:c.[685_686insA]	ENSP00000263735:p.[Thr203fs]; ENSP00000385476:p.[Thr231fs]; ENSP00000410675:p.[Thr231fs]	ENSP00000263735:p.Thr203fs	ENST00000263735:c.601_602insA	No	Yes
2	48030691^48030692	Insertion	-	T	No	1		Heterozygous	9	127	7.08661	1	9	0	0	35.8889	9	127	4	4	0	0.00112056	0.0128491	Yes	7	200	MSH6, FBXO11	protein_coding, protein_coding	MSH6, FBXO11	ENSG00000116062, ENSG00000138081	MSH6, FBXO11	ensembl_havana, ensembl_havana	protein_coding, protein_coding	ENST00000234420:c.[3305_3306insT]; ENST00000405808:c.[169+4642_169+4643insA]; ENST00000445503:c.[*2652_*2653insT]; ENST00000540021:c.[2915_2916insT]; ENST00000538136:c.[2399_2400insT]; ENST00000434234:c.[*124+4441_*124+4442insA]	ENSP00000234420:p.[Gly1105fs]; ENSP00000446475:p.[Gly975fs]; ENSP00000438580:p.[Gly803fs]	ENSP00000234420:p.Gly1105fs	ENST00000234420:c.3305_3306insT	No	Yes
2	55771161	SNV	A	G	No	1		Homozygous	53	53	100	1	34	19	0.358491	38.0189	53	53	24	24		1	1	No	1	200	CCDC104	protein_coding	CCDC104	ENSG00000163001	CCDC104	ensembl_havana	protein_coding	ENST00000407816:c.[641A>G]; ENST00000349456:c.[728A>G]; ENST00000339012:c.[803A>G]	ENSP00000385376:p.[Asp214Gly]; ENSP00000295117:p.[Asp243Gly]; ENSP00000342699:p.[Asp268Gly]	ENSP00000295117:p.Asp243Gly	ENST00000349456:c.728A>G	No	Yes
2	55771169	SNV	A	T	No	1		Homozygous	64	64	100	1	36	28	0.4375	37.7188	64	64	29	29		1	1	No	1	200	CCDC104	protein_coding	CCDC104	ENSG00000163001	CCDC104	ensembl_havana	protein_coding	ENST00000407816:c.[649A>T]; ENST00000339012:c.[811A>T]; ENST00000349456:c.[736A>T]	ENSP00000385376:p.[Ile217Phe]; ENSP00000342699:p.[Ile271Phe]; ENSP00000295117:p.[Ile246Phe]	ENSP00000295117:p.Ile246Phe	ENST00000349456:c.736A>T	No	Yes
2	55805440	SNV	T	C	No	1		Homozygous	14	14	100	1	7	7	0.5	39.2143	14	14	10	9		1	1	No	1	200	SMEK2	protein_coding	SMEK2	ENSG00000138041	SMEK2	ensembl_havana	protein_coding	ENST00000272313:c.[1469-948A>G]; ENST00000345102:c.[1507A>G]; ENST00000407823:c.[1469-948A>G]	ENSP00000339769:p.Ile503Val		ENST00000272313:c.1469-948A>G	No	Yes
2	55872538	SNV	T	C	No	1		Homozygous	62	62	100	1	31	31	0.5	37.4032	62	62	28	27		1	1	No	1	200	PNPT1	protein_coding	PNPT1	ENSG00000138035	PNPT1	ensembl_havana	protein_coding	ENST00000447944:c.[1768A>G]; ENST00000415374:c.[1768A>G]; ENST00000260604:c.[*1323A>G]	ENSP00000400646:p.[Asn590Asp]; ENSP00000393953:p.[Asn590Asp]	ENSP00000400646:p.Asn590Asp	ENST00000447944:c.1768A>G	No	Yes
2	62099239^62099240	Insertion	-	T	No	1		Heterozygous	16	517	3.09478	1	9	7	0.4375	37	16	517	7	8	0	0.0268945	0.574548	Yes	6	200	CCT4, AC107081.5	protein_coding, antisense	CCT4, AC107081.5	ENSG00000115484, ENSG00000236498	CCT4, AC107081.5	ensembl_havana, havana	protein_coding, antisense	ENST00000394440:c.[1468_1469insA]; ENST00000538252:c.[1300_1301insA]; ENST00000544079:c.[1378_1379insA]; ENST00000544185:c.[1018_1019insA]	ENSP00000377958:p.[Thr490fs]; ENSP00000442174:p.[Thr434fs]; ENSP00000443061:p.[Thr460fs]; ENSP00000443451:p.[Thr340fs]	ENSP00000377958:p.Thr490fs	ENST00000394440:c.1468_1469insA	No	Yes
2	64779509	SNV	G	A	No	1		Heterozygous	19	29	65.5172	1	12	7	0.368421	37.4211	19	29	12	12	0	0.964406	0.998607	No	1	200	AFTPH	protein_coding	AFTPH	ENSG00000119844	AFTPH	ensembl_havana	protein_coding	ENST00000409933:c.[901G>A]; ENST00000422803:c.[901G>A]; ENST00000238856:c.[901G>A]; ENST00000238855:c.[901G>A]	ENSP00000387071:p.[Glu301Lys]; ENSP00000397726:p.[Glu301Lys]; ENSP00000238856:p.[Glu301Lys]; ENSP00000238855:p.[Glu301Lys]	ENSP00000397726:p.Glu301Lys	ENST00000422803:c.901G>A	No	Yes
2	67631831	SNV	G	A	No	1		Heterozygous	6	10	60	1	3	3	0.5	39.3333	6	10	4	4	0	0.452898	0.979032	No	1	200	ETAA1	protein_coding	ETAA1	ENSG00000143971	ETAA1	ensembl_havana	protein_coding	ENST00000272342:c.2017G>A	ENSP00000272342:p.Glu673Lys	ENSP00000272342:p.Glu673Lys	ENST00000272342:c.2017G>A	No	Yes
2	67632125	SNV	C	T	No	1		Homozygous	15	15	100	1	13	2	0.133333	38.2	15	15	9	9		1	1	No	1	200	ETAA1	protein_coding	ETAA1	ENSG00000143971	ETAA1	ensembl_havana	protein_coding	ENST00000272342:c.2311C>T	ENSP00000272342:p.Pro771Ser	ENSP00000272342:p.Pro771Ser	ENST00000272342:c.2311C>T	No	Yes
2	68364478	SNV	T	C	No	1		Homozygous	22	22	100	1	12	10	0.454545	38.5455	22	22	17	17		1	1	No	1	200	WDR92, RP11-474G23.1	protein_coding, protein_coding	WDR92, RP11-474G23.1	ENSG00000243667, ENSG00000273398	WDR92, RP11-474G23.1	ensembl_havana, havana	protein_coding, protein_coding	ENST00000409164:c.[721A>G]; ENST00000295121:c.[721A>G]; ENST00000406334:c.[*738A>G]; ENST00000457114:c.[130A>G]; ENST00000406245:c.[418A>G]	ENSP00000386746:p.[Met241Val]; ENSP00000295121:p.[Met241Val]; ENSP00000410301:p.[Met44Val]; ENSP00000384518:p.[Met140Val]	ENSP00000295121:p.Met241Val	ENST00000295121:c.721A>G	No	Yes
2	68385097	SNV	A	G	No	1		Homozygous	50	51	98.0392	1	49	1	0.02	38.8	50	51	16	16		0.999927	1	No	1	200	RP11-474G23.1, PNO1	protein_coding, protein_coding	RP11-474G23.1, PNO1	ENSG00000273398, ENSG00000115946	RP11-474G23.1, PNO1	havana, ensembl_havana	protein_coding, protein_coding	ENST00000430742:c.[31A>G]; ENST00000263657:c.[31A>G]; ENST00000406334:c.[593T>C]	ENSP00000405892:p.[Arg11Gly]; ENSP00000263657:p.[Arg11Gly]; ENSP00000384974:p.[Leu198Pro]	ENSP00000384974:p.Leu198Pro	ENST00000406334:c.593T>C	No	Yes
2	68772434	SNV	T	C	No	1		Homozygous	10	11	90.9091	1	8	2	0.2	39.4	10	11	7	7		0.975056	1	No	1	200	APLF	protein_coding	APLF	ENSG00000169621	APLF	ensembl_havana	protein_coding	ENST00000529851:c.[*650T>C]; ENST00000445692:c.[*534T>C]; ENST00000303795:c.[1276T>C]	ENSP00000307004:p.Ser426Pro		ENST00000445692:c.*534T>C	No	Yes
2	69659126	SNV	A	T	No	1		Heterozygous	9	18	50	1	3	6	0.333333	36.5556	9	18	8	8	0.12	0.993396	0.992093	No	1	200	NFU1	protein_coding	NFU1	ENSG00000169599	NFU1	ensembl_havana	protein_coding	ENST00000438184:c.[2T>A]; ENST00000410022:c.[74T>A]; ENST00000394305:c.[-214T>A]; ENST00000484177:c.[-214T>A]; ENST00000450796:c.[-214T>A]; ENST00000419370:c.[2T>A]; ENST00000303698:c.[2T>A]	ENSP00000393338:p.[Met1?]; ENSP00000387219:p.[Met25Lys]; ENSP00000405495:p.[Met1?]; ENSP00000306965:p.[Met1?]	ENSP00000387219:p.Met25Lys	ENST00000410022:c.74T>A	No	Yes
2	71163086	SNV	T	C	No	1		Heterozygous	69	99	69.697	1	68	1	0.0144928	37.8551	69	99	23	23	0	0.986295	0.857141	No	1	200	ATP6V1B1	protein_coding	ATP6V1B1	ENSG00000116039	ATP6V1B1	ensembl_havana	protein_coding	ENST00000432367:c.[2T>C]; ENST00000412314:c.[2T>C]; ENST00000234396:c.[2T>C]	ENSP00000405114:p.[Met1?]; ENSP00000388353:p.[Met1?]; ENSP00000234396:p.[Met1?]	ENSP00000405114:p.Met1?	ENST00000432367:c.2T>C	No	Yes
2	71351403	SNV	C	A	No	1		Heterozygous	20	29	68.9655	1	13	7	0.35	38.05	20	29	16	16	2.57	0.91257	0.988875	No	1	200	MCEE	protein_coding	MCEE	ENSG00000124370	MCEE	ensembl_havana	protein_coding	ENST00000413592:c.[84+95G>T]; ENST00000244217:c.[311G>T]; ENST00000486135:c.[26G>T]; ENST00000494660:c.[26G>T]	ENSP00000244217:p.[Arg104Leu]; ENSP00000441569:p.[Arg9Leu]; ENSP00000437361:p.[Arg9Leu]	ENSP00000437361:p.Arg9Leu	ENST00000494660:c.26G>T	No	Yes
2	71360282	SNV	G	A	No	1		Heterozygous	18	27	66.6667	1	7	11	0.388889	37.2222	18	27	15	15	0.78	0.995583	0.993131	No	1	200	MPHOSPH10	protein_coding	MPHOSPH10	ENSG00000124383	MPHOSPH10	ensembl_havana	protein_coding	ENST00000498451:c.[344G>A]; ENST00000244230:c.[344G>A]	ENSP00000475545:p.[Arg115His]; ENSP00000244230:p.[Arg115His]	ENSP00000244230:p.Arg115His	ENST00000244230:c.344G>A	No	Yes
2	71371558^71371559	Insertion	-	A	No	1		Heterozygous	7	54	12.963	1	3	4	0.428571	40.2857	7	54	6	6	0	0.481633	0.931532	Yes	6	200	MPHOSPH10	protein_coding	MPHOSPH10	ENSG00000124383	MPHOSPH10	ensembl_havana	protein_coding	ENST00000244230:c.1447_1448insA	ENSP00000244230:p.Thr485fs	ENSP00000244230:p.Thr485fs	ENST00000244230:c.1447_1448insA	No	Yes
2	71654446^71654447	Insertion	-	A	No	1		Heterozygous	6	44	13.6364	1	3	3	0.5	39.5	6	44	5	6	0	0.344492	0.887931	Yes	6	200	ZNF638	protein_coding	ZNF638	ENSG00000075292	ZNF638	ensembl_havana	protein_coding	ENST00000409407:c.[2267_2268insA]; ENST00000264447:c.[5447_5448insA]; ENST00000355812:c.[*802_*803insA]; ENST00000409544:c.[5447_5448insA]	ENSP00000386813:p.[Thr759fs]; ENSP00000264447:p.[Thr1819fs]; ENSP00000386433:p.[Thr1819fs]	ENSP00000386433:p.Thr1819fs	ENST00000409544:c.5447_5448insA	No	Yes
2	73478414	SNV	G	A	No	1		Heterozygous	127	443	28.6682	1	76	51	0.401575	38.2283	127	443	41	41	0	0.303579	0.386432	No	1	200	CCT7	protein_coding	CCT7	ENSG00000135624	CCT7	ensembl_havana	protein_coding	ENST00000258091:c.[1264G>A]; ENST00000537131:c.[964G>A]; ENST00000540468:c.[1003G>A]; ENST00000398422:c.[652G>A]; ENST00000538797:c.[880G>A]; ENST00000539919:c.[1132G>A]	ENSP00000258091:p.[Asp422Asn]; ENSP00000444379:p.[Asp322Asn]; ENSP00000442058:p.[Asp335Asn]; ENSP00000381456:p.[Asp218Asn]; ENSP00000438462:p.[Asp294Asn]; ENSP00000437824:p.[Asp378Asn]	ENSP00000437824:p.Asp378Asn	ENST00000539919:c.1132G>A	No	Yes
2	73746923	SNV	C	T	No	1		Homozygous	9	9	100	1	8	1	0.111111	37	9	9	6	6		1	1	No	1	200	ALMS1	protein_coding	ALMS1	ENSG00000116127	ALMS1	ensembl_havana	protein_coding	ENST00000264448:c.[9558C>T]; ENST00000423048:c.[3052C>T]; ENST00000409009:c.[9432C>T]	ENSP00000399833:p.[Pro1018Ser]		ENST00000264448:c.9558C>T	No	Yes
2	74007136	SNV	T	C	No	1		Heterozygous	8	12	66.6667	1	3	5	0.375	38.875	8	12	6	7	0	0.804304	0.999357	No	1	200	DUSP11	protein_coding	DUSP11	ENSG00000144048	DUSP11	ensembl_havana	protein_coding	ENST00000377706:c.[-35A>G]; ENST00000272444:c.[107A>G]; ENST00000443070:c.[107A>G]	ENSP00000272444:p.[Asp36Gly]; ENSP00000413444:p.[Asp36Gly]	ENSP00000413444:p.Asp36Gly	ENST00000443070:c.107A>G	No	Yes
2	74007164	SNV	C	A	No	1		Heterozygous	26	33	78.7879	1	1	25	0.0384615	38.4615	26	33	13	13	0	0.926469	0.995099	No	1	200	DUSP11	protein_coding	DUSP11	ENSG00000144048	DUSP11	ensembl_havana	protein_coding	ENST00000443070:c.[79G>T]; ENST00000272444:c.[79G>T]; ENST00000377706:c.[-63G>T]	ENSP00000413444:p.[Glu27*]; ENSP00000272444:p.[Glu27*]	ENSP00000413444:p.Glu27*	ENST00000443070:c.79G>T	No	Yes
2	74173847	Deletion	C	-	No	1		Heterozygous	20	180	11.1111	1	13	7	0.35	37.45	20	180	7	7	0	0.00045858	0.310857	No	1	200	DGUOK	protein_coding	DGUOK	ENSG00000114956	DGUOK	ensembl_havana	protein_coding	ENST00000348222:c.[257delC]; ENST00000264093:c.[257delC]; ENST00000356837:c.[191delC]; ENST00000418996:c.[144delC]	ENSP00000306964:p.[Cys87fs]; ENSP00000264093:p.[Cys87fs]; ENSP00000349294:p.[Cys65fs]; ENSP00000408209:p.[Leu49fs]	ENSP00000264093:p.Cys87fs	ENST00000264093:c.257delC	No	Yes
2	74173850	SNV	G	C	No	1		Heterozygous	20	156	12.8205	1	13	7	0.35	38.2	20	156	7	7	0	0.000860776	0.445581	No	1	200	DGUOK	protein_coding	DGUOK	ENSG00000114956	DGUOK	ensembl_havana	protein_coding	ENST00000356837:c.[194G>C]; ENST00000348222:c.[260G>C]; ENST00000264093:c.[260G>C]; ENST00000418996:c.[147G>C]	ENSP00000349294:p.[Cys65Ser]; ENSP00000306964:p.[Cys87Ser]; ENSP00000264093:p.[Cys87Ser]	ENSP00000264093:p.Cys87Ser	ENST00000264093:c.260G>C	No	Yes
2	74174031	SNV	C	G	No	1		Heterozygous	9	131	6.87023	1	2	7	0.222222	40	9	131	5	5	0	0.157224	0.916387	No	1	200	DGUOK	protein_coding	DGUOK	ENSG00000114956	DGUOK	ensembl_havana	protein_coding	ENST00000264093:c.[441C>G]; ENST00000348222:c.[441C>G]; ENST00000418996:c.[*58C>G]; ENST00000356837:c.[375C>G]	ENSP00000264093:p.[Asp147Glu]; ENSP00000306964:p.[Asp147Glu]; ENSP00000349294:p.[Asp125Glu]	ENSP00000264093:p.Asp147Glu	ENST00000264093:c.441C>G	No	Yes
2	74597937	SNV	G	T	No	1		Heterozygous	25	53	47.1698	1	21	4	0.16	37.84	25	53	17	17	0	0.974204	1	No	1	200	DCTN1	protein_coding	DCTN1	ENSG00000204843	DCTN1	ensembl_havana	protein_coding	ENST00000409868:c.[808C>A]; ENST00000361874:c.[859C>A]; ENST00000409240:c.[748C>A]; ENST00000409438:c.[457C>A]; ENST00000409567:c.[799C>A]; ENST00000407639:c.[457C>A]; ENST00000434055:c.[748C>A]; ENST00000394003:c.[838C>A]	ENSP00000387327:p.[Leu270Met]; ENSP00000354791:p.[Leu287Met]; ENSP00000386406:p.[Leu250Met]; ENSP00000387270:p.[Leu153Met]; ENSP00000386843:p.[Leu267Met]; ENSP00000384844:p.[Leu153Met]; ENSP00000416711:p.[Leu250Met]; ENSP00000377571:p.[Leu280Met]	ENSP00000354791:p.Leu287Met	ENST00000361874:c.859C>A	No	Yes
2	74687550	Deletion	T	-	No	1		Heterozygous	10	57	17.5439	1	3	7	0.3	34.6	10	57	5	6		0.018178	0.623988	Yes	7	200	INO80B, WBP1	protein_coding, protein_coding	INO80B, WBP1	ENSG00000115274, ENSG00000239779	INO80B, WBP1	ensembl_havana, ensembl_havana	protein_coding, protein_coding	ENST00000441673:c.[*436delT]; ENST00000409737:c.[543delT]; ENST00000233615:c.[552delT]; ENST00000428943:c.[729delT]; ENST00000393972:c.[654delT]; ENST00000452361:c.[*458delT]	ENSP00000386812:p.[His182fs]; ENSP00000233615:p.[His185fs]; ENSP00000408816:p.[His244fs]; ENSP00000377542:p.[His219fs]		ENST00000452361:c.*458delT	No	Yes
2	74688884	SNV	G	A	No	1		Heterozygous	17	69	24.6377	1	13	4	0.235294	35.8235	17	69	12	13	0	0.173644	0.724973	No	1	200	MOGS	protein_coding	MOGS	ENSG00000115275	MOGS	ensembl_havana	protein_coding	ENST00000233616:c.[2032C>T]; ENST00000409065:c.[*1212C>T]; ENST00000452063:c.[1714C>T]	ENSP00000233616:p.[Arg678Trp]; ENSP00000388201:p.[Arg572Trp]	ENSP00000233616:p.Arg678Trp	ENST00000233616:c.2032C>T	No	Yes
2	74690039	SNV	G	A	No	1		Homozygous	44	44	100	1	24	20	0.454545	36.0909	44	44	20	17		1	1	No	1	200	MOGS	protein_coding	MOGS	ENSG00000115275	MOGS	ensembl_havana	protein_coding	ENST00000448666:c.[559C>T]; ENST00000452063:c.[559C>T]; ENST00000535045:c.[*347C>T]; ENST00000409065:c.[*57C>T]; ENST00000233616:c.[877C>T]	ENSP00000410992:p.[Pro187Ser]; ENSP00000388201:p.[Pro187Ser]; ENSP00000233616:p.[Pro293Ser]	ENSP00000233616:p.Pro293Ser	ENST00000233616:c.877C>T	No	Yes
2	74690378	SNV	C	T	No	1		Homozygous	57	57	100	1	23	34	0.403509	37.0175	57	57	27	24		1	1	No	1	200	MOGS	protein_coding	MOGS	ENSG00000115275	MOGS	ensembl_havana	protein_coding	ENST00000448666:c.[397G>A]; ENST00000535045:c.[*8G>A]; ENST00000233616:c.[715G>A]; ENST00000409065:c.[586+129G>A]; ENST00000452063:c.[397G>A]; ENST00000414701:c.[358G>A]	ENSP00000410992:p.[Asp133Asn]; ENSP00000233616:p.[Asp239Asn]; ENSP00000388201:p.[Asp133Asn]; ENSP00000396298:p.[Asp120Asn]	ENSP00000233616:p.Asp239Asn	ENST00000233616:c.715G>A	No	Yes
2	74699778	SNV	C	A	No	1		Homozygous	32	32	100	1	7	25	0.21875	37.3125	32	32	16	14		1	1	No	1	200	MRPL53, CCDC142	protein_coding, protein_coding	MRPL53, CCDC142	ENSG00000204822, ENSG00000135637	MRPL53, CCDC142	ensembl_havana, ensembl_havana	protein_coding, protein_coding	ENST00000409710:c.[10G>T]; ENST00000454193:c.[*144G>T]; ENST00000258105:c.[10G>T]	ENSP00000386920:p.[Ala4Ser]; ENSP00000258105:p.[Ala4Ser]		ENST00000454193:c.*144G>T	No	Yes
2	74867194	SNV	T	C	No	1		Homozygous	7	7	100	1	2	5	0.285714	39	7	7	7	7		1	1	No	1	200	M1AP	protein_coding	M1AP	ENSG00000159374	M1AP	ensembl_havana	protein_coding	ENST00000358434:c.[-638A>G]; ENST00000290536:c.[209A>G]; ENST00000536235:c.[209A>G]; ENST00000438226:c.[209A>G]; ENST00000422394:c.[209A>G]; ENST00000409585:c.[209A>G]; ENST00000421985:c.[209A>G]	ENSP00000290536:p.[Gln70Arg]; ENSP00000445662:p.[Gln70Arg]; ENSP00000408713:p.[Gln70Arg]; ENSP00000406107:p.[Gln70Arg]; ENSP00000386793:p.[Gln70Arg]; ENSP00000414882:p.[Gln70Arg]	ENSP00000290536:p.Gln70Arg	ENST00000290536:c.209A>G	No	Yes
2	75116527	SNV	G	A	No	1		Heterozygous	8	15	53.3333	1	0	8	0	38.75	8	15	5	5	0	0.305892	0.477088	No	1	200	HK2	protein_coding	HK2	ENSG00000159399	HK2	ensembl_havana	protein_coding	ENST00000409174:c.[2447G>A]; ENST00000290573:c.[2531G>A]	ENSP00000387140:p.[Arg816Lys]; ENSP00000290573:p.[Arg844Lys]	ENSP00000290573:p.Arg844Lys	ENST00000290573:c.2531G>A	No	Yes
2	75185856	SNV	G	T	No	1		Heterozygous	15	63	23.8095	1	15	0	0	27.4667	15	63	9	9	3.22	0.554671	1	No	1	200	POLE4	protein_coding	POLE4	ENSG00000115350	POLE4	ensembl_havana	protein_coding	ENST00000483063:c.50G>T	ENSP00000420176:p.Gly17Val	ENSP00000420176:p.Gly17Val	ENST00000483063:c.50G>T	No	Yes
2	75907351	SNV	T	C	No	1		Heterozygous	13	20	65	1	8	5	0.384615	37.9231	13	20	9	9	0	0.993403	0.993015	No	1	200	MRPL19, GCFC2	protein_coding, protein_coding	MRPL19, GCFC2	ENSG00000115364, ENSG00000005436	MRPL19, GCFC2	ensembl_havana, ensembl_havana	protein_coding, protein_coding	ENST00000321027:c.[1780A>G]; ENST00000358788:c.[*31+373T>C]; ENST00000427862:c.[67-6705A>G]; ENST00000409857:c.[1666A>G]; ENST00000541687:c.[*899A>G]; ENST00000453233:c.[*18-10409T>C]; ENST00000472230:c.[*1570A>G]	ENSP00000318690:p.[Thr594Ala]; ENSP00000386552:p.[Thr556Ala]	ENSP00000318690:p.Thr594Ala	ENST00000321027:c.1780A>G	No	Yes
2	75937801	SNV	C	T	No	1		Heterozygous	6	8	75	1	3	3	0.5	33.8333	6	8	4	5	0	0.733271	0.959675	No	1	200	GCFC2	protein_coding	GCFC2	ENSG00000005436	GCFC2	ensembl_havana	protein_coding	ENST00000321027:c.[181G>A]; ENST00000409857:c.[181G>A]; ENST00000442309:c.[181G>A]; ENST00000470503:c.[181G>A]; ENST00000541687:c.[181G>A]	ENSP00000318690:p.[Val61Ile]; ENSP00000386552:p.[Val61Ile]; ENSP00000415831:p.[Val61Ile]; ENSP00000474481:p.[Val61Ile]; ENSP00000437767:p.[Val61Ile]	ENSP00000318690:p.Val61Ile	ENST00000321027:c.181G>A	No	Yes
2	85622059	SNV	T	C	No	1		Heterozygous	78	228	34.2105	1	38	40	0.487179	36.9359	78	228	29	28	0	0.928697	1	No	1	200	CAPG	protein_coding	CAPG	ENSG00000042493	CAPG	ensembl_havana	protein_coding	ENST00000409670:c.[1004A>G]; ENST00000453973:c.[269A>G]; ENST00000409921:c.[959A>G]; ENST00000263867:c.[1004A>G]; ENST00000409724:c.[1004A>G]	ENSP00000386315:p.[His335Arg]; ENSP00000397381:p.[His90Arg]; ENSP00000387063:p.[His320Arg]; ENSP00000263867:p.[His335Arg]; ENSP00000386965:p.[His335Arg]	ENSP00000263867:p.His335Arg	ENST00000263867:c.1004A>G	No	Yes
2	85780536	SNV	C	T	No	1		Homozygous	12	12	100	1	4	8	0.333333	38.5	12	12	9	6		1	1	No	1	200	GGCX	protein_coding	GGCX	ENSG00000115486	GGCX	ensembl_havana	protein_coding	ENST00000233838:c.[974G>A]; ENST00000430215:c.[803G>A]	ENSP00000233838:p.[Arg325Gln]; ENSP00000408045:p.[Arg268Gln]	ENSP00000233838:p.Arg325Gln	ENST00000233838:c.974G>A	No	Yes
2	85822962	SNV	G	C	No	1		Heterozygous	74	113	65.4867	1	64	10	0.135135	38.3919	74	113	25	25	0	0.595091	0.998944	No	1	200	RNF181	protein_coding	RNF181	ENSG00000168894	RNF181	ensembl_havana	protein_coding	ENST00000456023:c.[22G>C]; ENST00000306368:c.[76G>C]; ENST00000414390:c.[76G>C]; ENST00000443647:c.[76G>C]; ENST00000441634:c.[76G>C]	ENSP00000415246:p.[Glu8Gln]; ENSP00000306906:p.[Glu26Gln]; ENSP00000397109:p.[Glu26Gln]; ENSP00000391326:p.[Glu26Gln]; ENSP00000412025:p.[Glu26Gln]	ENSP00000412025:p.Glu26Gln	ENST00000441634:c.76G>C	No	Yes
2	85824251	SNV	T	C	No	1		Homozygous	80	80	100	1	23	57	0.2875	37.6875	80	80	19	18		1	1	No	1	200	RNF181	protein_coding	RNF181	ENSG00000168894	RNF181	ensembl_havana	protein_coding	ENST00000443647:c.[*80T>C]; ENST00000441634:c.[352T>C]; ENST00000306368:c.[352T>C]; ENST00000456023:c.[339T>C]	ENSP00000412025:p.[Tyr118His]; ENSP00000306906:p.[Tyr118His]	ENSP00000412025:p.Tyr118His	ENST00000441634:c.352T>C	No	Yes
2	86317037	SNV	G	C	No	1		Homozygous	9	9	100	1	6	3	0.333333	39.3333	9	9	6	6		1	1	No	1	200	POLR1A	protein_coding	POLR1A	ENSG00000068654	POLR1A	ensembl_havana	protein_coding	ENST00000263857:c.[448C>G]; ENST00000409024:c.[93C>G]; ENST00000424089:c.[93C>G]; ENST00000409681:c.[448C>G]	ENSP00000263857:p.[Pro150Ala]; ENSP00000386423:p.[Ile31Met]; ENSP00000397321:p.[Ile31Met]; ENSP00000386300:p.[Pro150Ala]	ENSP00000263857:p.Pro150Ala	ENST00000263857:c.448C>G	No	Yes
2	88074545	SNV	G	C	No	1		Heterozygous	6	18	33.3333	1	3	3	0.5	36.3333	6	18	2	2	1.76	0.0605189	1	No	1	200	RGPD2	protein_coding	RGPD2	ENSG00000185304	RGPD2	ensembl_havana	protein_coding	ENST00000420840:c.[4934C>G]; ENST00000327544:c.[2729C>G]; ENST00000398146:c.[4958C>G]	ENSP00000413275:p.[Ser1645Cys]; ENSP00000332727:p.[Ser910Cys]; ENSP00000381214:p.[Ser1653Cys]	ENSP00000381214:p.Ser1653Cys	ENST00000398146:c.4958C>G	No	Yes
2	88472791	SNV	G	A	No	1		Homozygous	13	13	100	1	8	5	0.384615	37.2308	13	13	13	9		1	1	No	1	200	THNSL2	protein_coding	THNSL2	ENSG00000144115	THNSL2	ensembl_havana	protein_coding	ENST00000419759:c.[122G>A]; ENST00000449349:c.[26G>A]; ENST00000343544:c.[122G>A]; ENST00000358591:c.[122G>A]; ENST00000377254:c.[122G>A]; ENST00000324166:c.[122G>A]; ENST00000402102:c.[122G>A]	ENSP00000391300:p.[Gly41Glu]; ENSP00000407553:p.[Gly9Glu]; ENSP00000339563:p.[Gly41Glu]; ENSP00000351402:p.[Gly41Glu]; ENSP00000366464:p.[Gly41Glu]; ENSP00000327323:p.[Gly41Glu]; ENSP00000384475:p.[Gly41Glu]	ENSP00000327323:p.Gly41Glu	ENST00000324166:c.122G>A	No	Yes
2	95947085	SNV	A	G	No	1		Homozygous	91	91	100	1	28	63	0.307692	37.989	91	91	28	29		1	1	No	1	200	PROM2	protein_coding	PROM2	ENSG00000155066	PROM2	ensembl_havana	protein_coding	ENST00000542147:c.[1523A>G]; ENST00000431567:c.[*1004A>G]; ENST00000317668:c.[1523A>G]; ENST00000317620:c.[1523A>G]; ENST00000403131:c.[1523A>G]	ENSP00000442542:p.[Gln508Arg]; ENSP00000318520:p.[Gln508Arg]; ENSP00000318270:p.[Gln508Arg]; ENSP00000385716:p.[Gln508Arg]	ENSP00000318270:p.Gln508Arg	ENST00000317620:c.1523A>G	No	Yes
2	96933409^96933410	Insertion	-	T	No	1		Heterozygous	6	73	8.21918	1	6	0	0	40.5	6	73	4	3	0	0.00639618	0.103314	No	1	200	CIAO1	protein_coding	CIAO1	ENSG00000144021	CIAO1	ensembl_havana	protein_coding	ENST00000488633:c.335_336insT	ENSP00000418287:p.Trp113fs	ENSP00000418287:p.Trp113fs	ENST00000488633:c.335_336insT	No	Yes
2	98277090	SNV	T	C	No	1		Heterozygous	27	47	57.4468	1	14	13	0.481481	35.2593	27	47	16	14	0.33	0.905098	1	No	1	200	ACTR1B	protein_coding	ACTR1B	ENSG00000115073	ACTR1B	ensembl_havana	protein_coding	ENST00000289228:c.133A>G	ENSP00000289228:p.Met45Val	ENSP00000289228:p.Met45Val	ENST00000289228:c.133A>G	No	Yes
2	99172244	SNV	A	G	No	1		Homozygous	6	6	100	1	5	1	0.166667	36.3333	6	6	5	5		1	1	No	1	200	INPP4A	protein_coding	INPP4A	ENSG00000040933	INPP4A	ensembl_havana	protein_coding	ENST00000409540:c.[1720+90A>G]; ENST00000409463:c.[232-9936A>G]; ENST00000074304:c.[1810A>G]; ENST00000409016:c.[1720+90A>G]; ENST00000523221:c.[1810A>G]; ENST00000409851:c.[1795A>G]; ENST00000545415:c.[1720+90A>G]	ENSP00000074304:p.[Thr604Ala]; ENSP00000427722:p.[Thr604Ala]; ENSP00000386777:p.[Thr599Ala]		ENST00000409016:c.1720+90A>G	No	Yes
2	99802662	SNV	C	T	No	1		Heterozygous	21	33	63.6364	1	21	0	0	38.8095	21	33	10	9	0.12	0.854124	0.755374	No	1	200	C2orf15, MRPL30, MRPL30	protein_coding, protein_coding, protein_coding	C2orf15, MRPL30, MRPL30	ENSG00000241962, ENSG00000273155, ENSG00000185414	C2orf15, MRPL30, MRPL30	ensembl_havana, havana, havana	protein_coding, protein_coding, protein_coding	ENST00000338148:c.[-5C>T]; ENST00000410042:c.[-5C>T]; ENST00000409145:c.[-5C>T]; ENST00000409841:c.[-5C>T]; ENST00000512183:c.[-5C>T]; ENST00000424491:c.[86C>T]	ENSP00000390891:p.Thr29Ile		ENST00000338148:c.-5C>T	No	Yes
2	99812070	SNV	G	A	No	1		Heterozygous	11	35	31.4286	1	5	6	0.454545	38.2727	11	35	10	9	0.77	0.99463	1	No	1	200	C2orf15, MRPL30	protein_coding, protein_coding	C2orf15, MRPL30	ENSG00000241962, ENSG00000185414	C2orf15, MRPL30	ensembl_havana, havana	protein_coding, protein_coding	ENST00000512183:c.[388G>A]; ENST00000338148:c.[388G>A]; ENST00000424491:c.[478G>A]; ENST00000409841:c.[388G>A]	ENSP00000420959:p.[Ala130Thr]; ENSP00000338057:p.[Ala130Thr]; ENSP00000390891:p.[Ala160Thr]; ENSP00000386752:p.[Ala130Thr]	ENSP00000338057:p.Ala130Thr	ENST00000338148:c.388G>A	No	Yes
2	99977673^99977674	Insertion	-	A	No	1		Heterozygous	7	42	16.6667	1	5	2	0.285714	40	7	42	5	3	0	0.186172	0.761375	Yes	6	200	EIF5B	protein_coding	EIF5B	ENSG00000158417	EIF5B	ensembl_havana	protein_coding	ENST00000289371:c.309_310insA	ENSP00000289371:p.Gln106fs	ENSP00000289371:p.Gln106fs	ENST00000289371:c.309_310insA	No	Yes
2	99992822	SNV	A	C	No	1		Heterozygous	59	87	67.8161	1	30	29	0.491525	38.0169	59	87	24	23	1.55	0.980584	1	No	1	200	EIF5B	protein_coding	EIF5B	ENSG00000158417	EIF5B	ensembl_havana	protein_coding	ENST00000289371:c.1565A>C	ENSP00000289371:p.Lys522Thr	ENSP00000289371:p.Lys522Thr	ENST00000289371:c.1565A>C	No	Yes
2	100055506	SNV	A	G	No	1		Heterozygous	6	11	54.5455	1	5	1	0.166667	37.5	6	11	5	6	0	0.71408	0.605227	No	1	200	REV1	protein_coding	REV1	ENSG00000135945	REV1	ensembl_havana	protein_coding	ENST00000258428:c.[770T>C]; ENST00000413697:c.[*717T>C]; ENST00000393445:c.[770T>C]	ENSP00000258428:p.[Phe257Ser]; ENSP00000377091:p.[Phe257Ser]	ENSP00000258428:p.Phe257Ser	ENST00000258428:c.770T>C	No	Yes
2	101591304	SNV	A	G	No	1		Homozygous	10	10	100	1	5	5	0.5	35.5	10	10	10	10		1	1	No	1	200	NPAS2, AC016738.3	protein_coding, antisense	NPAS2, AC016738.3	ENSG00000170485, ENSG00000230140	NPAS2, AC016738.3	ensembl_havana, havana	protein_coding, antisense	ENST00000542504:c.[1375A>G]; ENST00000335681:c.[1180A>G]	ENSP00000438428:p.[Thr459Ala]; ENSP00000338283:p.[Thr394Ala]	ENSP00000338283:p.Thr394Ala	ENST00000335681:c.1180A>G	No	Yes
2	101624332^101624333	Insertion	-	AAG	No	3		Heterozygous	13	45	28.8889	1	6	7	0.461538	39.2564	13	45	10	10	0	0.0175279	0.907204	No	1	200	RPL31, TBC1D8	protein_coding, protein_coding	RPL31, TBC1D8	ENSG00000071082, ENSG00000204634	RPL31, TBC1D8	ensembl_havana, ensembl_havana	protein_coding, protein_coding	ENST00000409038:c.[346+1799_346+1800insAAG]; ENST00000409028:c.[346+1799_346+1800insAAG]; ENST00000409318:c.[3418_3419insCTT]; ENST00000376840:c.[3373_3374insCTT]; ENST00000441435:c.[307+1799_307+1800insAAG]; ENST00000409650:c.[346+1799_346+1800insAAG]	ENSP00000386856:p.[Thr1139_Phe1140insSer]; ENSP00000366036:p.[Thr1124_Phe1125insSer]	ENSP00000386856:p.Thr1139_Phe1140insSer	ENST00000409318:c.3418_3419insCTT	No	Yes
2	101624471	SNV	T	C	No	1		Heterozygous	32	53	60.3774	1	14	18	0.4375	34.4375	32	53	20	20	0.23	0.785331	0.884431	No	1	200	RPL31, TBC1D8	protein_coding, protein_coding	RPL31, TBC1D8	ENSG00000071082, ENSG00000204634	RPL31, TBC1D8	ensembl_havana, ensembl_havana	protein_coding, protein_coding	ENST00000409028:c.[346+1938T>C]; ENST00000409038:c.[346+1938T>C]; ENST00000441435:c.[307+1938T>C]; ENST00000376840:c.[3235A>G]; ENST00000409650:c.[346+1938T>C]; ENST00000409318:c.[3280A>G]	ENSP00000366036:p.[Arg1079Gly]; ENSP00000386856:p.[Arg1094Gly]	ENSP00000386856:p.Arg1094Gly	ENST00000409318:c.3280A>G	No	Yes
2	101925026	SNV	T	C	No	1		Homozygous	12	12	100	1	12	0	0	36.9167	12	12	9	10		1	1	No	1	200	RNF149	protein_coding	RNF149	ENSG00000163162	RNF149	ensembl_havana	protein_coding	ENST00000295317:c.[25A>G]; ENST00000424632:c.[25A>G]	ENSP00000295317:p.[Ser9Gly]; ENSP00000399090:p.[Ser9Gly]	ENSP00000295317:p.Ser9Gly	ENST00000295317:c.25A>G	No	Yes
2	105882573	SNV	T	C	No	1		Heterozygous	26	35	74.2857	1	10	16	0.384615	36.8846	26	35	16	15	0	0.991606	0.999291	No	1	200	TGFBRAP1, AC012360.2	protein_coding, protein_coding	TGFBRAP1, AC012360.2	ENSG00000135966, ENSG00000268809	TGFBRAP1, AC012360.2	ensembl_havana, ensembl	protein_coding, protein_coding	ENST00000393359:c.[*1267A>G]; ENST00000595531:c.[13A>G]	ENSP00000471434:p.Ile5Val		ENST00000393359:c.*1267A>G	No	Yes
2	105959592	SNV	G	A	No	1		Heterozygous	27	40	67.5	1	19	8	0.296296	36.8889	27	40	19	19	1.53	0.997408	1	No	1	200	C2orf49	protein_coding	C2orf49	ENSG00000135974	C2orf49	ensembl_havana	protein_coding	ENST00000437250:c.[542G>A]; ENST00000258457:c.[554G>A]; ENST00000410049:c.[428G>A]	ENSP00000400208:p.[Gly181Asp]; ENSP00000258457:p.[Gly185Asp]; ENSP00000386361:p.[Gly143Asp]	ENSP00000258457:p.Gly185Asp	ENST00000258457:c.554G>A	No	Yes
2	110373165	SNV	G	A	No	1		Heterozygous	11	18	61.1111	1	3	8	0.272727	39.0909	11	18	9	9	0	0.959035	0.79507	No	1	200	SOWAHC	protein_coding	SOWAHC	ENSG00000198142	SOWAHC	ensembl_havana	protein_coding	ENST00000356454:c.1099G>A	ENSP00000365830:p.Asp367Asn	ENSP00000365830:p.Asp367Asn	ENST00000356454:c.1099G>A	No	Yes
2	110373468	SNV	A	G	No	1		Heterozygous	7	10	70	1	3	4	0.428571	35.7143	7	10	5	5	0.66	0.563038	0.937636	No	1	200	SOWAHC	protein_coding	SOWAHC	ENSG00000198142	SOWAHC	ensembl_havana	protein_coding	ENST00000356454:c.1402A>G	ENSP00000365830:p.Ile468Val	ENSP00000365830:p.Ile468Val	ENST00000356454:c.1402A>G	No	Yes
2	111417586	SNV	G	T	No	1		Heterozygous	8	23	34.7826	1	8	0	0	19.5	8	23	5	5	3.63	0.372781	0.0593425	No	1	124.249	BUB1	protein_coding	BUB1	ENSG00000169679	BUB1	ensembl_havana	protein_coding	ENST00000302759:c.[1245C>A]; ENST00000409311:c.[1245C>A]; ENST00000535254:c.[1185C>A]	ENSP00000302530:p.[Phe415Leu]; ENSP00000386701:p.[Phe415Leu]; ENSP00000441013:p.[Phe395Leu]	ENSP00000441013:p.Phe395Leu	ENST00000535254:c.1185C>A	No	Yes
2	113309473	SNV	C	T	No	1		Heterozygous	9	14	64.2857	1	5	4	0.444444	36.8889	9	14	6	6	0	0.999139	0.998563	No	1	200	POLR1B	protein_coding	POLR1B	ENSG00000125630	POLR1B	ensembl_havana	protein_coding	ENST00000417433:c.[716C>T]; ENST00000448770:c.[177+9225C>T]; ENST00000541869:c.[998C>T]; ENST00000430293:c.[*238C>T]; ENST00000333990:c.[*754C>T]; ENST00000409894:c.[884C>T]; ENST00000537335:c.[251C>T]; ENST00000263331:c.[884C>T]	ENSP00000405358:p.[Ser239Leu]; ENSP00000444136:p.[Ser333Leu]; ENSP00000387143:p.[Ser295Leu]; ENSP00000437914:p.[Ser84Leu]; ENSP00000263331:p.[Ser295Leu]	ENSP00000263331:p.Ser295Leu	ENST00000263331:c.884C>T	No	Yes
2	113513825	SNV	T	C	No	1		Homozygous	13	13	100	1	6	7	0.461538	37.9231	13	13	8	8		1	1	No	1	200	CKAP2L	protein_coding	CKAP2L	ENSG00000169607	CKAP2L	ensembl_havana	protein_coding	ENST00000435431:c.[479-114A>G]; ENST00000541405:c.[628A>G]; ENST00000302450:c.[1123A>G]	ENSP00000438763:p.[Ile210Val]; ENSP00000305204:p.[Ile375Val]	ENSP00000438763:p.Ile210Val	ENST00000541405:c.628A>G	No	Yes
2	118575215	SNV	C	G	No	1		Homozygous	35	36	97.2222	1	21	14	0.4	38.8286	35	36	17	16		1	1	No	1	200	DDX18	protein_coding	DDX18	ENSG00000088205	DDX18	ensembl_havana	protein_coding	ENST00000263239:c.281C>G	ENSP00000263239:p.Thr94Ser	ENSP00000263239:p.Thr94Ser	ENST00000263239:c.281C>G	No	Yes
2	120078778	SNV	T	C	No	1		Heterozygous	13	33	39.3939	1	6	7	0.461538	36.7692	13	33	9	9	0	0.460251	0.726675	No	1	200	C2orf76	protein_coding	C2orf76	ENSG00000186132	C2orf76	ensembl_havana	protein_coding	ENST00000409523:c.[136A>G]; ENST00000409466:c.[136A>G]; ENST00000414534:c.[223A>G]; ENST00000409877:c.[136A>G]; ENST00000334816:c.[136A>G]	ENSP00000386714:p.[Ile46Val]; ENSP00000386302:p.[Ile46Val]; ENSP00000388482:p.[Ile75Val]; ENSP00000387234:p.[Ile46Val]; ENSP00000335041:p.[Ile46Val]	ENSP00000386302:p.Ile46Val	ENST00000409466:c.136A>G	No	Yes
2	120438523	SNV	A	G	No	1		Heterozygous	11	13	84.6154	1	5	6	0.454545	38.5455	11	13	8	8	0	0.969081	1	No	1	200	TMEM177	protein_coding	TMEM177	ENSG00000144120	TMEM177	ensembl_havana	protein_coding	ENST00000424086:c.[94A>G]; ENST00000409951:c.[94A>G]; ENST00000401466:c.[94A>G]; ENST00000445518:c.[94A>G]; ENST00000272521:c.[94A>G]	ENSP00000402661:p.[Ile32Val]; ENSP00000386430:p.[Ile32Val]; ENSP00000385966:p.[Ile32Val]; ENSP00000405898:p.[Ile32Val]; ENSP00000272521:p.[Ile32Val]	ENSP00000402661:p.Ile32Val	ENST00000424086:c.94A>G	No	Yes
2	120439211	SNV	G	A	No	1		Heterozygous	6	24	25	1	3	3	0.5	37	6	24	6	6	0	0.53025	0.978437	No	1	149.546	TMEM177	protein_coding	TMEM177	ENSG00000144120	TMEM177	ensembl_havana	protein_coding	ENST00000272521:c.[782G>A]; ENST00000409951:c.[270+512G>A]; ENST00000424086:c.[782G>A]; ENST00000401466:c.[782G>A]	ENSP00000272521:p.[Arg261His]; ENSP00000402661:p.[Arg261His]; ENSP00000385966:p.[Arg261His]	ENSP00000402661:p.Arg261His	ENST00000424086:c.782G>A	No	Yes
2	120439230	SNV	C	G	No	1		Heterozygous	12	20	60	1	8	4	0.333333	38.75	12	20	9	9	0	0.830053	0.926255	No	1	200	TMEM177	protein_coding	TMEM177	ENSG00000144120	TMEM177	ensembl_havana	protein_coding	ENST00000409951:c.[270+531C>G]; ENST00000401466:c.[801C>G]; ENST00000272521:c.[801C>G]; ENST00000424086:c.[801C>G]	ENSP00000385966:p.[Asp267Glu]; ENSP00000272521:p.[Asp267Glu]; ENSP00000402661:p.[Asp267Glu]	ENSP00000402661:p.Asp267Glu	ENST00000424086:c.801C>G	No	Yes
2	131100734	SNV	G	A	No	1		Heterozygous	52	78	66.6667	1	39	13	0.25	37.1923	52	78	25	25	0	0.894125	0.711416	No	1	200	IMP4	protein_coding	IMP4	ENSG00000136718	IMP4	ensembl_havana	protein_coding	ENST00000259239:c.[79G>A]; ENST00000409935:c.[79G>A]; ENST00000409649:c.[-177G>A]; ENST00000456713:c.[79G>A]; ENST00000428740:c.[-100G>A]	ENSP00000259239:p.[Glu27Lys]; ENSP00000386411:p.[Glu27Lys]; ENSP00000416756:p.[Glu27Lys]	ENSP00000259239:p.Glu27Lys	ENST00000259239:c.79G>A	No	Yes
2	143798189	SNV	A	G	No	1		Heterozygous	106	352	30.1136	1	58	48	0.45283	37.6321	106	352	34	32	1.99	0.998539	0.978083	No	1	200	KYNU	protein_coding	KYNU	ENSG00000115919	KYNU	ensembl_havana	protein_coding	ENST00000264170:c.[1234A>G]; ENST00000409512:c.[1234A>G]	ENSP00000264170:p.[Lys412Glu]; ENSP00000386731:p.[Lys412Glu]	ENSP00000264170:p.Lys412Glu	ENST00000264170:c.1234A>G	No	Yes
2	150432289^150432290	Insertion	-	T	No	1		Heterozygous	24	332	7.22892	1	5	19	0.208333	38.75	24	332	12	10	0	0.000108474	0.115249	Yes	6	200	MMADHC	protein_coding	MMADHC	ENSG00000168288	MMADHC	ensembl_havana	protein_coding	ENST00000428879:c.[544_545insA]; ENST00000422782:c.[544_545insA]; ENST00000303319:c.[544_545insA]	ENSP00000389060:p.[Thr182fs]; ENSP00000408331:p.[Thr182fs]; ENSP00000301920:p.[Thr182fs]	ENSP00000389060:p.Thr182fs	ENST00000428879:c.544_545insA	No	Yes
2	150438772	SNV	C	G	No	1		Heterozygous	59	161	36.646	1	30	29	0.491525	38.7966	59	161	32	32	0	0.961292	0.953419	No	1	200	MMADHC	protein_coding	MMADHC	ENSG00000168288	MMADHC	ensembl_havana	protein_coding	ENST00000422782:c.[23G>C]; ENST00000428879:c.[23G>C]; ENST00000303319:c.[23G>C]	ENSP00000408331:p.[Arg8Thr]; ENSP00000389060:p.[Arg8Thr]; ENSP00000301920:p.[Arg8Thr]	ENSP00000389060:p.Arg8Thr	ENST00000428879:c.23G>C	No	Yes
2	152322095	SNV	A	T	No	1		Homozygous	17	17	100	1	12	5	0.294118	36.4118	17	17	12	10		1	1	No	1	200	RIF1	protein_coding	RIF1	ENSG00000080345	RIF1	ensembl_havana	protein_coding	ENST00000453091:c.[6061A>T]; ENST00000428287:c.[6061A>T]; ENST00000444746:c.[6061A>T]; ENST00000454583:c.[880A>T]; ENST00000430328:c.[6061A>T]; ENST00000243326:c.[6061A>T]	ENSP00000414615:p.[Asn2021Tyr]; ENSP00000415691:p.[Asn2021Tyr]; ENSP00000390181:p.[Asn2021Tyr]; ENSP00000404882:p.[Asn294Tyr]; ENSP00000416123:p.[Asn2021Tyr]; ENSP00000243326:p.[Asn2021Tyr]	ENSP00000243326:p.Asn2021Tyr	ENST00000243326:c.6061A>T	No	Yes
2	152331418	SNV	C	G	No	1		Homozygous	32	32	100	1	18	14	0.4375	38.8438	32	32	18	19		1	1	No	1	200	RIF1	protein_coding	RIF1	ENSG00000080345	RIF1	ensembl_havana	protein_coding	ENST00000428287:c.[7174C>G]; ENST00000243326:c.[7252C>G]; ENST00000430328:c.[7174C>G]; ENST00000444746:c.[7252C>G]; ENST00000453091:c.[7174C>G]; ENST00000454583:c.[2071C>G]	ENSP00000415691:p.[Leu2392Val]; ENSP00000243326:p.[Leu2418Val]; ENSP00000416123:p.[Leu2392Val]; ENSP00000390181:p.[Leu2418Val]; ENSP00000414615:p.[Leu2392Val]; ENSP00000404882:p.[Leu691Val]	ENSP00000243326:p.Leu2418Val	ENST00000243326:c.7252C>G	No	Yes
2	157406249	SNV	G	A	No	1		Heterozygous	6	8	75	1	1	5	0.166667	37	6	8	3	3	0.91	0.909461	0.990993	No	1	200	GPD2	protein_coding	GPD2	ENSG00000115159	GPD2	ensembl_havana	protein_coding	ENST00000409674:c.[791G>A]; ENST00000409861:c.[791G>A]; ENST00000310454:c.[791G>A]; ENST00000409125:c.[110G>A]; ENST00000438166:c.[791G>A]; ENST00000540309:c.[791G>A]	ENSP00000386425:p.[Arg264His]; ENSP00000386626:p.[Arg264His]; ENSP00000308610:p.[Arg264His]; ENSP00000386484:p.[Arg37His]; ENSP00000409708:p.[Arg264His]; ENSP00000440892:p.[Arg264His]	ENSP00000308610:p.Arg264His	ENST00000310454:c.791G>A	No	Yes
2	159663616	SNV	G	A	No	1		Heterozygous	7	9	77.7778	1	3	4	0.428571	36.8571	7	9	5	5	0	0.970123	0.954103	No	1	200	DAPL1	protein_coding	DAPL1	ENSG00000163331	DAPL1	ensembl_havana	protein_coding	ENST00000409042:c.[196G>A]; ENST00000343761:c.[121G>A]; ENST00000309950:c.[196G>A]	ENSP00000386422:p.[Ala66Thr]; ENSP00000385306:p.[Ala41Thr]; ENSP00000309538:p.[Ala66Thr]	ENSP00000385306:p.Ala41Thr	ENST00000343761:c.121G>A	No	Yes
2	160112881	SNV	G	T	No	1		Homozygous	19	19	100	1	7	12	0.368421	37.3158	19	19	12	12		1	1	No	1	200	WDSUB1	protein_coding	WDSUB1	ENSG00000196151	WDSUB1	ensembl_havana	protein_coding	ENST00000358147:c.[682C>A]; ENST00000409990:c.[958C>A]; ENST00000392796:c.[958C>A]; ENST00000359774:c.[958C>A]; ENST00000409124:c.[958C>A]	ENSP00000350866:p.[Arg228Ser]; ENSP00000387078:p.[Arg320Ser]; ENSP00000376545:p.[Arg320Ser]; ENSP00000352820:p.[Arg320Ser]; ENSP00000386891:p.[Arg320Ser]	ENSP00000387078:p.Arg320Ser	ENST00000409990:c.958C>A	No	Yes
2	160136337	SNV	G	A	No	1		Homozygous	19	19	100	1	11	8	0.421053	36.5263	19	19	12	12		1	1	No	1	200	WDSUB1	protein_coding	WDSUB1	ENSG00000196151	WDSUB1	ensembl_havana	protein_coding	ENST00000359774:c.[518C>T]; ENST00000392796:c.[518C>T]; ENST00000409124:c.[518C>T]; ENST00000409990:c.[518C>T]; ENST00000358147:c.[518C>T]	ENSP00000352820:p.[Pro173Leu]; ENSP00000376545:p.[Pro173Leu]; ENSP00000386891:p.[Pro173Leu]; ENSP00000387078:p.[Pro173Leu]; ENSP00000350866:p.[Pro173Leu]	ENSP00000387078:p.Pro173Leu	ENST00000409990:c.518C>T	No	Yes
2	162087835	SNV	G	A	No	1		Heterozygous	21	71	29.5775	1	12	9	0.428571	37.7143	21	71	16	16	0	0.460825	0.998968	No	1	200	TANK, AC009299.2	protein_coding, antisense	TANK, AC009299.2	ENSG00000136560, ENSG00000235724	TANK, AC009299.2	ensembl_havana, havana	protein_coding, antisense	ENST00000392749:c.[874G>A]; ENST00000406287:c.[695-4018G>A]; ENST00000405852:c.[874G>A]; ENST00000439442:c.[139G>A]; ENST00000259075:c.[874G>A]; ENST00000402568:c.[698-4018G>A]; ENST00000437623:c.[547G>A]	ENSP00000376505:p.[Gly292Arg]; ENSP00000385487:p.[Gly292Arg]; ENSP00000387439:p.[Gly47Arg]; ENSP00000259075:p.[Gly292Arg]; ENSP00000412556:p.[Gly183Arg]	ENSP00000376505:p.Gly292Arg	ENST00000392749:c.874G>A	No	Yes
2	163124051	SNV	C	T	No	1		Heterozygous	16	28	57.1429	1	7	9	0.4375	37.625	16	28	10	9	0.87	0.922475	0.970474	No	1	200	IFIH1	protein_coding	IFIH1	ENSG00000115267	IFIH1	havana	protein_coding	ENST00000263642:c.2836G>A	ENSP00000263642:p.Ala946Thr	ENSP00000263642:p.Ala946Thr	ENST00000263642:c.2836G>A	No	Yes
2	163128824	SNV	T	C	No	1		Homozygous	30	30	100	1	22	8	0.266667	37.9333	30	30	14	12		1	1	No	1	200	IFIH1	protein_coding	IFIH1	ENSG00000115267	IFIH1	havana	protein_coding	ENST00000263642:c.2528A>G	ENSP00000263642:p.His843Arg	ENSP00000263642:p.His843Arg	ENST00000263642:c.2528A>G	No	Yes
2	170403030	SNV	T	C	No	1		Heterozygous	10	13	76.9231	1	6	4	0.4	39.8	10	13	7	7	0	0.913379	0.969906	No	1	200	FASTKD1	protein_coding	FASTKD1	ENSG00000138399	FASTKD1	ensembl_havana	protein_coding	ENST00000453929:c.[1399A>G]; ENST00000453153:c.[1399A>G]	ENSP00000403229:p.[Met467Val]; ENSP00000400513:p.[Met467Val]	ENSP00000400513:p.Met467Val	ENST00000453153:c.1399A>G	No	Yes
2	170493103	SNV	T	A	No	1		Heterozygous	33	91	36.2637	1	14	19	0.424242	37.7576	33	91	16	17	0	0.491367	0.673079	No	1	200	PPIG	protein_coding	PPIG	ENSG00000138398	PPIG	ensembl_havana	protein_coding	ENST00000260970:c.[1335T>A]; ENST00000409714:c.[1290T>A]; ENST00000448752:c.[1335T>A]; ENST00000433207:c.[1314T>A]	ENSP00000260970:p.[Asp445Glu]; ENSP00000386245:p.[Asp430Glu]; ENSP00000407083:p.[Asp445Glu]; ENSP00000408683:p.[Asp438Glu]	ENSP00000260970:p.Asp445Glu	ENST00000260970:c.1335T>A	No	Yes
2	172180771	SNV	A	G	No	1		Homozygous	12	12	100	1	6	6	0.5	39.5	12	12	10	10		1	1	No	1	200	METTL8	protein_coding	METTL8	ENSG00000123600	METTL8	havana	protein_coding	ENST00000447486:c.[*152T>C]; ENST00000392604:c.[*152T>C]; ENST00000438609:c.[640T>C]; ENST00000375258:c.[1135T>C]	ENSP00000407180:p.[*214Arg]; ENSP00000364407:p.[*379Arg]	ENSP00000364407:p.*379Arg	ENST00000375258:c.1135T>C	No	Yes
2	173339808	SNV	G	A	No	1		Homozygous	10	10	100	1	3	7	0.3	39	10	10	8	8		1	1	No	1	200	ITGA6	protein_coding	ITGA6	ENSG00000091409	ITGA6	ensembl_havana	protein_coding	ENST00000442250:c.[1255G>A]; ENST00000409532:c.[781G>A]; ENST00000343713:c.[1123G>A]; ENST00000458358:c.[1123G>A]; ENST00000264106:c.[1255G>A]; ENST00000409080:c.[1138G>A]; ENST00000375221:c.[1255G>A]; ENST00000264107:c.[1138G>A]	ENSP00000406694:p.[Ala419Thr]; ENSP00000386614:p.[Ala261Thr]; ENSP00000341078:p.[Ala375Thr]; ENSP00000394169:p.[Ala375Thr]; ENSP00000264106:p.[Ala419Thr]; ENSP00000386896:p.[Ala380Thr]; ENSP00000364369:p.[Ala419Thr]; ENSP00000264107:p.[Ala380Thr]	ENSP00000364369:p.Ala419Thr	ENST00000375221:c.1255G>A	No	Yes
2	174128513	SNV	C	T	No	1		Heterozygous	6	8	75	1	2	4	0.333333	40.3333	6	8	5	5	0	0.962447	0.999702	No	1	200	MLTK, MLK7-AS1	protein_coding, antisense	MLTK, MLK7-AS1	ENSG00000091436, ENSG00000238133	MLTK, MLK7-AS1	ensembl_havana, havana	protein_coding, antisense	ENST00000375213:c.[1592C>T]; ENST00000409176:c.[1592C>T]	ENSP00000364361:p.[Ser531Leu]; ENSP00000387259:p.[Ser531Leu]	ENSP00000364361:p.Ser531Leu	ENST00000375213:c.1592C>T	No	Yes
2	175213645	SNV	G	C	No	1		Heterozygous	6	33	18.1818	1	4	2	0.333333	36.5	6	33	4	4	0	0.644382	0.878981	No	1	200	CIR1	protein_coding	CIR1	ENSG00000138433	CIR1	ensembl_havana	protein_coding	ENST00000362053:c.[*352C>G]; ENST00000342016:c.[933C>G]	ENSP00000339723:p.Asp311Glu	ENSP00000339723:p.Asp311Glu	ENST00000342016:c.933C>G	No	Yes
2	180810264	SNV	A	T	No	1		Homozygous	34	34	100	1	13	21	0.382353	39.0294	34	34	19	18		1	1	No	1	200	CWC22	protein_coding	CWC22	ENSG00000163510	CWC22	ensembl_havana	protein_coding	ENST00000295749:c.[2319T>A]; ENST00000410053:c.[2319T>A]	ENSP00000295749:p.[Ser773Arg]; ENSP00000387006:p.[Ser773Arg]	ENSP00000387006:p.Ser773Arg	ENST00000410053:c.2319T>A	No	Yes
2	182765629	SNV	C	A	No	1		Heterozygous	11	27	40.7407	1	0	11	0	29.0909	11	27	6	2	3.52	0.00901793	0.0145904	No	1	200	SSFA2	protein_coding	SSFA2	ENSG00000138434	SSFA2	ensembl_havana	protein_coding	ENST00000440623:c.[*247C>A]; ENST00000416081:c.[*247C>A]; ENST00000409001:c.[710C>A]; ENST00000320370:c.[710C>A]; ENST00000454579:c.[*247C>A]; ENST00000431877:c.[710C>A]; ENST00000428267:c.[251C>A]	ENSP00000387319:p.[Thr237Lys]; ENSP00000314669:p.[Thr237Lys]; ENSP00000388731:p.[Thr237Lys]; ENSP00000409867:p.[Thr84Lys]		ENST00000440623:c.*247C>A	No	Yes
2	182780817	SNV	C	T	No	1		Heterozygous	12	36	33.3333	1	7	5	0.416667	32.9167	12	36	9	9	0	0.780404	1	No	1	200	SSFA2	protein_coding	SSFA2	ENSG00000138434	SSFA2	ensembl_havana	protein_coding	ENST00000454579:c.[*1987C>T]; ENST00000320370:c.[2450C>T]; ENST00000416081:c.[*1987C>T]; ENST00000440623:c.[*1987C>T]; ENST00000409001:c.[2450C>T]; ENST00000428267:c.[1991C>T]; ENST00000409136:c.[977C>T]; ENST00000431877:c.[2450C>T]	ENSP00000314669:p.[Ala817Val]; ENSP00000387319:p.[Ala817Val]; ENSP00000409867:p.[Ala664Val]; ENSP00000386916:p.[Ala326Val]; ENSP00000388731:p.[Ala817Val]		ENST00000440623:c.*1987C>T	No	Yes
2	183622547	SNV	T	G	No	1		Heterozygous	23	59	38.9831	1	11	12	0.478261	38.2174	23	59	14	14	0	0.562722	0.989662	No	1	200	DNAJC10	protein_coding	DNAJC10	ENSG00000077232	DNAJC10	ensembl_havana	protein_coding	ENST00000418559:c.[*1003T>G]; ENST00000264065:c.[1938T>G]	ENSP00000264065:p.His646Gln	ENSP00000264065:p.His646Gln	ENST00000264065:c.1938T>G	No	Yes
2	187532417	SNV	G	A	No	1		Homozygous	19	19	100	1	15	4	0.210526	37.6842	19	19	11	10		1	1	No	1	200	ITGAV, AC017101.10	protein_coding, antisense	ITGAV, AC017101.10	ENSG00000138448, ENSG00000227227	ITGAV, AC017101.10	ensembl_havana, havana	protein_coding, antisense	ENST00000261023:c.[2347G>A]; ENST00000433736:c.[2209G>A]; ENST00000374907:c.[2239G>A]	ENSP00000261023:p.[Val783Ile]; ENSP00000404291:p.[Val737Ile]; ENSP00000364042:p.[Val747Ile]	ENSP00000261023:p.Val783Ile	ENST00000261023:c.2347G>A	No	Yes
2	190531426	SNV	G	A	No	1		Homozygous	23	23	100	1	9	14	0.391304	39.1304	23	23	16	16		1	1	No	1	200	ASNSD1	protein_coding	ASNSD1	ENSG00000138381	ASNSD1	ensembl_havana	protein_coding	ENST00000420250:c.[568G>A]; ENST00000260952:c.[568G>A]; ENST00000606910:c.[221-496G>A]; ENST00000607062:c.[21+547G>A]	ENSP00000406790:p.[Gly190Arg]; ENSP00000260952:p.[Gly190Arg]	ENSP00000260952:p.Gly190Arg	ENST00000260952:c.568G>A	No	Yes
2	191161622	SNV	T	C	No	1		Homozygous	42	43	97.6744	1	19	23	0.452381	38.0238	42	43	17	16		1	1	No	1	200	HIBCH	protein_coding	HIBCH	ENSG00000198130	HIBCH	ensembl_havana	protein_coding	ENST00000392332:c.[136A>G]; ENST00000359678:c.[136A>G]; ENST00000409934:c.[298A>G]	ENSP00000376144:p.[Thr46Ala]; ENSP00000352706:p.[Thr46Ala]; ENSP00000387247:p.[Thr100Ala]	ENSP00000376144:p.Thr46Ala	ENST00000392332:c.136A>G	No	Yes
2	191184475	SNV	A	G	No	1		Homozygous	8	8	100	1	2	6	0.25	39.5	8	8	8	8		1	1	No	1	200	HIBCH	protein_coding	HIBCH	ENSG00000198130	HIBCH	ensembl_havana	protein_coding	ENST00000409934:c.[198-8953T>C]; ENST00000359678:c.[2T>C]; ENST00000392332:c.[2T>C]	ENSP00000352706:p.[Met1?]; ENSP00000376144:p.[Met1?]	ENSP00000376144:p.Met1?	ENST00000392332:c.2T>C	No	Yes
2	191235610	SNV	A	G	No	1		Heterozygous	6	12	50	1	4	2	0.333333	33	6	12	5	5	0.53	0.793329	1	No	1	141.484	INPP1	protein_coding	INPP1	ENSG00000151689	INPP1	ensembl_havana	protein_coding	ENST00000541441:c.[682A>G]; ENST00000392329:c.[682A>G]; ENST00000322522:c.[682A>G]	ENSP00000440650:p.[Thr228Ala]; ENSP00000376142:p.[Thr228Ala]; ENSP00000325423:p.[Thr228Ala]	ENSP00000376142:p.Thr228Ala	ENST00000392329:c.682A>G	No	Yes
2	191301368	SNV	A	G	No	1		Homozygous	9	9	100	1	6	3	0.333333	39	9	9	8	8		1	1	No	1	200	MFSD6	protein_coding	MFSD6	ENSG00000151690	MFSD6	ensembl_havana	protein_coding	ENST00000392328:c.[613A>G]; ENST00000281416:c.[613A>G]	ENSP00000376141:p.[Arg205Gly]; ENSP00000281416:p.[Arg205Gly]	ENSP00000376141:p.Arg205Gly	ENST00000392328:c.613A>G	No	Yes
2	198266174^198266175	Insertion	-	A	No	1		Heterozygous	7	172	4.06977	1	4	3	0.428571	40.8571	7	172	7	7	0	0.289354	0.838778	Yes	6	200	SF3B1	protein_coding	SF3B1	ENSG00000115524	SF3B1	ensembl_havana	protein_coding	ENST00000335508:c.2445_2446insT	ENSP00000335321:p.Lys816fs	ENSP00000335321:p.Lys816fs	ENST00000335508:c.2445_2446insT	No	Yes
2	198353043^198353044	Insertion	-	T	No	1		Heterozygous	9	559	1.61002	1	2	7	0.222222	39.3333	9	559	5	3	0	0.0541162	0.0900079	Yes	6	200	HSPD1	protein_coding	HSPD1	ENSG00000144381	HSPD1	ensembl_havana	protein_coding	ENST00000388968:c.[1387_1388insA]; ENST00000345042:c.[1387_1388insA]	ENSP00000373620:p.[Ile463fs]; ENSP00000340019:p.[Ile463fs]	ENSP00000373620:p.Ile463fs	ENST00000388968:c.1387_1388insA	No	Yes
2	201436097	SNV	A	C	No	1		Heterozygous	7	13	53.8462	1	1	6	0.142857	39.4286	7	13	5	5	0	0.472135	0.645212	No	1	200	SGOL2	protein_coding	SGOL2	ENSG00000163535	SGOL2	ensembl_havana	protein_coding	ENST00000357799:c.1028A>C	ENSP00000350447:p.Glu343Ala	ENSP00000350447:p.Glu343Ala	ENST00000357799:c.1028A>C	No	Yes
2	201436555	SNV	A	G	No	1		Heterozygous	12	16	75	1	4	8	0.333333	36.6667	12	16	8	8	0	0.890328	0.999405	No	1	200	SGOL2	protein_coding	SGOL2	ENSG00000163535	SGOL2	ensembl_havana	protein_coding	ENST00000357799:c.1486A>G	ENSP00000350447:p.Ile496Val	ENSP00000350447:p.Ile496Val	ENST00000357799:c.1486A>G	No	Yes
2	201437048	SNV	A	G	No	1		Heterozygous	7	14	50	1	3	4	0.428571	38.8571	7	14	6	6	0	0.578105	0.992791	No	1	200	SGOL2	protein_coding	SGOL2	ENSG00000163535	SGOL2	ensembl_havana	protein_coding	ENST00000357799:c.1979A>G	ENSP00000350447:p.Asn660Ser	ENSP00000350447:p.Asn660Ser	ENST00000357799:c.1979A>G	No	Yes
2	201721630	SNV	G	A	No	1		Heterozygous	14	23	60.8696	1	8	6	0.428571	35.7857	14	23	11	11	0.36	0.983764	0.999855	No	1	200	CLK1	protein_coding	CLK1	ENSG00000013441	CLK1	ensembl_havana	protein_coding	ENST00000432425:c.[*409C>T]; ENST00000321356:c.[911C>T]; ENST00000434813:c.[1037C>T]; ENST00000409403:c.[911C>T]; ENST00000409769:c.[380C>T]	ENSP00000326830:p.[Ala304Val]; ENSP00000394734:p.[Ala346Val]; ENSP00000386875:p.[Ala304Val]; ENSP00000386358:p.[Ala127Val]	ENSP00000394734:p.Ala346Val	ENST00000434813:c.1037C>T	No	Yes
2	201736166	SNV	A	C	No	1		Heterozygous	22	59	37.2881	1	13	9	0.409091	38.1818	22	59	14	14	0	0.995606	0.783876	No	1	200	PPIL3	protein_coding	PPIL3	ENSG00000240344	PPIL3	ensembl_havana	protein_coding	ENST00000392283:c.[438T>G]; ENST00000415562:c.[*223T>G]; ENST00000409449:c.[450T>G]; ENST00000409264:c.[495T>G]; ENST00000409361:c.[426T>G]; ENST00000286175:c.[450T>G]	ENSP00000376107:p.[Asp146Glu]; ENSP00000387012:p.[Asp150Glu]; ENSP00000386893:p.[Asp165Glu]; ENSP00000386235:p.[Asp142Glu]; ENSP00000286175:p.[Asp150Glu]	ENSP00000286175:p.Asp150Glu	ENST00000286175:c.450T>G	No	Yes
2	201768238	SNV	C	T	No	1		Homozygous	53	53	100	1	34	19	0.358491	39.3019	53	53	25	25		1	1	No	1	200	NIF3L1	protein_coding	NIF3L1	ENSG00000196290	NIF3L1	ensembl_havana	protein_coding	ENST00000409588:c.[832C>T]; ENST00000416651:c.[971C>T]; ENST00000409020:c.[971C>T]; ENST00000436412:c.[224-155C>T]; ENST00000359683:c.[890C>T]; ENST00000409357:c.[971C>T]	ENSP00000387021:p.[Leu278Phe]; ENSP00000400787:p.[Thr324Ile]; ENSP00000386394:p.[Thr324Ile]; ENSP00000352711:p.[Thr297Ile]; ENSP00000387315:p.[Thr324Ile]	ENSP00000386394:p.Thr324Ile	ENST00000409020:c.971C>T	No	Yes
2	202264156	SNV	C	T	No	1		Heterozygous	6	8	75	1	4	2	0.333333	39	6	8	6	6	0.48	0.859392	0.906958	No	1	200	TRAK2, STRADB	protein_coding, protein_coding	TRAK2, STRADB	ENSG00000115993, ENSG00000082146	TRAK2, STRADB	ensembl_havana, ensembl_havana	protein_coding, protein_coding	ENST00000332624:c.[424G>A]; ENST00000430254:c.[424G>A]; ENST00000458269:c.[28+11358C>T]	ENSP00000328875:p.[Val142Ile]; ENSP00000409333:p.[Val142Ile]	ENSP00000328875:p.Val142Ile	ENST00000332624:c.424G>A	No	Yes
2	203155114	SNV	C	G	No	1		Heterozygous	11	94	11.7021	1	11	0	0	18.5455	11	94	6	5	4.93	1.09783e-05	0.0304645	No	1	118.882	NOP58	protein_coding	NOP58	ENSG00000055044	NOP58	ensembl_havana	protein_coding	ENST00000433543:c.[178C>G]; ENST00000264279:c.[568C>G]	ENSP00000388126:p.[His60Asp]; ENSP00000264279:p.[His190Asp]	ENSP00000264279:p.His190Asp	ENST00000264279:c.568C>G	No	Yes
2	204154552	SNV	C	T	No	1		Homozygous	15	15	100	1	9	6	0.4	37.0667	15	15	10	9		1	1	No	1	200	CYP20A1	protein_coding	CYP20A1	ENSG00000119004	CYP20A1	ensembl_havana	protein_coding	ENST00000431118:c.[*734C>T]; ENST00000449301:c.[*330C>T]; ENST00000356079:c.[1036C>T]; ENST00000429815:c.[1060C>T]	ENSP00000348380:p.[Leu346Phe]; ENSP00000407860:p.[Leu354Phe]		ENST00000431118:c.*734C>T	No	Yes
2	207026824^207026825	Insertion	-	A	No	1		Heterozygous	18	609	2.95567	1	11	7	0.388889	39.5	18	609	14	13	0	0.492334	1	Yes	4	200	EEF1B2	protein_coding	EEF1B2	ENSG00000114942	EEF1B2	ensembl_havana	protein_coding	ENST00000455150:c.[*176_*177insA]; ENST00000392221:c.[393_394insA]; ENST00000236957:c.[393_394insA]; ENST00000429769:c.[*432_*433insA]; ENST00000392222:c.[393_394insA]	ENSP00000376055:p.[Pro134fs]; ENSP00000236957:p.[Pro134fs]; ENSP00000376056:p.[Pro134fs]	ENSP00000376056:p.Pro134fs	ENST00000392222:c.393_394insA	No	Yes
2	209108317	SNV	C	T	No	1		Heterozygous	78	103	75.7282	1	31	47	0.397436	36.4359	78	103	32	31	0	0.999596	1	No	1	200	IDH1	protein_coding	IDH1	ENSG00000138413	IDH1	ensembl_havana	protein_coding	ENST00000415913:c.[532G>A]; ENST00000345146:c.[532G>A]; ENST00000446179:c.[532G>A]	ENSP00000390265:p.[Val178Ile]; ENSP00000260985:p.[Val178Ile]; ENSP00000410513:p.[Val178Ile]	ENSP00000390265:p.Val178Ile	ENST00000415913:c.532G>A	No	Yes
2	215632255..215632256	MNV	CA	TG	No	2		Homozygous	8	8	100	1	5	3	0.375	37.5	8	8	7	7		1	1	No	1	200	BARD1	protein_coding	BARD1	ENSG00000138376	BARD1	ensembl_havana	protein_coding	ENST00000455743:c.[*1138_*1139delTGinsCA]; ENST00000449967:c.[1086_1087delTGinsCA]; ENST00000260947:c.[1518_1519delTGinsCA]; ENST00000421162:c.[216-14977_216-14976delTGinsCA]	ENSP00000406752:p.[Val363Met]; ENSP00000260947:p.[Val507Met]	ENSP00000260947:p.Val507Met	ENST00000260947:c.1518_1519delTGinsCA	No	Yes
2	216184445	SNV	A	G	No	1		Heterozygous	12	104	11.5385	1	4	8	0.333333	39	12	104	7	7	0	0.151913	0.998128	No	1	200	ATIC	protein_coding	ATIC	ENSG00000138363	ATIC	ensembl_havana	protein_coding	ENST00000444305:c.[223+1489A>G]; ENST00000413174:c.[104A>G]; ENST00000435675:c.[278A>G]; ENST00000443953:c.[*378A>G]; ENST00000540518:c.[104A>G]; ENST00000427397:c.[*331A>G]; ENST00000236959:c.[281A>G]	ENSP00000402393:p.[Asn35Ser]; ENSP00000415935:p.[Asn93Ser]; ENSP00000440523:p.[Asn35Ser]; ENSP00000236959:p.[Asn94Ser]	ENSP00000415935:p.Asn93Ser	ENST00000435675:c.278A>G	No	Yes
2	216190020	SNV	C	G	No	1		Heterozygous	79	91	86.8132	1	33	46	0.417722	38.2658	79	91	34	34	0.17	0.999499	1	No	1	200	ATIC	protein_coding	ATIC	ENSG00000138363	ATIC	ensembl_havana	protein_coding	ENST00000443953:c.[*444C>G]; ENST00000236959:c.[347C>G]; ENST00000413174:c.[170C>G]; ENST00000540518:c.[170C>G]; ENST00000435675:c.[344C>G]; ENST00000444305:c.[*25C>G]; ENST00000427397:c.[*397C>G]	ENSP00000236959:p.[Thr116Ser]; ENSP00000402393:p.[Thr57Ser]; ENSP00000440523:p.[Thr57Ser]; ENSP00000415935:p.[Thr115Ser]	ENSP00000415935:p.Thr115Ser	ENST00000435675:c.344C>G	No	Yes
2	216878008	SNV	C	G	No	1		Homozygous	8	8	100	1	4	4	0.5	36	8	8	7	7		1	1	No	1	200	MREG, PECR	protein_coding, protein_coding	MREG, PECR	ENSG00000118242, ENSG00000115425	MREG, PECR	ensembl_havana, ensembl_havana	protein_coding, protein_coding	ENST00000263268:c.[43G>C]; ENST00000420348:c.[-67-16820G>C]; ENST00000424992:c.[-67-16820G>C]; ENST00000442122:c.[*441-16820G>C]; ENST00000439791:c.[-67-16820G>C]	ENSP00000263268:p.Gly15Arg	ENSP00000263268:p.Gly15Arg	ENST00000263268:c.43G>C	No	Yes
2	217012935	SNV	C	T	No	1		Heterozygous	205	327	62.6911	1	118	87	0.42439	38.5024	205	327	40	38	0	2.00635e-07	0.745879	No	1	200	XRCC5	protein_coding	XRCC5	ENSG00000079246	XRCC5	ensembl_havana	protein_coding	ENST00000392132:c.[1606C>T]; ENST00000392133:c.[1606C>T]	ENSP00000375977:p.[Leu536Phe]; ENSP00000375978:p.[Leu536Phe]	ENSP00000375978:p.Leu536Phe	ENST00000392133:c.1606C>T	No	Yes
2	219114621^219114622	Insertion	-	A	No	1		Heterozygous	6	376	1.59574	1	2	4	0.333333	39.8333	6	376	6	6	0	0.487225	0.857583	Yes	6	200	ARPC2	protein_coding	ARPC2	ENSG00000163466	ARPC2	ensembl_havana	protein_coding	ENST00000315717:c.[855_856insA]; ENST00000295685:c.[855_856insA]; ENST00000456575:c.[300_301insA]	ENSP00000327137:p.[Glu288fs]; ENSP00000295685:p.[Glu288fs]; ENSP00000411612:p.[Glu103fs]	ENSP00000295685:p.Glu288fs	ENST00000295685:c.855_856insA	No	Yes
2	219530933	SNV	T	C	No	1		Heterozygous	6	25	24	1	0	6	0	37.1667	6	25	3	3	1.33	0.595669	0.24097	No	1	120.642	RNF25	protein_coding	RNF25	ENSG00000163481	RNF25	ensembl_havana	protein_coding	ENST00000423170:c.[335A>G]; ENST00000295704:c.[378A>G]	ENSP00000403582:p.[Gln112Arg]		ENST00000295704:c.378A>G	No	Yes
2	220037393	SNV	A	G	No	1		Homozygous	84	84	100	1	30	54	0.357143	37.3095	84	84	30	30		1	1	No	1	200	CNPPD1	protein_coding	CNPPD1	ENSG00000115649	CNPPD1	ensembl_havana	protein_coding	ENST00000409789:c.[1148T>C]; ENST00000360507:c.[1148T>C]	ENSP00000386277:p.[Leu383Pro]; ENSP00000353698:p.[Leu383Pro]	ENSP00000386277:p.Leu383Pro	ENST00000409789:c.1148T>C	No	Yes
2	220037756	SNV	A	G	No	1		Heterozygous	7	83	8.43373	1	1	6	0.142857	38.4286	7	83	5	5	0	0.468945	0.60803	No	1	200	CNPPD1	protein_coding	CNPPD1	ENSG00000115649	CNPPD1	ensembl_havana	protein_coding	ENST00000453038:c.[785T>C]; ENST00000409789:c.[785T>C]; ENST00000360507:c.[785T>C]	ENSP00000410109:p.[Ile262Thr]; ENSP00000386277:p.[Ile262Thr]; ENSP00000353698:p.[Ile262Thr]	ENSP00000386277:p.Ile262Thr	ENST00000409789:c.785T>C	No	Yes
2	220250147	SNV	A	G	No	1		Homozygous	87	87	100	1	70	17	0.195402	37.069	87	87	28	26		1	1	No	1	200	DNPEP	protein_coding	DNPEP	ENSG00000123992	DNPEP	ensembl_havana	protein_coding	ENST00000457935:c.[690+206T>C]; ENST00000373963:c.[*597T>C]; ENST00000429013:c.[731T>C]; ENST00000373966:c.[*845T>C]; ENST00000273075:c.[773T>C]; ENST00000521459:c.[590+543T>C]; ENST00000523282:c.[797T>C]; ENST00000373972:c.[548T>C]	ENSP00000400944:p.[Val244Ala]; ENSP00000273075:p.[Val258Ala]; ENSP00000431076:p.[Val266Ala]; ENSP00000363083:p.[Val183Ala]	ENSP00000273075:p.Val258Ala	ENST00000273075:c.773T>C	No	Yes
2	220405321	SNV	T	C	No	1		Homozygous	37	37	100	1	18	19	0.486486	38.7838	37	37	20	22		1	1	No	1	200	CHPF	protein_coding	CHPF	ENSG00000123989	CHPF	ensembl_havana	protein_coding	ENST00000243776:c.[1112A>G]; ENST00000535926:c.[626A>G]	ENSP00000243776:p.[Gln371Arg]; ENSP00000445571:p.[Gln209Arg]	ENSP00000243776:p.Gln371Arg	ENST00000243776:c.1112A>G	No	Yes
2	220420956	SNV	A	G	No	1		Homozygous	28	28	100	1	14	14	0.5	35.7857	28	28	13	14		1	1	No	1	200	OBSL1	protein_coding	OBSL1	ENSG00000124006	OBSL1	ensembl_havana	protein_coding	ENST00000603926:c.[4395T>C]; ENST00000265317:c.[1092T>C]; ENST00000404537:c.[4395T>C]; ENST00000373876:c.[4119T>C]; ENST00000456147:c.[1098T>C]; ENST00000265318:c.[3995T>C]; ENST00000604031:c.[999T>C]	ENSP00000265318:p.[Met1332Thr]		ENST00000404537:c.4395T>C	No	Yes
2	220421417	SNV	C	G	No	1		Homozygous	13	13	100	1	7	6	0.461538	37.7692	13	13	10	10		1	1	No	1	200	OBSL1	protein_coding	OBSL1	ENSG00000124006	OBSL1	ensembl_havana	protein_coding	ENST00000265317:c.[792G>C]; ENST00000456147:c.[798G>C]; ENST00000603926:c.[4095G>C]; ENST00000604031:c.[699G>C]; ENST00000404537:c.[4095G>C]; ENST00000265318:c.[3819G>C]; ENST00000373876:c.[3819G>C]	ENSP00000265317:p.[Glu264Asp]; ENSP00000403665:p.[Glu266Asp]; ENSP00000474519:p.[Glu1365Asp]; ENSP00000475126:p.[Glu233Asp]; ENSP00000385636:p.[Glu1365Asp]; ENSP00000265318:p.[Glu1273Asp]; ENSP00000362983:p.[Glu1273Asp]	ENSP00000385636:p.Glu1365Asp	ENST00000404537:c.4095G>C	No	Yes
2	220430203	SNV	C	T	No	1		Heterozygous	16	51	31.3725	1	6	10	0.375	38.0625	16	51	13	13	0	0.803509	0.749362	No	1	200	OBSL1	protein_coding	OBSL1	ENSG00000124006	OBSL1	ensembl_havana	protein_coding	ENST00000265318:c.[2168G>A]; ENST00000603926:c.[2168G>A]; ENST00000373876:c.[2168G>A]; ENST00000289656:c.[929G>A]; ENST00000373873:c.[2168G>A]; ENST00000404537:c.[2168G>A]	ENSP00000265318:p.[Arg723Lys]; ENSP00000474519:p.[Arg723Lys]; ENSP00000362983:p.[Arg723Lys]; ENSP00000289656:p.[Arg310Lys]; ENSP00000362980:p.[Arg723Lys]; ENSP00000385636:p.[Arg723Lys]	ENSP00000385636:p.Arg723Lys	ENST00000404537:c.2168G>A	No	Yes
2	220462640	SNV	G	T	No	1		Homozygous	9	9	100	1	9	0	0	30.7778	9	9	5	6		1	1	No	1	200	STK11IP	protein_coding	STK11IP	ENSG00000144589	STK11IP	ensembl_havana	protein_coding	ENST00000295641:c.[2G>T]; ENST00000456909:c.[-32G>T]	ENSP00000295641:p.Arg1Met		ENST00000456909:c.-32G>T	No	Yes
2	220476443	SNV	C	T	No	1		Homozygous	7	7	100	1	4	3	0.428571	38.1429	7	7	7	7		1	1	No	1	200	STK11IP	protein_coding	STK11IP	ENSG00000144589	STK11IP	ensembl_havana	protein_coding	ENST00000295641:c.[2255C>T]; ENST00000456909:c.[2222C>T]	ENSP00000295641:p.[Ser752Phe]; ENSP00000389383:p.[Ser741Phe]	ENSP00000389383:p.Ser741Phe	ENST00000456909:c.2222C>T	No	Yes
2	223504374	SNV	C	T	No	1		Heterozygous	40	42	95.2381	1	16	24	0.4	38.025	40	42	22	21	0	0.999995	1	No	1	200	FARSB	protein_coding	FARSB	ENSG00000116120	FARSB	ensembl_havana	protein_coding	ENST00000281828:c.[380G>A]; ENST00000536361:c.[83G>A]	ENSP00000281828:p.[Arg127His]; ENSP00000442950:p.[Arg28His]	ENSP00000281828:p.Arg127His	ENST00000281828:c.380G>A	No	Yes
2	231050715	SNV	A	G	No	1		Heterozygous	11	16	68.75	1	5	6	0.454545	38.0909	11	16	11	11	0	0.950663	0.984652	No	1	200	SP110	protein_coding	SP110	ENSG00000135899	SP110	ensembl_havana	protein_coding	ENST00000338556:c.[380T>C]; ENST00000258382:c.[1274T>C]; ENST00000540870:c.[1292T>C]; ENST00000258381:c.[1274T>C]; ENST00000392048:c.[1268T>C]; ENST00000358662:c.[1274T>C]	ENSP00000344049:p.[Leu127Ser]; ENSP00000258382:p.[Leu425Ser]; ENSP00000439558:p.[Leu431Ser]; ENSP00000258381:p.[Leu425Ser]; ENSP00000375902:p.[Leu423Ser]; ENSP00000351488:p.[Leu425Ser]	ENSP00000258381:p.Leu425Ser	ENST00000258381:c.1274T>C	No	Yes
2	231072709	SNV	C	T	No	1		Homozygous	14	14	100	1	4	10	0.285714	37.9286	14	14	10	10		1	1	No	1	200	SP110, SP140	protein_coding, protein_coding	SP110, SP140	ENSG00000135899, ENSG00000079263	SP110, SP140	ensembl_havana, ensembl_havana	protein_coding, protein_coding	ENST00000358662:c.[895G>A]; ENST00000456542:c.[-323+4714C>T]; ENST00000540870:c.[913G>A]; ENST00000258381:c.[895G>A]; ENST00000392048:c.[895G>A]; ENST00000258382:c.[895G>A]; ENST00000338556:c.[151G>A]	ENSP00000351488:p.[Gly299Arg]; ENSP00000439558:p.[Gly305Arg]; ENSP00000258381:p.[Gly299Arg]; ENSP00000375902:p.[Gly299Arg]; ENSP00000258382:p.[Gly299Arg]; ENSP00000344049:p.[Gly51Arg]	ENSP00000258381:p.Gly299Arg	ENST00000258381:c.895G>A	No	Yes
2	231258150	SNV	C	T	No	1		Homozygous	9	10	90	1	7	2	0.222222	39.3333	9	10	7	7		0.976505	0.999971	No	1	200	SP140L	protein_coding	SP140L	ENSG00000185404	SP140L	ensembl_havana	protein_coding	ENST00000415673:c.[1129C>T]; ENST00000243810:c.[1129C>T]; ENST00000396563:c.[1024C>T]; ENST00000444636:c.[1129C>T]	ENSP00000397911:p.[Pro377Ser]; ENSP00000243810:p.[Pro377Ser]; ENSP00000379811:p.[Pro342Ser]; ENSP00000395195:p.[Pro377Ser]	ENSP00000243810:p.Pro377Ser	ENST00000243810:c.1129C>T	No	Yes
2	231738168	SNV	G	A	No	1		Heterozygous	29	34	85.2941	1	23	6	0.206897	33.2069	29	34	18	18	0	0.992446	1	No	1	200	ITM2C	protein_coding	ITM2C	ENSG00000135916	ITM2C	ensembl_havana	protein_coding	ENST00000418408:c.[-30G>A]; ENST00000543957:c.[-30G>A]; ENST00000457215:c.[157G>A]; ENST00000326427:c.[157G>A]; ENST00000409704:c.[-30G>A]; ENST00000335005:c.[121-2167G>A]; ENST00000326407:c.[157G>A]; ENST00000541852:c.[-30G>A]	ENSP00000390655:p.[Gly53Ser]; ENSP00000322730:p.[Gly53Ser]; ENSP00000322100:p.[Gly53Ser]	ENSP00000322730:p.Gly53Ser	ENST00000326427:c.157G>A	No	Yes
2	231740407	SNV	A	G	No	1		Heterozygous	6	64	9.375	1	4	2	0.333333	39.3333	6	64	6	6	0	0.504327	0.85707	No	1	141.221	ITM2C	protein_coding	ITM2C	ENSG00000135916	ITM2C	ensembl_havana	protein_coding	ENST00000543957:c.[148A>G]; ENST00000409704:c.[148A>G]; ENST00000335005:c.[193A>G]; ENST00000457215:c.[334A>G]; ENST00000326427:c.[334A>G]; ENST00000326407:c.[334A>G]; ENST00000418408:c.[148A>G]; ENST00000541852:c.[148A>G]	ENSP00000444899:p.[Met50Val]; ENSP00000387242:p.[Met50Val]; ENSP00000335121:p.[Met65Val]; ENSP00000390655:p.[Met112Val]; ENSP00000322730:p.[Met112Val]; ENSP00000322100:p.[Met112Val]; ENSP00000403257:p.[Met50Val]; ENSP00000440295:p.[Met50Val]	ENSP00000322730:p.Met112Val	ENST00000326427:c.334A>G	No	Yes
2	232087474..232087475	MNV	AT	GA	No	2		Homozygous	6	6	100	1	1	5	0.166667	38.5833	6	6	4	4		1	1	No	1	200	ARMC9	protein_coding	ARMC9	ENSG00000135931	ARMC9	ensembl_havana	protein_coding	ENST00000349938:c.538_539delATinsGA	ENSP00000258417:p.Ile180Glu	ENSP00000258417:p.Ile180Glu	ENST00000349938:c.538_539delATinsGA	No	Yes
2	232325417	SNV	A	C	No	1		Heterozygous	8	408	1.96078	1	1	7	0.125	39.125	8	408	6	6	0	0.0590842	0.456418	No	1	200	NCL	protein_coding	NCL	ENSG00000115053	NCL	ensembl_havana	protein_coding	ENST00000322723:c.774T>G	ENSP00000318195:p.Asp258Glu	ENSP00000318195:p.Asp258Glu	ENST00000322723:c.774T>G	No	Yes
2	232325420	SNV	A	C	No	1		Heterozygous	8	400	2	1	6	2	0.25	36.625	8	400	5	5	0	0.00120075	0.0931766	No	1	200	NCL	protein_coding	NCL	ENSG00000115053	NCL	ensembl_havana	protein_coding	ENST00000322723:c.771T>G	ENSP00000318195:p.Asp257Glu	ENSP00000318195:p.Asp257Glu	ENST00000322723:c.771T>G	No	Yes
2	232325471	SNV	C	A	No	1		Heterozygous	6	364	1.64835	1	6	0	0	38.1667	6	364	5	5	0	0.215259	0.140272	No	1	115.51	NCL	protein_coding	NCL	ENSG00000115053	NCL	ensembl_havana	protein_coding	ENST00000322723:c.720G>T	ENSP00000318195:p.Glu240Asp	ENSP00000318195:p.Glu240Asp	ENST00000322723:c.720G>T	No	Yes
2	232325477	SNV	T	A	No	1		Heterozygous	12	374	3.20856	1	7	5	0.416667	34.0833	12	374	8	8	0	0.0472159	1	No	1	200	NCL	protein_coding	NCL	ENSG00000115053	NCL	ensembl_havana	protein_coding	ENST00000322723:c.714A>T	ENSP00000318195:p.Glu238Asp	ENSP00000318195:p.Glu238Asp	ENST00000322723:c.714A>T	No	Yes
2	232325483	SNV	T	A	No	1		Heterozygous	6	359	1.67131	1	6	0	0	40.5	6	359	3	3	0	0.112914	0.160091	No	1	119.98	NCL	protein_coding	NCL	ENSG00000115053	NCL	ensembl_havana	protein_coding	ENST00000322723:c.708A>T	ENSP00000318195:p.Glu236Asp	ENSP00000318195:p.Glu236Asp	ENST00000322723:c.708A>T	No	Yes
2	232325489	SNV	C	A	No	1		Heterozygous	6	428	1.40187	1	4	2	0.333333	37.6667	6	428	3	3	0	0.000619466	0.429442	No	1	109.186	NCL	protein_coding	NCL	ENSG00000115053	NCL	ensembl_havana	protein_coding	ENST00000322723:c.702G>T	ENSP00000318195:p.Glu234Asp	ENSP00000318195:p.Glu234Asp	ENST00000322723:c.702G>T	No	Yes
2	232326255	SNV	T	A	No	1		Heterozygous	6	467	1.2848	1	6	0	0	38.5	6	467	4	5	0	0.0406889	0.0966049	No	1	101.73	NCL	protein_coding	NCL	ENSG00000115053	NCL	ensembl_havana	protein_coding	ENST00000322723:c.609A>T	ENSP00000318195:p.Glu203Asp	ENSP00000318195:p.Glu203Asp	ENST00000322723:c.609A>T	No	Yes
2	232326285	SNV	T	A	No	1		Heterozygous	8	296	2.7027	1	3	5	0.375	32.75	8	296	6	6	1.27	0.0565269	0.673265	No	1	141.622	NCL	protein_coding	NCL	ENSG00000115053	NCL	ensembl_havana	protein_coding	ENST00000322723:c.579A>T	ENSP00000318195:p.Glu193Asp	ENSP00000318195:p.Glu193Asp	ENST00000322723:c.579A>T	No	Yes
2	232326303	SNV	C	A	No	1		Heterozygous	6	277	2.16606	1	5	1	0.166667	36.6667	6	277	5	5	0.46	0.0777111	0.429436	No	1	107.379	NCL	protein_coding	NCL	ENSG00000115053	NCL	ensembl_havana	protein_coding	ENST00000322723:c.561G>T	ENSP00000318195:p.Glu187Asp	ENSP00000318195:p.Glu187Asp	ENST00000322723:c.561G>T	No	Yes
2	232576599	SNV	G	C	No	1		Heterozygous	8	572	1.3986	1	1	7	0.125	38.625	8	572	6	6	0	0.000311693	0.143594	No	1	144.231	PTMA	protein_coding	PTMA	ENSG00000187514	PTMA	ensembl_havana	protein_coding	ENST00000412128:c.[229-1G>C]; ENST00000409321:c.[181-1G>C]; ENST00000409115:c.[118-1G>C]; ENST00000341369:c.[120G>C]; ENST00000409683:c.[118-1G>C]; ENST00000410064:c.[196-1G>C]; ENST00000448874:c.[*11-1G>C]	ENSP00000344547:p.Glu40Asp		ENST00000409115:c.118-1G>C	No	Yes
2	233243586	SNV	C	T	No	1		Heterozygous	7	94	7.44681	1	3	4	0.428571	39.5714	7	94	5	5	0	0.214392	0.999953	No	1	153.525	ALPP	protein_coding	ALPP	ENSG00000163283	ALPP	ensembl_havana	protein_coding	ENST00000392027:c.74C>T	ENSP00000375881:p.Pro25Leu	ENSP00000375881:p.Pro25Leu	ENST00000392027:c.74C>T	No	Yes
2	233244968	SNV	A	G	No	1		Heterozygous	71	82	86.5854	1	32	39	0.450704	38.9296	71	82	33	32	0	0.999995	1	No	1	200	ALPP, AC068134.8	protein_coding, antisense	ALPP, AC068134.8	ENSG00000163283, ENSG00000224516	ALPP, AC068134.8	ensembl_havana, havana	protein_coding, antisense	ENST00000392027:c.730A>G	ENSP00000375881:p.Ser244Gly	ENSP00000375881:p.Ser244Gly	ENST00000392027:c.730A>G	No	Yes
2	233273049	SNV	A	G	No	1		Homozygous	15	16	93.75	1	5	10	0.333333	39.5333	15	16	11	10		0.990205	0.999569	No	1	200	ALPPL2	protein_coding	ALPPL2	ENSG00000163286	ALPPL2	ensembl_havana	protein_coding	ENST00000295453:c.721A>G	ENSP00000295453:p.Ser241Gly	ENSP00000295453:p.Ser241Gly	ENST00000295453:c.721A>G	No	Yes
2	233273107	SNV	A	G	No	1		Heterozygous	9	17	52.9412	1	2	7	0.222222	36.4444	9	17	6	6	0	0.204471	0.97667	No	1	200	ALPPL2	protein_coding	ALPPL2	ENSG00000163286	ALPPL2	ensembl_havana	protein_coding	ENST00000295453:c.779A>G	ENSP00000295453:p.His260Arg	ENSP00000295453:p.His260Arg	ENST00000295453:c.779A>G	No	Yes
2	233708806	SNV	A	G	No	1		Homozygous	17	17	100	1	10	7	0.411765	39	17	17	13	13		1	1	No	1	200	GIGYF2	protein_coding	GIGYF2	ENSG00000204120	GIGYF2	ensembl_havana	protein_coding	ENST00000409547:c.[2940A>G]; ENST00000373566:c.[3006A>G]; ENST00000409480:c.[3006A>G]; ENST00000452341:c.[2467A>G]; ENST00000373563:c.[2940A>G]; ENST00000409451:c.[3003A>G]; ENST00000409196:c.[2922A>G]; ENST00000426102:c.[27A>G]	ENSP00000411505:p.[Thr823Ala]		ENST00000373566:c.3006A>G	No	Yes
2	234183368	SNV	A	G	No	1		Heterozygous	6	8	75	1	4	2	0.333333	38.8333	6	8	5	5	0	0.962447	0.999702	No	1	200	ATG16L1	protein_coding	ATG16L1	ENSG00000085978	ATG16L1	ensembl_havana	protein_coding	ENST00000347464:c.[409A>G]; ENST00000444735:c.[517A>G]; ENST00000392020:c.[841A>G]; ENST00000392021:c.[*779A>G]; ENST00000392018:c.[949A>G]; ENST00000373525:c.[466A>G]; ENST00000392017:c.[898A>G]; ENST00000419681:c.[409A>G]	ENSP00000318259:p.[Thr137Ala]; ENSP00000409215:p.[Thr173Ala]; ENSP00000375875:p.[Thr281Ala]; ENSP00000375873:p.[Thr317Ala]; ENSP00000362625:p.[Thr156Ala]; ENSP00000375872:p.[Thr300Ala]; ENSP00000398773:p.[Thr137Ala]	ENSP00000375872:p.Thr300Ala	ENST00000392017:c.898A>G	No	Yes
2	234750831	SNV	T	C	No	1		Homozygous	38	38	100	1	18	20	0.473684	38.7632	38	38	20	20		1	1	No	1	200	HJURP	protein_coding	HJURP	ENSG00000123485	HJURP	ensembl_havana	protein_coding	ENST00000414924:c.[340A>G]; ENST00000454020:c.[472A>G]; ENST00000441687:c.[340A>G]; ENST00000411486:c.[595A>G]; ENST00000453122:c.[*161A>G]; ENST00000432087:c.[433A>G]	ENSP00000393253:p.[Arg114Gly]; ENSP00000414051:p.[Arg158Gly]; ENSP00000401944:p.[Arg114Gly]; ENSP00000414109:p.[Arg199Gly]; ENSP00000407208:p.[Arg145Gly]	ENSP00000414109:p.Arg199Gly	ENST00000411486:c.595A>G	No	Yes
2	235950461	SNV	G	C	No	1		Homozygous	20	21	95.2381	1	13	7	0.35	35.7	20	21	11	10		0.999425	1	No	1	200	SH3BP4	protein_coding	SH3BP4	ENSG00000130147	SH3BP4	ensembl_havana	protein_coding	ENST00000344528:c.[1048G>C]; ENST00000409212:c.[1048G>C]; ENST00000392011:c.[1048G>C]	ENSP00000340237:p.[Glu350Gln]; ENSP00000386862:p.[Glu350Gln]; ENSP00000375867:p.[Glu350Gln]	ENSP00000386862:p.Glu350Gln	ENST00000409212:c.1048G>C	No	Yes
2	235951613	SNV	G	A	No	1		Heterozygous	17	20	85	1	9	8	0.470588	36.4118	17	20	14	16	0	0.980021	1	No	1	200	SH3BP4	protein_coding	SH3BP4	ENSG00000130147	SH3BP4	ensembl_havana	protein_coding	ENST00000392011:c.[2200G>A]; ENST00000409212:c.[2200G>A]; ENST00000344528:c.[2200G>A]	ENSP00000375867:p.[Glu734Lys]; ENSP00000386862:p.[Glu734Lys]; ENSP00000340237:p.[Glu734Lys]	ENSP00000386862:p.Glu734Lys	ENST00000409212:c.2200G>A	No	Yes
2	236957822	SNV	G	A	No	1		Homozygous	19	19	100	1	6	13	0.315789	36.8947	19	19	12	12		1	1	No	1	200	AGAP1	protein_coding	AGAP1	ENSG00000157985	AGAP1	ensembl_havana	protein_coding	ENST00000336665:c.[1852G>A]; ENST00000409538:c.[2647G>A]; ENST00000418654:c.[667G>A]; ENST00000453371:c.[214G>A]; ENST00000428334:c.[1528G>A]; ENST00000304032:c.[2011G>A]	ENSP00000338378:p.[Val618Ile]; ENSP00000386897:p.[Val883Ile]; ENSP00000393838:p.[Val223Ile]; ENSP00000413756:p.[Val72Ile]; ENSP00000411824:p.[Val510Ile]; ENSP00000307634:p.[Val671Ile]	ENSP00000307634:p.Val671Ile	ENST00000304032:c.2011G>A	No	Yes
2	238427194	SNV	T	C	No	1		Heterozygous	6	66	9.09091	1	4	2	0.333333	38.6667	6	66	6	6	0	0.104622	0.974357	No	1	140.973	MLPH	protein_coding	MLPH	ENSG00000115648	MLPH	ensembl_havana	protein_coding	ENST00000409373:c.[458T>C]; ENST00000338530:c.[458T>C]; ENST00000264605:c.[458T>C]; ENST00000410032:c.[458T>C]; ENST00000445024:c.[458T>C]	ENSP00000386780:p.[Leu153Pro]; ENSP00000341845:p.[Leu153Pro]; ENSP00000264605:p.[Leu153Pro]; ENSP00000386338:p.[Leu153Pro]; ENSP00000414849:p.[Leu153Pro]	ENSP00000264605:p.Leu153Pro	ENST00000264605:c.458T>C	No	Yes
2	238427251	SNV	G	A	No	1		Heterozygous	12	101	11.8812	1	11	1	0.0833333	36.75	12	101	7	7	0	0.425866	0.435773	No	1	200	MLPH	protein_coding	MLPH	ENSG00000115648	MLPH	ensembl_havana	protein_coding	ENST00000409373:c.[515G>A]; ENST00000445024:c.[515G>A]; ENST00000264605:c.[515G>A]; ENST00000410032:c.[515G>A]; ENST00000338530:c.[515G>A]	ENSP00000386780:p.[Gly172Asp]; ENSP00000414849:p.[Gly172Asp]; ENSP00000264605:p.[Gly172Asp]; ENSP00000386338:p.[Gly172Asp]; ENSP00000341845:p.[Gly172Asp]	ENSP00000264605:p.Gly172Asp	ENST00000264605:c.515G>A	No	Yes
2	238449007	SNV	T	C	No	1		Heterozygous	10	74	13.5135	1	4	6	0.4	37.7	10	74	8	8	0	0.563146	0.781108	No	1	200	MLPH	protein_coding	MLPH	ENSG00000115648	MLPH	ensembl_havana	protein_coding	ENST00000264605:c.[1121T>C]; ENST00000410032:c.[692T>C]; ENST00000437893:c.[401T>C]; ENST00000445024:c.[1121T>C]; ENST00000436965:c.[281T>C]; ENST00000409373:c.[917T>C]; ENST00000338530:c.[1037T>C]; ENST00000415753:c.[182T>C]	ENSP00000264605:p.[Val374Ala]; ENSP00000386338:p.[Val231Ala]; ENSP00000412438:p.[Val134Ala]; ENSP00000414849:p.[Val374Ala]; ENSP00000405337:p.[Val94Ala]; ENSP00000386780:p.[Val306Ala]; ENSP00000341845:p.[Val346Ala]; ENSP00000409897:p.[Val61Ala]	ENSP00000264605:p.Val374Ala	ENST00000264605:c.1121T>C	No	Yes
2	238483729	SNV	A	G	No	1		Homozygous	34	34	100	1	10	24	0.294118	37.5882	34	34	19	22		1	1	No	1	200	RAB17	protein_coding	RAB17	ENSG00000124839	RAB17	ensembl_havana	protein_coding	ENST00000409822:c.[191T>C]; ENST00000264601:c.[572T>C]; ENST00000414278:c.[*363T>C]; ENST00000409576:c.[10-500T>C]; ENST00000392001:c.[*261T>C]; ENST00000538644:c.[191T>C]	ENSP00000386589:p.[Leu64Pro]; ENSP00000264601:p.[Leu191Pro]; ENSP00000443461:p.[Leu64Pro]	ENSP00000264601:p.Leu191Pro	ENST00000264601:c.572T>C	No	Yes
2	238494742	SNV	A	G	No	1		Homozygous	39	39	100	1	14	25	0.358974	35.9231	39	39	23	21		1	1	No	1	200	RAB17	protein_coding	RAB17	ENSG00000124839	RAB17	ensembl_havana	protein_coding	ENST00000409822:c.[-225+4368T>C]; ENST00000264601:c.[56T>C]; ENST00000414278:c.[56T>C]; ENST00000411462:c.[56T>C]; ENST00000430445:c.[-2T>C]; ENST00000392001:c.[56T>C]; ENST00000409576:c.[9+47T>C]; ENST00000538644:c.[-174T>C]	ENSP00000264601:p.[Val19Ala]; ENSP00000389332:p.[Val19Ala]; ENSP00000400240:p.[Val19Ala]; ENSP00000375858:p.[Val19Ala]	ENSP00000264601:p.Val19Ala	ENST00000264601:c.56T>C	No	Yes
2	238672290	SNV	C	T	No	1		Heterozygous	10	46	21.7391	1	8	2	0.2	39.4	10	46	8	8	0	0.492894	0.401958	No	1	200	LRRFIP1	protein_coding	LRRFIP1	ENSG00000124831	LRRFIP1	ensembl_havana	protein_coding	ENST00000289175:c.[1766C>T]; ENST00000392000:c.[1934C>T]; ENST00000244815:c.[1862C>T]; ENST00000308482:c.[1459+3442C>T]	ENSP00000289175:p.[Pro589Leu]; ENSP00000375857:p.[Pro645Leu]; ENSP00000244815:p.[Pro621Leu]	ENSP00000244815:p.Pro621Leu	ENST00000244815:c.1862C>T	No	Yes
2	239237751	SNV	A	G	No	1		Homozygous	7	7	100	1	5	2	0.285714	38.2857	7	7	6	6		1	1	No	1	200	TRAF3IP1	protein_coding	TRAF3IP1	ENSG00000204104	TRAF3IP1	ensembl_havana	protein_coding	ENST00000391993:c.[683A>G]; ENST00000373327:c.[683A>G]; ENST00000409739:c.[*552A>G]; ENST00000391994:c.[683A>G]	ENSP00000375851:p.[Asn228Ser]; ENSP00000362424:p.[Asn228Ser]; ENSP00000375852:p.[Asn228Ser]	ENSP00000362424:p.Asn228Ser	ENST00000373327:c.683A>G	No	Yes
2	241073353^241073354	Insertion	-	A	No	1		Heterozygous	8	346	2.31214	1	2	6	0.25	39.25	8	346	5	5	0	0.179763	0.966352	Yes	6	200	MYEOV2	protein_coding	MYEOV2	ENSG00000172428	MYEOV2	ensembl_havana	protein_coding	ENST00000307266:c.[225_226insT]; ENST00000607357:c.[132_133insT]	ENSP00000304147:p.[Asn76fs]; ENSP00000475979:p.[Asn45fs]	ENSP00000304147:p.Asn76fs	ENST00000307266:c.225_226insT	No	Yes
2	241405528	SNV	A	G	No	1		Homozygous	28	28	100	1	17	11	0.392857	38.6071	28	28	20	20		1	1	No	1	200	GPC1	protein_coding	GPC1	ENSG00000063660	GPC1	ensembl_havana	protein_coding	ENST00000420138:c.[1615A>G]; ENST00000455111:c.[751A>G]; ENST00000264039:c.[1498A>G]	ENSP00000415077:p.[Ser539Gly]; ENSP00000390242:p.[Ser251Gly]; ENSP00000264039:p.[Ser500Gly]	ENSP00000264039:p.Ser500Gly	ENST00000264039:c.1498A>G	No	Yes
2	241538074	SNV	A	G	No	1		Homozygous	19	19	100	1	13	6	0.315789	37.0526	19	19	13	13		1	1	No	1	200	CAPN10	protein_coding	CAPN10	ENSG00000142330	CAPN10	ensembl_havana	protein_coding	ENST00000270361:c.[*1160A>G]; ENST00000404753:c.[1950A>G]; ENST00000416591:c.[*711A>G]; ENST00000354082:c.[1531A>G]; ENST00000357048:c.[*192A>G]; ENST00000352879:c.[394A>G]; ENST00000391983:c.[*192A>G]; ENST00000426297:c.[115A>G]; ENST00000391984:c.[1996A>G]; ENST00000270364:c.[273+9183A>G]	ENSP00000270362:p.[Ile511Val]; ENSP00000289381:p.[Ile132Val]; ENSP00000404064:p.[Ile39Val]; ENSP00000375844:p.[Ile666Val]	ENSP00000375844:p.Ile666Val	ENST00000391984:c.1996A>G	No	Yes
2	241828034	SNV	A	G	No	1		Homozygous	85	85	100	1	46	39	0.458824	38.1412	85	85	40	38		1	1	No	1	200	C2orf54	protein_coding	C2orf54	ENSG00000172478	C2orf54	ensembl_havana	protein_coding	ENST00000402775:c.[422T>C]; ENST00000307486:c.[479T>C]; ENST00000388934:c.[926T>C]	ENSP00000385338:p.[Leu141Pro]; ENSP00000302779:p.[Leu160Pro]; ENSP00000373586:p.[Leu309Pro]	ENSP00000302779:p.Leu160Pro	ENST00000307486:c.479T>C	No	Yes
2	242046785	SNV	A	C	No	1		Homozygous	14	15	93.3333	1	13	1	0.0714286	33.3571	14	15	7	7		0.995036	1	No	1	200	PASK	protein_coding	PASK	ENSG00000115687	PASK	ensembl_havana	protein_coding	ENST00000234040:c.[3797T>G]; ENST00000358649:c.[3818T>G]; ENST00000405260:c.[3797T>G]; ENST00000544142:c.[3239T>G]; ENST00000539818:c.[3149T>G]	ENSP00000234040:p.[Phe1266Cys]; ENSP00000351475:p.[Phe1273Cys]; ENSP00000384016:p.[Phe1266Cys]; ENSP00000441374:p.[Phe1080Cys]; ENSP00000443083:p.[Phe1050Cys]	ENSP00000384016:p.Phe1266Cys	ENST00000405260:c.3797T>G	No	Yes
2	242065799	SNV	G	T	No	1		Homozygous	7	7	100	1	5	2	0.285714	38.5714	7	7	5	6		1	1	No	1	200	PASK	protein_coding	PASK	ENSG00000115687	PASK	ensembl_havana	protein_coding	ENST00000544142:c.[1973C>A]; ENST00000358649:c.[2531C>A]; ENST00000234040:c.[2531C>A]; ENST00000539818:c.[1883C>A]; ENST00000403638:c.[2531C>A]; ENST00000405260:c.[2531C>A]	ENSP00000441374:p.[Pro658Gln]; ENSP00000351475:p.[Pro844Gln]; ENSP00000234040:p.[Pro844Gln]; ENSP00000443083:p.[Pro628Gln]; ENSP00000384438:p.[Pro844Gln]; ENSP00000384016:p.[Pro844Gln]	ENSP00000384438:p.Pro844Gln	ENST00000403638:c.2531C>A	No	Yes
2	242122820	SNV	G	A	No	1		Heterozygous	8	11	72.7273	1	5	3	0.375	36	8	11	6	6	0.36	0.921312	0.873068	No	1	200	PPP1R7	protein_coding	PPP1R7	ENSG00000115685	PPP1R7	ensembl_havana	protein_coding	ENST00000234038:c.[*582G>A]; ENST00000415769:c.[266G>A]	ENSP00000413360:p.Arg89Lys		ENST00000234038:c.*582G>A	No	Yes
2	242203916	SNV	A	C	No	1		Homozygous	93	93	100	1	62	31	0.333333	37.3871	93	93	28	27		1	1	No	1	200	HDLBP	protein_coding	HDLBP	ENSG00000115677	HDLBP	ensembl_havana	protein_coding	ENST00000423693:c.[181T>G]; ENST00000452065:c.[181T>G]; ENST00000442714:c.[181T>G]; ENST00000427183:c.[289T>G]; ENST00000413241:c.[181T>G]; ENST00000430918:c.[181T>G]; ENST00000391975:c.[181T>G]; ENST00000420451:c.[181T>G]; ENST00000425989:c.[181T>G]; ENST00000428482:c.[181T>G]; ENST00000391976:c.[181T>G]; ENST00000426343:c.[181T>G]; ENST00000441124:c.[181T>G]; ENST00000422933:c.[181T>G]; ENST000…	ENSP00000413805:p.[Ser61Ala]; ENSP00000387782:p.[Ser61Ala]; ENSP00000413891:p.[Ser61Ala]; ENSP00000399139:p.[Ser97Ala]; ENSP00000390290:p.[Ser61Ala]; ENSP00000403913:p.[Ser61Ala]; ENSP00000375836:p.[Ser61Ala]; ENSP00000403693:p.[Ser61Ala]; ENSP00000390942:p.[Ser61Ala]; ENSP00000405109:p.[Ser61Ala]; ENSP00000375837:p.[Ser61Ala]; ENSP00000394205:p.[Ser61Ala]; ENSP00000396964:p.[Ser61Ala]; ENSP00000…	ENSP00000375836:p.Ser61Ala	ENST00000391975:c.181T>G	No	Yes
2	242371101	SNV	C	T	No	1		Homozygous	7	7	100	1	4	3	0.428571	35.8571	7	7	5	5		1	1	No	1	200	FARP2	protein_coding	FARP2	ENSG00000006607	FARP2	ensembl_havana	protein_coding	ENST00000264042:c.[779C>T]; ENST00000545004:c.[779C>T]; ENST00000373287:c.[779C>T]	ENSP00000264042:p.[Thr260Ile]; ENSP00000443876:p.[Thr260Ile]; ENSP00000362384:p.[Thr260Ile]	ENSP00000264042:p.Thr260Ile	ENST00000264042:c.779C>T	No	Yes
2	242573211	SNV	T	C	No	1		Heterozygous	26	28	92.8571	1	13	13	0.5	37.8077	26	28	15	16	0	0.999852	1	No	1	200	THAP4	protein_coding	THAP4	ENSG00000176946	THAP4	ensembl_havana	protein_coding	ENST00000407315:c.361A>G	ENSP00000385006:p.Ser121Gly	ENSP00000385006:p.Ser121Gly	ENST00000407315:c.361A>G	No	Yes
2	242610773	SNV	T	A	No	1		Homozygous	47	47	100	1	22	25	0.468085	37.1702	47	47	23	23		1	1	No	1	200	ATG4B	protein_coding	ATG4B	ENSG00000168397	ATG4B	ensembl_havana	protein_coding	ENST00000428861:c.[572T>A]; ENST00000402096:c.[839T>A]; ENST00000404914:c.[1061T>A]; ENST00000405546:c.[1061T>A]; ENST00000344376:c.[*887T>A]; ENST00000396411:c.[839T>A]; ENST00000474739:c.[1019T>A]	ENSP00000404783:p.[Leu191Gln]; ENSP00000384661:p.[Leu280Gln]; ENSP00000384259:p.[Leu354Gln]; ENSP00000383964:p.[Leu354Gln]; ENSP00000379692:p.[Leu280Gln]; ENSP00000442378:p.[Leu340Gln]	ENSP00000383964:p.Leu354Gln	ENST00000405546:c.1061T>A	No	Yes
2	242690745	SNV	C	T	No	1		Homozygous	9	10	90	1	5	4	0.444444	36.2222	9	10	8	8		0.976505	0.999561	No	1	200	D2HGDH	protein_coding	D2HGDH	ENSG00000180902	D2HGDH	ensembl_havana	protein_coding	ENST00000436747:c.[*1398C>T]; ENST00000454048:c.[185C>T]; ENST00000403782:c.[680C>T]; ENST00000432449:c.[341C>T]; ENST00000321264:c.[1082C>T]; ENST00000400769:c.[854-4519C>T]	ENSP00000404596:p.[Ala62Val]; ENSP00000384723:p.[Ala227Val]; ENSP00000395837:p.[Ala114Val]; ENSP00000315351:p.[Ala361Val]		ENST00000436747:c.*1398C>T	No	Yes
3	8955389	SNV	C	T	No	1		Homozygous	21	22	95.4545	1	12	9	0.428571	39.1905	21	22	13	13		0.999784	1	No	1	200	RAD18	protein_coding	RAD18	ENSG00000070950	RAD18	ensembl_havana	protein_coding	ENST00000415439:c.[890-1333G>A]; ENST00000264926:c.[905G>A]	ENSP00000264926:p.Arg302Gln	ENSP00000264926:p.Arg302Gln	ENST00000264926:c.905G>A	No	Yes
3	9948059	SNV	G	A	No	1		Homozygous	14	14	100	1	8	6	0.428571	37.3571	14	14	12	11		1	1	No	1	200	IL17RE	protein_coding	IL17RE	ENSG00000163701	IL17RE	ensembl_havana	protein_coding	ENST00000421412:c.[379G>A]; ENST00000383814:c.[280G>A]; ENST00000454992:c.[160G>A]; ENST00000383815:c.[264G>A]; ENST00000454190:c.[280G>A]; ENST00000434065:c.[144G>A]; ENST00000444427:c.[133-331G>A]; ENST00000295980:c.[280G>A]	ENSP00000404916:p.[Gly127Ser]; ENSP00000373325:p.[Gly94Ser]; ENSP00000400768:p.[Gly54Ser]; ENSP00000388086:p.[Gly94Ser]; ENSP00000295980:p.[Gly94Ser]		ENST00000383815:c.264G>A	No	Yes
3	9955661	SNV	T	A	No	1		Homozygous	22	22	100	1	9	13	0.409091	36.0909	22	22	15	15		1	1	No	1	200	IL17RE	protein_coding	IL17RE	ENSG00000163701	IL17RE	ensembl_havana	protein_coding	ENST00000383814:c.[1249T>A]; ENST00000295980:c.[1249T>A]; ENST00000383815:c.[*672T>A]; ENST00000421412:c.[1348T>A]; ENST00000434065:c.[*672T>A]; ENST00000454190:c.[1249T>A]	ENSP00000373325:p.[Ser417Thr]; ENSP00000295980:p.[Ser417Thr]; ENSP00000404916:p.[Ser450Thr]; ENSP00000388086:p.[Ser417Thr]		ENST00000383815:c.*672T>A	No	Yes
3	9956181	SNV	C	T	No	1		Homozygous	9	9	100	1	5	4	0.444444	38	9	9	7	7		1	1	No	1	200	IL17RE	protein_coding	IL17RE	ENSG00000163701	IL17RE	ensembl_havana	protein_coding	ENST00000295980:c.[1297-51C>T]; ENST00000434065:c.[*720-51C>T]; ENST00000421412:c.[1396-51C>T]; ENST00000454190:c.[1319C>T]; ENST00000383815:c.[*815C>T]; ENST00000383814:c.[1297-51C>T]	ENSP00000388086:p.Pro440Leu		ENST00000383815:c.*815C>T	No	Yes
3	9960070	SNV	C	T	No	1		Homozygous	15	15	100	1	9	6	0.4	37	15	15	13	13		1	1	No	1	200	IL17RC	protein_coding	IL17RC	ENSG00000163702	IL17RC	ensembl_havana	protein_coding	ENST00000412901:c.[281-114C>T]; ENST00000451271:c.[*115C>T]; ENST00000416074:c.[4-149C>T]; ENST00000455057:c.[332C>T]; ENST00000424206:c.[332C>T]; ENST00000295981:c.[545C>T]; ENST00000383812:c.[332C>T]; ENST00000413608:c.[332C>T]; ENST00000434756:c.[280+311C>T]; ENST00000440502:c.[*68C>T]; ENST00000476810:c.[*308C>T]; ENST00000451165:c.[*115C>T]; ENST00000451231:c.[281-149C>T]; ENST00000403601:c.…	ENSP00000407894:p.[Ser111Leu]; ENSP00000390080:p.[Ser111Leu]; ENSP00000295981:p.[Ser182Leu]; ENSP00000373323:p.[Ser111Leu]; ENSP00000396064:p.[Ser111Leu]; ENSP00000384969:p.[Ser111Leu]	ENSP00000295981:p.Ser182Leu	ENST00000295981:c.545C>T	No	Yes
3	9970031	SNV	A	G	No	1		Homozygous	30	30	100	1	15	15	0.5	38.3333	30	30	21	22		1	1	No	1	200	IL17RC	protein_coding	IL17RC	ENSG00000163702	IL17RC	ensembl_havana	protein_coding	ENST00000451271:c.[*703A>G]; ENST00000295981:c.[1133A>G]; ENST00000413608:c.[920A>G]; ENST00000403601:c.[920A>G]; ENST00000451231:c.[*393A>G]; ENST00000383812:c.[875A>G]; ENST00000436503:c.[845A>G]; ENST00000412901:c.[*188A>G]; ENST00000438091:c.[800A>G]; ENST00000434756:c.[*393A>G]; ENST00000416074:c.[488A>G]; ENST00000455057:c.[875A>G]	ENSP00000295981:p.[Gln378Arg]; ENSP00000396064:p.[Gln307Arg]; ENSP00000384969:p.[Gln307Arg]; ENSP00000373323:p.[Gln292Arg]; ENSP00000401128:p.[Gln282Arg]; ENSP00000414609:p.[Gln267Arg]; ENSP00000395315:p.[Gln163Arg]; ENSP00000407894:p.[Gln292Arg]	ENSP00000295981:p.Gln378Arg	ENST00000295981:c.1133A>G	No	Yes
3	10302056	SNV	A	G	No	1		Homozygous	12	12	100	1	6	6	0.5	35.6667	12	12	8	9		1	1	No	1	200	TATDN2, RP11-438J1.1	protein_coding, protein_coding	TATDN2, RP11-438J1.1	ENSG00000157014, ENSG00000272410	TATDN2, RP11-438J1.1	ensembl_havana, havana	protein_coding, protein_coding	ENST00000437082:c.[479A>G]; ENST00000450534:c.[*94A>G]; ENST00000448281:c.[650A>G]; ENST00000287652:c.[650A>G]	ENSP00000402783:p.[His160Arg]; ENSP00000408736:p.[His217Arg]; ENSP00000287652:p.[His217Arg]	ENSP00000287652:p.His217Arg	ENST00000287652:c.650A>G	No	Yes
3	10302172	SNV	G	A	No	1		Homozygous	19	19	100	1	10	9	0.473684	37.3158	19	19	15	15		1	1	No	1	200	TATDN2, RP11-438J1.1	protein_coding, protein_coding	TATDN2, RP11-438J1.1	ENSG00000157014, ENSG00000272410	TATDN2, RP11-438J1.1	ensembl_havana, havana	protein_coding, protein_coding	ENST00000450534:c.[*210G>A]; ENST00000287652:c.[766G>A]; ENST00000437082:c.[595G>A]; ENST00000448281:c.[766G>A]	ENSP00000287652:p.[Val256Ile]; ENSP00000402783:p.[Val199Ile]; ENSP00000408736:p.[Val256Ile]	ENSP00000287652:p.Val256Ile	ENST00000287652:c.766G>A	No	Yes
3	11643465	SNV	T	C	No	1		Homozygous	15	15	100	1	6	9	0.4	36.2667	15	15	10	10		1	1	No	1	200	VGLL4	protein_coding	VGLL4	ENSG00000144560	VGLL4	ensembl_havana	protein_coding	ENST00000419541:c.[96A>G]; ENST00000458499:c.[84A>G]; ENST00000437722:c.[-82A>G]; ENST00000413604:c.[-82A>G]; ENST00000417206:c.[96A>G]; ENST00000273038:c.[96A>G]; ENST00000426568:c.[*103A>G]; ENST00000424709:c.[-82A>G]; ENST00000430365:c.[114A>G]; ENST00000418000:c.[96A>G]; ENST00000445411:c.[96A>G]; ENST00000417466:c.[*252A>G]; ENST00000404339:c.[111A>G]	ENSP00000395557:p.[Ile32Met]; ENSP00000394123:p.[Ile28Met]; ENSP00000391932:p.[Ile32Met]; ENSP00000273038:p.[Ile32Met]; ENSP00000404251:p.[Ile38Met]; ENSP00000394439:p.[Ile32Met]; ENSP00000412923:p.[Ile32Met]; ENSP00000384705:p.[Ile37Met]	ENSP00000273038:p.Ile32Met	ENST00000273038:c.96A>G	No	Yes
3	12880929^12880930	Insertion	-	T	No	1		Heterozygous	18	992	1.81452	1	9	9	0.5	39.0556	18	992	12	11	0	0.0218184	0.662139	Yes	7	200	CAND2, RPL32	protein_coding, protein_coding	CAND2, RPL32	ENSG00000144712, ENSG00000144713	CAND2, RPL32	ensembl_havana, ensembl_havana	protein_coding, protein_coding	ENST00000396957:c.[196_197insA]; ENST00000396953:c.[196_197insA]; ENST00000454887:c.[267+7858_267+7859insT]; ENST00000435983:c.[196_197insA]; ENST00000429711:c.[196_197insA]; ENST00000457131:c.[196_197insA]; ENST00000273223:c.[250_251insA]	ENSP00000380158:p.[Thr66fs]; ENSP00000380156:p.[Thr66fs]; ENSP00000388674:p.[Thr66fs]; ENSP00000416429:p.[Thr66fs]; ENSP00000412393:p.[Thr66fs]; ENSP00000339064:p.[Thr84fs]	ENSP00000416429:p.Thr66fs	ENST00000429711:c.196_197insA	No	Yes
3	13361287	SNV	C	T	No	1		Homozygous	37	37	100	1	15	22	0.405405	36.8919	37	37	20	20		1	1	No	1	200	NUP210	protein_coding	NUP210	ENSG00000132182	NUP210	ensembl_havana	protein_coding	ENST00000254508:c.5359G>A	ENSP00000254508:p.Val1787Met	ENSP00000254508:p.Val1787Met	ENST00000254508:c.5359G>A	No	Yes
3	13361391	SNV	A	G	No	1		Homozygous	32	32	100	1	12	20	0.375	36.0625	32	32	22	21		1	1	No	1	200	NUP210	protein_coding	NUP210	ENSG00000132182	NUP210	ensembl_havana	protein_coding	ENST00000254508:c.5255T>C	ENSP00000254508:p.Leu1752Ser	ENSP00000254508:p.Leu1752Ser	ENST00000254508:c.5255T>C	No	Yes
3	13395579	SNV	C	A	No	1		Homozygous	6	6	100	1	5	1	0.166667	37.3333	6	6	4	4		1	1	No	1	200	NUP210	protein_coding	NUP210	ENSG00000132182	NUP210	ensembl_havana	protein_coding	ENST00000254508:c.2357G>T	ENSP00000254508:p.Arg786Leu	ENSP00000254508:p.Arg786Leu	ENST00000254508:c.2357G>T	No	Yes
3	13407556	SNV	T	C	No	1		Homozygous	7	7	100	1	6	1	0.142857	35.1429	7	7	5	6		1	1	No	1	200	NUP210	protein_coding	NUP210	ENSG00000132182	NUP210	ensembl_havana	protein_coding	ENST00000254508:c.1822A>G	ENSP00000254508:p.Ile608Val	ENSP00000254508:p.Ile608Val	ENST00000254508:c.1822A>G	No	Yes
3	14187449	SNV	G	T	No	1		Homozygous	9	9	100	1	4	5	0.444444	39.4444	9	9	5	5		1	1	No	1	200	RP11-434D12.1, AC093495.4, XPC	protein_coding, antisense, protein_coding	RP11-434D12.1, AC093495.4, XPC	ENSG00000268279, ENSG00000228242, ENSG00000154767	RP11-434D12.1, AC093495.4, XPC	havana, havana, ensembl_havana	protein_coding, antisense, protein_coding	ENST00000608606:c.[*198+266G>T]; ENST00000476581:c.[*2268C>A]; ENST00000285021:c.[2815C>A]; ENST00000449060:c.[2704C>A]	ENSP00000285021:p.[Gln939Lys]; ENSP00000404002:p.[Gln902Lys]	ENSP00000285021:p.Gln939Lys	ENST00000285021:c.2815C>A	No	Yes
3	14239609	SNV	T	A	No	1		Heterozygous	6	318	1.88679	1	0	6	0	37.3333	6	318	5	5	0	0.00277196	0.031132	No	1	101.975	LSM3	protein_coding	LSM3	ENSG00000170860	LSM3	ensembl_havana	protein_coding	ENST00000306024:c.302T>A	ENSP00000302160:p.Val101Asp	ENSP00000302160:p.Val101Asp	ENST00000306024:c.302T>A	No	Yes
3	16327855	SNV	T	G	No	1		Homozygous	11	11	100	1	7	4	0.363636	39	11	11	9	9		1	1	No	1	200	OXNAD1	protein_coding	OXNAD1	ENSG00000154814	OXNAD1	ensembl_havana	protein_coding	ENST00000452581:c.[126T>G]; ENST00000606098:c.[190T>G]; ENST00000435829:c.[244T>G]; ENST00000544043:c.[244T>G]; ENST00000442255:c.[*151T>G]; ENST00000605932:c.[190T>G]; ENST00000285083:c.[190T>G]	ENSP00000397374:p.[Cys42Trp]; ENSP00000476239:p.[Ser64Ala]; ENSP00000389872:p.[Ser82Ala]; ENSP00000437967:p.[Ser82Ala]; ENSP00000475547:p.[Ser64Ala]; ENSP00000285083:p.[Ser64Ala]	ENSP00000285083:p.Ser64Ala	ENST00000285083:c.190T>G	No	Yes
3	24006477	SNV	T	A	No	1		Homozygous	9	9	100	1	6	3	0.333333	38.7778	9	9	7	7		1	1	No	1	200	NR1D2	protein_coding	NR1D2	ENSG00000174738	NR1D2	ensembl_havana	protein_coding	ENST00000383773:c.[*36T>A]; ENST00000312521:c.[1156T>A]	ENSP00000310006:p.Leu386Met	ENSP00000310006:p.Leu386Met	ENST00000312521:c.1156T>A	No	Yes
3	33055721	SNV	A	G	No	1		Homozygous	22	22	100	1	10	12	0.454545	38.5909	22	22	18	17		1	1	No	1	200	GLB1	protein_coding	GLB1	ENSG00000170266	GLB1	ensembl_havana	protein_coding	ENST00000307363:c.[1561T>C]; ENST00000307377:c.[1168T>C]; ENST00000399402:c.[1471T>C]; ENST00000445488:c.[1705T>C]	ENSP00000306920:p.[Cys521Arg]; ENSP00000305920:p.[Cys390Arg]; ENSP00000382333:p.[Cys491Arg]; ENSP00000393377:p.[Cys569Arg]	ENSP00000306920:p.Cys521Arg	ENST00000307363:c.1561T>C	No	Yes
3	33450810^33450811	Insertion	-	T	No	1		Heterozygous	6	54	11.1111	1	2	4	0.333333	33.3333	6	54	4	3	0	0.121345	0.985668	Yes	6	200	UBP1	protein_coding	UBP1	ENSG00000153560	UBP1	ensembl_havana	protein_coding	ENST00000283628:c.[736_737insA]; ENST00000411650:c.[-15_-14insA]; ENST00000447368:c.[736_737insA]; ENST00000283629:c.[736_737insA]	ENSP00000283628:p.[Thr246fs]; ENSP00000395558:p.[Thr246fs]; ENSP00000283629:p.[Thr246fs]	ENSP00000283629:p.Thr246fs	ENST00000283629:c.736_737insA	No	Yes
3	33458266	SNV	T	C	No	1		Homozygous	22	22	100	1	8	14	0.363636	38.1818	22	22	14	13		1	1	No	1	200	UBP1	protein_coding	UBP1	ENSG00000153560	UBP1	ensembl_havana	protein_coding	ENST00000283629:c.[326A>G]; ENST00000283628:c.[326A>G]; ENST00000456378:c.[326A>G]; ENST00000447368:c.[326A>G]	ENSP00000283629:p.[Asn109Ser]; ENSP00000283628:p.[Asn109Ser]; ENSP00000401614:p.[Asn109Ser]; ENSP00000395558:p.[Asn109Ser]	ENSP00000283629:p.Asn109Ser	ENST00000283629:c.326A>G	No	Yes
3	37366882	SNV	C	T	No	1		Homozygous	11	11	100	1	5	6	0.454545	34.1818	11	11	9	9		1	1	No	1	200	GOLGA4	protein_coding	GOLGA4	ENSG00000144674	GOLGA4	ensembl_havana	protein_coding	ENST00000361924:c.[3505C>T]; ENST00000444882:c.[478-40689C>T]; ENST00000437131:c.[3118C>T]; ENST00000356847:c.[3571C>T]	ENSP00000354486:p.[Arg1169Trp]; ENSP00000405842:p.[Arg1040Trp]; ENSP00000349305:p.[Arg1191Trp]	ENSP00000354486:p.Arg1169Trp	ENST00000361924:c.3505C>T	No	Yes
3	39184959	SNV	C	T	No	1		Homozygous	6	6	100	1	5	1	0.166667	37.6667	6	6	5	5		1	1	No	1	200	CSRNP1	protein_coding	CSRNP1	ENSG00000144655	CSRNP1	ensembl_havana	protein_coding	ENST00000514182:c.[1357G>A]; ENST00000273153:c.[1357G>A]	ENSP00000422532:p.[Val453Ile]; ENSP00000273153:p.[Val453Ile]	ENSP00000273153:p.Val453Ile	ENST00000273153:c.1357G>A	No	Yes
3	40503495^40503496	Insertion	-	A	No	1		Heterozygous	36	1198	3.00501	1	20	16	0.444444	39.5278	36	1198	21	21	0	0.00836827	0.999997	Yes	6	200	RPL14	protein_coding	RPL14	ENSG00000188846	RPL14	ensembl_havana	protein_coding	ENST00000338970:c.[420_421insA]; ENST00000396203:c.[420_421insA]; ENST00000435633:c.[*534_*535insA]; ENST00000416518:c.[*43_*44insA]	ENSP00000345156:p.[Ala143fs]; ENSP00000379506:p.[Ala143fs]		ENST00000435633:c.*534_*535insA	No	Yes
3	40503563^40503564	Insertion	-	A	No	1		Heterozygous	15	819	1.8315	1	7	8	0.466667	38.1333	15	819	9	9	0	0.175633	0.397912	Yes	6	200	RPL14	protein_coding	RPL14	ENSG00000188846	RPL14	ensembl_havana	protein_coding	ENST00000338970:c.[488_489insA]; ENST00000416518:c.[*111_*112insA]; ENST00000435633:c.[*602_*603insA]; ENST00000396203:c.[488_489insA]	ENSP00000345156:p.[Ile166fs]; ENSP00000379506:p.[Ile166fs]		ENST00000435633:c.*602_*603insA	No	Yes
3	43095101	SNV	A	G	No	1		Homozygous	6	6	100	1	5	1	0.166667	36	6	6	4	6		1	1	No	1	200	KRBOX1, FAM198A	protein_coding, protein_coding	KRBOX1, FAM198A	ENSG00000273291, ENSG00000144649	KRBOX1, FAM198A	havana, ensembl_havana	protein_coding, protein_coding	ENST00000273146:c.[1379A>G]; ENST00000488863:c.[92A>G]; ENST00000443313:c.[*45A>G]; ENST00000430121:c.[1379A>G]	ENSP00000273146:p.[Gln460Arg]; ENSP00000439905:p.[Gln31Arg]; ENSP00000407301:p.[Gln460Arg]	ENSP00000407301:p.Gln460Arg	ENST00000430121:c.1379A>G	No	Yes
3	43647271	SNV	T	G	No	1		Homozygous	10	10	100	1	8	2	0.2	37.6	10	10	8	8		1	1	No	1	200	ANO10	protein_coding	ANO10	ENSG00000160746	ANO10	ensembl_havana	protein_coding	ENST00000439141:c.[74A>C]; ENST00000413397:c.[74A>C]; ENST00000444344:c.[74A>C]; ENST00000414522:c.[74A>C]; ENST00000428831:c.[74A>C]; ENST00000436073:c.[74A>C]; ENST00000451430:c.[74A>C]; ENST00000427171:c.[74A>C]; ENST00000292246:c.[74A>C]; ENST00000428472:c.[74A>C]; ENST00000456438:c.[74A>C]; ENST00000350459:c.[74A>C]; ENST00000396091:c.[74A>C]	ENSP00000397360:p.[Gln25Pro]; ENSP00000399103:p.[Gln25Pro]; ENSP00000402010:p.[Gln25Pro]; ENSP00000396990:p.[Gln25Pro]; ENSP00000406712:p.[Gln25Pro]; ENSP00000404988:p.[Gln25Pro]; ENSP00000394119:p.[Gln25Pro]; ENSP00000406432:p.[Gln25Pro]; ENSP00000292246:p.[Gln25Pro]; ENSP00000416266:p.[Gln25Pro]; ENSP00000402845:p.[Gln25Pro]; ENSP00000327767:p.[Gln25Pro]; ENSP00000379398:p.[Gln25Pro]	ENSP00000292246:p.Gln25Pro	ENST00000292246:c.74A>C	No	Yes
3	45779136	SNV	A	T	No	1		Homozygous	31	32	96.875	1	14	17	0.451613	37.5161	31	32	17	17		0.999969	1	No	1	200	SACM1L	protein_coding	SACM1L	ENSG00000211456	SACM1L	ensembl_havana	protein_coding	ENST00000455997:c.[*117A>T]; ENST00000433336:c.[332A>T]; ENST00000389061:c.[1301A>T]; ENST00000441228:c.[*957A>T]; ENST00000541314:c.[1118A>T]; ENST00000418611:c.[992A>T]	ENSP00000412883:p.[Tyr111Phe]; ENSP00000373713:p.[Tyr434Phe]; ENSP00000443373:p.[Tyr373Phe]; ENSP00000396387:p.[Tyr331Phe]		ENST00000455997:c.*117A>T	No	Yes
3	46729757	SNV	C	G	No	1		Homozygous	10	10	100	1	7	3	0.3	38.1	10	10	7	7		1	1	No	1	200	ALS2CL	protein_coding	ALS2CL	ENSG00000178038	ALS2CL	ensembl_havana	protein_coding	ENST00000318962:c.[133G>C]; ENST00000450172:c.[133G>C]; ENST00000434140:c.[133G>C]; ENST00000415953:c.[133G>C]; ENST00000431015:c.[133G>C]	ENSP00000313670:p.[Glu45Gln]; ENSP00000395663:p.[Glu45Gln]; ENSP00000405335:p.[Glu45Gln]; ENSP00000413223:p.[Glu45Gln]; ENSP00000416575:p.[Glu45Gln]	ENSP00000395663:p.Glu45Gln	ENST00000450172:c.133G>C	No	Yes
3	47454398..47454399	MNV	CG	TA	No	2		Homozygous	16	17	94.1176	1	9	7	0.4375	31.9375	16	17	13	13		0.998404	1	No	1	200	PTPN23	protein_coding	PTPN23	ENSG00000076201	PTPN23	ensembl_havana	protein_coding	ENST00000265562:c.[4634_4635delCGinsTA]; ENST00000431726:c.[4256_4257delCGinsTA]; ENST00000602307:c.[*4311_*4312delCGinsTA]	ENSP00000265562:p.[Pro1545Leu]; ENSP00000387825:p.[Pro1419Leu]	ENSP00000265562:p.Pro1545Leu	ENST00000265562:c.4634_4635delCGinsTA	No	Yes
3	47618953	SNV	C	A	No	1		Homozygous	7	8	87.5	1	3	4	0.428571	36.4286	7	8	6	6		0.957626	0.999108	No	1	200	CSPG5	protein_coding	CSPG5	ENSG00000114646	CSPG5	ensembl_havana	protein_coding	ENST00000456150:c.[149G>T]; ENST00000383738:c.[563G>T]; ENST00000264723:c.[563G>T]	ENSP00000392096:p.[Gly50Val]; ENSP00000373244:p.[Gly188Val]; ENSP00000264723:p.[Gly188Val]	ENSP00000373244:p.Gly188Val	ENST00000383738:c.563G>T	No	Yes
3	47887703	SNV	G	C	No	1		Heterozygous	11	20	55	1	8	3	0.272727	35.4545	11	20	8	6	0	0.940025	0.999934	No	1	200	DHX30	protein_coding	DHX30	ENSG00000132153	DHX30	ensembl_havana	protein_coding	ENST00000457607:c.[1225G>C]; ENST00000395745:c.[*1041G>C]; ENST00000348968:c.[1057G>C]; ENST00000445061:c.[1141G>C]; ENST00000446256:c.[1024G>C]	ENSP00000394682:p.[Asp409His]; ENSP00000343442:p.[Asp353His]; ENSP00000405620:p.[Asp381His]; ENSP00000392601:p.[Asp342His]	ENSP00000392601:p.Asp342His	ENST00000446256:c.1024G>C	No	Yes
3	48669447	SNV	C	T	No	1		Homozygous	17	17	100	1	10	7	0.411765	37.6471	17	17	9	9		1	1	No	1	200	SLC26A6	protein_coding	SLC26A6	ENSG00000225697	SLC26A6	ensembl_havana	protein_coding	ENST00000383733:c.[616G>A]; ENST00000395550:c.[616G>A]; ENST00000414944:c.[71G>A]; ENST00000444531:c.[124G>A]; ENST00000431739:c.[464G>A]; ENST00000358747:c.[553G>A]; ENST00000420764:c.[616G>A]; ENST00000455886:c.[512G>A]; ENST00000431213:c.[*98G>A]; ENST00000307364:c.[*294G>A]; ENST00000421649:c.[154G>A]; ENST00000337000:c.[434-217G>A]	ENSP00000373239:p.[Val206Met]; ENSP00000378920:p.[Val206Met]; ENSP00000388721:p.[Arg24His]; ENSP00000404607:p.[Val42Met]; ENSP00000401813:p.[Arg155His]; ENSP00000351597:p.[Val185Met]; ENSP00000404684:p.[Val206Met]; ENSP00000401066:p.[Arg171His]; ENSP00000389922:p.[Val52Met]	ENSP00000351597:p.Val185Met	ENST00000358747:c.553G>A	No	Yes
3	48732480	SNV	T	C	No	1		Homozygous	10	10	100	1	5	5	0.5	35.2	10	10	10	10		1	1	No	1	200	IP6K2	protein_coding	IP6K2	ENSG00000068745	IP6K2	ensembl_havana	protein_coding	ENST00000443853:c.[202+43A>G]; ENST00000328631:c.[202+43A>G]; ENST00000455545:c.[376+43A>G]; ENST00000431721:c.[410A>G]; ENST00000449610:c.[245A>G]; ENST00000413654:c.[202+43A>G]; ENST00000416707:c.[202+43A>G]; ENST00000433104:c.[245A>G]; ENST00000412850:c.[202+43A>G]; ENST00000446860:c.[419A>G]; ENST00000412795:c.[376+43A>G]; ENST00000417896:c.[245A>G]; ENST00000432678:c.[202+43A>G]; ENST0000045…	ENSP00000414139:p.[Asp137Gly]; ENSP00000393077:p.[Asp82Gly]; ENSP00000396904:p.[Asp82Gly]; ENSP00000399052:p.[Asp140Gly]; ENSP00000388116:p.[Asp82Gly]; ENSP00000410950:p.[Asp141Gly]; ENSP00000387394:p.[Asp82Gly]	ENSP00000396904:p.Asp82Gly	ENST00000433104:c.245A>G	No	Yes
3	49054692	SNV	T	C	No	1		Homozygous	28	28	100	1	14	14	0.5	39.5357	28	28	16	16		1	1	No	1	200	DALRD3	protein_coding	DALRD3	ENSG00000178149	DALRD3	ensembl_havana	protein_coding	ENST00000395462:c.[395A>G]; ENST00000441576:c.[896A>G]; ENST00000420952:c.[791A>G]; ENST00000341949:c.[896A>G]; ENST00000313778:c.[395A>G]; ENST00000440857:c.[395A>G]	ENSP00000378846:p.[Gln132Arg]; ENSP00000410623:p.[Gln299Arg]; ENSP00000397385:p.[Gln264Arg]; ENSP00000344989:p.[Gln299Arg]; ENSP00000323265:p.[Gln132Arg]; ENSP00000403770:p.[Gln132Arg]	ENSP00000403770:p.Gln132Arg	ENST00000440857:c.395A>G	No	Yes
3	49200627	SNV	A	G	No	1		Homozygous	14	14	100	1	3	11	0.214286	38.1429	14	14	10	9		1	1	No	1	200	CCDC71	protein_coding	CCDC71	ENSG00000177352	CCDC71	ensembl_havana	protein_coding	ENST00000321895:c.1015T>C	ENSP00000319006:p.Trp339Arg	ENSP00000319006:p.Trp339Arg	ENST00000321895:c.1015T>C	No	Yes
3	49200692	SNV	T	A	No	1		Homozygous	15	15	100	1	7	8	0.466667	39.5333	15	15	12	12		1	1	No	1	200	CCDC71	protein_coding	CCDC71	ENSG00000177352	CCDC71	ensembl_havana	protein_coding	ENST00000321895:c.950A>T	ENSP00000319006:p.Gln317Leu	ENSP00000319006:p.Gln317Leu	ENST00000321895:c.950A>T	No	Yes
3	49548008	SNV	C	G	No	1		Homozygous	18	18	100	1	12	6	0.333333	39.2222	18	18	12	12		1	1	No	1	200	DAG1	protein_coding	DAG1	ENSG00000173402	DAG1	ensembl_havana	protein_coding	ENST00000308775:c.[41C>G]; ENST00000545947:c.[41C>G]; ENST00000452317:c.[41C>G]; ENST00000419218:c.[41C>G]; ENST00000452060:c.[41C>G]; ENST00000431960:c.[41C>G]; ENST00000435508:c.[41C>G]; ENST00000428779:c.[41C>G]; ENST00000541308:c.[41C>G]; ENST00000418588:c.[41C>G]; ENST00000421560:c.[41C>G]; ENST00000538711:c.[41C>G]; ENST00000515359:c.[41C>G]; ENST00000539901:c.[41C>G]	ENSP00000312435:p.[Ser14Trp]; ENSP00000442600:p.[Ser14Trp]; ENSP00000387859:p.[Ser14Trp]; ENSP00000402443:p.[Ser14Trp]; ENSP00000410145:p.[Ser14Trp]; ENSP00000388833:p.[Ser14Trp]; ENSP00000415321:p.[Ser14Trp]; ENSP00000401382:p.[Ser14Trp]; ENSP00000440590:p.[Ser14Trp]; ENSP00000405859:p.[Ser14Trp]; ENSP00000412067:p.[Ser14Trp]; ENSP00000438421:p.[Ser14Trp]; ENSP00000440705:p.[Ser14Trp]; ENSP00000…	ENSP00000442600:p.Ser14Trp	ENST00000545947:c.41C>G	No	Yes
3	49758039	SNV	G	C	No	1		Homozygous	24	24	100	1	22	2	0.0833333	38.3333	24	24	16	15		1	1	No	1	200	RNF123, AMIGO3, GMPPB	protein_coding, protein_coding, protein_coding	RNF123, AMIGO3, GMPPB	ENSG00000164068, ENSG00000176020, ENSG00000173540	RNF123, AMIGO3, GMPPB	ensembl_havana, ensembl_havana, ensembl_havana	protein_coding, protein_coding, protein_coding	ENST00000433785:c.[932G>C]; ENST00000480687:c.[*1146C>G]; ENST00000327697:c.[3596G>C]; ENST00000535833:c.[-1141C>G]; ENST00000457726:c.[*1670G>C]; ENST00000308375:c.[*1146C>G]	ENSP00000416156:p.[Gly311Ala]; ENSP00000328287:p.[Gly1199Ala]		ENST00000480687:c.*1146C>G	No	Yes
3	49760039	SNV	T	C	No	1		Homozygous	22	22	100	1	10	12	0.454545	37	22	22	16	16		1	1	No	1	200	AMIGO3, GMPPB	protein_coding, protein_coding	AMIGO3, GMPPB	ENSG00000176020, ENSG00000173540	AMIGO3, GMPPB	ensembl_havana, ensembl_havana	protein_coding, protein_coding	ENST00000308388:c.[551A>G]; ENST00000480687:c.[551A>G]; ENST00000308375:c.[551A>G]; ENST00000535833:c.[-2819A>G]	ENSP00000311130:p.[Gln184Arg]; ENSP00000418565:p.[Gln184Arg]; ENSP00000309092:p.[Gln184Arg]	ENSP00000418565:p.Gln184Arg	ENST00000480687:c.551A>G	No	Yes
3	49924940	SNV	T	C	No	1		Homozygous	9	9	100	1	8	1	0.111111	39.4444	9	9	7	7		1	1	No	1	200	MST1R	protein_coding	MST1R	ENSG00000164078	MST1R	ensembl_havana	protein_coding	ENST00000296474:c.[4003A>G]; ENST00000411578:c.[*825A>G]; ENST00000344206:c.[3856A>G]	ENSP00000296474:p.[Arg1335Gly]; ENSP00000341325:p.[Arg1286Gly]		ENST00000411578:c.*825A>G	No	Yes
3	49928691	SNV	T	C	No	1		Homozygous	8	8	100	1	5	3	0.375	37.125	8	8	7	7		1	1	No	1	200	MST1R	protein_coding	MST1R	ENSG00000164078	MST1R	ensembl_havana	protein_coding	ENST00000411578:c.[*405A>G]; ENST00000344206:c.[3436A>G]; ENST00000434765:c.[514A>G]; ENST00000296474:c.[3583A>G]; ENST00000440292:c.[643A>G]	ENSP00000341325:p.[Ser1146Gly]; ENSP00000393294:p.[Ser172Gly]; ENSP00000296474:p.[Ser1195Gly]; ENSP00000414792:p.[Ser215Gly]		ENST00000411578:c.*405A>G	No	Yes
3	50220966	SNV	C	T	No	1		Heterozygous	6	65	9.23077	1	2	4	0.333333	38.8333	6	65	5	5	0	0.281862	0.966388	No	1	130.252	SEMA3F	protein_coding	SEMA3F	ENSG00000001617	SEMA3F	ensembl_havana	protein_coding	ENST00000434342:c.[1109C>T]; ENST00000450338:c.[1109C>T]; ENST00000002829:c.[1202C>T]; ENST00000413852:c.[905C>T]	ENSP00000409859:p.[Ser370Leu]; ENSP00000398399:p.[Ser370Leu]; ENSP00000002829:p.[Ser401Leu]; ENSP00000388931:p.[Ser302Leu]	ENSP00000002829:p.Ser401Leu	ENST00000002829:c.1202C>T	No	Yes
3	50222926	SNV	T	A	No	1		Homozygous	67	67	100	1	18	49	0.268657	36.9403	67	67	29	30		1	1	No	1	200	SEMA3F	protein_coding	SEMA3F	ENSG00000001617	SEMA3F	ensembl_havana	protein_coding	ENST00000434342:c.[1414T>A]; ENST00000002829:c.[1507T>A]; ENST00000413852:c.[1210T>A]	ENSP00000409859:p.[Leu472Met]; ENSP00000002829:p.[Leu503Met]; ENSP00000388931:p.[Leu404Met]	ENSP00000002829:p.Leu503Met	ENST00000002829:c.1507T>A	No	Yes
3	50357869	SNV	A	C	No	1		Homozygous	21	21	100	1	6	15	0.285714	34.9524	21	21	12	12		1	1	No	1	200	HYAL2, TUSC2	protein_coding, protein_coding	HYAL2, TUSC2	ENSG00000068001, ENSG00000114383	HYAL2, TUSC2	ensembl_havana, ensembl_havana	protein_coding, protein_coding	ENST00000426286:c.[52T>G]; ENST00000428028:c.[52T>G]; ENST00000424190:c.[52T>G]; ENST00000442581:c.[52T>G]; ENST00000447092:c.[52T>G]; ENST00000458018:c.[52T>G]; ENST00000395139:c.[52T>G]; ENST00000415028:c.[52T>G]; ENST00000357750:c.[52T>G]	ENSP00000409642:p.[Ser18Ala]; ENSP00000414656:p.[Ser18Ala]; ENSP00000398714:p.[Ser18Ala]; ENSP00000406657:p.[Ser18Ala]; ENSP00000401853:p.[Ser18Ala]; ENSP00000399677:p.[Ser18Ala]; ENSP00000378571:p.[Ser18Ala]; ENSP00000405855:p.[Ser18Ala]; ENSP00000350387:p.[Ser18Ala]	ENSP00000401853:p.Ser18Ala	ENST00000447092:c.52T>G	No	Yes
3	50685425^50685426	Insertion	-	A	No	1		Heterozygous	8	95	8.42105	1	4	4	0.5	38.875	8	95	8	8	0	0.206675	0.785238	Yes	6	200	MAPKAPK3	protein_coding	MAPKAPK3	ENSG00000114738	MAPKAPK3	ensembl_havana	protein_coding	ENST00000357955:c.[1097_1098insA]; ENST00000446044:c.[1097_1098insA]; ENST00000451680:c.[239_240insA]	ENSP00000350639:p.[Gln369fs]; ENSP00000396467:p.[Gln369fs]; ENSP00000394894:p.[Gln83fs]	ENSP00000396467:p.Gln369fs	ENST00000446044:c.1097_1098insA	No	Yes
3	51978220	SNV	A	G	No	1		Homozygous	11	11	100	1	5	6	0.454545	37.0909	11	11	10	10		1	1	No	1	200	PARP3	protein_coding	PARP3	ENSG00000041880	PARP3	ensembl_havana	protein_coding	ENST00000498510:c.[299A>G]; ENST00000431474:c.[299A>G]; ENST00000417220:c.[299A>G]; ENST00000471971:c.[*163A>G]; ENST00000398755:c.[320A>G]	ENSP00000417625:p.[His100Arg]; ENSP00000401511:p.[His100Arg]; ENSP00000395951:p.[His100Arg]; ENSP00000381740:p.[His107Arg]	ENSP00000395951:p.His100Arg	ENST00000417220:c.299A>G	No	Yes
3	52510592	SNV	G	A	No	1		Homozygous	30	30	100	1	13	17	0.433333	35.3	30	30	17	16		1	1	No	1	200	NISCH	protein_coding	NISCH	ENSG00000010322	NISCH	ensembl_havana	protein_coding	ENST00000345716:c.[895G>A]; ENST00000479054:c.[895G>A]; ENST00000488380:c.[895G>A]; ENST00000420808:c.[895G>A]	ENSP00000339958:p.[Val299Ile]; ENSP00000418232:p.[Val299Ile]; ENSP00000417812:p.[Val299Ile]; ENSP00000392484:p.[Val299Ile]	ENSP00000339958:p.Val299Ile	ENST00000345716:c.895G>A	No	Yes
3	52563199	SNV	A	T	No	1		Homozygous	218	218	100	1	77	141	0.353211	35.9954	218	218	41	42		1	1	No	1	200	NT5DC2	protein_coding	NT5DC2	ENSG00000168268	NT5DC2	ensembl_havana	protein_coding	ENST00000307092:c.[171T>A]; ENST00000492555:c.[*119T>A]; ENST00000459839:c.[384T>A]; ENST00000422318:c.[384T>A]; ENST00000471522:c.[-118T>A]; ENST00000489316:c.[177T>A]; ENST00000307076:c.[273T>A]	ENSP00000306017:p.[Ser57Arg]; ENSP00000419547:p.[Ser128Arg]; ENSP00000406933:p.[Ser128Arg]; ENSP00000417269:p.[Ser59Arg]; ENSP00000302468:p.[Ser91Arg]	ENSP00000302468:p.Ser91Arg	ENST00000307076:c.273T>A	No	Yes
3	52727257	SNV	G	A	No	1		Homozygous	105	105	100	1	68	37	0.352381	38.1143	105	105	34	34		1	1	No	1	200	GNL3	protein_coding	GNL3	ENSG00000163938	GNL3	ensembl_havana	protein_coding	ENST00000418458:c.[1099G>A]; ENST00000394799:c.[1063G>A]	ENSP00000395772:p.[Val367Met]; ENSP00000378278:p.[Val355Met]	ENSP00000378278:p.Val355Met	ENST00000394799:c.1063G>A	No	Yes
3	52727765..52727767	Deletion	AGG	-	No	3		Heterozygous	68	130	52.3077	1	46	22	0.323529	37.2794	68	130	21	20	0	7.38281e-07	0.665803	No	1	200	GNL3	protein_coding	GNL3	ENSG00000163938	GNL3	ensembl_havana	protein_coding	ENST00000418458:c.[1442_1444delAGG]; ENST00000394799:c.[1406_1408delAGG]	ENSP00000395772:p.[Glu483del]; ENSP00000378278:p.[Glu471del]	ENSP00000378278:p.Glu471del	ENST00000394799:c.1406_1408delAGG	Yes	Yes
3	52727767	SNV	G	C	No	1		Heterozygous	22	130	16.9231	1	10	12	0.454545	37.1	22	130	9	10	0	3.36221e-08	0.739705	No	1	200	GNL3	protein_coding	GNL3	ENSG00000163938	GNL3	ensembl_havana	protein_coding	ENST00000418458:c.[1444G>C]; ENST00000394799:c.[1408G>C]	ENSP00000395772:p.[Glu482Gln]; ENSP00000378278:p.[Glu470Gln]	ENSP00000378278:p.Glu470Gln	ENST00000394799:c.1408G>C	Yes	Yes
3	52727769^52727770	Insertion	-	A	No	1		Heterozygous	8	101	7.92079	1	2	6	0.25	35.25	8	101	3	3	0	1.07445e-06	0.243132	No	1	200	GNL3	protein_coding	GNL3	ENSG00000163938	GNL3	ensembl_havana	protein_coding	ENST00000394799:c.[1410_1411insA]; ENST00000418458:c.[1446_1447insA]	ENSP00000378278:p.[Glu471fs]; ENSP00000395772:p.[Glu483fs]	ENSP00000378278:p.Glu471fs	ENST00000394799:c.1410_1411insA	Yes	Yes
3	52727771	SNV	A	G	No	1		Heterozygous	9	108	8.33333	1	3	6	0.333333	34.8889	9	108	4	4	0.08	2.20789e-06	0.555138	No	1	200	GNL3	protein_coding	GNL3	ENSG00000163938	GNL3	ensembl_havana	protein_coding	ENST00000394799:c.[1412A>G]; ENST00000418458:c.[1448A>G]	ENSP00000378278:p.[Glu471Gly]; ENSP00000395772:p.[Glu483Gly]	ENSP00000378278:p.Glu471Gly	ENST00000394799:c.1412A>G	Yes	Yes
3	52740182	SNV	C	G	No	1		Homozygous	80	80	100	1	80	0	0	37.3625	80	80	17	17		1	1	No	1	200	SPCS1	protein_coding	SPCS1	ENSG00000114902	SPCS1	ensembl_havana	protein_coding	ENST00000233025:c.[121C>G]; ENST00000602728:c.[-81C>G]; ENST00000423431:c.[-30-478C>G]	ENSP00000233025:p.Pro41Ala	ENSP00000233025:p.Pro41Ala	ENST00000233025:c.121C>G	No	Yes
3	53275190	SNV	G	C	No	1		Heterozygous	7	410	1.70732	1	7	0	0	38.1429	7	410	5	5	0	2.16196e-05	0.0391833	No	1	130.57	TKT	protein_coding	TKT	ENSG00000163931	TKT	ensembl_havana	protein_coding	ENST00000472528:c.[*91C>G]; ENST00000462138:c.[297C>G]; ENST00000296289:c.[156C>G]; ENST00000423516:c.[297C>G]; ENST00000450814:c.[297C>G]; ENST00000469678:c.[297C>G]; ENST00000423525:c.[297C>G]	ENSP00000417773:p.[Asn99Lys]; ENSP00000296289:p.[Asn52Lys]; ENSP00000391481:p.[Asn99Lys]; ENSP00000413503:p.[Asn99Lys]; ENSP00000418340:p.[Asn99Lys]; ENSP00000405455:p.[Asn99Lys]	ENSP00000417773:p.Asn99Lys	ENST00000462138:c.297C>G	No	Yes
3	53899276	SNV	C	T	No	1		Homozygous	37	37	100	1	12	25	0.324324	37.6486	37	37	21	19		1	1	No	1	200	IL17RB	protein_coding	IL17RB	ENSG00000056736	IL17RB	ensembl_havana	protein_coding	ENST00000288167:c.1450C>T	ENSP00000288167:p.Gln484*	ENSP00000288167:p.Gln484*	ENST00000288167:c.1450C>T	No	Yes
3	56667682	SNV	G	C	No	1		Homozygous	13	13	100	1	6	7	0.461538	35.2308	13	13	10	10		1	1	No	1	200	FAM208A	protein_coding	FAM208A	ENSG00000163946	FAM208A	ensembl_havana	protein_coding	ENST00000431842:c.[1826C>G]; ENST00000355628:c.[2954C>G]; ENST00000493960:c.[3137C>G]	ENSP00000399410:p.[Thr609Arg]; ENSP00000347845:p.[Thr985Arg]; ENSP00000417509:p.[Thr1046Arg]	ENSP00000399410:p.Thr609Arg	ENST00000431842:c.1826C>G	No	Yes
3	58110191	SNV	C	T	No	1		Homozygous	15	15	100	1	6	9	0.4	38	15	15	9	9		1	1	No	1	200	FLNB	protein_coding	FLNB	ENSG00000136068	FLNB	ensembl_havana	protein_coding	ENST00000493452:c.[3350C>T]; ENST00000348383:c.[3857C>T]; ENST00000419752:c.[3350C>T]; ENST00000429972:c.[3857C>T]; ENST00000295956:c.[3857C>T]; ENST00000357272:c.[3857C>T]; ENST00000490882:c.[3857C>T]; ENST00000358537:c.[3857C>T]	ENSP00000418510:p.[Ala1117Val]; ENSP00000232447:p.[Ala1286Val]; ENSP00000414532:p.[Ala1117Val]; ENSP00000415599:p.[Ala1286Val]; ENSP00000295956:p.[Ala1286Val]; ENSP00000349819:p.[Ala1286Val]; ENSP00000420213:p.[Ala1286Val]; ENSP00000351339:p.[Ala1286Val]	ENSP00000349819:p.Ala1286Val	ENST00000357272:c.3857C>T	No	Yes
3	58302710	SNV	G	A	No	1		Heterozygous	10	12	83.3333	1	4	6	0.4	38.5	10	12	6	6	0	0.965237	0.992893	No	1	200	RPP14	protein_coding	RPP14	ENSG00000163684	RPP14	ensembl_havana	protein_coding	ENST00000445193:c.[308G>A]; ENST00000466547:c.[308G>A]; ENST00000295959:c.[308G>A]	ENSP00000412894:p.[Arg103Gln]; ENSP00000419909:p.[Arg103Gln]; ENSP00000295959:p.[Arg103Gln]	ENSP00000412894:p.Arg103Gln	ENST00000445193:c.308G>A	No	Yes
3	58303636	SNV	A	C	No	1		Homozygous	18	18	100	1	9	9	0.5	39.2222	18	18	13	12		1	1	No	1	200	RPP14, RPP14	protein_coding, protein_coding	RPP14, RPP14	ENSG00000163684, ENSG00000255154	RPP14, RPP14	ensembl_havana, havana	protein_coding, protein_coding	ENST00000445193:c.[*413A>C]; ENST00000528153:c.[296A>C]; ENST00000295959:c.[*413A>C]	ENSP00000437142:p.Lys99Thr		ENST00000445193:c.*413A>C	No	Yes
3	58503063	SNV	G	A	No	1		Homozygous	6	6	100	1	1	5	0.166667	38	6	6	5	5		1	1	No	1	200	ACOX2	protein_coding	ACOX2	ENSG00000168306	ACOX2	ensembl_havana	protein_coding	ENST00000302819:c.[1720C>T]; ENST00000459701:c.[1678C>T]; ENST00000460921:c.[52C>T]	ENSP00000307697:p.[Arg574Cys]; ENSP00000418562:p.[Arg560Cys]; ENSP00000417877:p.[Arg18Cys]	ENSP00000307697:p.Arg574Cys	ENST00000302819:c.1720C>T	No	Yes
3	66287056	SNV	G	A	No	1		Homozygous	22	22	100	1	14	8	0.363636	38.4545	22	22	14	14		1	1	No	1	200	SLC25A26	protein_coding	SLC25A26	ENSG00000144741	SLC25A26	ensembl_havana	protein_coding	ENST00000354883:c.[122G>A]; ENST00000536651:c.[34-6571G>A]; ENST00000464350:c.[-74-6571G>A]; ENST00000336733:c.[-74-6571G>A]	ENSP00000346955:p.Ser41Asn		ENST00000464350:c.-74-6571G>A	No	Yes
3	66419956	SNV	C	T	No	1		Homozygous	24	24	100	1	11	13	0.458333	37.9583	24	24	19	19		1	1	No	1	200	SLC25A26	protein_coding	SLC25A26	ENSG00000144741	SLC25A26	ensembl_havana	protein_coding	ENST00000464350:c.[*152C>T]; ENST00000354883:c.[623C>T]; ENST00000336733:c.[359C>T]; ENST00000413054:c.[359C>T]; ENST00000483224:c.[*243C>T]; ENST00000536651:c.[*454C>T]	ENSP00000346955:p.[Thr208Met]; ENSP00000336801:p.[Thr120Met]; ENSP00000415304:p.[Thr120Met]		ENST00000464350:c.*152C>T	No	Yes
3	66431280	SNV	C	T	No	1		Homozygous	31	31	100	1	11	20	0.354839	39.3871	31	31	17	18		1	1	No	1	200	SLC25A26, LRIG1	protein_coding, protein_coding	SLC25A26, LRIG1	ENSG00000144741, ENSG00000144749	SLC25A26, LRIG1	ensembl_havana, ensembl_havana	protein_coding, protein_coding	ENST00000464350:c.[*1450C>T]; ENST00000273261:c.[2776G>A]; ENST00000536651:c.[*1752C>T]; ENST00000383703:c.[2707G>A]	ENSP00000273261:p.[Gly926Ser]; ENSP00000373208:p.[Gly903Ser]	ENSP00000373208:p.Gly903Ser	ENST00000383703:c.2707G>A	No	Yes
3	66436546	SNV	C	T	No	1		Homozygous	15	15	100	1	10	5	0.333333	37.8	15	15	11	11		1	1	No	1	200	SLC25A26, LRIG1	protein_coding, protein_coding	SLC25A26, LRIG1	ENSG00000144741, ENSG00000144749	SLC25A26, LRIG1	ensembl_havana, ensembl_havana	protein_coding, protein_coding	ENST00000536651:c.[*1850-62C>T]; ENST00000464350:c.[*1548-62C>T]; ENST00000273261:c.[1648G>A]; ENST00000383703:c.[1720G>A]	ENSP00000273261:p.[Ala550Thr]; ENSP00000373208:p.[Ala574Thr]	ENSP00000373208:p.Ala574Thr	ENST00000383703:c.1720G>A	No	Yes
3	81643167	SNV	T	C	No	1		Homozygous	9	9	100	1	5	4	0.444444	37.4444	9	9	8	7		1	1	No	1	200	GBE1	protein_coding	GBE1	ENSG00000114480	GBE1	ensembl_havana	protein_coding	ENST00000429644:c.[1000A>G]; ENST00000489715:c.[877A>G]	ENSP00000410833:p.[Ile334Val]; ENSP00000419638:p.[Ile293Val]	ENSP00000410833:p.Ile334Val	ENST00000429644:c.1000A>G	No	Yes
3	97664725	SNV	C	T	No	1		Heterozygous	17	28	60.7143	1	9	8	0.470588	36.1176	17	28	9	9	0.94	0.997754	1	No	1	200	MINA	protein_coding	MINA	ENSG00000170854	MINA	ensembl_havana	protein_coding	ENST00000360258:c.[1153G>A]; ENST00000503097:c.[48G>A]; ENST00000394198:c.[1156G>A]; ENST00000333396:c.[1156G>A]	ENSP00000353395:p.[Ala385Thr]; ENSP00000377748:p.[Ala386Thr]; ENSP00000328251:p.[Ala386Thr]	ENSP00000328251:p.Ala386Thr	ENST00000333396:c.1156G>A	No	Yes
3	98304403	SNV	G	A	No	1		Heterozygous	13	23	56.5217	1	11	2	0.153846	37.8462	13	23	9	8	0	0.803006	0.743288	No	1	200	CPOX	protein_coding	CPOX	ENSG00000080819	CPOX	ensembl_havana	protein_coding	ENST00000264193:c.1054C>T	ENSP00000264193:p.Arg352Cys	ENSP00000264193:p.Arg352Cys	ENST00000264193:c.1054C>T	No	Yes
3	99886662	SNV	G	A	No	1		Heterozygous	23	68	33.8235	1	16	7	0.304348	36.7826	23	68	16	17	0.6	0.661922	0.967721	No	1	200	CMSS1	protein_coding	CMSS1	ENSG00000184220	CMSS1	ensembl_havana	protein_coding	ENST00000491299:c.[*495G>A]; ENST00000421999:c.[496G>A]; ENST00000478909:c.[364G>A]; ENST00000497345:c.[220G>A]; ENST00000489081:c.[442G>A]	ENSP00000410396:p.[Val166Ile]; ENSP00000417293:p.[Val122Ile]; ENSP00000418762:p.[Val74Ile]; ENSP00000419161:p.[Val148Ile]	ENSP00000410396:p.Val166Ile	ENST00000421999:c.496G>A	No	Yes
3	101283792	SNV	C	G	No	1		Heterozygous	26	37	70.2703	1	12	14	0.461538	38.6154	26	37	19	19	0	0.998938	1	No	1	200	TRMT10C	protein_coding	TRMT10C	ENSG00000174173	TRMT10C	ensembl_havana	protein_coding	ENST00000495642:c.[167C>G]; ENST00000309922:c.[167C>G]	ENSP00000419389:p.[Pro56Arg]; ENSP00000312356:p.[Pro56Arg]	ENSP00000312356:p.Pro56Arg	ENST00000309922:c.167C>G	No	Yes
3	105258861	SNV	A	G	No	1		Heterozygous	26	36	72.2222	1	13	13	0.5	37.8846	26	36	18	18	0.18	0.999229	0.997039	No	1	200	ALCAM	protein_coding	ALCAM	ENSG00000170017	ALCAM	ensembl_havana	protein_coding	ENST00000465413:c.[271+5172A>G]; ENST00000389927:c.[157+5172A>G]; ENST00000486979:c.[620A>G]; ENST00000472644:c.[773A>G]; ENST00000306107:c.[773A>G]	ENSP00000418213:p.[Asn207Ser]; ENSP00000419236:p.[Asn258Ser]; ENSP00000305988:p.[Asn258Ser]	ENSP00000305988:p.Asn258Ser	ENST00000306107:c.773A>G	No	Yes
3	105269001	SNV	T	G	No	1		Heterozygous	13	33	39.3939	1	13	0	0	17.9231	13	33	7	7	4.59	0.022883	0.0121793	No	1	109.065	ALCAM	protein_coding	ALCAM	ENSG00000170017	ALCAM	ensembl_havana	protein_coding	ENST00000306107:c.[1405T>G]; ENST00000389927:c.[571T>G]; ENST00000486979:c.[1252T>G]; ENST00000472644:c.[1405T>G]; ENST00000465413:c.[685T>G]	ENSP00000305988:p.[Tyr469Asp]; ENSP00000374577:p.[Tyr191Asp]; ENSP00000418213:p.[Tyr418Asp]; ENSP00000419236:p.[Tyr469Asp]; ENSP00000418937:p.[Tyr229Asp]	ENSP00000305988:p.Tyr469Asp	ENST00000306107:c.1405T>G	No	Yes
3	111828423	SNV	G	A	No	1		Homozygous	6	6	100	1	4	2	0.333333	38	6	6	6	6		1	1	No	1	200	C3orf52	protein_coding	C3orf52	ENSG00000114529	C3orf52	ensembl_havana	protein_coding	ENST00000484828:c.[366+6611G>A]; ENST00000480282:c.[396+6611G>A]; ENST00000431717:c.[396+6611G>A]; ENST00000264848:c.[430G>A]; ENST00000430855:c.[396+6611G>A]	ENSP00000264848:p.Gly144Ser	ENSP00000264848:p.Gly144Ser	ENST00000264848:c.430G>A	No	Yes
3	112718352	SNV	G	T	No	1		Heterozygous	27	36	75	1	18	9	0.333333	38.4444	27	36	12	11	1.6	0.977111	0.98316	No	1	200	GTPBP8	protein_coding	GTPBP8	ENSG00000163607	GTPBP8	ensembl_havana	protein_coding	ENST00000473129:c.[276G>T]; ENST00000295864:c.[*130G>T]; ENST00000485330:c.[627G>T]; ENST00000383677:c.[627G>T]; ENST00000488781:c.[*130G>T]; ENST00000467752:c.[393G>T]; ENST00000383678:c.[726G>T]	ENSP00000418514:p.[Gln92His]; ENSP00000418877:p.[Gln209His]; ENSP00000373175:p.[Gln209His]; ENSP00000417632:p.[Gln131His]; ENSP00000373176:p.[Gln242His]	ENSP00000373175:p.Gln209His	ENST00000383677:c.627G>T	No	Yes
3	112724619	SNV	A	G	No	1		Heterozygous	8	12	66.6667	1	5	3	0.375	39.375	8	12	8	8	0	0.990722	0.99975	No	1	200	GTPBP8, C3orf17	protein_coding, protein_coding	GTPBP8, C3orf17	ENSG00000163607, ENSG00000163608	GTPBP8, C3orf17	ensembl_havana, ensembl_havana	protein_coding, protein_coding	ENST00000393857:c.[1060T>C]; ENST00000485330:c.[*186+4667A>G]; ENST00000469809:c.[*572T>C]; ENST00000383675:c.[1258T>C]; ENST00000472637:c.[*1206T>C]; ENST00000472705:c.[*479T>C]; ENST00000469169:c.[*1160T>C]; ENST00000473284:c.[*1202T>C]; ENST00000314400:c.[1468T>C]; ENST00000462295:c.[*961T>C]; ENST00000489848:c.[*992T>C]	ENSP00000377438:p.[Ser354Pro]; ENSP00000373173:p.[Ser420Pro]; ENSP00000320251:p.[Ser490Pro]	ENSP00000320251:p.Ser490Pro	ENST00000314400:c.1468T>C	No	Yes
3	118945796	SNV	G	C	No	1		Heterozygous	10	34	29.4118	1	1	9	0.1	35	10	34	7	7	1.61	0.800128	0.672173	No	1	200	B4GALT4, B4GALT4-AS1	protein_coding, antisense	B4GALT4, B4GALT4-AS1	ENSG00000121578, ENSG00000240254	B4GALT4, B4GALT4-AS1	ensembl_havana, havana	protein_coding, antisense	ENST00000467604:c.[346C>G]; ENST00000491906:c.[-66C>G]; ENST00000483209:c.[346C>G]; ENST00000471675:c.[165+40C>G]; ENST00000480814:c.[346C>G]; ENST00000475803:c.[346C>G]; ENST00000479150:c.[346C>G]; ENST00000393765:c.[346C>G]; ENST00000359213:c.[346C>G]	ENSP00000417226:p.[Gln116Glu]; ENSP00000420161:p.[Gln116Glu]; ENSP00000420665:p.[Gln116Glu]; ENSP00000417188:p.[Gln116Glu]; ENSP00000417958:p.[Gln116Glu]; ENSP00000377360:p.[Gln116Glu]; ENSP00000352144:p.[Gln116Glu]	ENSP00000417226:p.Gln116Glu	ENST00000467604:c.346C>G	No	Yes
3	121500699	SNV	C	T	No	1		Heterozygous	11	38	28.9474	1	6	5	0.454545	36.1818	11	38	8	8	0	0.788507	0.99768	No	1	200	IQCB1	protein_coding	IQCB1	ENSG00000173226	IQCB1	ensembl_havana	protein_coding	ENST00000393650:c.[*279G>A]; ENST00000310864:c.[1301G>A]; ENST00000349820:c.[902G>A]	ENSP00000311505:p.[Cys434Tyr]; ENSP00000323756:p.[Cys301Tyr]	ENSP00000311505:p.Cys434Tyr	ENST00000310864:c.1301G>A	No	Yes
3	121507231	SNV	A	T	No	1		Heterozygous	34	44	77.2727	1	24	10	0.294118	37.2647	34	44	22	19	0	0.999494	1	No	1	200	IQCB1	protein_coding	IQCB1	ENSG00000173226	IQCB1	ensembl_havana	protein_coding	ENST00000310864:c.[1178T>A]; ENST00000349820:c.[779T>A]; ENST00000393650:c.[*156T>A]	ENSP00000311505:p.[Ile393Asn]; ENSP00000323756:p.[Ile260Asn]	ENSP00000311505:p.Ile393Asn	ENST00000310864:c.1178T>A	No	Yes
3	122081856	SNV	C	A	No	1		Heterozygous	18	58	31.0345	1	8	10	0.444444	38.7222	18	58	13	12	0	0.440243	0.833969	No	1	200	CCDC58	protein_coding	CCDC58	ENSG00000160124	CCDC58	ensembl_havana	protein_coding	ENST00000479414:c.[331G>T]; ENST00000497726:c.[70G>T]; ENST00000291458:c.[343G>T]; ENST00000479899:c.[301G>T]	ENSP00000418810:p.[Glu111*]; ENSP00000420769:p.[Glu24*]; ENSP00000291458:p.[Glu115*]; ENSP00000420248:p.[Glu101*]	ENSP00000291458:p.Glu115*	ENST00000291458:c.343G>T	No	Yes
3	122186188	SNV	C	T	No	1		Homozygous	25	25	100	1	9	16	0.36	38.2	25	25	13	13		1	1	No	1	200	KPNA1	protein_coding	KPNA1	ENSG00000114030	KPNA1	ensembl_havana	protein_coding	ENST00000476916:c.[218G>A]; ENST00000494339:c.[218G>A]; ENST00000485027:c.[218G>A]; ENST00000493510:c.[218G>A]; ENST00000344337:c.[218G>A]; ENST00000482287:c.[218G>A]; ENST00000465882:c.[218G>A]	ENSP00000417319:p.[Ser73Asn]; ENSP00000418394:p.[Ser73Asn]; ENSP00000420013:p.[Ser73Asn]; ENSP00000419257:p.[Ser73Asn]; ENSP00000343701:p.[Ser73Asn]; ENSP00000417166:p.[Ser73Asn]; ENSP00000419890:p.[Ser73Asn]	ENSP00000343701:p.Ser73Asn	ENST00000344337:c.218G>A	No	Yes
3	123665902	SNV	T	G	No	1		Heterozygous	14	20	70	1	7	7	0.5	39.2143	14	20	11	11	0	0.972917	0.999371	No	1	200	CCDC14	protein_coding	CCDC14	ENSG00000175455	CCDC14	ensembl_havana	protein_coding	ENST00000419247:c.[268+225A>C]; ENST00000310351:c.[613A>C]; ENST00000426152:c.[271A>C]; ENST00000409657:c.[*833A>C]; ENST00000435910:c.[*710A>C]; ENST00000489746:c.[493A>C]; ENST00000485727:c.[493A>C]; ENST00000409697:c.[1036A>C]; ENST00000433542:c.[970A>C]; ENST00000488653:c.[1093A>C]	ENSP00000312031:p.[Thr205Pro]; ENSP00000414655:p.[Thr91Pro]; ENSP00000418403:p.[Thr165Pro]; ENSP00000418002:p.[Thr165Pro]; ENSP00000386866:p.[Thr346Pro]; ENSP00000395706:p.[Thr324Pro]; ENSP00000420180:p.[Thr365Pro]	ENSP00000418002:p.Thr165Pro	ENST00000485727:c.493A>C	No	Yes
3	124462824	SNV	A	G	No	1		Heterozygous	35	92	38.0435	1	8	27	0.228571	37.7714	35	92	18	18	0.9	0.42112	0.927008	No	1	200	UMPS	protein_coding	UMPS	ENSG00000114491	UMPS	ensembl_havana	protein_coding	ENST00000479719:c.[*511A>G]; ENST00000232607:c.[1336A>G]; ENST00000462091:c.[*1008A>G]; ENST00000460034:c.[*1080A>G]; ENST00000538242:c.[802A>G]; ENST00000536109:c.[1060A>G]; ENST00000413078:c.[511A>G]; ENST00000497791:c.[*717A>G]; ENST00000467167:c.[*1234A>G]; ENST00000474588:c.[*560A>G]	ENSP00000232607:p.[Ile446Val]; ENSP00000444988:p.[Ile268Val]; ENSP00000443577:p.[Ile354Val]; ENSP00000397965:p.[Ile171Val]	ENSP00000232607:p.Ile446Val	ENST00000232607:c.1336A>G	No	Yes
3	124482473^124482474	Insertion	-	A	No	1		Heterozygous	10	119	8.40336	1	7	3	0.3	36.2	10	119	6	6	0	0.156941	0.998672	No	1	200	ITGB5	protein_coding	ITGB5	ENSG00000082781	ITGB5	ensembl_havana	protein_coding	ENST00000296181:c.2396_2397insT	ENSP00000296181:p.*800fs	ENSP00000296181:p.*800fs	ENST00000296181:c.2396_2397insT	No	Yes
3	124515498	SNV	T	C	No	1		Heterozygous	28	78	35.8974	1	21	7	0.25	37.0357	28	78	19	20	0	0.848326	0.790322	No	1	200	ITGB5	protein_coding	ITGB5	ENSG00000082781	ITGB5	ensembl_havana	protein_coding	ENST00000296181:c.[1430A>G]; ENST00000481591:c.[497A>G]; ENST00000496703:c.[728A>G]; ENST00000488466:c.[614A>G]	ENSP00000296181:p.[Asn477Ser]; ENSP00000420814:p.[Asn166Ser]; ENSP00000418367:p.[Asn243Ser]; ENSP00000477446:p.[Asn205Ser]	ENSP00000296181:p.Asn477Ser	ENST00000296181:c.1430A>G	No	Yes
3	124515646	SNV	A	C	No	1		Heterozygous	31	100	31	1	9	22	0.290323	38.6452	31	100	17	15	0	0.894294	1	No	1	200	ITGB5	protein_coding	ITGB5	ENSG00000082781	ITGB5	ensembl_havana	protein_coding	ENST00000496703:c.[580T>G]; ENST00000488466:c.[466T>G]; ENST00000481591:c.[349T>G]; ENST00000296181:c.[1282T>G]	ENSP00000418367:p.[Leu194Val]; ENSP00000477446:p.[Leu156Val]; ENSP00000420814:p.[Leu117Val]; ENSP00000296181:p.[Leu428Val]	ENSP00000296181:p.Leu428Val	ENST00000296181:c.1282T>G	No	Yes
3	125786879	SNV	T	C	No	1		Homozygous	29	29	100	1	16	13	0.448276	34.8966	29	29	16	16		1	1	No	1	200	SLC41A3	protein_coding	SLC41A3	ENSG00000114544	SLC41A3	ensembl_havana	protein_coding	ENST00000315891:c.[184A>G]; ENST00000507280:c.[184A>G]; ENST00000346785:c.[184A>G]; ENST00000514333:c.[184A>G]; ENST00000507008:c.[-78-16986A>G]; ENST00000504035:c.[184A>G]; ENST00000505996:c.[184A>G]; ENST00000512470:c.[184A>G]; ENST00000509064:c.[184A>G]; ENST00000510651:c.[184A>G]; ENST00000509452:c.[184A>G]; ENST00000508835:c.[-78-16986A>G]; ENST00000514677:c.[184A>G]; ENST00000514891:c.[184A…	ENSP00000326070:p.[Thr62Ala]; ENSP00000422531:p.[Thr62Ala]; ENSP00000264471:p.[Thr62Ala]; ENSP00000422458:p.[Thr62Ala]; ENSP00000421940:p.[Thr62Ala]; ENSP00000427254:p.[Thr62Ala]; ENSP00000421008:p.[Thr62Ala]; ENSP00000424882:p.[Thr62Ala]; ENSP00000423524:p.[Thr62Ala]; ENSP00000422150:p.[Thr62Ala]; ENSP00000422828:p.[Thr62Ala]; ENSP00000423154:p.[Thr62Ala]; ENSP00000353533:p.[Thr62Ala]; ENSP00000…	ENSP00000353533:p.Thr62Ala	ENST00000360370:c.184A>G	No	Yes
3	126451937	SNV	G	T	No	1		Heterozygous	7	37	18.9189	1	2	5	0.285714	39.4286	7	37	5	5	0	0.90625	0.670991	No	1	200	CHCHD6	protein_coding	CHCHD6	ENSG00000159685	CHCHD6	ensembl_havana	protein_coding	ENST00000290913:c.[283G>T]; ENST00000508789:c.[283G>T]; ENST00000513253:c.[82G>T]; ENST00000503119:c.[283G>T]	ENSP00000290913:p.[Ala95Ser]; ENSP00000422912:p.[Ala95Ser]; ENSP00000422787:p.[Ala28Ser]; ENSP00000427517:p.[Ala95Ser]	ENSP00000422912:p.Ala95Ser	ENST00000508789:c.283G>T	No	Yes
3	128890080	SNV	G	A	No	1		Heterozygous	11	590	1.86441	1	0	11	0	37	11	590	4	4	0.77	1.76473e-06	0.0433709	No	1	156.536	CNBP	protein_coding	CNBP	ENSG00000169714	CNBP	ensembl_havana	protein_coding	ENST00000500450:c.[207C>T]; ENST00000502976:c.[237C>T]; ENST00000422453:c.[258C>T]; ENST00000512338:c.[272C>T]; ENST00000504813:c.[228C>T]; ENST00000441626:c.[264C>T]; ENST00000446936:c.[243C>T]; ENST00000451728:c.[261C>T]	ENSP00000424787:p.[Thr91Ile]		ENST00000422453:c.258C>T	No	Yes
3	128976451	SNV	C	G	No	1		Heterozygous	14	48	29.1667	1	7	7	0.5	38.2857	14	48	10	10	0	0.844441	1	No	1	200	COPG1	protein_coding	COPG1	ENSG00000181789	COPG1	ensembl_havana	protein_coding	ENST00000314797:c.718C>G	ENSP00000325002:p.Leu240Val	ENSP00000325002:p.Leu240Val	ENST00000314797:c.718C>G	No	Yes
3	132218623	SNV	G	T	No	1		Homozygous	22	22	100	1	9	13	0.409091	37.2727	22	22	13	13		1	1	No	1	200	DNAJC13	protein_coding	DNAJC13	ENSG00000138246	DNAJC13	ensembl_havana	protein_coding	ENST00000260818:c.4387G>T	ENSP00000260818:p.Ala1463Ser	ENSP00000260818:p.Ala1463Ser	ENST00000260818:c.4387G>T	No	Yes
3	133341988	SNV	T	C	No	1		Heterozygous	12	27	44.4444	1	11	1	0.0833333	39	12	27	9	9	0	0.619422	0.57989	No	1	200	TOPBP1	protein_coding	TOPBP1	ENSG00000163781	TOPBP1	ensembl_havana	protein_coding	ENST00000260810:c.3125A>G	ENSP00000260810:p.Asn1042Ser	ENSP00000260810:p.Asn1042Ser	ENST00000260810:c.3125A>G	No	Yes
3	133368362	SNV	T	G	No	1		Homozygous	14	14	100	1	4	10	0.285714	38.1429	14	14	9	8		1	1	No	1	200	TOPBP1	protein_coding	TOPBP1	ENSG00000163781	TOPBP1	ensembl_havana	protein_coding	ENST00000260810:c.1369A>C	ENSP00000260810:p.Lys457Gln	ENSP00000260810:p.Lys457Gln	ENST00000260810:c.1369A>C	No	Yes
3	133524717	SNV	G	C	No	1		Heterozygous	69	99	69.697	1	69	0	0	35.7536	69	99	20	20	1.27	0.999297	1	No	1	200	SRPRB	protein_coding	SRPRB	ENSG00000144867	SRPRB	ensembl_havana	protein_coding	ENST00000484684:c.[25G>C]; ENST00000466490:c.[25G>C]	ENSP00000417096:p.[Val9Leu]; ENSP00000418401:p.[Val9Leu]	ENSP00000418401:p.Val9Leu	ENST00000466490:c.25G>C	No	Yes
3	133941320	SNV	C	T	No	1		Heterozygous	10	33	30.303	1	2	8	0.2	39.6	10	33	9	9	0	0.952226	0.961173	No	1	200	RYK	protein_coding	RYK	ENSG00000163785	RYK	ensembl_havana	protein_coding	ENST00000427044:c.[-281G>A]; ENST00000296084:c.[290G>A]; ENST00000460933:c.[233G>A]	ENSP00000296084:p.[Ser97Asn]; ENSP00000419122:p.[Ser78Asn]		ENST00000427044:c.-281G>A	No	Yes
3	134077470	SNV	C	G	No	1		Heterozygous	11	37	29.7297	1	2	9	0.181818	33.5455	11	37	7	7	0	0.667909	0.544751	No	1	200	AMOTL2	protein_coding	AMOTL2	ENSG00000114019	AMOTL2	ensembl_havana	protein_coding	ENST00000249883:c.[2196G>C]; ENST00000514516:c.[2367G>C]; ENST00000513145:c.[2187G>C]; ENST00000422605:c.[2193G>C]	ENSP00000249883:p.[Glu732Asp]; ENSP00000424765:p.[Glu789Asp]; ENSP00000425475:p.[Glu729Asp]; ENSP00000409999:p.[Glu731Asp]	ENSP00000424765:p.Glu789Asp	ENST00000514516:c.2367G>C	No	Yes
3	137988957	SNV	G	A	No	1		Heterozygous	6	15	40	1	1	5	0.166667	39	6	15	2	2	0	0.19551	0.556051	No	1	200	ARMC8, NME9	protein_coding, protein_coding	ARMC8, NME9	ENSG00000114098, ENSG00000181322	ARMC8, NME9	ensembl_havana, ensembl_havana	protein_coding, protein_coding	ENST00000461822:c.[1261G>A]; ENST00000469044:c.[1462G>A]; ENST00000393058:c.[1432G>A]; ENST00000481646:c.[1420G>A]; ENST00000538260:c.[1369G>A]; ENST00000484930:c.[740-7529C>T]; ENST00000536478:c.[746-7529C>T]; ENST00000341790:c.[740-7529C>T]; ENST00000383180:c.[746-7529C>T]; ENST00000485396:c.[1243G>A]; ENST00000492993:c.[*66-7529C>T]; ENST00000317876:c.[746-7529C>T]; ENST00000491704:c.[1336G>A]	ENSP00000420706:p.[Gly421Arg]; ENSP00000419413:p.[Gly488Arg]; ENSP00000376778:p.[Gly478Arg]; ENSP00000420333:p.[Gly474Arg]; ENSP00000441592:p.[Gly457Arg]; ENSP00000417049:p.[Gly415Arg]; ENSP00000417304:p.[Gly446Arg]	ENSP00000419413:p.Gly488Arg	ENST00000469044:c.1462G>A	No	Yes
3	139258508	SNV	G	A	No	1		Heterozygous	31	72	43.0556	1	1	30	0.0322581	37.871	31	72	13	13	0	0.412369	0.730542	No	1	200	RP11-319G6.1, RBP1	antisense, protein_coding	RP11-319G6.1, RBP1	ENSG00000248932, ENSG00000114115	RP11-319G6.1, RBP1	havana, ensembl_havana	antisense, protein_coding	ENST00000232219:c.[53C>T]; ENST00000483943:c.[53C>T]; ENST00000487424:c.[23C>T]; ENST00000492918:c.[53C>T]	ENSP00000232219:p.[Pro18Leu]; ENSP00000424813:p.[Pro18Leu]; ENSP00000427492:p.[Pro8Leu]; ENSP00000429166:p.[Pro18Leu]	ENSP00000424813:p.Pro18Leu	ENST00000483943:c.53C>T	No	Yes
3	141640893^141640894	Insertion	-	A	No	1		Heterozygous	18	312	5.76923	1	9	9	0.5	39.0556	18	312	9	9	0	0.48252	0.957073	Yes	6	200	ATP1B3	protein_coding	ATP1B3	ENSG00000069849	ATP1B3	ensembl_havana	protein_coding	ENST00000465172:c.[*634_*635insA]; ENST00000462082:c.[100-3480_100-3479insA]; ENST00000539728:c.[*53_*54insA]; ENST00000487199:c.[*127_*128insA]; ENST00000286371:c.[657_658insA]; ENST00000466678:c.[*614_*615insA]	ENSP00000286371:p.Leu222fs		ENST00000465172:c.*634_*635insA	Yes	Yes
3	149468530	SNV	T	G	No	1		Heterozygous	37	63	58.7302	1	16	21	0.432432	36.9189	37	63	22	22	0	0.967913	0.988007	No	1	200	COMMD2	protein_coding	COMMD2	ENSG00000114744	COMMD2	ensembl_havana	protein_coding	ENST00000491617:c.[337A>C]; ENST00000483708:c.[*51A>C]; ENST00000473414:c.[337A>C]	ENSP00000417962:p.[Ile113Leu]; ENSP00000419475:p.[Ile113Leu]	ENSP00000419475:p.Ile113Leu	ENST00000473414:c.337A>C	No	Yes
3	150299509^150299510	Insertion	-	A	No	1		Heterozygous	9	91	9.89011	1	5	4	0.444444	37.8889	9	91	5	5	0	0.437416	0.954879	Yes	7	200	SERP1, EIF2A	protein_coding, protein_coding	SERP1, EIF2A	ENSG00000120742, ENSG00000144895	SERP1, EIF2A	ensembl_havana, ensembl_havana	protein_coding, protein_coding	ENST00000406576:c.[1419_1420insA]; ENST00000477551:c.[*944_*945insA]; ENST00000460851:c.[1602_1603insA]; ENST00000273435:c.[1587_1588insA]; ENST00000465535:c.[817-1478_817-1477insA]; ENST00000383043:c.[960_961insA]; ENST00000487799:c.[1527_1528insA]; ENST00000479209:c.[-1043+21221_-1043+21222insT]	ENSP00000385292:p.[Ile476fs]; ENSP00000417229:p.[Ile537fs]; ENSP00000273435:p.[Ile532fs]; ENSP00000372513:p.[Ile323fs]; ENSP00000420537:p.[Ile512fs]		ENST00000479209:c.-1043+21221_-1043+21222insT	No	Yes
3	158320703	SNV	C	A	No	1		Heterozygous	23	43	53.4884	1	14	9	0.391304	36.4783	23	43	11	12	0.22	0.987849	1	No	1	200	MLF1	protein_coding	MLF1	ENSG00000178053	MLF1	ensembl_havana	protein_coding	ENST00000482628:c.[601C>A]; ENST00000392822:c.[769C>A]; ENST00000498592:c.[541C>A]; ENST00000469452:c.[472C>A]; ENST00000359117:c.[601C>A]; ENST00000478894:c.[646C>A]; ENST00000484955:c.[601C>A]; ENST00000471745:c.[646C>A]; ENST00000355893:c.[676C>A]; ENST00000491767:c.[454C>A]	ENSP00000417141:p.[Pro201Thr]; ENSP00000376568:p.[Pro257Thr]; ENSP00000419636:p.[Pro181Thr]; ENSP00000418595:p.[Pro158Thr]; ENSP00000352025:p.[Pro201Thr]; ENSP00000417777:p.[Pro216Thr]; ENSP00000417835:p.[Pro201Thr]; ENSP00000420134:p.[Pro216Thr]; ENSP00000348157:p.[Pro226Thr]; ENSP00000420410:p.[Pro152Thr]	ENSP00000352025:p.Pro201Thr	ENST00000359117:c.601C>A	No	Yes
3	158366900	SNV	G	A	No	1		Homozygous	16	16	100	1	8	8	0.5	37.625	16	16	12	12		1	1	No	1	200	GFM1, LXN	protein_coding, protein_coding	GFM1, LXN	ENSG00000168827, ENSG00000079257	GFM1, LXN	ensembl_havana, ensembl_havana	protein_coding, protein_coding	ENST00000478576:c.[643G>A]; ENST00000486715:c.[643G>A]; ENST00000478254:c.[643G>A]; ENST00000482640:c.[361-2902C>T]; ENST00000264263:c.[643G>A]	ENSP00000418755:p.[Val215Ile]; ENSP00000419038:p.[Val215Ile]; ENSP00000417225:p.[Val215Ile]; ENSP00000264263:p.[Val215Ile]	ENSP00000419038:p.Val215Ile	ENST00000486715:c.643G>A	No	Yes
3	158388780	SNV	T	C	No	1		Homozygous	103	103	100	1	34	69	0.330097	37.6893	103	103	37	37		1	1	No	1	200	GFM1, LXN	protein_coding, protein_coding	GFM1, LXN	ENSG00000168827, ENSG00000079257	GFM1, LXN	ensembl_havana, ensembl_havana	protein_coding, protein_coding	ENST00000478576:c.[1601+4605T>C]; ENST00000264265:c.[158A>G]; ENST00000264263:c.[1658+4605T>C]; ENST00000486715:c.[1601+4605T>C]; ENST00000478254:c.[*241+4605T>C]	ENSP00000264265:p.His53Arg		ENST00000486715:c.1601+4605T>C	No	Yes
3	158422578	SNV	A	T	No	1		Heterozygous	7	66	10.6061	1	4	3	0.428571	37	7	66	5	5	0	0.216015	0.316461	No	1	200	RARRES1	protein_coding	RARRES1	ENSG00000118849	RARRES1	ensembl_havana	protein_coding	ENST00000237696:c.[672+2T>A]; ENST00000479756:c.[674T>A]	ENSP00000418556:p.Val225Glu		ENST00000237696:c.672+2T>A	No	Yes
3	158449977	Deletion	C	-	No	1		Heterozygous	12	278	4.31655	1	0	12	0	22.25	12	278	2	1	4.05	0.0145493	0.1496	No	1	200	RARRES1	protein_coding	RARRES1	ENSG00000118849	RARRES1	ensembl_havana	protein_coding	ENST00000237696:c.[228delG]; ENST00000479756:c.[228delG]	ENSP00000237696:p.[Ser78fs]; ENSP00000418556:p.[Ser78fs]	ENSP00000237696:p.Ser78fs	ENST00000237696:c.228delG	No	Yes
3	158520011	SNV	C	T	No	1		Heterozygous	8	14	57.1429	1	5	3	0.375	35.5	8	14	7	7	0	0.940284	0.822558	No	1	200	MFSD1	protein_coding	MFSD1	ENSG00000118855	MFSD1	ensembl_havana	protein_coding	ENST00000486568:c.[116-2097C>T]; ENST00000471500:c.[67C>T]; ENST00000491804:c.[203-2097C>T]; ENST00000484166:c.[70C>T]; ENST00000471266:c.[70C>T]; ENST00000480292:c.[70C>T]; ENST00000465739:c.[-56-2097C>T]; ENST00000264266:c.[70C>T]; ENST00000392813:c.[217C>T]; ENST00000415822:c.[217C>T]	ENSP00000420816:p.[Pro23Ser]; ENSP00000417950:p.[Pro24Ser]; ENSP00000419281:p.[Pro24Ser]; ENSP00000419467:p.[Pro24Ser]; ENSP00000264266:p.[Pro24Ser]; ENSP00000376560:p.[Pro73Ser]; ENSP00000403117:p.[Pro73Ser]	ENSP00000403117:p.Pro73Ser	ENST00000415822:c.217C>T	No	Yes
3	158537443	SNV	A	G	No	1		Heterozygous	25	40	62.5	1	13	12	0.48	35.76	25	40	17	17	0	0.999505	1	No	1	200	MFSD1	protein_coding	MFSD1	ENSG00000118855	MFSD1	ensembl_havana	protein_coding	ENST00000392813:c.[688A>G]; ENST00000471500:c.[*429A>G]; ENST00000484166:c.[*308A>G]; ENST00000415822:c.[805A>G]; ENST00000264266:c.[658A>G]; ENST00000477743:c.[160A>G]; ENST00000480292:c.[*308A>G]	ENSP00000376560:p.[Ile230Val]; ENSP00000403117:p.[Ile269Val]; ENSP00000264266:p.[Ile220Val]; ENSP00000417163:p.[Ile54Val]	ENSP00000403117:p.Ile269Val	ENST00000415822:c.805A>G	No	Yes
3	160143970	SNV	G	A	No	1		Heterozygous	32	114	28.0702	1	21	11	0.34375	37.6562	32	114	19	18	0	0.983822	0.999945	No	1	200	RP11-432B6.3, SMC4	protein_coding, protein_coding	RP11-432B6.3, SMC4	ENSG00000248710, ENSG00000113810	RP11-432B6.3, SMC4	havana, ensembl_havana	protein_coding, protein_coding	ENST00000344722:c.[2587G>A]; ENST00000360111:c.[2587G>A]; ENST00000483754:c.[952+12050C>T]; ENST00000462787:c.[2587G>A]; ENST00000357388:c.[2587G>A]; ENST00000469762:c.[2512G>A]	ENSP00000341382:p.[Val863Ile]; ENSP00000353225:p.[Val863Ile]; ENSP00000420734:p.[Val863Ile]; ENSP00000349961:p.[Val863Ile]; ENSP00000417964:p.[Val838Ile]	ENSP00000349961:p.Val863Ile	ENST00000357388:c.2587G>A	No	Yes
3	170078232	SNV	C	T	No	1		Homozygous	9	9	100	1	7	2	0.222222	33.5556	9	9	6	6		1	1	No	1	200	SKIL	protein_coding	SKIL	ENSG00000136603	SKIL	ensembl_havana	protein_coding	ENST00000426052:c.[53C>T]; ENST00000476188:c.[113C>T]; ENST00000259119:c.[113C>T]; ENST00000458537:c.[113C>T]; ENST00000413427:c.[113C>T]	ENSP00000406520:p.[Ala18Val]; ENSP00000417670:p.[Ala38Val]; ENSP00000259119:p.[Ala38Val]; ENSP00000415243:p.[Ala38Val]; ENSP00000400193:p.[Ala38Val]	ENSP00000415243:p.Ala38Val	ENST00000458537:c.113C>T	No	Yes
3	172365832	SNV	T	G	No	1		Heterozygous	8	10	80	1	4	4	0.5	37.625	8	10	5	5	0.17	0.715247	0.976665	No	1	200	NCEH1	protein_coding	NCEH1	ENSG00000144959	NCEH1	ensembl_havana	protein_coding	ENST00000273512:c.[307A>C]; ENST00000424772:c.[277A>C]; ENST00000475381:c.[211A>C]; ENST00000543711:c.[-32-2350A>C]; ENST00000421723:c.[235-2350A>C]; ENST00000538775:c.[307A>C]	ENSP00000273512:p.[Lys103Gln]; ENSP00000392934:p.[Lys93Gln]; ENSP00000418571:p.[Lys71Gln]; ENSP00000442464:p.[Lys103Gln]	ENSP00000418571:p.Lys71Gln	ENST00000475381:c.211A>C	No	Yes
3	179096508	SNV	C	G	No	1		Homozygous	17	17	100	1	8	9	0.470588	35.7059	17	17	12	12		1	1	No	1	200	MFN1	protein_coding	MFN1	ENSG00000171109	MFN1	ensembl_havana	protein_coding	ENST00000474903:c.[918+1272C>G]; ENST00000263969:c.[1568C>G]; ENST00000357390:c.[*328C>G]; ENST00000280653:c.[1329+1272C>G]; ENST00000471841:c.[1568C>G]	ENSP00000263969:p.[Pro523Arg]; ENSP00000420617:p.[Pro523Arg]	ENSP00000420617:p.Pro523Arg	ENST00000471841:c.1568C>G	No	Yes
3	179320578^179320579	Insertion	-	A	No	1		Heterozygous	9	58	15.5172	1	6	3	0.333333	40.3333	9	58	4	5	0	0.00481867	0.0616791	Yes	6	200	MRPL47	protein_coding	MRPL47	ENSG00000136522	MRPL47	ensembl_havana	protein_coding	ENST00000476781:c.[105_106insT]; ENST00000259038:c.[99-54_99-53insT]; ENST00000392659:c.[-86-1001_-86-1000insT]	ENSP00000417602:p.Leu36fs	ENSP00000417602:p.Leu36fs	ENST00000476781:c.105_106insT	No	Yes
3	183558402	SNV	C	G	No	1		Homozygous	54	54	100	1	27	27	0.5	39.0556	54	54	31	31		1	1	No	1	200	PARL	protein_coding	PARL	ENSG00000175193	PARL	ensembl_havana	protein_coding	ENST00000418450:c.[82G>C]; ENST00000450375:c.[124G>C]; ENST00000311101:c.[634G>C]; ENST00000449306:c.[373G>C]; ENST00000317096:c.[784G>C]; ENST00000417784:c.[157G>C]; ENST00000421484:c.[*318G>C]; ENST00000435888:c.[634G>C]	ENSP00000392926:p.[Val28Leu]; ENSP00000402689:p.[Val42Leu]; ENSP00000310676:p.[Val212Leu]; ENSP00000396691:p.[Val125Leu]; ENSP00000325421:p.[Val262Leu]; ENSP00000398043:p.[Val53Leu]; ENSP00000402137:p.[Val212Leu]	ENSP00000325421:p.Val262Leu	ENST00000317096:c.784G>C	No	Yes
3	183861243	SNV	A	G	No	1		Homozygous	67	67	100	1	41	26	0.38806	39	67	67	28	29		1	1	No	1	200	EIF2B5	protein_coding	EIF2B5	ENSG00000145191	EIF2B5	ensembl_havana	protein_coding	ENST00000273783:c.[1759A>G]; ENST00000444495:c.[1759A>G]	ENSP00000273783:p.[Ile587Val]; ENSP00000409142:p.[Ile587Val]	ENSP00000273783:p.Ile587Val	ENST00000273783:c.1759A>G	No	Yes
3	183975365	SNV	C	T	No	1		Homozygous	31	31	100	1	24	7	0.225806	33.4839	31	31	20	20		1	1	No	1	200	EIF2B5, ECE2	protein_coding, protein_coding	EIF2B5, ECE2	ENSG00000145191, ENSG00000145194	EIF2B5, ECE2	ensembl_havana, ensembl_havana	protein_coding, protein_coding	ENST00000324557:c.[301C>T]; ENST00000402825:c.[301C>T]; ENST00000444495:c.[2106+112870C>T]	ENSP00000314295:p.[His101Tyr]; ENSP00000384223:p.[His101Tyr]	ENSP00000384223:p.His101Tyr	ENST00000402825:c.301C>T	No	Yes
3	183976241	SNV	A	G	No	1		Heterozygous	47	50	94	1	20	27	0.425532	36.0638	47	50	21	21		0.999839	1	No	1	200	EIF2B5, ECE2	protein_coding, protein_coding	EIF2B5, ECE2	ENSG00000145191, ENSG00000145194	EIF2B5, ECE2	ensembl_havana, ensembl_havana	protein_coding, protein_coding	ENST00000444495:c.[2106+113746A>G]; ENST00000402825:c.[480+697A>G]; ENST00000324557:c.[646A>G]	ENSP00000314295:p.Lys216Glu		ENST00000402825:c.480+697A>G	No	Yes
3	184037533	SNV	A	G	No	1		Heterozygous	35	38	92.1053	1	30	5	0.142857	33.6571	35	38	16	16		0.96443	1	No	1	200	EIF2B5, EIF4G1	protein_coding, protein_coding	EIF2B5, EIF4G1	ENSG00000145191, ENSG00000114867	EIF2B5, EIF4G1	ensembl_havana, ensembl_havana	protein_coding, protein_coding	ENST00000426123:c.[304A>G]; ENST00000427845:c.[220A>G]; ENST00000342981:c.[481A>G]; ENST00000414031:c.[361A>G]; ENST00000352767:c.[502A>G]; ENST00000319274:c.[481A>G]; ENST00000392537:c.[220A>G]; ENST00000444495:c.[2106+175038A>G]; ENST00000424196:c.[502A>G]; ENST00000413967:c.[204A>G]; ENST00000450424:c.[481A>G]; ENST00000427141:c.[220A>G]; ENST00000421110:c.[502A>G]; ENST00000444861:c.[-12A>G];…	ENSP00000403269:p.[Thr102Ala]; ENSP00000407682:p.[Thr74Ala]; ENSP00000343450:p.[Thr161Ala]; ENSP00000391935:p.[Thr121Ala]; ENSP00000338020:p.[Thr168Ala]; ENSP00000323737:p.[Thr161Ala]; ENSP00000376320:p.[Thr74Ala]; ENSP00000416255:p.[Thr168Ala]; ENSP00000391412:p.[Thr161Ala]; ENSP00000411214:p.[Thr74Ala]; ENSP00000413159:p.[Thr168Ala]; ENSP00000395974:p.[Thr121Ala]; ENSP00000415943:p.[Thr111Ala];…	ENSP00000343450:p.Thr161Ala	ENST00000342981:c.481A>G	No	Yes
3	184039666	SNV	A	G	No	1		Homozygous	62	62	100	1	37	25	0.403226	35.7581	62	62	26	26		1	1	No	1	200	EIF2B5, EIF4G1	protein_coding, protein_coding	EIF2B5, EIF4G1	ENSG00000145191, ENSG00000114867	EIF2B5, EIF4G1	ensembl_havana, ensembl_havana	protein_coding, protein_coding	ENST00000444861:c.[802A>G]; ENST00000434061:c.[706A>G]; ENST00000450424:c.[1294A>G]; ENST00000426123:c.[1117A>G]; ENST00000411531:c.[1174A>G]; ENST00000435046:c.[706A>G]; ENST00000414031:c.[1174A>G]; ENST00000319274:c.[1294A>G]; ENST00000392537:c.[1033A>G]; ENST00000444495:c.[2106+177171A>G]; ENST00000352767:c.[1315A>G]; ENST00000342981:c.[1294A>G]; ENST00000382330:c.[1315A>G]; ENST00000421110:c.…	ENSP00000398145:p.[Met268Val]; ENSP00000411826:p.[Met236Val]; ENSP00000391412:p.[Met432Val]; ENSP00000403269:p.[Met373Val]; ENSP00000395974:p.[Met392Val]; ENSP00000404754:p.[Met236Val]; ENSP00000391935:p.[Met392Val]; ENSP00000323737:p.[Met432Val]; ENSP00000376320:p.[Met345Val]; ENSP00000338020:p.[Met439Val]; ENSP00000343450:p.[Met432Val]; ENSP00000371767:p.[Met439Val]; ENSP00000413159:p.[Met439Va…	ENSP00000343450:p.Met432Val	ENST00000342981:c.1294A>G	No	Yes
3	184429411	SNV	A	C	No	1		Homozygous	12	12	100	1	5	7	0.416667	37.1667	12	12	9	8		1	1	No	1	200	MAGEF1	protein_coding	MAGEF1	ENSG00000177383	MAGEF1	ensembl_havana	protein_coding	ENST00000317897:c.199T>G	ENSP00000315064:p.Leu67Val	ENSP00000315064:p.Leu67Val	ENST00000317897:c.199T>G	No	Yes
3	184766301	SNV	T	C	No	1		Homozygous	15	15	100	1	7	8	0.466667	38.2	15	15	11	11		1	1	No	1	200	VPS8	protein_coding	VPS8	ENSG00000156931	VPS8	ensembl_havana	protein_coding	ENST00000287546:c.[4091T>C]; ENST00000436792:c.[4085T>C]; ENST00000446204:c.[3815T>C]; ENST00000437079:c.[4091T>C]	ENSP00000287546:p.[Ile1364Thr]; ENSP00000404704:p.[Ile1362Thr]; ENSP00000405483:p.[Ile1272Thr]; ENSP00000397879:p.[Ile1364Thr]	ENSP00000287546:p.Ile1364Thr	ENST00000287546:c.4091T>C	No	Yes
3	185331165	SNV	C	A	No	1		Homozygous	26	26	100	1	13	13	0.5	39.3077	26	26	16	16		1	1	No	1	200	SENP2	protein_coding	SENP2	ENSG00000163904	SENP2	ensembl_havana	protein_coding	ENST00000545472:c.[872C>A]; ENST00000427465:c.[374C>A]; ENST00000296257:c.[902C>A]; ENST00000444509:c.[23C>A]; ENST00000413407:c.[*520C>A]	ENSP00000439653:p.[Thr291Lys]; ENSP00000394562:p.[Thr125Lys]; ENSP00000296257:p.[Thr301Lys]; ENSP00000399201:p.[Thr8Lys]	ENSP00000296257:p.Thr301Lys	ENST00000296257:c.902C>A	No	Yes
3	186301703	SNV	A	G	No	1		Homozygous	95	95	100	1	48	47	0.494737	38.7053	95	95	30	30		1	1	No	1	200	DNAJB11	protein_coding	DNAJB11	ENSG00000090520	DNAJB11	ensembl_havana	protein_coding	ENST00000439351:c.[790A>G]; ENST00000418776:c.[190A>G]; ENST00000265028:c.[790A>G]	ENSP00000414398:p.[Ile264Val]; ENSP00000408410:p.[Ile64Val]; ENSP00000265028:p.[Ile264Val]	ENSP00000414398:p.Ile264Val	ENST00000439351:c.790A>G	No	Yes
3	186760726	SNV	G	A	No	1		Homozygous	16	16	100	1	13	3	0.1875	38	16	16	12	12		1	1	No	1	200	ST6GAL1	protein_coding	ST6GAL1	ENSG00000073849	ST6GAL1	ensembl_havana	protein_coding	ENST00000457772:c.[-87+4065G>A]; ENST00000448044:c.[235G>A]; ENST00000446170:c.[235G>A]; ENST00000169298:c.[235G>A]; ENST00000423451:c.[235G>A]; ENST00000427315:c.[-86-8311G>A]; ENST00000438590:c.[235G>A]; ENST00000455441:c.[-86-8311G>A]; ENST00000448408:c.[235G>A]; ENST00000417392:c.[235G>A]	ENSP00000389337:p.[Gly79Ser]; ENSP00000388789:p.[Gly79Ser]; ENSP00000169298:p.[Gly79Ser]; ENSP00000411518:p.[Gly79Ser]; ENSP00000416163:p.[Gly79Ser]; ENSP00000390793:p.[Gly79Ser]; ENSP00000407631:p.[Gly79Ser]	ENSP00000169298:p.Gly79Ser	ENST00000169298:c.235G>A	No	Yes
3	191093175	SNV	T	A	No	1		Homozygous	15	15	100	1	7	8	0.466667	36	15	15	13	13		1	1	No	1	200	CCDC50	protein_coding	CCDC50	ENSG00000152492	CCDC50	ensembl_havana	protein_coding	ENST00000392455:c.[449-4773T>A]; ENST00000392456:c.[773T>A]	ENSP00000376250:p.Ile258Asn		ENST00000392455:c.449-4773T>A	No	Yes
3	191093310	SNV	A	G	No	1		Homozygous	7	7	100	1	4	3	0.428571	34.1429	7	7	6	6		1	1	No	1	200	CCDC50	protein_coding	CCDC50	ENSG00000152492	CCDC50	ensembl_havana	protein_coding	ENST00000392455:c.[449-4638A>G]; ENST00000392456:c.[908A>G]	ENSP00000376250:p.Lys303Arg		ENST00000392455:c.449-4638A>G	No	Yes
3	191097966	SNV	T	C	No	1		Homozygous	32	32	100	1	14	18	0.4375	36.6562	32	32	20	19		1	1	No	1	200	CCDC50	protein_coding	CCDC50	ENSG00000152492	CCDC50	ensembl_havana	protein_coding	ENST00000392456:c.[995T>C]; ENST00000392455:c.[467T>C]	ENSP00000376250:p.[Met332Thr]; ENSP00000376249:p.[Met156Thr]	ENSP00000376249:p.Met156Thr	ENST00000392455:c.467T>C	No	Yes
3	193031926	SNV	C	T	No	1		Homozygous	13	13	100	1	5	8	0.384615	37.9231	13	13	9	9		1	1	No	1	200	ATP13A5, ATP13A5-AS1	protein_coding, antisense	ATP13A5, ATP13A5-AS1	ENSG00000187527, ENSG00000236508	ATP13A5, ATP13A5-AS1	ensembl_havana, havana	protein_coding, antisense	ENST00000342358:c.2215G>A	ENSP00000341942:p.Gly739Ser	ENSP00000341942:p.Gly739Ser	ENST00000342358:c.2215G>A	No	Yes
3	193081122	SNV	G	T	No	1		Homozygous	20	20	100	1	5	15	0.25	39.35	20	20	13	12		1	1	No	1	200	ATP13A5	protein_coding	ATP13A5	ENSG00000187527	ATP13A5	ensembl_havana	protein_coding	ENST00000342358:c.[287C>A]; ENST00000446087:c.[353C>A]	ENSP00000341942:p.[Ser96Tyr]; ENSP00000389416:p.[Ser118Tyr]	ENSP00000341942:p.Ser96Tyr	ENST00000342358:c.287C>A	No	Yes
3	194337901	SNV	T	C	No	1		Homozygous	8	8	100	1	5	3	0.375	37.75	8	8	6	6		1	1	No	1	200	TMEM44	protein_coding	TMEM44	ENSG00000145014	TMEM44	ensembl_havana	protein_coding	ENST00000347147:c.[710A>G]; ENST00000392432:c.[851A>G]; ENST00000273580:c.[710A>G]; ENST00000473092:c.[710A>G]; ENST00000419280:c.[304-281A>G]; ENST00000381975:c.[710A>G]; ENST00000452358:c.[310-1502A>G]	ENSP00000333355:p.[Gln237Arg]; ENSP00000376227:p.[Gln284Arg]; ENSP00000273580:p.[Gln237Arg]; ENSP00000418674:p.[Gln237Arg]; ENSP00000371402:p.[Gln237Arg]	ENSP00000376227:p.Gln284Arg	ENST00000392432:c.851A>G	No	Yes
3	194790650	SNV	C	T	No	1		Homozygous	6	6	100	1	3	3	0.5	38	6	6	5	5		1	1	No	1	200	XXYLT1	protein_coding	XXYLT1	ENSG00000173950	XXYLT1	ensembl_havana	protein_coding	ENST00000429994:c.[538G>A]; ENST00000356740:c.[358G>A]; ENST00000437101:c.[367G>A]; ENST00000310380:c.[976G>A]; ENST00000355729:c.[367G>A]	ENSP00000399422:p.[Gly180Ser]; ENSP00000349179:p.[Gly120Ser]; ENSP00000409865:p.[Gly123Ser]; ENSP00000309640:p.[Gly326Ser]; ENSP00000347967:p.[Gly123Ser]	ENSP00000309640:p.Gly326Ser	ENST00000310380:c.976G>A	No	Yes
3	195447886	SNV	G	C	No	1		Homozygous	6	6	100	1	6	0	0	36.5	6	6	4	4		1	1	No	1	200	LINC00969, MUC20	lincRNA, protein_coding	LINC00969, MUC20	ENSG00000242086, ENSG00000176945	LINC00969, MUC20	ensembl_havana, ensembl_havana	lincRNA, protein_coding	ENST00000320736:c.[8G>C]; ENST00000436408:c.[8G>C]; ENST00000447234:c.[8G>C]	ENSP00000325431:p.[Cys3Ser]; ENSP00000396774:p.[Cys3Ser]; ENSP00000414350:p.[Cys3Ser]	ENSP00000325431:p.Cys3Ser	ENST00000320736:c.8G>C	No	Yes
3	195451905	SNV	G	A	No	1		Homozygous	8	8	100	1	4	4	0.5	37.875	8	8	7	6		1	1	No	1	200	LINC00969, MUC20	lincRNA, protein_coding	LINC00969, MUC20	ENSG00000242086, ENSG00000176945	LINC00969, MUC20	ensembl_havana, ensembl_havana	lincRNA, protein_coding	ENST00000320736:c.[431G>A]; ENST00000436408:c.[431G>A]; ENST00000447234:c.[431G>A]; ENST00000445522:c.[326G>A]	ENSP00000325431:p.[Cys144Tyr]; ENSP00000396774:p.[Cys144Tyr]; ENSP00000414350:p.[Cys144Tyr]; ENSP00000405629:p.[Cys109Tyr]	ENSP00000325431:p.Cys144Tyr	ENST00000320736:c.431G>A	No	Yes
3	195452783	SNV	C	T	No	1		Homozygous	12	12	100	1	4	8	0.333333	39.6667	12	12	9	9		1	1	No	1	200	LINC00969, MUC20	lincRNA, protein_coding	LINC00969, MUC20	ENSG00000242086, ENSG00000176945	LINC00969, MUC20	ensembl_havana, ensembl_havana	lincRNA, protein_coding	ENST00000320736:c.[796C>T]; ENST00000447234:c.[1309C>T]; ENST00000436408:c.[1309C>T]; ENST00000445522:c.[1204C>T]	ENSP00000325431:p.[Pro266Ser]; ENSP00000414350:p.[Pro437Ser]; ENSP00000396774:p.[Pro437Ser]; ENSP00000405629:p.[Pro402Ser]	ENSP00000325431:p.Pro266Ser	ENST00000320736:c.796C>T	No	Yes
3	195452805	SNV	T	C	No	1		Homozygous	10	11	90.9091	1	7	3	0.3	38.2	10	11	8	8		0.975056	1	No	1	200	LINC00969, MUC20	lincRNA, protein_coding	LINC00969, MUC20	ENSG00000242086, ENSG00000176945	LINC00969, MUC20	ensembl_havana, ensembl_havana	lincRNA, protein_coding	ENST00000447234:c.[1331T>C]; ENST00000445522:c.[1226T>C]; ENST00000436408:c.[1331T>C]; ENST00000320736:c.[818T>C]	ENSP00000414350:p.[Leu444Pro]; ENSP00000405629:p.[Leu409Pro]; ENSP00000396774:p.[Leu444Pro]; ENSP00000325431:p.[Leu273Pro]	ENSP00000325431:p.Leu273Pro	ENST00000320736:c.818T>C	No	Yes
3	195453014	SNV	G	A	No	1		Homozygous	8	8	100	1	3	5	0.375	36.625	8	8	6	6		1	1	No	1	200	LINC00969, MUC20	lincRNA, protein_coding	LINC00969, MUC20	ENSG00000242086, ENSG00000176945	LINC00969, MUC20	ensembl_havana, ensembl_havana	lincRNA, protein_coding	ENST00000447234:c.[1540G>A]; ENST00000445522:c.[1435G>A]; ENST00000320736:c.[1027G>A]; ENST00000436408:c.[1540G>A]	ENSP00000414350:p.[Gly514Arg]; ENSP00000405629:p.[Gly479Arg]; ENSP00000325431:p.[Gly343Arg]; ENSP00000396774:p.[Gly514Arg]	ENSP00000325431:p.Gly343Arg	ENST00000320736:c.1027G>A	No	Yes
3	195453257	SNV	G	A	No	1		Homozygous	14	14	100	1	10	4	0.285714	38.3571	14	14	8	8		1	1	No	1	200	LINC00969, MUC20	lincRNA, protein_coding	LINC00969, MUC20	ENSG00000242086, ENSG00000176945	LINC00969, MUC20	ensembl_havana, ensembl_havana	lincRNA, protein_coding	ENST00000445522:c.[1678G>A]; ENST00000436408:c.[1783G>A]; ENST00000447234:c.[1783G>A]; ENST00000423938:c.[16G>A]; ENST00000320736:c.[1270G>A]	ENSP00000405629:p.[Ala560Thr]; ENSP00000396774:p.[Ala595Thr]; ENSP00000414350:p.[Ala595Thr]; ENSP00000397774:p.[Ala6Thr]; ENSP00000325431:p.[Ala424Thr]	ENSP00000325431:p.Ala424Thr	ENST00000320736:c.1270G>A	No	Yes
3	195453345	SNV	C	T	No	1		Heterozygous	6	9	66.6667	1	2	4	0.333333	36.8333	6	9	5	6	0	0.766056	0.805822	No	1	200	LINC00969, MUC20	lincRNA, protein_coding	LINC00969, MUC20	ENSG00000242086, ENSG00000176945	LINC00969, MUC20	ensembl_havana, ensembl_havana	lincRNA, protein_coding	ENST00000320736:c.[1358C>T]; ENST00000445522:c.[1766C>T]; ENST00000436408:c.[1871C>T]; ENST00000447234:c.[1871C>T]; ENST00000423938:c.[104C>T]	ENSP00000325431:p.[Thr453Ile]; ENSP00000405629:p.[Thr589Ile]; ENSP00000396774:p.[Thr624Ile]; ENSP00000414350:p.[Thr624Ile]; ENSP00000397774:p.[Thr35Ile]	ENSP00000325431:p.Thr453Ile	ENST00000320736:c.1358C>T	No	Yes
3	195800811	SNV	C	T	No	1		Homozygous	63	63	100	1	13	50	0.206349	37.8254	63	63	30	26		1	1	No	1	200	TFRC	protein_coding	TFRC	ENSG00000072274	TFRC	ensembl_havana	protein_coding	ENST00000421258:c.[238+1219G>A]; ENST00000535031:c.[-412-1788G>A]; ENST00000420415:c.[181G>A]; ENST00000360110:c.[424G>A]; ENST00000540528:c.[*177G>A]; ENST00000392396:c.[424G>A]	ENSP00000390133:p.[Gly61Ser]; ENSP00000353224:p.[Gly142Ser]; ENSP00000376197:p.[Gly142Ser]	ENSP00000353224:p.Gly142Ser	ENST00000360110:c.424G>A	No	Yes
4	844728	SNV	A	C	No	1		Homozygous	25	26	96.1538	1	12	13	0.48	39.24	25	26	17	16		0.999976	1	No	1	200	GAK	protein_coding	GAK	ENSG00000178950	GAK	ensembl_havana	protein_coding	ENST00000504668:c.[*40T>G]; ENST00000314167:c.[3653T>G]; ENST00000511980:c.[1118T>G]; ENST00000511163:c.[3416T>G]	ENSP00000314499:p.[Leu1218Arg]; ENSP00000421049:p.[Leu373Arg]; ENSP00000421361:p.[Leu1139Arg]	ENSP00000314499:p.Leu1218Arg	ENST00000314167:c.3653T>G	No	Yes
4	944249	SNV	T	C	No	1		Homozygous	17	17	100	1	10	7	0.411765	37.9412	17	17	11	11		1	1	No	1	200	TMEM175	protein_coding	TMEM175	ENSG00000127419	TMEM175	ensembl_havana	protein_coding	ENST00000507319:c.[230T>C]; ENST00000514546:c.[233T>C]; ENST00000514453:c.[194T>C]; ENST00000513682:c.[*104T>C]; ENST00000510493:c.[-14T>C]; ENST00000515492:c.[-14T>C]; ENST00000508204:c.[-14T>C]; ENST00000515740:c.[-152T>C]; ENST00000509508:c.[-14T>C]; ENST00000504744:c.[*216T>C]; ENST00000513952:c.[*219T>C]; ENST00000264771:c.[233T>C]	ENSP00000424746:p.[Ile77Thr]; ENSP00000425763:p.[Ile78Thr]; ENSP00000425181:p.[Ile65Thr]; ENSP00000264771:p.[Ile78Thr]		ENST00000513952:c.*219T>C	No	Yes
4	951667	SNV	G	A	No	1		Homozygous	6	6	100	1	3	3	0.5	35.3333	6	6	5	5		1	1	No	1	200	TMEM175	protein_coding	TMEM175	ENSG00000127419	TMEM175	ensembl_havana	protein_coding	ENST00000510493:c.[652G>A]; ENST00000264771:c.[898G>A]; ENST00000515740:c.[550G>A]; ENST00000508204:c.[652G>A]; ENST00000513952:c.[*920G>A]	ENSP00000424208:p.[Val218Met]; ENSP00000264771:p.[Val300Met]; ENSP00000427039:p.[Val184Met]; ENSP00000423669:p.[Val218Met]		ENST00000513952:c.*920G>A	No	Yes
4	1330759	SNV	T	C	No	1		Homozygous	38	38	100	1	27	11	0.289474	37.5789	38	38	19	20		1	1	No	1	200	MAEA	protein_coding	MAEA	ENSG00000090316	MAEA	ensembl_havana	protein_coding	ENST00000514708:c.[676T>C]; ENST00000505839:c.[732T>C]; ENST00000452175:c.[639T>C]; ENST00000510794:c.[873T>C]; ENST00000264750:c.[753T>C]; ENST00000303400:c.[876T>C]; ENST00000505177:c.[990T>C]; ENST00000509531:c.[676T>C]; ENST00000503653:c.[799T>C]	ENSP00000427512:p.[Trp226Arg]; ENSP00000426966:p.[Trp226Arg]; ENSP00000421644:p.[Trp267Arg]		ENST00000303400:c.876T>C	No	Yes
4	2702066	SNV	G	C	No	1		Homozygous	11	11	100	1	6	5	0.454545	37.6364	11	11	10	10		1	1	No	1	200	FAM193A	protein_coding	FAM193A	ENSG00000125386	FAM193A	ensembl_havana	protein_coding	ENST00000545951:c.[3294G>C]; ENST00000324666:c.[3294G>C]; ENST00000505311:c.[3294G>C]; ENST00000513898:c.[*892G>C]; ENST00000502458:c.[3360G>C]; ENST00000512465:c.[*868G>C]; ENST00000382839:c.[3294G>C]; ENST00000513350:c.[2856G>C]	ENSP00000443617:p.[Glu1098Asp]; ENSP00000324587:p.[Glu1098Asp]; ENSP00000421200:p.[Glu1098Asp]; ENSP00000427505:p.[Glu1120Asp]; ENSP00000372290:p.[Glu1098Asp]; ENSP00000427260:p.[Glu952Asp]	ENSP00000324587:p.Glu1098Asp	ENST00000324666:c.3294G>C	No	Yes
4	2932855	SNV	C	T	No	1		Homozygous	44	44	100	1	25	19	0.431818	37.5909	44	44	21	21		1	1	No	1	200	MFSD10	protein_coding	MFSD10	ENSG00000109736	MFSD10	ensembl_havana	protein_coding	ENST00000507272:c.[*782G>A]; ENST00000355443:c.[1185G>A]; ENST00000507555:c.[1076G>A]; ENST00000508221:c.[1046G>A]; ENST00000329687:c.[1185G>A]; ENST00000514800:c.[1185G>A]; ENST00000503596:c.[*353G>A]	ENSP00000423402:p.[Arg359Gln]; ENSP00000425757:p.[Arg349Gln]		ENST00000329687:c.1185G>A	No	Yes
4	2943361	SNV	T	C	No	1		Homozygous	31	31	100	1	14	17	0.451613	36.3226	31	31	21	21		1	1	No	1	200	NOP14-AS1, NOP14	antisense, protein_coding	NOP14-AS1, NOP14	ENSG00000249673, ENSG00000087269	NOP14-AS1, NOP14	havana, ensembl_havana	antisense, protein_coding	ENST00000314262:c.[2147A>G]; ENST00000502735:c.[2147A>G]; ENST00000398071:c.[2147A>G]; ENST00000416614:c.[2147A>G]	ENSP00000315674:p.[Gln716Arg]; ENSP00000427415:p.[Gln716Arg]; ENSP00000381146:p.[Gln716Arg]; ENSP00000405068:p.[Gln716Arg]	ENSP00000405068:p.Gln716Arg	ENST00000416614:c.2147A>G	No	Yes
4	2951804	SNV	A	G	No	1		Homozygous	35	35	100	1	8	27	0.228571	38.6286	35	35	18	18		1	1	No	1	200	NOP14-AS1, NOP14	antisense, protein_coding	NOP14-AS1, NOP14	ENSG00000249673, ENSG00000087269	NOP14-AS1, NOP14	havana, ensembl_havana	antisense, protein_coding	ENST00000502735:c.[1139T>C]; ENST00000398071:c.[1139T>C]; ENST00000416614:c.[1139T>C]; ENST00000314262:c.[1139T>C]	ENSP00000427415:p.[Leu380Ser]; ENSP00000381146:p.[Leu380Ser]; ENSP00000405068:p.[Leu380Ser]; ENSP00000315674:p.[Leu380Ser]	ENSP00000405068:p.Leu380Ser	ENST00000416614:c.1139T>C	No	Yes
4	3215835	SNV	T	C	No	1		Homozygous	7	7	100	1	1	6	0.142857	37.7143	7	7	7	7		1	1	No	1	200	HTT	protein_coding	HTT	ENSG00000197386	HTT	ensembl_havana	protein_coding	ENST00000355072:c.6925T>C	ENSP00000347184:p.Tyr2309His	ENSP00000347184:p.Tyr2309His	ENST00000355072:c.6925T>C	No	Yes
4	4276132	SNV	T	C	No	1		Homozygous	43	43	100	1	25	18	0.418605	37.3256	43	43	21	20		1	1	No	1	200	LYAR	protein_coding	LYAR	ENSG00000145220	LYAR	ensembl_havana	protein_coding	ENST00000452476:c.[794A>G]; ENST00000343470:c.[794A>G]	ENSP00000397367:p.[His265Arg]; ENSP00000345917:p.[His265Arg]	ENSP00000345917:p.His265Arg	ENST00000343470:c.794A>G	No	Yes
4	6302519	SNV	G	A	No	1		Homozygous	15	15	100	1	6	9	0.4	36.1333	15	15	10	9		1	1	No	1	200	WFS1	protein_coding	WFS1	ENSG00000109501	WFS1	ensembl_havana	protein_coding	ENST00000226760:c.[997G>A]; ENST00000503569:c.[997G>A]; ENST00000506362:c.[628G>A]	ENSP00000226760:p.[Val333Ile]; ENSP00000423337:p.[Val333Ile]; ENSP00000424103:p.[Val210Ile]	ENSP00000226760:p.Val333Ile	ENST00000226760:c.997G>A	No	Yes
4	15628565	SNV	A	G	No	1		Homozygous	20	20	100	1	14	6	0.3	35	20	20	13	13		1	1	No	1	200	FBXL5	protein_coding	FBXL5	ENSG00000118564	FBXL5	ensembl_havana	protein_coding	ENST00000513163:c.[815T>C]; ENST00000382358:c.[677T>C]; ENST00000412094:c.[1004T>C]; ENST00000341285:c.[1055T>C]; ENST00000511441:c.[*826T>C]	ENSP00000425472:p.[Leu272Ser]; ENSP00000371795:p.[Leu226Ser]; ENSP00000408679:p.[Leu335Ser]; ENSP00000344866:p.[Leu352Ser]	ENSP00000344866:p.Leu352Ser	ENST00000341285:c.1055T>C	No	Yes
4	15690233	SNV	C	A	No	1		Homozygous	7	7	100	1	6	1	0.142857	38.5714	7	7	6	6		1	1	No	1	200	FAM200B	protein_coding	FAM200B	ENSG00000237765	FAM200B	ensembl_havana	protein_coding	ENST00000422728:c.1633C>A	ENSP00000393017:p.His545Asn	ENSP00000393017:p.His545Asn	ENST00000422728:c.1633C>A	No	Yes
4	15938177^15938178	Insertion	-	T	No	1		Heterozygous	7	184	3.80435	1	3	4	0.428571	37.2857	7	184	5	6	0	0.175786	0.966881	Yes	9	200	FGFBP1	protein_coding	FGFBP1	ENSG00000137440	FGFBP1	ensembl_havana	protein_coding	ENST00000259988:c.[78_79insA]; ENST00000382333:c.[78_79insA]	ENSP00000259988:p.[Val27fs]; ENSP00000371770:p.[Val27fs]	ENSP00000371770:p.Val27fs	ENST00000382333:c.78_79insA	No	Yes
4	16002228	SNV	C	T	No	1		Homozygous	19	19	100	1	11	8	0.421053	37.2105	19	19	10	10		1	1	No	1	200	PROM1	protein_coding	PROM1	ENSG00000007062	PROM1	ensembl_havana	protein_coding	ENST00000447510:c.[1469G>A]; ENST00000543373:c.[1442G>A]; ENST00000505450:c.[1442G>A]; ENST00000539194:c.[1469G>A]; ENST00000510224:c.[1469G>A]; ENST00000540805:c.[1469G>A]; ENST00000508167:c.[1442G>A]	ENSP00000415481:p.[Ser490Asn]; ENSP00000445526:p.[Ser481Asn]; ENSP00000426090:p.[Ser481Asn]; ENSP00000443620:p.[Ser490Asn]; ENSP00000426809:p.[Ser490Asn]; ENSP00000438045:p.[Ser490Asn]; ENSP00000427346:p.[Ser481Asn]	ENSP00000426090:p.Ser481Asn	ENST00000505450:c.1442G>A	No	Yes
4	16077396	SNV	T	C	No	1		Homozygous	16	16	100	1	5	11	0.3125	38.25	16	16	10	10		1	1	No	1	200	PROM1	protein_coding	PROM1	ENSG00000007062	PROM1	ensembl_havana	protein_coding	ENST00000447510:c.[134A>G]; ENST00000508322:c.[134A>G]; ENST00000505450:c.[134A>G]; ENST00000510224:c.[134A>G]; ENST00000511153:c.[5A>G]; ENST00000543373:c.[134A>G]; ENST00000540805:c.[134A>G]; ENST00000539194:c.[134A>G]; ENST00000508167:c.[134A>G]	ENSP00000415481:p.[Asp45Gly]; ENSP00000425927:p.[Asp45Gly]; ENSP00000426090:p.[Asp45Gly]; ENSP00000426809:p.[Asp45Gly]; ENSP00000424569:p.[Asp2Gly]; ENSP00000445526:p.[Asp45Gly]; ENSP00000438045:p.[Asp45Gly]; ENSP00000443620:p.[Asp45Gly]; ENSP00000427346:p.[Asp45Gly]	ENSP00000426090:p.Asp45Gly	ENST00000505450:c.134A>G	No	Yes
4	16077427	SNV	C	G	No	1		Homozygous	13	13	100	1	8	5	0.384615	37.4615	13	13	9	8		1	1	No	1	200	PROM1	protein_coding	PROM1	ENSG00000007062	PROM1	ensembl_havana	protein_coding	ENST00000508167:c.[103G>C]; ENST00000447510:c.[103G>C]; ENST00000508322:c.[103G>C]; ENST00000508940:c.[103G>C]; ENST00000505450:c.[103G>C]; ENST00000540805:c.[103G>C]; ENST00000543373:c.[103G>C]; ENST00000510224:c.[103G>C]; ENST00000539194:c.[103G>C]	ENSP00000427346:p.[Glu35Gln]; ENSP00000415481:p.[Glu35Gln]; ENSP00000425927:p.[Glu35Gln]; ENSP00000422704:p.[Glu35Gln]; ENSP00000426090:p.[Glu35Gln]; ENSP00000438045:p.[Glu35Gln]; ENSP00000445526:p.[Glu35Gln]; ENSP00000426809:p.[Glu35Gln]; ENSP00000443620:p.[Glu35Gln]	ENSP00000426090:p.Glu35Gln	ENST00000505450:c.103G>C	No	Yes
4	24550501^24550502	Insertion	-	T	No	1		Heterozygous	13	170	7.64706	1	7	6	0.461538	37.7692	13	170	6	8	0	0.543843	1	Yes	6	200	DHX15	protein_coding	DHX15	ENSG00000109606	DHX15	ensembl_havana	protein_coding	ENST00000336812:c.1224_1225insA	ENSP00000336741:p.Gln409fs	ENSP00000336741:p.Gln409fs	ENST00000336812:c.1224_1225insA	No	Yes
4	25314520	SNV	C	T	No	1		Homozygous	6	6	100	1	6	0	0	38.5	6	6	4	4		1	1	No	1	200	ZCCHC4	protein_coding	ZCCHC4	ENSG00000168228	ZCCHC4	ensembl_havana	protein_coding	ENST00000507760:c.[89C>T]; ENST00000302874:c.[89C>T]	ENSP00000422115:p.[Pro30Leu]; ENSP00000303468:p.[Pro30Leu]	ENSP00000303468:p.Pro30Leu	ENST00000302874:c.89C>T	No	Yes
4	37903756	SNV	T	C	No	1		Homozygous	7	7	100	1	5	2	0.285714	38.4286	7	7	6	6		1	1	No	1	200	TBC1D1	protein_coding	TBC1D1	ENSG00000065882	TBC1D1	ensembl_havana	protein_coding	ENST00000510573:c.[40T>C]; ENST00000402522:c.[40T>C]; ENST00000261439:c.[40T>C]; ENST00000508802:c.[40T>C]	ENSP00000421641:p.[Ser14Pro]; ENSP00000383994:p.[Ser14Pro]; ENSP00000261439:p.[Ser14Pro]; ENSP00000423651:p.[Ser14Pro]	ENSP00000261439:p.Ser14Pro	ENST00000261439:c.40T>C	No	Yes
4	38799710	SNV	T	C	No	1		Homozygous	6	6	100	1	2	4	0.333333	39.8333	6	6	3	3		1	1	No	1	200	TLR1	protein_coding	TLR1	ENSG00000174125	TLR1	ensembl_havana	protein_coding	ENST00000308979:c.[743A>G]; ENST00000502213:c.[743A>G]	ENSP00000354932:p.[Asn248Ser]; ENSP00000421259:p.[Asn248Ser]	ENSP00000354932:p.Asn248Ser	ENST00000308979:c.743A>G	No	Yes
4	41673604	SNV	T	C	No	1		Homozygous	17	17	100	1	9	8	0.470588	38.5294	17	17	10	10		1	1	No	1	200	LIMCH1	protein_coding	LIMCH1	ENSG00000064042	LIMCH1	ensembl_havana	protein_coding	ENST00000509277:c.[1778T>C]; ENST00000513024:c.[1838T>C]; ENST00000508466:c.[1778T>C]; ENST00000514096:c.[1799T>C]; ENST00000511496:c.[1799T>C]; ENST00000313860:c.[2276T>C]; ENST00000512632:c.[2137-8419T>C]; ENST00000396595:c.[1814T>C]; ENST00000503057:c.[3431T>C]; ENST00000512820:c.[2315T>C]; ENST00000381753:c.[1778T>C]; ENST00000508501:c.[2276T>C]; ENST00000512946:c.[2276T>C]	ENSP00000422864:p.[Met593Thr]; ENSP00000425222:p.[Met613Thr]; ENSP00000421656:p.[Met593Thr]; ENSP00000426334:p.[Met600Thr]; ENSP00000421242:p.[Met600Thr]; ENSP00000316891:p.[Met759Thr]; ENSP00000379840:p.[Met605Thr]; ENSP00000425631:p.[Met1144Thr]; ENSP00000424437:p.[Met772Thr]; ENSP00000371172:p.[Met593Thr]; ENSP00000424825:p.[Met759Thr]; ENSP00000424645:p.[Met759Thr]	ENSP00000316891:p.Met759Thr	ENST00000313860:c.2276T>C	No	Yes
4	42003671	SNV	A	G	No	1		Homozygous	24	24	100	1	17	7	0.291667	38.9583	24	24	12	12		1	1	No	1	200	SLC30A9	protein_coding	SLC30A9	ENSG00000014824	SLC30A9	ensembl_havana	protein_coding	ENST00000264451:c.[148A>G]; ENST00000513699:c.[148A>G]	ENSP00000264451:p.[Met50Val]; ENSP00000423529:p.[Met50Val]	ENSP00000264451:p.Met50Val	ENST00000264451:c.148A>G	No	Yes
4	42020142	SNV	A	G	No	1		Homozygous	17	17	100	1	12	5	0.294118	37.5882	17	17	9	8		1	1	No	1	200	SLC30A9	protein_coding	SLC30A9	ENSG00000014824	SLC30A9	ensembl_havana	protein_coding	ENST00000513699:c.[289A>G]; ENST00000264451:c.[289A>G]	ENSP00000423529:p.[Thr97Ala]; ENSP00000264451:p.[Thr97Ala]	ENSP00000264451:p.Thr97Ala	ENST00000264451:c.289A>G	No	Yes
4	47593283	SNV	G	C	No	1		Homozygous	6	6	100	1	0	6	0	38.3333	6	6	4	4		1	1	No	1	200	ATP10D	protein_coding	ATP10D	ENSG00000145246	ATP10D	ensembl_havana	protein_coding	ENST00000503288:c.[*1848G>C]; ENST00000273859:c.[4166G>C]	ENSP00000273859:p.Ser1389Thr	ENSP00000273859:p.Ser1389Thr	ENST00000273859:c.4166G>C	No	Yes
4	57843300	SNV	T	C	No	1		Homozygous	6	6	100	1	5	1	0.166667	37.6667	6	6	6	6		1	1	No	1	200	NOA1	protein_coding	NOA1	ENSG00000084092	NOA1	ensembl_havana	protein_coding	ENST00000264230:c.452A>G	ENSP00000264230:p.Gln151Arg	ENSP00000264230:p.Gln151Arg	ENST00000264230:c.452A>G	No	Yes
4	71705262	SNV	A	G	No	1		Homozygous	13	13	100	1	1	12	0.0769231	37	13	13	5	5		1	1	No	1	200	GRSF1	protein_coding	GRSF1	ENSG00000132463	GRSF1	ensembl_havana	protein_coding	ENST00000254799:c.283T>C	ENSP00000254799:p.Ser95Pro	ENSP00000254799:p.Ser95Pro	ENST00000254799:c.283T>C	No	Yes
4	76650067^76650068	Insertion	-	T	No	1		Heterozygous	7	14	50	1	2	5	0.285714	37.7143	7	14	4	4	0	0.631338	0.592609	No	1	200	USO1	protein_coding	USO1	ENSG00000138768	USO1	ensembl_havana	protein_coding	ENST00000514213:c.[64_65insT]; ENST00000603759:c.[64_65insT]; ENST00000538159:c.[64_65insT]	ENSP00000444850:p.[Thr22fs]; ENSP00000474837:p.[Thr22fs]; ENSP00000440586:p.[Thr22fs]	ENSP00000440586:p.Thr22fs	ENST00000538159:c.64_65insT	No	Yes
4	77033590	SNV	C	T	No	1		Homozygous	10	10	100	1	0	10	0	39.9	10	10	5	6		1	1	No	1	200	ART3	protein_coding	ART3	ENSG00000156219	ART3	ensembl_havana	protein_coding	ENST00000341029:c.[1022C>T]; ENST00000355810:c.[1088C>T]; ENST00000349321:c.[1055C>T]	ENSP00000343843:p.[Ser341Leu]; ENSP00000348064:p.[Ser363Leu]; ENSP00000304313:p.[Ser352Leu]	ENSP00000348064:p.Ser363Leu	ENST00000355810:c.1088C>T	No	Yes
4	77660162	SNV	G	C	No	1		Homozygous	7	7	100	1	1	6	0.142857	35.4286	7	7	5	5		1	1	No	1	200	SHROOM3	protein_coding	SHROOM3	ENSG00000138771	SHROOM3	ensembl_havana	protein_coding	ENST00000296043:c.836G>C	ENSP00000296043:p.Gly279Ala	ENSP00000296043:p.Gly279Ala	ENST00000296043:c.836G>C	No	Yes
4	77675505	SNV	C	T	No	1		Homozygous	10	10	100	1	10	0	0	36.6	10	10	7	7		1	1	No	1	200	SHROOM3	protein_coding	SHROOM3	ENSG00000138771	SHROOM3	ensembl_havana	protein_coding	ENST00000296043:c.3869C>T	ENSP00000296043:p.Pro1290Leu	ENSP00000296043:p.Pro1290Leu	ENST00000296043:c.3869C>T	No	Yes
4	83348624^83348625	Insertion	-	T	No	1		Heterozygous	6	481	1.2474	1	1	5	0.166667	39.3333	6	481	5	4	0	0.0854657	0.588042	Yes	7	200	HNRNPDL	protein_coding	HNRNPDL	ENSG00000152795	HNRNPDL	ensembl_havana	protein_coding	ENST00000349655:c.[510_511insA]; ENST00000602300:c.[510_511insA]; ENST00000295470:c.[867_868insA]; ENST00000502762:c.[867_868insA]	ENSP00000338552:p.[Leu171fs]; ENSP00000473677:p.[Leu171fs]; ENSP00000295470:p.[Leu290fs]; ENSP00000422040:p.[Leu290fs]	ENSP00000295470:p.Leu290fs	ENST00000295470:c.867_868insA	No	Yes
4	84230619	SNV	T	C	No	1		Homozygous	9	9	100	1	6	3	0.333333	40	9	9	9	9		1	1	No	1	200	HPSE	protein_coding	HPSE	ENSG00000173083	HPSE	ensembl_havana	protein_coding	ENST00000508891:c.[*70A>G]; ENST00000405413:c.[920A>G]; ENST00000509906:c.[920A>G]; ENST00000512196:c.[920A>G]; ENST00000311412:c.[920A>G]; ENST00000513463:c.[746A>G]; ENST00000507150:c.[*70A>G]	ENSP00000384262:p.[Lys307Arg]; ENSP00000421038:p.[Lys307Arg]; ENSP00000423265:p.[Lys307Arg]; ENSP00000308107:p.[Lys307Arg]; ENSP00000421365:p.[Lys249Arg]	ENSP00000384262:p.Lys307Arg	ENST00000405413:c.920A>G	No	Yes
4	87693992	SNV	T	C	No	1		Homozygous	7	7	100	1	6	1	0.142857	39.7143	7	7	7	7		1	1	No	1	200	PTPN13	protein_coding	PTPN13	ENSG00000163629	PTPN13	ensembl_havana	protein_coding	ENST00000427191:c.[5173T>C]; ENST00000316707:c.[4657T>C]; ENST00000511467:c.[5245T>C]; ENST00000411767:c.[5230T>C]; ENST00000436978:c.[5245T>C]	ENSP00000408368:p.[Ser1725Pro]; ENSP00000322675:p.[Ser1553Pro]; ENSP00000426626:p.[Ser1749Pro]; ENSP00000407249:p.[Ser1744Pro]; ENSP00000394794:p.[Ser1749Pro]	ENSP00000394794:p.Ser1749Pro	ENST00000436978:c.5245T>C	No	Yes
4	87706506	SNV	T	G	No	1		Homozygous	16	16	100	1	7	9	0.4375	37.6875	16	16	11	11		1	1	No	1	200	PTPN13	protein_coding	PTPN13	ENSG00000163629	PTPN13	ensembl_havana	protein_coding	ENST00000511467:c.[6256T>G]; ENST00000436978:c.[6256T>G]; ENST00000427191:c.[6184T>G]; ENST00000316707:c.[5668T>G]; ENST00000411767:c.[6241T>G]	ENSP00000426626:p.[Tyr2086Asp]; ENSP00000394794:p.[Tyr2086Asp]; ENSP00000408368:p.[Tyr2062Asp]; ENSP00000322675:p.[Tyr1890Asp]; ENSP00000407249:p.[Tyr2081Asp]	ENSP00000394794:p.Tyr2086Asp	ENST00000436978:c.6256T>G	No	Yes
4	88258483	SNV	T	C	No	1		Homozygous	9	9	100	1	4	5	0.444444	38.2222	9	9	5	5		1	1	No	1	200	RP11-529H2.2, HSD17B11	processed_transcript, protein_coding	RP11-529H2.2, HSD17B11	ENSG00000255723, ENSG00000198189	RP11-529H2.2, HSD17B11	havana, ensembl_havana	processed_transcript, protein_coding	ENST00000507286:c.[716A>G]; ENST00000358290:c.[848A>G]	ENSP00000423775:p.[Gln239Arg]; ENSP00000351035:p.[Gln283Arg]	ENSP00000351035:p.Gln283Arg	ENST00000358290:c.848A>G	No	Yes
4	89444809	SNV	C	T	No	1		Homozygous	6	7	85.7143	1	5	1	0.166667	37.6667	6	7	6	6		0.960896	0.99924	No	1	200	PYURF, HERC3	protein_coding, protein_coding	PYURF, HERC3	ENSG00000145337, ENSG00000138641	PYURF, HERC3	ensembl_havana, ensembl_havana	protein_coding, protein_coding	ENST00000273968:c.43G>A	ENSP00000273968:p.Gly15Arg	ENSP00000273968:p.Gly15Arg	ENST00000273968:c.43G>A	No	Yes
4	95539267	SNV	G	A	No	1		Homozygous	8	8	100	1	7	1	0.125	38.875	8	8	5	5		1	1	No	1	200	PDLIM5	protein_coding	PDLIM5	ENSG00000163110	PDLIM5	ensembl_havana	protein_coding	ENST00000542407:c.[667G>A]; ENST00000317968:c.[1033G>A]; ENST00000509357:c.[*260G>A]; ENST00000437932:c.[706G>A]; ENST00000514743:c.[1120G>A]; ENST00000503974:c.[724G>A]; ENST00000506632:c.[259G>A]	ENSP00000442187:p.[Ala223Thr]; ENSP00000321746:p.[Ala345Thr]; ENSP00000398469:p.[Ala236Thr]; ENSP00000424360:p.[Ala374Thr]; ENSP00000424297:p.[Ala242Thr]; ENSP00000422528:p.[Ala87Thr]	ENSP00000321746:p.Ala345Thr	ENST00000317968:c.1033G>A	No	Yes
4	95578588	SNV	G	A	No	1		Homozygous	20	20	100	1	14	6	0.3	37.05	20	20	12	12		1	1	No	1	200	PDLIM5	protein_coding	PDLIM5	ENSG00000163110	PDLIM5	ensembl_havana	protein_coding	ENST00000506632:c.[*102G>A]; ENST00000503974:c.[1166G>A]; ENST00000317968:c.[1475G>A]; ENST00000514743:c.[1562G>A]; ENST00000542407:c.[1109G>A]; ENST00000437932:c.[1148G>A]	ENSP00000424297:p.[Ser389Asn]; ENSP00000321746:p.[Ser492Asn]; ENSP00000424360:p.[Ser521Asn]; ENSP00000442187:p.[Ser370Asn]; ENSP00000398469:p.[Ser383Asn]	ENSP00000321746:p.Ser492Asn	ENST00000317968:c.1475G>A	No	Yes
4	100870465..100870466	MNV	AC	GT	No	2		Heterozygous	11	1015	1.08374	1	11	0	0	35.4999	11	1015	4	4	3.01	2.94078e-09	0.0174304	No	1	200	H2AFZ	protein_coding	H2AFZ	ENSG00000164032	H2AFZ	ensembl_havana	protein_coding	ENST00000296417:c.159_160delGTinsAC	ENSP00000296417:p.Tyr54His	ENSP00000296417:p.Tyr54His	ENST00000296417:c.159_160delGTinsAC	No	Yes
4	108931039	SNV	T	C	No	1		Homozygous	73	73	100	1	43	30	0.410959	37.3151	73	73	27	28		1	1	No	1	200	HADH	protein_coding	HADH	ENSG00000138796	HADH	ensembl_havana	protein_coding	ENST00000403312:c.[434T>C]; ENST00000309522:c.[257T>C]; ENST00000454409:c.[269T>C]; ENST00000603302:c.[257T>C]; ENST00000505878:c.[269T>C]	ENSP00000385638:p.[Leu145Pro]; ENSP00000312288:p.[Leu86Pro]; ENSP00000395167:p.[Leu90Pro]; ENSP00000474560:p.[Leu86Pro]; ENSP00000425952:p.[Leu90Pro]	ENSP00000425952:p.Leu90Pro	ENST00000505878:c.269T>C	No	Yes
4	110901198	SNV	G	A	No	1		Homozygous	7	7	100	1	5	2	0.285714	40.1429	7	7	3	3		1	1	No	1	200	EGF	protein_coding	EGF	ENSG00000138798	EGF	ensembl_havana	protein_coding	ENST00000509793:c.[1998G>A]; ENST00000265171:c.[2124G>A]; ENST00000503392:c.[2124G>A]	ENSP00000424316:p.[Met666Ile]; ENSP00000265171:p.[Met708Ile]; ENSP00000421384:p.[Met708Ile]	ENSP00000265171:p.Met708Ile	ENST00000265171:c.2124G>A	No	Yes
4	113066831	SNV	G	A	No	1		Homozygous	7	7	100	1	7	0	0	36.1429	7	7	3	5		1	1	No	1	200	C4orf32	protein_coding	C4orf32	ENSG00000174749	C4orf32	ensembl_havana	protein_coding	ENST00000309733:c.95G>A	ENSP00000310182:p.Gly32Glu	ENSP00000310182:p.Gly32Glu	ENST00000309733:c.95G>A	No	Yes
4	122735142	SNV	A	G	No	1		Homozygous	43	43	100	1	32	11	0.255814	37.8837	43	43	20	19		1	1	No	1	200	EXOSC9	protein_coding	EXOSC9	ENSG00000123737	EXOSC9	ensembl_havana	protein_coding	ENST00000379663:c.[1096A>G]; ENST00000512454:c.[1048A>G]; ENST00000513654:c.[*341A>G]; ENST00000511132:c.[454A>G]; ENST00000243498:c.[1096A>G]	ENSP00000368984:p.[Ile366Val]; ENSP00000425782:p.[Ile350Val]; ENSP00000424504:p.[Ile152Val]; ENSP00000243498:p.[Ile366Val]		ENST00000513654:c.*341A>G	No	Yes
4	122737965	SNV	G	C	No	1		Homozygous	129	129	100	1	45	84	0.348837	38.6589	129	129	40	40		1	1	No	1	200	EXOSC9, CCNA2	protein_coding, protein_coding	EXOSC9, CCNA2	ENSG00000123737, ENSG00000145386	EXOSC9, CCNA2	ensembl_havana, ensembl_havana	protein_coding, protein_coding	ENST00000379663:c.[1325G>C]; ENST00000512454:c.[1226G>C]; ENST00000243498:c.[1274G>C]; ENST00000274026:c.[*828C>G]; ENST00000513654:c.[*2840G>C]	ENSP00000368984:p.[Ser442Thr]; ENSP00000425782:p.[Ser409Thr]; ENSP00000243498:p.[Ser425Thr]		ENST00000513654:c.*2840G>C	No	Yes
4	122742217	SNV	T	C	No	1		Homozygous	68	68	100	1	40	28	0.411765	39.2941	68	68	27	28		1	1	No	1	200	CCNA2	protein_coding	CCNA2	ENSG00000145386	CCNA2	ensembl_havana	protein_coding	ENST00000274026:c.487A>G	ENSP00000274026:p.Ile163Val	ENSP00000274026:p.Ile163Val	ENST00000274026:c.487A>G	No	Yes
4	128807219	SNV	T	A	No	1		Homozygous	10	10	100	1	3	7	0.3	32.9	10	10	9	9		1	1	No	1	200	PLK4	protein_coding	PLK4	ENSG00000142731	PLK4	ensembl_havana	protein_coding	ENST00000270861:c.[694T>A]; ENST00000507249:c.[694T>A]; ENST00000515069:c.[694T>A]; ENST00000513090:c.[598T>A]; ENST00000514379:c.[571T>A]	ENSP00000270861:p.[Ser232Thr]; ENSP00000423412:p.[Ser232Thr]; ENSP00000421774:p.[Ser232Thr]; ENSP00000427554:p.[Ser200Thr]; ENSP00000423582:p.[Ser191Thr]	ENSP00000270861:p.Ser232Thr	ENST00000270861:c.694T>A	No	Yes
4	128814964	SNV	G	T	No	1		Homozygous	15	15	100	1	8	7	0.466667	38.9333	15	15	12	12		1	1	No	1	200	PLK4	protein_coding	PLK4	ENSG00000142731	PLK4	ensembl_havana	protein_coding	ENST00000514379:c.[2367G>T]; ENST00000270861:c.[2490G>T]; ENST00000513090:c.[2394G>T]; ENST00000508113:c.[228G>T]; ENST00000507249:c.[2307G>T]; ENST00000515069:c.[2256G>T]	ENSP00000423582:p.[Glu789Asp]; ENSP00000270861:p.[Glu830Asp]; ENSP00000427554:p.[Glu798Asp]; ENSP00000427568:p.[Glu76Asp]; ENSP00000423412:p.[Glu769Asp]; ENSP00000421774:p.[Glu752Asp]	ENSP00000270861:p.Glu830Asp	ENST00000270861:c.2490G>T	No	Yes
4	139980290^139980291	Insertion	-	T	No	1		Heterozygous	6	39	15.3846	1	2	4	0.333333	38.5	6	39	5	5	0	0.587469	0.853628	Yes	6	200	ELF2	protein_coding	ELF2	ENSG00000109381	ELF2	ensembl_havana	protein_coding	ENST00000379550:c.[1628_1629insA]; ENST00000379549:c.[1361_1362insA]; ENST00000358635:c.[1448_1449insA]; ENST00000394235:c.[1592_1593insA]; ENST00000265495:c.[1592_1593insA]; ENST00000510408:c.[1412_1413insA]	ENSP00000368868:p.[Gln544fs]; ENSP00000368867:p.[Gln455fs]; ENSP00000351458:p.[Gln484fs]; ENSP00000377782:p.[Gln532fs]; ENSP00000265495:p.[Gln532fs]; ENSP00000426997:p.[Gln472fs]	ENSP00000377782:p.Gln532fs	ENST00000394235:c.1592_1593insA	No	Yes
4	140058849	SNV	A	T	No	1		Homozygous	13	13	100	1	11	2	0.153846	35.7692	13	13	7	7		1	1	No	1	200	ELF2	protein_coding	ELF2	ENSG00000109381	ELF2	ensembl_havana	protein_coding	ENST00000379550:c.[7T>A]; ENST00000511184:c.[7T>A]; ENST00000265495:c.[7T>A]; ENST00000394235:c.[7T>A]	ENSP00000368868:p.[Ser3Thr]; ENSP00000421278:p.[Ser3Thr]; ENSP00000265495:p.[Ser3Thr]; ENSP00000377782:p.[Ser3Thr]	ENSP00000377782:p.Ser3Thr	ENST00000394235:c.7T>A	No	Yes
4	141294814	SNV	G	C	No	1		Homozygous	8	8	100	1	8	0	0	37.5	8	8	5	5		1	1	No	1	200	SCOC	protein_coding	SCOC	ENSG00000153130	SCOC	ensembl_havana	protein_coding	ENST00000510586:c.[-488G>C]; ENST00000512749:c.[-51+116G>C]; ENST00000394203:c.[71-5461G>C]; ENST00000506597:c.[124G>C]; ENST00000338517:c.[71-5461G>C]; ENST00000608372:c.[124G>C]; ENST00000394205:c.[71-5461G>C]; ENST00000506322:c.[-154-3015G>C]; ENST00000394201:c.[-108G>C]	ENSP00000426649:p.[Val42Leu]; ENSP00000477352:p.[Val42Leu]	ENSP00000477352:p.Val42Leu	ENST00000608372:c.124G>C	No	Yes
4	155460288^155460289	Insertion	-	T	No	1		Heterozygous	7	95	7.36842	1	4	3	0.428571	37.4286	7	95	4	4	0	0.266469	0.517764	Yes	6	200	PLRG1	protein_coding	PLRG1	ENSG00000171566	PLRG1	ensembl_havana	protein_coding	ENST00000499023:c.[1119_1120insA]; ENST00000506627:c.[432_433insA]; ENST00000503251:c.[48_49insA]; ENST00000302078:c.[1092_1093insA]; ENST00000393905:c.[1119_1120insA]	ENSP00000424417:p.[Ser374fs]; ENSP00000425914:p.[Ser145fs]; ENSP00000426497:p.[Ser17fs]; ENSP00000303191:p.[Ser365fs]; ENSP00000377483:p.[Ser374fs]	ENSP00000424417:p.Ser374fs	ENST00000499023:c.1119_1120insA	No	Yes
4	156273768	SNV	T	C	No	1		Homozygous	14	14	100	1	8	6	0.428571	38.7857	14	14	10	9		1	1	No	1	200	AC097467.2, MAP9	antisense, protein_coding	AC097467.2, MAP9	ENSG00000250910, ENSG00000164114	AC097467.2, MAP9	havana, ensembl_havana	antisense, protein_coding	ENST00000503466:c.[70A>G]; ENST00000515654:c.[1729A>G]; ENST00000311277:c.[1801A>G]	ENSP00000422989:p.[Asn24Asp]; ENSP00000427402:p.[Asn577Asp]; ENSP00000310593:p.[Asn601Asp]	ENSP00000310593:p.Asn601Asp	ENST00000311277:c.1801A>G	No	Yes
4	156274377	SNV	T	C	No	1		Homozygous	10	11	90.9091	1	6	4	0.4	34.4	10	11	8	8		0.951146	1	No	1	200	AC097467.2, MAP9	antisense, protein_coding	AC097467.2, MAP9	ENSG00000250910, ENSG00000164114	AC097467.2, MAP9	havana, ensembl_havana	antisense, protein_coding	ENST00000515654:c.[1424A>G]; ENST00000311277:c.[1496A>G]; ENST00000424373:c.[*196A>G]	ENSP00000427402:p.[Lys475Arg]; ENSP00000310593:p.[Lys499Arg]	ENSP00000310593:p.Lys499Arg	ENST00000311277:c.1496A>G	No	Yes
4	156618092	SNV	G	A	No	1		Homozygous	7	7	100	1	4	3	0.428571	38.8571	7	7	5	5		1	1	No	1	200	GUCY1A3	protein_coding	GUCY1A3	ENSG00000164116	GUCY1A3	ensembl_havana	protein_coding	ENST00000455639:c.[73G>A]; ENST00000511507:c.[73G>A]; ENST00000509901:c.[73G>A]; ENST00000393832:c.[-702G>A]; ENST00000513574:c.[73G>A]; ENST00000511108:c.[73G>A]; ENST00000506455:c.[73G>A]; ENST00000515201:c.[73G>A]; ENST00000296518:c.[73G>A]; ENST00000443668:c.[73G>A]	ENSP00000412201:p.[Val25Ile]; ENSP00000426968:p.[Val25Ile]; ENSP00000424863:p.[Val25Ile]; ENSP00000426040:p.[Val25Ile]; ENSP00000421493:p.[Val25Ile]; ENSP00000424361:p.[Val25Ile]; ENSP00000422141:p.[Val25Ile]; ENSP00000296518:p.[Val25Ile]; ENSP00000409903:p.[Val25Ile]	ENSP00000296518:p.Val25Ile	ENST00000296518:c.73G>A	No	Yes
4	159631991	SNV	G	T	No	1		Homozygous	39	39	100	1	13	26	0.333333	38.8718	39	39	23	23		1	1	No	1	200	PPID	protein_coding	PPID	ENSG00000171497	PPID	ensembl_havana	protein_coding	ENST00000307720:c.[904C>A]; ENST00000512699:c.[*351C>A]	ENSP00000303754:p.Leu302Ile	ENSP00000303754:p.Leu302Ile	ENST00000307720:c.904C>A	No	Yes
4	164435265	SNV	A	C	No	1		Heterozygous	36	39	92.3077	1	18	18	0.5	38.8056	36	39	20	20	0	0.999623	1	No	1	200	TMA16	protein_coding	TMA16	ENSG00000198498	TMA16	ensembl_havana	protein_coding	ENST00000513134:c.[194A>C]; ENST00000513272:c.[194A>C]; ENST00000509657:c.[308A>C]; ENST00000508268:c.[194A>C]; ENST00000358572:c.[194A>C]	ENSP00000423901:p.[Gln65Pro]; ENSP00000426933:p.[Gln65Pro]; ENSP00000425347:p.[Gln103Pro]; ENSP00000423375:p.[Gln65Pro]; ENSP00000351380:p.[Gln65Pro]	ENSP00000351380:p.Gln65Pro	ENST00000358572:c.194A>C	No	Yes
4	164440581	SNV	T	C	No	1		Homozygous	31	31	100	1	15	16	0.483871	37.4194	31	31	17	16		1	1	No	1	200	TMA16	protein_coding	TMA16	ENSG00000198498	TMA16	ensembl_havana	protein_coding	ENST00000358572:c.[527T>C]; ENST00000509657:c.[641T>C]; ENST00000513134:c.[240-553T>C]; ENST00000513272:c.[*111T>C]	ENSP00000351380:p.[Ile176Thr]; ENSP00000425347:p.[Ile214Thr]	ENSP00000351380:p.Ile176Thr	ENST00000358572:c.527T>C	No	Yes
4	170663235	SNV	C	T	No	1		Homozygous	62	62	100	1	26	36	0.419355	37.6129	62	62	23	22		1	1	No	1	200	C4orf27	protein_coding	C4orf27	ENSG00000056050	C4orf27	ensembl_havana	protein_coding	ENST00000393381:c.521G>A	ENSP00000406598:p.Arg174Lys	ENSP00000406598:p.Arg174Lys	ENST00000393381:c.521G>A	No	Yes
4	178274835	SNV	A	C	No	1		Homozygous	16	16	100	1	8	8	0.5	37.375	16	16	12	12		1	1	No	1	200	NEIL3, RP11-376O6.2	protein_coding, antisense	NEIL3, RP11-376O6.2	ENSG00000109674, ENSG00000249084	NEIL3, RP11-376O6.2	ensembl_havana, havana	protein_coding, antisense	ENST00000264596:c.[1413A>C]; ENST00000513321:c.[*687A>C]	ENSP00000264596:p.Gln471His	ENSP00000264596:p.Gln471His	ENST00000264596:c.1413A>C	No	Yes
4	178281754	SNV	G	A	No	1		Homozygous	14	14	100	1	8	6	0.428571	37.4286	14	14	11	10		1	1	No	1	200	NEIL3	protein_coding	NEIL3	ENSG00000109674	NEIL3	ensembl_havana	protein_coding	ENST00000264596:c.1558G>A	ENSP00000264596:p.Gly520Arg	ENSP00000264596:p.Gly520Arg	ENST00000264596:c.1558G>A	No	Yes
4	178359960	SNV	G	C	No	1		Homozygous	11	11	100	1	3	8	0.272727	39.7273	11	11	7	6		1	1	No	1	200	AGA	protein_coding	AGA	ENSG00000038002	AGA	ensembl_havana	protein_coding	ENST00000264595:c.[446C>G]; ENST00000502310:c.[101C>G]; ENST00000510635:c.[140C>G]	ENSP00000264595:p.[Thr149Ser]; ENSP00000423798:p.[Thr34Ser]; ENSP00000421471:p.[Thr47Ser]	ENSP00000264595:p.Thr149Ser	ENST00000264595:c.446C>G	No	Yes
4	178359970	SNV	A	C	No	1		Homozygous	24	24	100	1	9	15	0.375	39.3333	24	24	13	11		1	1	No	1	200	AGA	protein_coding	AGA	ENSG00000038002	AGA	ensembl_havana	protein_coding	ENST00000264595:c.[436T>G]; ENST00000510635:c.[130T>G]; ENST00000502310:c.[91T>G]	ENSP00000264595:p.[Leu146Val]; ENSP00000421471:p.[Leu44Val]; ENSP00000423798:p.[Leu31Val]	ENSP00000264595:p.Leu146Val	ENST00000264595:c.436T>G	No	Yes
4	184570715	SNV	T	G	No	1		Homozygous	40	40	100	1	10	30	0.25	38.9	40	40	20	19		1	1	No	1	200	RWDD4	protein_coding	RWDD4	ENSG00000182552	RWDD4	ensembl_havana	protein_coding	ENST00000326397:c.[370A>C]; ENST00000512740:c.[181A>C]; ENST00000510702:c.[*231A>C]; ENST00000327570:c.[370A>C]; ENST00000510968:c.[85A>C]; ENST00000514322:c.[*98A>C]	ENSP00000388920:p.[Ile124Leu]; ENSP00000423598:p.[Ile61Leu]; ENSP00000332177:p.[Ile124Leu]; ENSP00000426329:p.[Ile29Leu]	ENSP00000388920:p.Ile124Leu	ENST00000326397:c.370A>C	No	Yes
4	187518871	SNV	G	A	No	1		Homozygous	28	29	96.5517	1	20	8	0.285714	37.2143	28	29	19	19		0.999954	1	No	1	200	FAT1	protein_coding	FAT1	ENSG00000083857	FAT1	ensembl_havana	protein_coding	ENST00000441802:c.[12333C>T]; ENST00000507105:c.[128C>T]	ENSP00000423801:p.[Pro43Leu]		ENST00000441802:c.12333C>T	No	Yes
4	187519206	SNV	C	G	No	1		Homozygous	32	32	100	1	13	19	0.40625	37.2812	32	32	13	14		1	1	No	1	200	FAT1	protein_coding	FAT1	ENSG00000083857	FAT1	ensembl_havana	protein_coding	ENST00000441802:c.12177G>C	ENSP00000406229:p.Lys4059Asn	ENSP00000406229:p.Lys4059Asn	ENST00000441802:c.12177G>C	No	Yes
4	187525020	SNV	A	C	No	1		Homozygous	25	26	96.1538	1	10	15	0.4	36.72	25	26	15	14		0.999995	1	No	1	200	FAT1	protein_coding	FAT1	ENSG00000083857	FAT1	ensembl_havana	protein_coding	ENST00000441802:c.10660T>G	ENSP00000406229:p.Ser3554Ala	ENSP00000406229:p.Ser3554Ala	ENST00000441802:c.10660T>G	No	Yes
5	886744	SNV	C	T	No	1		Heterozygous	6	20	30	1	2	4	0.333333	37	6	20	6	6	1.24	0.478952	0.639759	No	1	156.536	BRD9	protein_coding	BRD9	ENSG00000028310	BRD9	ensembl_havana	protein_coding	ENST00000323510:c.[508G>A]; ENST00000489093:c.[508G>A]; ENST00000435709:c.[448G>A]; ENST00000483173:c.[637G>A]; ENST00000489816:c.[*488G>A]; ENST00000388890:c.[448G>A]; ENST00000467963:c.[796G>A]; ENST00000490814:c.[*661G>A]; ENST00000495265:c.[*548G>A]; ENST00000466684:c.[*488G>A]	ENSP00000323557:p.[Ala170Thr]; ENSP00000420722:p.[Ala170Thr]; ENSP00000402984:p.[Ala150Thr]; ENSP00000419845:p.[Ala213Thr]; ENSP00000373542:p.[Ala150Thr]; ENSP00000419765:p.[Ala266Thr]		ENST00000490814:c.*661G>A	No	Yes
5	5460619	SNV	G	C	No	1		Homozygous	6	6	100	1	2	4	0.333333	38.1667	6	6	6	6		1	1	No	1	200	KIAA0947	protein_coding	KIAA0947	ENSG00000164151	KIAA0947	ensembl_havana	protein_coding	ENST00000296564:c.1172G>C	ENSP00000296564:p.Cys391Ser	ENSP00000296564:p.Cys391Ser	ENST00000296564:c.1172G>C	No	Yes
5	5462148	SNV	G	A	No	1		Homozygous	7	7	100	1	4	3	0.428571	37	7	7	7	6		1	1	No	1	200	KIAA0947	protein_coding	KIAA0947	ENSG00000164151	KIAA0947	ensembl_havana	protein_coding	ENST00000296564:c.2701G>A	ENSP00000296564:p.Val901Ile	ENSP00000296564:p.Val901Ile	ENST00000296564:c.2701G>A	No	Yes
5	6656210	SNV	G	A	No	1		Homozygous	85	85	100	1	43	42	0.494118	35.9765	85	85	32	33		1	1	No	1	200	SRD5A1	protein_coding	SRD5A1	ENSG00000145545	SRD5A1	ensembl_havana	protein_coding	ENST00000513117:c.[313G>A]; ENST00000274192:c.[480G>A]; ENST00000538824:c.[339G>A]; ENST00000537411:c.[*423G>A]; ENST00000510531:c.[*601G>A]	ENSP00000421342:p.[Gly105Arg]		ENST00000274192:c.480G>A	No	Yes
5	7878179	SNV	C	T	No	1		Heterozygous	23	29	79.3103	1	13	10	0.434783	38.6957	23	29	17	17	0	0.971878	1	No	1	200	MTRR	protein_coding	MTRR	ENSG00000124275	MTRR	ensembl_havana	protein_coding	ENST00000514220:c.[308C>T]; ENST00000510525:c.[548C>T]; ENST00000264668:c.[605C>T]; ENST00000510279:c.[*193C>T]; ENST00000341013:c.[*193C>T]; ENST00000514369:c.[*188C>T]; ENST00000513439:c.[*231C>T]; ENST00000440940:c.[524C>T]; ENST00000511461:c.[*193C>T]	ENSP00000423863:p.[Ser103Leu]; ENSP00000421991:p.[Ser183Leu]; ENSP00000264668:p.[Ser202Leu]; ENSP00000402510:p.[Ser175Leu]	ENSP00000264668:p.Ser202Leu	ENST00000264668:c.605C>T	No	Yes
5	7885959	SNV	A	G	No	1		Heterozygous	13	30	43.3333	1	4	9	0.307692	38.1538	13	30	12	12	0	0.545237	0.999948	No	1	200	MTRR	protein_coding	MTRR	ENSG00000124275	MTRR	ensembl_havana	protein_coding	ENST00000513439:c.[*756A>G]; ENST00000510525:c.[1073A>G]; ENST00000341013:c.[*718A>G]; ENST00000264668:c.[1130A>G]; ENST00000440940:c.[1049A>G]; ENST00000511461:c.[*718A>G]	ENSP00000421991:p.[Lys358Arg]; ENSP00000264668:p.[Lys377Arg]; ENSP00000402510:p.[Lys350Arg]	ENSP00000264668:p.Lys377Arg	ENST00000264668:c.1130A>G	No	Yes
5	7897191	SNV	C	T	No	1		Heterozygous	13	41	31.7073	1	8	5	0.384615	38.6923	13	41	7	7	0	0.241272	0.855014	No	1	200	MTRR	protein_coding	MTRR	ENSG00000124275	MTRR	ensembl_havana	protein_coding	ENST00000440940:c.[1783C>T]; ENST00000264668:c.[1864C>T]; ENST00000511461:c.[*1452C>T]; ENST00000513439:c.[*1490C>T]; ENST00000510525:c.[*602C>T]	ENSP00000402510:p.[His595Tyr]; ENSP00000264668:p.[His622Tyr]	ENSP00000264668:p.His622Tyr	ENST00000264668:c.1864C>T	No	Yes
5	10258411^10258412	Insertion	-	A	No	1		Heterozygous	27	885	3.05085	1	18	9	0.333333	39.037	27	885	16	15	0	0.509136	0.99216	Yes	4	200	CCT5	protein_coding	CCT5	ENSG00000150753	CCT5	ensembl_havana	protein_coding	ENST00000280326:c.[719_720insA]; ENST00000512975:c.[*159_*160insA]; ENST00000515676:c.[605_606insA]; ENST00000515390:c.[554_555insA]; ENST00000503026:c.[656_657insA]; ENST00000506600:c.[440_441insA]; ENST00000503454:c.[*420_*421insA]	ENSP00000280326:p.[Val243fs]; ENSP00000427297:p.[Val205fs]; ENSP00000426923:p.[Val188fs]; ENSP00000423318:p.[Val222fs]; ENSP00000423052:p.[Val150fs]	ENSP00000280326:p.Val243fs	ENST00000280326:c.719_720insA	No	Yes
5	16668390	SNV	C	G	No	1		Heterozygous	13	36	36.1111	1	2	11	0.153846	37.0769	13	36	9	9	1.17	0.583644	0.443984	No	1	200	MYO10	protein_coding	MYO10	ENSG00000145555	MYO10	ensembl_havana	protein_coding	ENST00000513610:c.[6071G>C]; ENST00000274203:c.[4142G>C]; ENST00000427430:c.[4142G>C]; ENST00000505695:c.[4088G>C]; ENST00000515803:c.[4088G>C]	ENSP00000421280:p.[Ser2024Thr]; ENSP00000274203:p.[Ser1381Thr]; ENSP00000391106:p.[Ser1381Thr]; ENSP00000421170:p.[Ser1363Thr]; ENSP00000425051:p.[Ser1363Thr]	ENSP00000421280:p.Ser2024Thr	ENST00000513610:c.6071G>C	No	Yes
5	16673975	SNV	C	G	No	1		Homozygous	27	27	100	1	13	14	0.481481	37.1852	27	27	17	17		1	1	No	1	200	MYO10	protein_coding	MYO10	ENSG00000145555	MYO10	ensembl_havana	protein_coding	ENST00000513610:c.[4988G>C]; ENST00000427430:c.[3059G>C]; ENST00000274203:c.[3059G>C]; ENST00000515803:c.[3005G>C]; ENST00000505695:c.[3005G>C]	ENSP00000421280:p.[Ser1663Thr]; ENSP00000391106:p.[Ser1020Thr]; ENSP00000274203:p.[Ser1020Thr]; ENSP00000425051:p.[Ser1002Thr]; ENSP00000421170:p.[Ser1002Thr]	ENSP00000421280:p.Ser1663Thr	ENST00000513610:c.4988G>C	No	Yes
5	32403346	SNV	C	T	No	1		Homozygous	24	24	100	1	16	8	0.333333	37.0833	24	24	18	18		1	1	No	1	200	ZFR	protein_coding	ZFR	ENSG00000056097	ZFR	ensembl_havana	protein_coding	ENST00000265069:c.1381G>A	ENSP00000265069:p.Val461Ile	ENSP00000265069:p.Val461Ile	ENST00000265069:c.1381G>A	No	Yes
5	33989518	SNV	C	T	No	1		Homozygous	14	14	100	1	5	9	0.357143	38.8571	14	14	9	9		1	1	No	1	200	AMACR, RP11-1084J3.4	protein_coding, protein_coding	AMACR, RP11-1084J3.4	ENSG00000242110, ENSG00000273294	AMACR, RP11-1084J3.4	ensembl_havana, havana	protein_coding, protein_coding	ENST00000335606:c.[829G>A]; ENST00000382072:c.[*71G>A]; ENST00000502637:c.[784G>A]; ENST00000382079:c.[*255G>A]; ENST00000506639:c.[*151G>A]; ENST00000382085:c.[829G>A]	ENSP00000334424:p.[Glu277Lys]; ENSP00000424351:p.[Glu262Lys]; ENSP00000371517:p.[Glu277Lys]	ENSP00000334424:p.Glu277Lys	ENST00000335606:c.829G>A	No	Yes
5	33998883	SNV	A	G	No	1		Homozygous	25	25	100	1	6	19	0.24	37.04	25	25	14	15		1	1	No	1	200	AMACR, RP11-1084J3.4	protein_coding, protein_coding	AMACR, RP11-1084J3.4	ENSG00000242110, ENSG00000273294	AMACR, RP11-1084J3.4	ensembl_havana, havana	protein_coding, protein_coding	ENST00000382072:c.[441T>C]; ENST00000441713:c.[441T>C]; ENST00000382079:c.[*28T>C]; ENST00000382068:c.[441T>C]; ENST00000512079:c.[602T>C]; ENST00000382085:c.[602T>C]; ENST00000426255:c.[602T>C]; ENST00000502637:c.[557T>C]; ENST00000335606:c.[602T>C]; ENST00000506639:c.[441T>C]	ENSP00000477411:p.[Leu201Ser]; ENSP00000371517:p.[Leu201Ser]; ENSP00000476965:p.[Leu201Ser]; ENSP00000424351:p.[Leu186Ser]; ENSP00000334424:p.[Leu201Ser]	ENSP00000334424:p.Leu201Ser	ENST00000335606:c.602T>C	No	Yes
5	38919158	SNV	G	A	No	1		Heterozygous	7	9	77.7778	1	2	5	0.285714	37.7143	7	9	6	6		0.913763	0.988323	No	1	200	OSMR	protein_coding	OSMR	ENSG00000145623	OSMR	ensembl_havana	protein_coding	ENST00000274276:c.[1579G>A]; ENST00000513831:c.[400G>A]	ENSP00000274276:p.[Glu527Lys]; ENSP00000423913:p.[Glu134Lys]	ENSP00000274276:p.Glu527Lys	ENST00000274276:c.1579G>A	No	Yes
5	42800843^42800844	Insertion	-	T	No	1		Heterozygous	19	260	7.30769	1	9	10	0.473684	38.1579	19	260	12	12	0	0.128807	1	Yes	6	200	CCDC152, SEPP1	protein_coding, protein_coding	CCDC152, SEPP1	ENSG00000198865, ENSG00000250722	CCDC152, SEPP1	ensembl_havana, havana	protein_coding, protein_coding	ENST00000361970:c.[*960_*961insT]; ENST00000514985:c.[1124_1125insA]; ENST00000511224:c.[1124_1125insA]; ENST00000506577:c.[1124_1125insA]	ENSP00000420939:p.[*376fs]; ENSP00000427671:p.[*376fs]; ENSP00000425915:p.[*376fs]		ENST00000361970:c.*960_*961insT	No	Yes
5	43297184	SNV	A	G	No	1		Heterozygous	13	46	28.2609	1	4	9	0.307692	38.4615	13	46	7	7	0	0.516591	0.721682	No	1	200	HMGCS1	protein_coding	HMGCS1	ENSG00000112972	HMGCS1	ensembl_havana	protein_coding	ENST00000325110:c.[659T>C]; ENST00000433297:c.[659T>C]	ENSP00000322706:p.[Leu220Pro]; ENSP00000399402:p.[Leu220Pro]	ENSP00000322706:p.Leu220Pro	ENST00000325110:c.659T>C	No	Yes
5	43509348	SNV	T	A	No	1		Homozygous	6	6	100	1	3	3	0.5	39.5	6	6	4	4		1	1	No	1	200	RP11-159F24.3, C5orf34	processed_transcript, protein_coding	RP11-159F24.3, C5orf34	ENSG00000249492, ENSG00000172244	RP11-159F24.3, C5orf34	havana, ensembl_havana	processed_transcript, protein_coding	ENST00000509489:c.[-57-2852A>T]; ENST00000306862:c.[94A>T]	ENSP00000303490:p.Thr32Ser	ENSP00000303490:p.Thr32Ser	ENST00000306862:c.94A>T	No	Yes
5	43529934^43529935	Insertion	-	A	No	1		Heterozygous	9	289	3.11419	1	4	5	0.444444	39.4444	9	289	6	7	0	0.0832461	0.877866	Yes	6	200	PAIP1	protein_coding	PAIP1	ENSG00000172239	PAIP1	ensembl_havana	protein_coding	ENST00000306846:c.[1299_1300insT]; ENST00000514514:c.[1016-2364_1016-2363insT]; ENST00000338972:c.[963_964insT]; ENST00000514816:c.[102_103insT]; ENST00000504639:c.[*386_*387insT]; ENST00000436644:c.[1062_1063insT]	ENSP00000302768:p.[Pro434fs]; ENSP00000339622:p.[Pro322fs]; ENSP00000426089:p.[Pro35fs]; ENSP00000387729:p.[Pro355fs]	ENSP00000302768:p.Pro434fs	ENST00000306846:c.1299_1300insT	No	Yes
5	44809162	SNV	G	C	No	1		Homozygous	12	12	100	1	11	1	0.0833333	37.75	12	12	10	10		1	1	No	1	200	MRPS30	protein_coding	MRPS30	ENSG00000112996	MRPS30	ensembl_havana	protein_coding	ENST00000507110:c.98G>C	ENSP00000424328:p.Cys33Ser	ENSP00000424328:p.Cys33Ser	ENST00000507110:c.98G>C	No	Yes
5	52096889	SNV	C	A	No	1		Homozygous	18	18	100	1	9	9	0.5	39.0556	18	18	12	10		1	1	No	1	200	ITGA1, PELO	protein_coding, protein_coding	ITGA1, PELO	ENSG00000213949, ENSG00000152684	ITGA1, PELO	ensembl_havana, ensembl_havana	protein_coding, protein_coding	ENST00000274311:c.[661C>A]; ENST00000282588:c.[61+12641C>A]	ENSP00000274311:p.Leu221Met		ENST00000282588:c.61+12641C>A	No	Yes
5	52942083	SNV	A	C	No	1		Homozygous	84	84	100	1	29	55	0.345238	38.3929	84	84	30	28		1	1	No	1	200	NDUFS4	protein_coding	NDUFS4	ENSG00000164258	NDUFS4	ensembl_havana	protein_coding	ENST00000507026:c.[*172A>C]; ENST00000506765:c.[186A>C]; ENST00000502423:c.[*65A>C]; ENST00000296684:c.[198A>C]; ENST00000506974:c.[370A>C]	ENSP00000425967:p.[Ser124Arg]	ENSP00000425967:p.Ser124Arg	ENST00000506974:c.370A>C	No	Yes
5	54459961	SNV	A	G	No	1		Homozygous	15	15	100	1	6	9	0.4	37.8667	15	15	11	11		1	1	No	1	200	CDC20B, GPX8	protein_coding, protein_coding	CDC20B, GPX8	ENSG00000164287, ENSG00000164294	CDC20B, GPX8	ensembl_havana, ensembl_havana	protein_coding, protein_coding	ENST00000381375:c.[126+8455T>C]; ENST00000296733:c.[126+8455T>C]; ENST00000322374:c.[126+8455T>C]; ENST00000296734:c.[*10A>G]; ENST00000331730:c.[63+8805T>C]; ENST00000515370:c.[392A>G]; ENST00000513180:c.[126+8455T>C]; ENST00000507931:c.[63+8805T>C]; ENST00000334206:c.[126+8455T>C]; ENST00000503787:c.[545A>G]	ENSP00000427466:p.[Lys131Arg]; ENSP00000423822:p.[Lys182Arg]		ENST00000296734:c.*10A>G	No	Yes
5	54527316	SNV	C	T	No	1		Homozygous	23	23	100	1	7	16	0.304348	35.1739	23	23	16	14		1	1	No	1	200	CCNO	protein_coding	CCNO	ENSG00000152669	CCNO	ensembl_havana	protein_coding	ENST00000501463:c.[*920G>A]; ENST00000282572:c.[940G>A]	ENSP00000282572:p.Glu314Lys		ENST00000501463:c.*920G>A	No	Yes
5	56207123	SNV	T	A	No	1		Homozygous	15	15	100	1	8	7	0.466667	38.6667	15	15	7	7		1	1	No	1	200	SETD9	protein_coding	SETD9	ENSG00000155542	SETD9	ensembl_havana	protein_coding	ENST00000285947:c.[226T>A]; ENST00000541720:c.[226T>A]; ENST00000418299:c.[98+1553T>A]	ENSP00000285947:p.[Ser76Thr]; ENSP00000442886:p.[Ser76Thr]	ENSP00000285947:p.Ser76Thr	ENST00000285947:c.226T>A	No	Yes
5	56209735	SNV	A	G	No	1		Homozygous	34	34	100	1	23	11	0.323529	38.0588	34	34	18	18		1	1	No	1	200	SETD9	protein_coding	SETD9	ENSG00000155542	SETD9	ensembl_havana	protein_coding	ENST00000541720:c.[625A>G]; ENST00000285947:c.[625A>G]; ENST00000418299:c.[*137A>G]	ENSP00000442886:p.[Lys209Glu]; ENSP00000285947:p.[Lys209Glu]	ENSP00000285947:p.Lys209Glu	ENST00000285947:c.625A>G	No	Yes
5	57751239^57751240	Insertion	-	T	No	1		Heterozygous	6	285	2.10526	1	3	3	0.5	35.5	6	285	5	5	0	0.588707	0.965986	No	1	200	PLK2	protein_coding	PLK2	ENSG00000145632	PLK2	ensembl_havana	protein_coding	ENST00000274289:c.1627_1628insA	ENSP00000274289:p.Thr543fs	ENSP00000274289:p.Thr543fs	ENST00000274289:c.1627_1628insA	No	Yes
5	57752799^57752800	Insertion	-	T	No	1		Heterozygous	13	247	5.26316	1	6	7	0.461538	36.5385	13	247	11	11	0	0.663107	0.944662	Yes	6	200	PLK2	protein_coding	PLK2	ENSG00000145632	PLK2	ensembl_havana	protein_coding	ENST00000274289:c.1128_1129insA	ENSP00000274289:p.Asp377fs	ENSP00000274289:p.Asp377fs	ENST00000274289:c.1128_1129insA	No	Yes
[truncated: 2,453 more rows]

## Sheet: Nx scr MDA-MB468
Chromosome	Region	Type	Reference	Allele	Reference allele	Length	Linkage	Zygosity	Count	Coverage	Frequency	Probability	Forward read count	Reverse read count	Forward/reverse balance	Average quality	Read count	Read coverage	# unique start positions	# unique end positions	BaseQRankSum	Read position test probability	Read direction test probability	Homopolymer	Homopolymer length	QUAL	Homo sapiens (hg19)_Gene	source (Homo sapiens (hg19)_Gene)	Gene Cards	ENSEMBL	gene_name (Homo sapiens (hg19)_Gene)	gene_source (Homo sapiens (hg19)_Gene)	gene_biotype (Homo sapiens (hg19)_Gene)	Coding region change	Amino acid change	Amino acid change in longest transcript	Coding region change in longest transcript	Other variants within codon	Non-synonymous
[truncated: 2,992 more rows]

[truncated: 10 more sheets: Hx siMB MDA-MB468, Hx scr MDA-MB468, Nx siMB LNCaP, Nx scr LNCaP, Hx siMB LNCaP, Hx scr LNCaP, Nx siMB DLD1, Nx scr DLD1, Hx siMB DLD1, Hx scr DLD1]
